# Supplementary material for: Microglial BIN1 deficiency elicits enhanced microglial inflammatory responses that mimic early AD pathology
Source: Research Square preprint supplement (doi:10.21203/rs.3.rs-7262443/v1), 2025-08-14
Supplement: Supplementary file 1 [file 00ee76c9060874062b961063.xlsx]

## Sheet: Micro_normal_vs_dementia
Suppl. File 2: DEGs (log2FC>0.25 and p value<0.05) found in human microglial cells between individuals clinically diagnosed with dementia or not (normal), or between individuals clinically diagnosed with AD at different Braak stages
DEGs (log2FC>0.25 and p value<0.05) found in human microglial cells between individuals clinically diagnosed with no dementia and individuals with dementia
	p_val	avg_log2FC	pct.1	pct.2	p_val_adj	cluster
PRKCA	4.8183979286766e-201	0.435249	0.854	0.768	1.06650419753328e-196	normal
LINC02712	5.4090511295579e-190	0.795588	0.379	0.24	1.19723937701635e-185	normal
ST6GAL1	2.65609270908224e-143	0.255598	0.992	0.979	5.87899560228263e-139	normal
TLN2	1.84536337329253e-121	0.389896	0.671	0.571	4.08452729044568e-117	normal
CX3CR1	1.75090802797633e-119	0.518108	0.531	0.426	3.8754598291228e-115	normal
NCKAP5	1.08220633174799e-118	0.381525	0.68	0.582	2.39535549469099e-114	normal
C3	2.55322377352805e-112	0.279212	0.888	0.83	5.65130550032698e-108	normal
MKNK1	4.38045602555669e-110	0.321665	0.777	0.716	9.69570136696718e-106	normal
ZFP36L1	1.97776173616062e-102	0.363817	0.835	0.784	4.37757782681791e-98	normal
TMEM163	5.74263874711013e-102	0.593336	0.533	0.437	1.27107566028536e-97	normal
FCGR3A	1.0082083940348e-88	0.516864	0.479	0.394	2.23156845935663e-84	normal
BIN1	5.46807853075311e-84	0.380906	0.61	0.528	1.21030450199689e-79	normal
LINC02232	7.64759069177121e-80	0.270982	0.726	0.638	1.69271772371664e-75	normal
MIR646HG	3.61508410807163e-71	0.304284	0.703	0.632	8.00162716480575e-67	normal
ERC2	1.11212864409814e-66	0.412459	0.539	0.467	2.46158554084683e-62	normal
ADAM7-AS1	4.9202983553149e-65	0.544574	0.476	0.409	1.0890588379654e-60	normal
RASGEF1C	5.37803237649965e-64	0.443857	0.535	0.467	1.19037368621443e-59	normal
DLEU7	1.94622531035891e-63	0.639388	0.443	0.38	4.30777510194842e-59	normal
HAMP	2.38550648726161e-63	0.748766	0.275	0.206	5.28008005890484e-59	normal
LINC01374	2.41420981493733e-61	0.258513	0.754	0.685	5.34361200438229e-57	normal
NAALADL2	3.28637163729282e-57	0.310168	0.509	0.429	7.27405498198393e-53	normal
PARD3B	4.76874797089839e-57	0.441817	0.296	0.224	1.05551467587865e-52	normal
MICOS10	2.78594197423638e-55	0.501491	0.358	0.289	6.1664039657748e-51	normal
ADGRB3	1.52287595934215e-53	0.282622	0.721	0.677	3.37073364840793e-49	normal
PPP6R2	1.64714559981833e-45	0.254688	0.679	0.64	3.64579207063789e-41	normal
A2M	2.49546809067382e-45	0.252374	0.734	0.689	5.52346907189743e-41	normal
NAIP	5.62167833512953e-43	0.271303	0.571	0.519	1.24430228269757e-38	normal
MRC1	6.80236836279898e-41	0.271856	0.334	0.267	1.50563621342193e-36	normal
MCF2L2	9.10647470436614e-41	0.521585	0.328	0.272	2.0156271110644e-36	normal
BTG2	1.19942705101131e-37	0.562138	0.3	0.248	2.65481183470843e-33	normal
NAV2	4.95259469643174e-37	0.363226	0.417	0.359	1.0962073101082e-32	normal
KCNMB2-AS1	9.9461723284159e-37	0.336574	0.312	0.253	2.20148578317157e-32	normal
LINC01091	5.05777442820452e-36	0.250084	0.295	0.236	1.11948779193879e-31	normal
MROCKI	4.43203335242076e-35	0.407344	0.298	0.245	9.80986262224811e-31	normal
ITGA9	1.86020913289283e-34	0.273768	0.54	0.491	4.11738689474498e-30	normal
SHOC1	8.57709297218756e-34	0.416652	0.358	0.306	1.898453758464e-29	normal
NRXN3	1.11597311555283e-33	0.272042	0.614	0.576	2.47009489396464e-29	normal
OPRM1	1.43302136658432e-30	0.370638	0.303	0.253	3.17184949279774e-26	normal
CCDC26	2.40914349469481e-30	0.42687	0.343	0.294	5.33239821115749e-26	normal
B3GNT5	3.71652292785406e-30	0.313656	0.463	0.417	8.22615184851218e-26	normal
ENTPD1-AS1	3.71672593415063e-30	0.262302	0.555	0.511	8.22660118264901e-26	normal
LAP3	2.37452130573777e-29	0.296333	0.397	0.346	5.25576545811997e-25	normal
BIN2	3.44051534501355e-29	0.277336	0.392	0.342	7.615236664653e-25	normal
TARBP1	4.03143614466932e-29	0.355407	0.26	0.212	8.92318076261107e-25	normal
PLCB1	3.71939713419062e-28	0.280439	0.413	0.365	8.23251361681752e-24	normal
GPATCH2	6.15724425938093e-28	0.281907	0.344	0.293	1.36284444437137e-23	normal
FCGR1BP	1.69931931899448e-26	0.349721	0.262	0.216	3.76127338066238e-22	normal
LINC01141	2.70288727149274e-25	0.295642	0.447	0.409	5.98257068672202e-21	normal
SLC8A1-AS1	3.1937523942118e-25	0.342925	0.293	0.25	7.06905154934839e-21	normal
GOLGA4	5.45499061455606e-25	0.282602	0.77	0.761	1.20740762262584e-20	normal
PLB1	7.5052972879972e-25	0.309089	0.315	0.269	1.6612225017253e-20	normal
IL4R	1.0286558794613e-24	0.266948	0.522	0.49	2.27682692359964e-20	normal
MED12L	9.46689652415728e-23	0.297874	0.317	0.274	2.09540287665697e-18	normal
GRIK2	8.2744085406753e-22	0.299568	0.402	0.365	1.83145758639307e-17	normal
DPH6	1.59760678593193e-20	0.261317	0.295	0.253	3.53614285998174e-16	normal
ROBO2	1.64503742270382e-18	0.252862	0.494	0.463	3.64112583141264e-14	normal
MAP3K8	7.98738015115399e-17	0.330058	0.446	0.42	1.76792672265642e-12	normal
PAQR3	2.70282502123787e-16	0.324452	0.255	0.221	5.98243290200791e-12	normal
GRIA2	1.10733770616051e-15	0.270244	0.339	0.305	2.45098127881567e-11	normal
KCNQ1OT1	1.76343362842538e-14	0.258707	0.308	0.276	3.90318399315675e-10	normal
RPL32	6.09787863971048e-13	0.256499	0.297	0.267	1.34970445811352e-08	normal
GRIK1	2.18705145793788e-12	0.250874	0.255	0.226	4.8408196969997e-08	normal
NTM	8.6929804481879e-11	0.288155	0.253	0.227	1.92410429240191e-06	normal
FAM118A	1.92971600639689e-09	0.253392	0.256	0.233	4.27123340855887e-05	normal
FAM177B	1.81525006996722e-06	0.270783	0.331	0.315	0.0401787	normal
SLC2A3	4.32746709982539e-05	0.286214	0.265	0.246	0.957842	normal
MT-CYB	0	1.31424	0.609	0.391	0	dementia
MT-ND3	0	1.47924	0.657	0.447	0	dementia
MT-ATP6	0	1.31957	0.647	0.441	0	dementia
MT-ND4	0	1.17146	0.652	0.452	0	dementia
MT-ND1	0	1.22144	0.512	0.317	0	dementia
MT-ND2	0	1.04603	0.525	0.342	0	dementia
MT-CO2	0	1.13483	0.706	0.533	0	dementia
MT-CO3	0	1.01996	0.722	0.564	0	dementia
DPYD	3.9897175748413e-251	0.669161	0.806	0.724	8.83084088015373e-247	dementia
MT-CO1	2.29627437675954e-222	0.651597	0.642	0.503	5.08257370551956e-218	dementia
FKBP5	1.29126675997989e-220	0.322148	0.976	0.956	2.85808984653948e-216	dementia
MT-ND5	1.89706895055503e-210	0.963553	0.357	0.217	4.1989724151585e-206	dementia
ARL17B	8.89086105593727e-175	0.71925	0.36	0.225	1.96790318612115e-170	dementia
NHSL1	9.26490194588559e-149	0.739665	0.674	0.593	2.05069339670232e-144	dementia
ACSL1	2.53932034938926e-143	0.481356	0.773	0.678	5.62053166133818e-139	dementia
CTSD	4.18655175076708e-135	0.842229	0.377	0.266	9.26651364514785e-131	dementia
FOXP1	2.96859835056414e-134	0.336046	0.872	0.823	6.57069558913867e-130	dementia
IQGAP2	7.36467070226109e-130	0.914215	0.273	0.171	1.63009621323847e-125	dementia
PTPRG	3.33617004981954e-104	1.29172	0.361	0.276	7.38427878827056e-100	dementia
CCND3	5.40901782241678e-102	0.362255	0.75	0.683	1.19723200481373e-97	dementia
PRKCE	2.27764006184e-97	0.461385	0.598	0.508	5.04132851287666e-93	dementia
MYO1E	3.77137008901907e-95	0.591928	0.537	0.442	8.34755055503481e-91	dementia
ELL2	6.69614786301524e-94	0.542919	0.799	0.75	1.48212536799979e-89	dementia
SLC6A6	1.06162327293589e-88	0.572377	0.312	0.221	2.34979695231631e-84	dementia
MITF	3.25847631372428e-86	0.452768	0.523	0.43	7.21231147279732e-82	dementia
CHST15	1.32375530410838e-85	0.407595	0.585	0.495	2.9299999901135e-81	dementia
RASGRP3	2.07956864074937e-81	0.732805	0.253	0.173	4.60291722943465e-77	dementia
RESF1	2.80117910982219e-81	0.465967	0.5	0.413	6.20012984168044e-77	dementia
PPARG	1.26340364883528e-77	0.612923	0.313	0.231	2.796417636332e-73	dementia
ATG16L2	4.90824288557236e-76	0.406021	0.439	0.347	1.08639048029259e-71	dementia
MSR1	4.65042676090937e-73	0.426421	0.604	0.535	1.02932545925968e-68	dementia
SLC38A2	5.89809997520543e-72	0.41912	0.43	0.344	1.30548544851197e-67	dementia
TANC2	2.10096109677996e-71	0.28109	0.877	0.845	4.65026729161276e-67	dementia
TXNIP	1.17242021188932e-70	0.435325	0.447	0.362	2.59503489699581e-66	dementia
BNIP3L	9.72139855986959e-70	0.471882	0.481	0.396	2.15173435724154e-65	dementia
PRKCH	1.67231707916584e-69	0.341042	0.628	0.55	3.70150662302567e-65	dementia
MGAT1	3.10979729474641e-68	0.470128	0.452	0.372	6.88322533219171e-64	dementia
SDCBP	1.00042036836136e-65	0.489365	0.402	0.322	2.21433044333103e-61	dementia
DTNA	2.04623241744345e-65	0.270638	0.816	0.777	4.52913083276932e-61	dementia
STARD13	4.92673292784948e-65	0.476232	0.551	0.482	1.0904830662502e-60	dementia
HP1BP3	9.17144277875841e-65	0.278197	0.647	0.569	2.03000714465039e-60	dementia
GAB1	8.47863294684436e-64	0.370755	0.56	0.485	1.87666061645453e-59	dementia
SNCA	5.19401133203709e-63	0.342085	0.562	0.486	1.14964246823309e-58	dementia
ANAPC16	3.33997713195093e-62	0.290419	0.556	0.472	7.39270538386018e-58	dementia
PIK3IP1	2.37630385316981e-59	0.477114	0.292	0.219	5.25971094860607e-55	dementia
SPP1	7.24085323174669e-59	0.471061	0.823	0.794	1.60269045431481e-54	dementia
ALCAM	7.29229657230126e-59	0.408316	0.526	0.454	1.61407692331316e-54	dementia
LINC00486	6.31734636479179e-58	0.289603	0.545	0.458	1.39828144438301e-53	dementia
ARID5B	1.97465846738886e-55	0.506598	0.383	0.308	4.37070905171849e-51	dementia
ATP1B3	4.54650440866213e-55	0.551344	0.368	0.295	1.00632328581328e-50	dementia
TNPO1	5.55525714254807e-55	0.319276	0.552	0.48	1.22960061593159e-50	dementia
FNDC3B	7.8040176400855e-54	0.273658	0.74	0.685	1.72734126445652e-49	dementia
UBXN2B	2.59555040907157e-53	0.417487	0.46	0.391	5.74499127543902e-49	dementia
CPM	2.60915597490611e-53	0.412268	0.504	0.433	5.77510583485719e-49	dementia
PILRA	2.73473640133545e-52	0.315017	0.47	0.393	6.05306555071589e-48	dementia
GTDC1	3.64234683601076e-52	0.302745	0.643	0.582	8.06197048682622e-48	dementia
ABCA1	1.52721429197166e-51	0.342056	0.451	0.376	3.38033611385007e-47	dementia
SAMD4A	2.15064458471842e-51	0.367108	0.482	0.412	4.76023672381575e-47	dementia
PRKAG2	6.86573610225633e-51	0.300935	0.774	0.735	1.51966202887342e-46	dementia
ZBTB1	9.96052689449786e-50	0.318221	0.457	0.383	2.20466302282816e-45	dementia
PTK2B	1.29579663613311e-48	0.359153	0.478	0.408	2.86811627441703e-44	dementia
NAMPT	2.59968200867027e-47	0.81333	0.262	0.203	5.75413615799078e-43	dementia
LRRK2	2.37429911715889e-46	0.380386	0.526	0.465	5.25527366591949e-42	dementia
FNDC3A	7.31441841157882e-46	0.309775	0.726	0.679	1.61897337121886e-41	dementia
P2RX7	1.27784445071775e-45	0.266824	0.553	0.482	2.82838090721866e-41	dementia
HIF1A	8.46367110961308e-45	0.400257	0.736	0.697	1.87334896340176e-40	dementia
ARHGAP6	2.5349409655813e-43	0.271473	0.745	0.701	5.61083833321764e-39	dementia
ATP6V1B2	1.2531037170884e-42	0.27839	0.474	0.402	2.77361976740346e-38	dementia
SNX27	3.85314483150042e-42	0.284268	0.495	0.429	8.52855077004304e-38	dementia
CYP27A1	9.97448607877681e-42	0.483065	0.261	0.203	2.20775274867646e-37	dementia
TMEM51	1.43328882502185e-41	0.386243	0.392	0.327	3.17244148530336e-37	dementia
CREBRF	2.67902772724029e-41	0.30182	0.444	0.378	5.92975997147366e-37	dementia
MALT1	3.89200030170086e-41	0.433494	0.368	0.303	8.61455346778469e-37	dementia
SESN1	1.15274475373906e-40	0.270945	0.534	0.47	2.55148523792603e-36	dementia
GABPB1-AS1	1.17639386029948e-38	0.33084	0.322	0.26	2.60383017038686e-34	dementia
KLHL24	1.39545569280908e-38	0.312154	0.406	0.343	3.08870163046361e-34	dementia
CHPT1	2.00962449293218e-38	0.34563	0.392	0.332	4.44810285265608e-34	dementia
APOE	1.39299291238135e-37	0.282988	0.673	0.628	3.08325051226489e-33	dementia
DENND4C	8.82502836887902e-37	0.253872	0.543	0.48	1.95333177916768e-32	dementia
SH3RF1	9.32117563723806e-37	0.328493	0.43	0.369	2.06314901554627e-32	dementia
SLC35E3	9.3874995901081e-37	0.401626	0.265	0.21	2.07782915927453e-32	dementia
RGS1	3.28349827119147e-36	0.369438	0.407	0.347	7.2676950734552e-32	dementia
PER1	3.3090797279309e-35	0.401811	0.252	0.198	7.32431706980226e-31	dementia
ASAH1	6.7849295306721e-35	0.264244	0.533	0.475	1.50177630231896e-30	dementia
WNT2B	1.74368347682394e-34	0.322748	0.358	0.299	3.85946900760211e-30	dementia
ARHGAP18	2.19104205620132e-34	0.337624	0.42	0.365	4.84965248719601e-30	dementia
NPIPB5	3.45781471391235e-34	0.306929	0.279	0.222	7.6535270877736e-30	dementia
PKM	5.20954973279882e-34	0.337516	0.359	0.303	1.15308173785769e-29	dementia
ZHX2	6.74702634398824e-33	0.372796	0.316	0.262	1.49338681097836e-28	dementia
CTSH	3.9130462351839e-32	0.271372	0.338	0.279	8.66113653695603e-28	dementia
CLN8	1.87614672690461e-31	0.303883	0.342	0.287	4.15266316533066e-27	dementia
MPRIP	1.99256769013298e-31	0.254599	0.449	0.391	4.41034932534033e-27	dementia
CD163	2.72157813823312e-31	0.312367	0.406	0.352	6.02394105116519e-27	dementia
PCSK5	3.003515193151e-31	0.453207	0.268	0.219	6.64798052852042e-27	dementia
PADI2	7.30672821930437e-31	0.342995	0.563	0.51	1.61727122406083e-26	dementia
APOC1	8.35093273802128e-31	0.401191	0.289	0.239	1.84839545223363e-26	dementia
TNFAIP8	1.09128924391227e-30	0.33655	0.331	0.277	2.41545961247541e-26	dementia
PIK3CA	1.14197030353809e-30	0.270742	0.438	0.385	2.52763706985121e-26	dementia
ERGIC1	5.82589193948973e-30	0.276664	0.454	0.399	1.28950292188666e-25	dementia
FAM13A	1.17172562376626e-29	0.266922	0.797	0.775	2.59349749564424e-25	dementia
AGPAT5	3.2685020519991e-29	0.307533	0.309	0.257	7.23450244189481e-25	dementia
PDLIM5	1.09933066254004e-28	0.345027	0.269	0.22	2.43325848846613e-24	dementia
PPP1CB	4.88417713684679e-28	0.26515	0.453	0.397	1.08106376746967e-23	dementia
IQGAP1	1.54094109773755e-27	0.29523	0.325	0.275	3.4107190257323e-23	dementia
KLF7	1.57587401764398e-27	0.270764	0.361	0.309	3.48803955065319e-23	dementia
ERO1A	2.70376877549986e-27	0.403716	0.251	0.205	5.98452180769139e-23	dementia
NEK10	2.90357497433761e-27	0.382652	0.268	0.222	6.42677284819887e-23	dementia
EAF2	6.59029700872719e-27	0.250252	0.313	0.261	1.45869633991168e-22	dementia
GYPC	1.23542661859251e-26	0.258056	0.292	0.241	2.73449327759267e-22	dementia
PDK1	1.4011314167294e-26	0.359079	0.273	0.227	3.10126427778885e-22	dementia
KDM3A	1.46344229377057e-26	0.303778	0.328	0.278	3.23918317303179e-22	dementia
SMS	2.82269050914579e-26	0.263672	0.325	0.274	6.24774317294329e-22	dementia
SHMT1	6.47074183634953e-26	0.275492	0.292	0.242	1.43223399805761e-21	dementia
ITPKB	1.43572311810568e-25	0.26117	0.376	0.326	3.17782954961512e-21	dementia
GK	1.48058538013559e-25	0.338315	0.3	0.252	3.27712768039211e-21	dementia
HBP1	1.69839396667396e-25	0.266176	0.306	0.256	3.75922520583615e-21	dementia
CXCL16	2.13031076364564e-25	0.320239	0.259	0.213	4.71522984425326e-21	dementia
GSE1	2.34589696996137e-25	0.250037	0.333	0.283	5.19240835331249e-21	dementia
SERTAD2	3.56860544165883e-25	0.272001	0.347	0.297	7.89875128456766e-21	dementia
KLHL6	3.59648970084993e-25	0.332087	0.394	0.347	7.96047030386124e-21	dementia
CREG1	3.72637922794724e-25	0.282614	0.363	0.314	8.24796778313842e-21	dementia
RNF144B	4.1615528635302e-25	0.385918	0.462	0.419	9.21118110813775e-21	dementia
ENO1	1.44748260931164e-23	0.345084	0.279	0.235	3.20385800745038e-19	dementia
CADM1	2.34426098401669e-23	0.422345	0.278	0.237	5.18878726202255e-19	dementia
PGK1	3.69494607072868e-23	0.390632	0.37	0.328	8.17839363295085e-19	dementia
SEM1	8.63145825264741e-23	0.274274	0.314	0.269	1.91048696964098e-18	dementia
SLC18B1	1.15739502600522e-22	0.261548	0.3	0.255	2.56177815055995e-18	dementia
GBE1	2.94947328409214e-22	0.495558	0.404	0.364	6.52836416700955e-18	dementia
ITSN1	5.07200842918861e-22	0.310224	0.349	0.304	1.12263834571661e-17	dementia
PDE8A	7.7710384348935e-22	0.252951	0.552	0.512	1.72004164717933e-17	dementia
HPCAL1	1.85910875005326e-21	0.328675	0.293	0.251	4.11495130736788e-17	dementia
MCTP1	3.96529249747379e-21	0.344104	0.315	0.274	8.77677841390849e-17	dementia
GNA13	5.00415161759374e-21	0.463898	0.507	0.467	1.1076189190382e-16	dementia
RASSF3	6.31227840833852e-21	0.276786	0.403	0.358	1.39715970290165e-16	dementia
AGO2	8.92976225392192e-21	0.258037	0.285	0.242	1.97651357728308e-16	dementia
SERINC5	1.21846296347834e-20	0.282222	0.271	0.229	2.69694592336296e-16	dementia
PHLPP1	2.99210617408103e-20	0.290264	0.265	0.225	6.62272780571094e-16	dementia
IGF1R	3.06095623932929e-20	0.263015	0.346	0.303	6.77512054013145e-16	dementia
HSP90AA1	5.37309855502843e-20	0.253262	0.536	0.475	1.18928163416999e-15	dementia
CYRIA	8.21082689223239e-20	0.273628	0.492	0.455	1.81738442432672e-15	dementia
HLA-A	1.05565425523525e-19	0.308422	0.302	0.263	2.3365851285377e-15	dementia
GRN	1.1392412112802e-19	0.298963	0.283	0.244	2.5215964970476e-15	dementia
MEGF9	1.34666450994382e-19	0.295105	0.286	0.247	2.98070722630966e-15	dementia
NR6A1	6.65452221732035e-19	0.297254	0.274	0.235	1.47291194758169e-14	dementia
SH3PXD2B	7.07042915740105e-19	0.286915	0.276	0.236	1.56496878969915e-14	dementia
THRB	2.14357787011722e-18	0.276929	0.403	0.366	4.74459525771745e-14	dementia
NGLY1	3.28124905311569e-18	0.289121	0.355	0.315	7.26271665416627e-14	dementia
MOB3B	6.41467249691197e-18	0.336996	0.253	0.216	1.41982361046649e-13	dementia
ZNF804A	2.84837774812756e-17	0.302718	0.296	0.259	6.30459930770553e-13	dementia
PAPOLG	2.41814154971732e-16	0.282392	0.312	0.273	5.35231450614431e-12	dementia
DUSP16	6.07207937897839e-16	0.307496	0.321	0.286	1.34399404974308e-11	dementia
LIMD1	7.89257148287618e-16	0.283645	0.323	0.287	1.74694177201981e-11	dementia
FAM110B	3.99978136998853e-15	0.346965	0.294	0.259	8.85311608433261e-11	dementia
ESYT2	1.02686204570875e-14	0.36804	0.309	0.277	2.27285645197175e-10	dementia
GNA12	3.0783449149756e-13	0.362252	0.322	0.29	6.813608634807e-09	dementia
SYTL3	2.06296140680459e-11	0.39683	0.348	0.32	4.56615877782128e-07	dementia
HK2	1.24310727580832e-10	0.275476	0.342	0.315	2.75149364427414e-06	dementia
ZNF331	3.84784613082266e-09	0.399529	0.258	0.234	8.51682262596287e-05	dementia
HIF1A-AS3	0.000654124	0.366337	0.28	0.268	1	dementia

## Sheet: Micro_high_vs_mid
DEGs (log2FC>0.25 and p value<0.05) found in human microglial cells between individuals during late stages of progression (high vs mid Braak stages)
	p_val	avg_log2FC	pct.1	pct.2	p_val_adj
MT-ND3	0	1.67583	0.644	0.414	0
MT-CYB	0	1.49721	0.59	0.363	0
MT-ATP6	0	1.5489	0.634	0.408	0
MT-ND1	0	1.48007	0.503	0.286	0
MT-ND4	0	1.33292	0.637	0.424	0
MT-ND2	0	1.29977	0.521	0.309	0
MT-CO2	0	1.2636	0.696	0.511	0
MT-CO3	0	1.16854	0.708	0.542	0
FKBP5	0	0.401143	0.986	0.933	0
MT-ATP8	1.49750595248537e-203	1.56038	0.223	0.095	3.31457967523113e-199
MT-CO1	5.94400105031039e-201	0.717239	0.627	0.489	1.3156451924757e-196
MT-ND5	1.37086571922207e-196	1.07074	0.347	0.199	3.03427418292612e-192
NHSL1	6.80797965099343e-168	0.766533	0.684	0.577	1.50687821595089e-163
MT-ND4L	1.29317520601312e-151	1.13317	0.239	0.123	2.86231400098944e-147
DPYD	1.83138888180097e-151	0.496763	0.811	0.722	4.05359615097827e-147
ADGRG7	1.8087987662889e-148	-5.39204	0.001	0.037	4.00359518930384e-144
LINC02397	2.60166846979957e-141	1.30394	0.188	0.087	5.75853299105436e-137
CD83	4.38040051698577e-129	-1.70164	0.1	0.189	9.69557850429631e-125
PTPRG	3.41652972166837e-124	1.24836	0.363	0.255	7.56214688594077e-120
CCND3	1.24467095756917e-119	0.39049	0.762	0.664	2.7549546974836e-115
LINC00486	3.22393448428169e-104	0.526378	0.539	0.429	7.13585658750909e-100
MALAT1	1.24575858240689e-103	-0.374444	1	1	2.7573620462994e-99
CHI3L1	3.06837100145968e-100	1.98431	0.092	0.031	6.79153237463085e-96
CSGALNACT1	5.93844422491729e-94	0.338226	0.918	0.879	1.31441524474319e-89
FOXP1	1.0583294115397e-85	0.261018	0.884	0.826	2.34250631950198e-81
CPM	7.67741462076727e-85	0.53288	0.513	0.414	1.69931895216063e-80
CTSD	5.92356226803299e-84	0.76565	0.361	0.268	1.31112127240642e-79
IQGAP2	1.71078478416702e-82	0.769471	0.265	0.175	3.78665104127527e-78
RESF1	2.09637865089917e-80	0.505348	0.497	0.405	4.64012450590022e-76
MKNK1	5.82897625728764e-79	-0.313803	0.719	0.768	1.29018560478805e-74
LINC02211	4.00296069599248e-77	-2.49979	0.008	0.036	8.86015320450976e-73
FMN1	4.79501886980635e-77	0.213691	0.937	0.89	1.06132947664294e-72
LNCAROD	1.22710861779047e-76	0.278738	0.889	0.847	2.71608221461742e-72
KIF5C-AS1	1.17728371146134e-73	-1.48161	0.034	0.079	2.60579976694853e-69
DST	2.36640165903122e-73	0.232189	0.843	0.774	5.2377934320997e-69
TLE1-DT	1.52247294072434e-72	1.17467	0.106	0.049	3.36984160699926e-68
DOCK4	1.0057401671071e-71	-0.197282	0.999	1	2.22610528587485e-67
XIST	6.4067365335759e-71	0.269274	0.699	0.597	1.41806706434169e-66
ATP8B4	1.12483195695137e-69	-0.208076	0.949	0.969	2.48970305351616e-65
CH25H	2.88340283955717e-68	-1.10628	0.045	0.093	6.38212384507585e-64
PRKCE	3.57429064356949e-68	0.374037	0.588	0.501	7.91133491047672e-64
AHNAK	9.10408945646181e-67	1.1401	0.096	0.044	2.01509916029326e-62
LINC02712	5.73300546503983e-65	-0.543318	0.265	0.349	1.26894342963192e-60
DTNA	8.98720592766735e-63	0.259927	0.818	0.759	1.98922816002989e-58
ZBTB16	1.05823121013982e-62	0.270385	0.687	0.604	2.34228896052348e-58
IPCEF1	1.32713148705418e-62	-0.23295	0.806	0.863	2.93747283344572e-58
CYP27A1	1.65168570323017e-62	0.595463	0.267	0.188	3.65584113552965e-58
ELMO1	2.59416643580513e-62	0.180114	0.997	0.995	5.74192798901107e-58
TXNIP	1.01465560381994e-61	0.43988	0.443	0.356	2.24583871349506e-57
RNF150	1.51145370477377e-60	0.34348	0.621	0.542	3.34545163014627e-56
PELI1	8.8443142593774e-60	0.234809	0.831	0.778	1.95760051817059e-55
LINC01736	2.11394395111863e-59	0.615993	0.228	0.155	4.67900354140597e-55
SNCA	1.45688596530868e-58	0.350052	0.555	0.472	3.22467139561424e-54
ALOX15B	4.2964724292208e-57	0.674116	0.162	0.099	9.50981207483732e-53
STARD13	1.41176807600973e-56	0.448706	0.556	0.482	3.12480745943993e-52
GPCPD1	4.78775948042147e-55	-0.327013	0.518	0.59	1.05972268339649e-50
TNFRSF11B	1.04086544395499e-53	1.84869	0.047	0.015	2.30385157364998e-49
KCNQ3	1.1656293143012e-53	-0.219362	0.923	0.94	2.58000392427427e-49
NCKAP5	1.86950159079373e-53	-0.307006	0.597	0.659	4.13795482106285e-49
HIF1A-AS3	5.77183101886531e-53	-0.696437	0.242	0.311	1.27753707771565e-48
WNT2B	1.65384606226831e-52	0.438418	0.357	0.277	3.66062287422468e-48
PRKCA	8.17654568643789e-52	-0.199296	0.785	0.827	1.80979662223616e-47
UTY	1.17929705567784e-50	-0.54064	0.183	0.251	2.61025610303734e-46
TLN2	6.02747458729051e-50	-0.288884	0.582	0.644	1.33412122515088e-45
OLR1	1.59360000951935e-49	-0.601937	0.344	0.407	3.52727426107012e-45
SRGAP2	5.0397776977888e-49	-0.131117	0.995	0.994	1.11550439562857e-44
NFKBIA	1.2286702792933e-48	0.545044	0.237	0.17	2.7195387961878e-44
LINC00278	1.64655014877129e-48	-0.516523	0.15	0.213	3.64447409929037e-44
DSCAM	3.70899231730859e-48	0.251453	0.706	0.629	8.20948359513082e-44
SLC1A3	4.68183647878603e-48	0.128442	0.996	0.993	1.0362776862145e-43
DENND3	5.26538831107423e-48	-0.208017	0.909	0.927	1.16544104877317e-43
PAX8-AS1	1.24402116483822e-47	0.497257	0.223	0.157	2.75351644625292e-43
S100A4	2.09731719589022e-46	1.91575	0.037	0.011	4.64220188138341e-42
SRGAP1	5.76188502628377e-46	0.173057	0.899	0.868	1.27533563171765e-41
PIK3IP1	9.63339324027935e-46	0.453666	0.286	0.216	2.13225525980343e-41
ZFP36L2	1.55682428985354e-45	0.250273	0.643	0.569	3.44587488316183e-41
GSN	6.4690798905774e-45	0.229064	0.701	0.641	1.4318661429804e-40
FTH1	9.12612624181e-45	-0.484342	0.54	0.6	2.01997678236223e-40
CAPZB	2.20425408108646e-44	-0.21992	0.88	0.892	4.87889598307678e-40
TANC2	2.95872415195934e-44	0.218074	0.878	0.842	6.54884003794679e-40
ATG16L2	7.42105173843291e-44	0.369435	0.425	0.354	1.64257559178474e-39
UTRN	8.06820150346848e-44	0.206201	0.762	0.702	1.78581572077771e-39
SLC8A1	3.00438350770326e-43	-0.150569	0.979	0.986	6.6499024559504e-39
NR4A1	6.7488272053566e-43	-1.45323	0.02	0.047	1.49378541363363e-38
PRKCH	7.30075846350318e-43	0.26331	0.617	0.551	1.61594987831179e-38
WSB1	1.68683789604298e-42	-0.243227	0.738	0.771	3.73364699910153e-38
PFKFB3	2.29889519116792e-42	-0.263856	0.592	0.647	5.08837461613108e-38
IL13RA1	3.9842381560164e-42	0.227689	0.687	0.624	8.81871273452669e-38
RALGAPA2	2.65617694820903e-41	0.265194	0.735	0.685	5.87918205716586e-37
ITGAM	3.51137099901387e-41	-0.302301	0.445	0.512	7.7720685692173e-37
BCAT1	4.3817073304812e-41	-0.416981	0.342	0.405	9.69847100528709e-37
CPA6	5.34520841664147e-41	0.710967	0.202	0.146	1.18310843093942e-36
CACNA1A	1.02250072923402e-40	0.2427	0.697	0.638	2.26320311408658e-36
APBB1IP	1.99314015448247e-40	-0.140519	0.98	0.984	4.4116164179315e-36
ZSWIM6	3.35215121713137e-40	-0.150869	0.964	0.973	7.41965150399857e-36
TBC1D22A	1.00811287996564e-39	-0.171757	0.965	0.971	2.23135704851594e-35
SORL1	1.02834454948497e-39	-0.159602	0.973	0.978	2.27613782583002e-35
SLA	1.07864111247983e-39	0.20083	0.697	0.628	2.38746423836286e-35
GNA13	1.93846544370862e-39	-0.511437	0.473	0.526	4.29059941310466e-35
HS3ST4	2.66908703436021e-39	0.184764	0.873	0.826	5.90775724185289e-35
METTL7A	3.5105030221599e-39	0.396738	0.35	0.284	7.77014738924872e-35
DOC2A	3.8639280517629e-39	0.591074	0.173	0.12	8.55241834977201e-35
DIRC3	9.19929972154812e-39	0.671284	0.236	0.179	2.03617300036746e-34
LSP1	1.02516466349725e-38	0.974435	0.074	0.039	2.2690994661848e-34
MIR4300HG	1.2290840542351e-38	-2.11417	0.03	0.059	2.72045464564396e-34
SPON1	1.28634504323868e-38	1.05053	0.092	0.053	2.84719611870448e-34
CLEC2D	1.6458154964436e-38	0.357565	0.42	0.356	3.64284801982826e-34
CCDC40	6.18953506106987e-38	0.478804	0.217	0.16	1.3699916904172e-33
SEMA3E	7.54072558989055e-38	0.956442	0.077	0.041	1.66906420206637e-33
TLR2	7.69693345945054e-38	0.143147	0.861	0.81	1.70363925191478e-33
NPIPB5	1.43533520249556e-37	0.403121	0.273	0.211	3.17697093720368e-33
SLC38A2	1.83088878563096e-37	0.336574	0.414	0.348	4.05248923811556e-33
ANKRD11	4.81854992420256e-37	-0.172815	0.886	0.904	1.06653784022299e-32
EYA2	5.29301795161464e-37	0.908616	0.093	0.054	1.17155659341038e-32
HSPA1B	6.79078648847497e-37	-0.428286	0.227	0.287	1.50307268135905e-32
ARL17B	9.57063283028324e-37	0.346111	0.325	0.26	2.11836387065489e-32
HCLS1	3.05071540609542e-36	0.182529	0.77	0.718	6.7524534798516e-32
KCTD12	2.05858405845272e-35	0.269526	0.539	0.478	4.55646995497926e-31
GNG2	2.25170535324798e-35	0.373408	0.343	0.282	4.98392462887908e-31
SPATA13	2.44351544105085e-35	-0.218021	0.654	0.702	5.40847707722196e-31
LINC01909	3.938512160592e-35	0.499217	0.202	0.149	8.71750281625433e-31
LRRK2	5.68932162887825e-35	0.343845	0.524	0.469	1.25927444933591e-30
PTPRJ	7.31390304272877e-35	-0.155406	0.95	0.962	1.61885929947759e-30
CELF2	7.35074592543885e-35	0.12419	0.998	0.997	1.62701410313663e-30
PTMS	1.40780757346063e-34	0.660977	0.12	0.078	3.11604128309776e-30
SERPINE1	1.41813829995986e-34	0.435184	0.125	0.081	3.13890731313116e-30
PPP1R12A	2.09988831162549e-34	0.223706	0.72	0.671	4.64789278895186e-30
USP15	2.46691790394906e-34	0.151525	0.904	0.881	5.46027608860086e-30
GAB1	2.6336211853456e-34	0.273516	0.554	0.493	5.82925713164395e-30
PTPRE	2.93513986867307e-34	-0.179682	0.921	0.933	6.49663858532097e-30
TNPO1	3.9023742328566e-34	0.275756	0.542	0.483	8.6375151270048e-30
RANBP3L	5.2488419262501e-34	2.33852	0.04	0.016	1.1617786719562e-29
ARHGAP24	1.12158424206372e-33	0.115786	0.995	0.995	2.48251456138383e-29
TOX2	1.88428785880691e-33	0.980146	0.063	0.033	4.17068274668322e-29
GRB2	2.49577242487119e-33	-0.215103	0.838	0.858	5.5241426852099e-29
RBMS3	2.60779575121521e-33	0.825163	0.236	0.183	5.77209511573975e-29
TSC22D3	4.47354757957505e-33	0.463747	0.193	0.142	9.90175021263141e-29
PRKY	7.81005202506265e-33	-0.522261	0.115	0.16	1.72867691522737e-28
MPRIP	2.9417838096633e-32	0.272341	0.443	0.379	6.51134428430875e-28
SAP30	5.80061814687883e-32	0.467954	0.177	0.129	1.28390882063016e-27
HGF	6.57690536766173e-32	0.608817	0.146	0.102	1.45573223407825e-27
ZFY	9.13924630417252e-32	0.516603	0.144	0.1	2.02288077696554e-27
ARHGAP17	1.18589802384837e-31	-0.287426	0.418	0.475	2.62486668598599e-27
HIVEP3	1.39256476009893e-31	-0.229877	0.731	0.766	3.08230284000298e-27
HP1BP3	2.02060628058979e-31	0.219198	0.633	0.579	4.47240994145745e-27
MEF2A	2.06025273292672e-31	-0.110814	0.997	0.999	4.56016339906001e-27
ADARB2	2.93678633930928e-31	0.420525	0.214	0.163	6.50028288342717e-27
ESRP1	5.24088873640567e-31	1.77755	0.025	0.007	1.16001831291603e-26
OXR1	7.41256946922771e-31	0.17672	0.915	0.897	1.64069812631886e-26
CTTNBP2	1.68409902546743e-30	0.183481	0.787	0.744	3.72758478296961e-26
RASA3	1.69969785741445e-30	-0.301604	0.449	0.499	3.76211123760115e-26
USP9Y	1.9563338205369e-30	-0.421225	0.169	0.22	4.33014927837636e-26
GAS7	2.106607782009e-30	0.194382	0.495	0.429	4.66276566469872e-26
MS4A7	2.49474462989436e-30	0.284804	0.522	0.469	5.52186776380817e-26
TTTY14	3.00006053261515e-30	-0.509082	0.141	0.187	6.64033398289037e-26
HSPA1A	4.5530035680994e-30	-0.327796	0.334	0.388	1.00776180976312e-25
LINC02899	5.50504487630564e-30	-0.997771	0.054	0.085	1.21848663292149e-25
RASSF4	7.64985955859184e-30	0.213607	0.551	0.488	1.69321991469872e-25
SH3RF1	8.09490998180863e-30	0.318298	0.424	0.366	1.79172737537352e-25
EMP2	1.18303207347018e-29	0.78269	0.073	0.042	2.61852319141889e-25
MS4A14	1.94088238965831e-29	0.35888	0.245	0.192	4.29594908126969e-25
MYBPH	2.84908680670511e-29	2.58899	0.015	0.002	6.30616873796109e-25
EGR3	2.89336926488131e-29	-1.61373	0.011	0.028	6.4041835308883e-25
GPNMB	3.9206804753496e-29	0.630797	0.159	0.115	8.6780341641388e-25
NUDT16-DT	4.14350737095253e-29	0.311956	0.369	0.312	9.17123921486633e-25
SLC9A7	5.02635513418468e-29	0.497137	0.155	0.112	1.11253344540044e-24
GABPB1-AS1	6.43316309828026e-29	0.310825	0.313	0.255	1.42391632017335e-24
SLC35E3	1.13733957258249e-28	0.400927	0.262	0.209	2.51738740995408e-24
GRIN1	1.25235336164361e-28	0.386877	0.248	0.196	2.77195893066197e-24
CD302	1.66912589192159e-28	0.260644	0.443	0.383	3.69444324917925e-24
DPEP2	2.03805415847051e-28	0.500728	0.156	0.113	4.51102907435862e-24
ADAM7-AS1	3.29565129750099e-28	-0.342331	0.421	0.466	7.29459458188869e-24
RPS26	3.53935819764902e-28	0.444353	0.2	0.153	7.83401543467634e-24
POTEG	3.59507491817126e-28	1.30224	0.032	0.013	7.95733882388027e-24
LYN	6.71428098503883e-28	-0.186714	0.906	0.917	1.48613895322849e-23
LINC00355	8.32357659035512e-28	-2.81018	0.004	0.016	1.8423404425092e-23
CKLF	8.56534546962498e-28	0.259536	0.458	0.399	1.89585356624679e-23
LINC02057	1.17567533132653e-27	-0.472088	0.125	0.168	2.60223977835814e-23
BIN1	1.71667544341731e-27	-0.194063	0.531	0.585	3.79968942645987e-23
P2RY8	2.55119476288913e-27	0.641836	0.097	0.063	5.64681448817881e-23
SFMBT2	2.92573859226021e-27	-0.183132	0.988	0.987	6.47582980010875e-23
JADE2	3.75710722882816e-27	0.365567	0.24	0.19	8.31598114028825e-23
LPAR1	4.06429190298803e-27	-0.285107	0.391	0.445	8.9959036980737e-23
PTPN14	4.15089024039099e-27	-0.427445	0.16	0.205	9.18758045808142e-23
SESN1	7.30145389280655e-27	0.23744	0.53	0.476	1.6161038046338e-22
GPM6A	8.22589340655696e-27	0.203591	0.415	0.353	1.82071924660732e-22
DAB2IP	8.36786325447636e-27	0.670438	0.095	0.062	1.8521428527458e-22
ST6GAL1	8.7720667160955e-27	-0.128235	0.983	0.988	1.94160924694058e-22
CLNK	9.0228881257528e-27	1.25181	0.034	0.014	1.99712605775413e-22
NRP1	9.84302519232707e-27	0.340794	0.394	0.342	2.17865519606967e-22
UST	1.70269365095551e-26	-0.261687	0.382	0.44	3.76874212702494e-22
SLC26A3	2.05545806930833e-26	1.02013	0.043	0.021	4.54955089060706e-22
ADAMTS2	3.04939486437756e-26	1.2678	0.042	0.021	6.74953059281329e-22
PRKAG2	3.10328911354156e-26	0.187323	0.776	0.734	6.86882012391289e-22
GRN	4.22106172398344e-26	0.369029	0.285	0.235	9.34289801986495e-22
ARHGAP9	5.2598943267063e-26	0.458008	0.175	0.132	1.16422501027317e-21
RUNX1	5.39657772412725e-26	0.157174	0.972	0.968	1.19447851345833e-21
ZBTB20	5.53356736947165e-26	0.141556	0.89	0.86	1.22479980155886e-21
SRRM2	5.71540320065271e-26	0.186873	0.641	0.59	1.26504734443247e-21
AKR1B1	9.65619399403189e-26	0.394651	0.218	0.171	2.13730197863902e-21
A2M	1.13808209682755e-25	-0.237478	0.698	0.729	2.5190309131181e-21
RASGRP3	1.184931705158e-25	0.429369	0.237	0.19	2.62272783619673e-21
CALCRL-AS1	1.93034895102261e-25	0.901457	0.054	0.03	4.27263436819344e-21
B3GNT5	2.31669290231317e-25	-0.303094	0.418	0.466	5.12776806997998e-21
ZNF385D	2.83420878290038e-25	0.388692	0.205	0.158	6.27323772007171e-21
SLC38A4-AS1	2.8587450048518e-25	0.430013	0.236	0.189	6.32754619373897e-21
PLXNC1	3.05287066407708e-25	0.496008	0.205	0.161	6.75722392786821e-21
RNASE1	3.18528118489848e-25	-0.715331	0.036	0.06	7.0503013746543e-21
SLC6A6	3.70499511101684e-25	0.3438	0.285	0.236	8.20063617872467e-21
RMRP	4.01922634354156e-25	0.63347	0.112	0.078	8.89615558879489e-21
ARHGAP15	4.24540031764082e-25	0.130293	0.975	0.969	9.39676906306619e-21
EEPD1	6.2659278756618e-25	-0.462053	0.198	0.243	1.38690047599898e-20
LINC01320	8.59365569786515e-25	0.651929	0.074	0.046	1.90211975216547e-20
TYMP	1.01838875394436e-24	-0.370099	0.272	0.32	2.25410166798044e-20
IFNLR1	1.02807335945218e-24	0.467096	0.142	0.103	2.27553757381146e-20
SLC29A1	1.27716898930254e-24	0.457294	0.172	0.13	2.82688584092224e-20
FAM135A	1.58860991717484e-24	0.162261	0.762	0.724	3.5162291906748e-20
TBC1D16	1.68885566183385e-24	0.20369	0.503	0.445	3.73811312190305e-20
PLB1	1.88773423999782e-24	-0.330731	0.277	0.325	4.17831096681119e-20
PDLIM5	2.00215151598376e-24	0.353119	0.265	0.217	4.43156216547845e-20
MCF2L2	2.00402675198325e-24	-0.426849	0.279	0.323	4.43571281283973e-20
HNMT	2.56458280320831e-24	0.293024	0.321	0.269	5.67644757662128e-20
NABP1	2.57628075591782e-24	0.255793	0.38	0.326	5.70233982514851e-20
NR4A3	2.62903076515433e-24	-1.34228	0.017	0.034	5.8190966955926e-20
TMEM163	2.93083416331507e-24	-0.23307	0.439	0.487	6.48710833708157e-20
ABCA7	3.65439568340649e-24	0.631315	0.088	0.058	8.08863940565192e-20
RTN1	4.4703893956066e-24	0.509093	0.278	0.233	9.89475988823566e-20
ZNF846	5.27845844849905e-24	0.228879	0.551	0.501	1.16833399299078e-19
MIR646HG	7.42923898445487e-24	-0.203396	0.652	0.689	1.64438775681924e-19
LAPTM5	1.62151820556496e-23	0.210284	0.618	0.574	3.58906839619749e-19
B4GALT1	1.878572656188e-23	-0.289181	0.486	0.524	4.15803271720653e-19
LTA4H	3.08677381602441e-23	0.390625	0.19	0.148	6.83226516438844e-19
NEK10	3.39649659684798e-23	0.366951	0.268	0.221	7.51780556746333e-19
DRAM1	3.40519431210762e-23	0.579346	0.141	0.104	7.537057090419e-19
WASHC1	3.91467382123696e-23	0.354608	0.251	0.205	8.66473903592589e-19
SLC11A1	4.12397234305908e-23	-0.362968	0.629	0.638	9.12800038412697e-19
MYO1G	4.35332181751664e-23	-0.710954	0.052	0.079	9.63564251089133e-19
TNFRSF1B	5.68872788962231e-23	-0.277659	0.604	0.63	1.259143031089e-18
CMTM1	7.06125764999531e-23	0.371993	0.197	0.155	1.56293876824996e-18
KLF7	7.3435806931217e-23	0.276691	0.363	0.312	1.62542815061556e-18
NAV3	7.90222829829335e-23	-0.118291	0.913	0.936	1.74907921154425e-18
TLR7	8.75588549501712e-23	0.316859	0.244	0.198	1.93802769546709e-18
FRMD4B	8.9118773055782e-23	0.145364	0.837	0.809	1.97255492281668e-18
BAG3	9.14198970106431e-23	-0.773045	0.071	0.1	2.02348800043357e-18
DNAJB1	1.15122007720428e-22	-0.808029	0.088	0.119	2.54811051888394e-18
ANAPC16	1.22221575238753e-22	0.199009	0.537	0.488	2.70525234633456e-18
PPP1R15A	1.50675490212375e-22	-0.842535	0.036	0.059	3.33505130036071e-18
OSBPL3	1.58385250121262e-22	0.17293	0.711	0.672	3.50569912618401e-18
RAB1A	1.97987121739252e-22	-0.155165	0.754	0.779	4.3822469525766e-18
NUP50-DT	2.19502092449921e-22	0.306713	0.249	0.203	4.85845931428656e-18
TSHR	2.45324041577588e-22	0.516846	0.156	0.118	5.43000233627832e-18
HLA-DRB5	3.21664014540724e-22	-0.351037	0.224	0.268	7.11971129784439e-18
ST18	3.68646461285441e-22	0.580579	0.115	0.082	8.15962077409195e-18
FADS3	6.26657692232889e-22	0.488403	0.099	0.068	1.38704413598828e-17
TMEM65	7.17088237137922e-22	0.208507	0.546	0.497	1.58720310408108e-17
KDM5D	1.03968604071808e-21	-0.52959	0.058	0.086	2.3012410825254e-17
C5	1.12317636965741e-21	0.59589	0.098	0.068	2.48603857659972e-17
MB21D2	1.36909835757297e-21	-0.425129	0.208	0.251	3.03036230465201e-17
FXYD5	1.49204851354489e-21	0.394272	0.16	0.122	3.30250017988026e-17
TMEM14B	1.5677172791004e-21	0.230814	0.399	0.349	3.46998542556082e-17
TRAF3	1.67595965395404e-21	-0.268619	0.399	0.446	3.70956909806187e-17
LINC00558	1.76848358958227e-21	1.25071	0.027	0.011	3.91436157718139e-17
ARHGAP6	1.78957706772521e-21	0.179052	0.742	0.703	3.96104988170297e-17
NR6A1	1.79526213159563e-21	0.326956	0.271	0.226	3.97363320207377e-17
OPRM1	2.04168595005182e-21	-0.326324	0.251	0.297	4.5190676818447e-17
TPRG1	2.76367207011621e-21	0.395826	0.222	0.179	6.11711175999522e-17
CADM1	3.19822719994678e-21	0.364838	0.276	0.231	7.07895608436221e-17
ZFP36L1	3.2420075597093e-21	-0.131731	0.801	0.82	7.17585953266057e-17
FOXN2	3.51811016180129e-21	0.234649	0.37	0.32	7.78698503213099e-17
LINC00970	4.61489126156946e-21	0.681039	0.059	0.036	1.02146003183578e-16
WIPF1	4.91709880735333e-21	0.144302	0.769	0.728	1.08835065001959e-16
LINC01609	5.33484651845854e-21	1.25583	0.027	0.012	1.18081492839561e-16
EPHA1-AS1	5.85654546822817e-21	0.672227	0.082	0.054	1.29628777393762e-16
PILRA	5.96170184686955e-21	0.204742	0.462	0.411	1.31956308678611e-16
GALNT2	6.75522799443656e-21	0.112945	0.848	0.813	1.49520216428859e-16
LRRC3B	1.01692773503194e-20	0.879765	0.044	0.024	2.2508678487197e-16
HSPB1	1.11446344507839e-20	-0.874265	0.166	0.2	2.4667533893365e-16
LINC01358	1.17660622695113e-20	0.751812	0.061	0.038	2.60430022273363e-16
CNPY3	1.20281719549911e-20	0.261161	0.329	0.281	2.66231558051774e-16
EPB41	1.38158940139558e-20	0.161576	0.589	0.54	3.05800998104898e-16
DPP7	1.46848475852379e-20	0.344963	0.223	0.181	3.25034416451655e-16
LINC01619	1.6083488395395e-20	0.651502	0.087	0.059	3.55991932143672e-16
DUSP1	1.64476308215235e-20	-0.29708	0.172	0.213	3.64051860603601e-16
CHPT1	1.7072244773332e-20	0.257185	0.382	0.335	3.77877065812931e-16
TRERF1	1.7191828772087e-20	0.238809	0.317	0.268	3.80523938041373e-16
MICOS10	1.71966589062421e-20	-0.41554	0.306	0.347	3.80630848230763e-16
ELF2	2.18487165332965e-20	0.171826	0.671	0.628	4.83599491747985e-16
RPS6KA3	2.75446631902855e-20	0.172966	0.77	0.742	6.0967357505378e-16
MEF2C-AS2	2.83042787046171e-20	-0.423645	0.167	0.206	6.26486904847995e-16
ALCAM	3.41537542624964e-20	0.194193	0.512	0.465	7.55959196846094e-16
ZNRF2	3.582944118807e-20	-0.20835	0.585	0.615	7.93048851256741e-16
SAMD12	3.61332493878599e-20	0.211898	0.501	0.451	7.99773341950892e-16
CDKN2A	3.61912348255533e-20	0.498711	0.12	0.088	8.01056791628797e-16
SPIDR	4.68356965813244e-20	0.14472	0.869	0.848	1.03666130813103e-15
ALOX5AP	4.80342178876821e-20	0.309002	0.308	0.264	1.06318937872596e-15
ADAM9	4.87303452406387e-20	-0.287287	0.446	0.487	1.0785974615563e-15
ROR1-AS1	5.11782395308641e-20	1.1146	0.029	0.014	1.13277915377614e-15
ARRDC3-AS1	5.29363722968464e-20	0.406232	0.209	0.169	1.1716936644184e-15
PTK2B	5.89394545052831e-20	0.239365	0.464	0.416	1.30456588601994e-15
ZBTB1	6.08035630816124e-20	0.209089	0.444	0.395	1.34582606524841e-15
TNS1	7.63759247922932e-20	0.689886	0.057	0.034	1.69050471935262e-15
LINC00862	8.37253831481576e-20	0.437616	0.134	0.101	1.85317763060132e-15
ACSBG2	9.65216313880805e-20	1.48703	0.02	0.007	2.13640978914377e-15
CHSY1	1.09607324278576e-19	-0.337688	0.532	0.563	2.42604851558201e-15
SIGLEC8	1.17683410870506e-19	0.25576	0.334	0.288	2.60480461620778e-15
PMS1	1.20051660497208e-19	0.2003	0.473	0.426	2.6572234534452e-15
APOC1	1.2358783288655e-19	0.3774	0.281	0.239	2.73549309311089e-15
CASK	1.39242130978225e-19	0.212303	0.458	0.411	3.08198532707204e-15
LINC01645	1.41219693255958e-19	-1.10849	0.01	0.022	3.12575669052737e-15
NINJ1	1.47433232580981e-19	0.2898	0.292	0.247	3.26328716994744e-15
CD69	1.61024365770284e-19	-0.269338	0.059	0.085	3.56411331195946e-15
TLR5	1.67869391271783e-19	0.173279	0.45	0.397	3.71562110640964e-15
ARRB2	1.75944801899838e-19	0.184135	0.563	0.518	3.89436224525102e-15
STX3	1.76623488194343e-19	0.331098	0.21	0.17	3.90938428769358e-15
LSAMP	1.84947050574809e-19	0.115405	0.565	0.513	4.09361801742282e-15
SELPLG	2.82131164361893e-19	0.267451	0.286	0.241	6.24469119198615e-15
ATF3	2.91302068357932e-19	-1.27555	0.028	0.046	6.44767998103446e-15
CCNG2	2.97182381817636e-19	0.47824	0.174	0.138	6.57783483915155e-15
TGFB2	3.01895923936961e-19	0.731824	0.055	0.033	6.6821643804207e-15
ACOT11	3.01970214139785e-19	0.404804	0.153	0.118	6.68380871977e-15
EPB41L3	3.18475653201048e-19	-0.194739	0.748	0.764	7.049140107952e-15
TFEC	3.30155570115688e-19	0.169295	0.605	0.562	7.30766338894065e-15
BNC2	3.55096888066707e-19	0.151963	0.828	0.802	7.85971452046849e-15
HLA-B	3.77550685044293e-19	0.26559	0.411	0.368	8.35670686277038e-15
EEF2	4.18574345739464e-19	0.342158	0.215	0.175	9.2647245685973e-15
CDC42EP3	4.49815609356967e-19	0.441114	0.132	0.1	9.9562186975071e-15
VAT1	4.5570418034749e-19	0.905015	0.04	0.022	1.00865563278113e-14
CD74	5.47210747306902e-19	0.162341	0.833	0.805	1.2111962680891e-14
RHBDF2	5.52716049891732e-19	-0.111372	0.897	0.91	1.22338170483036e-14
MITF	5.82538482776485e-19	0.122423	0.505	0.454	1.28939067777747e-14
LINC01004	6.86436725674615e-19	0.232548	0.359	0.312	1.51935904860819e-14
MAP4K4	6.97972961593399e-19	-0.131883	0.91	0.913	1.54489335319083e-14
RPL13	7.08496143401255e-19	0.222033	0.548	0.508	1.56818536380434e-14
ARG2	8.19950564504456e-19	0.571581	0.09	0.063	1.81487857947416e-14
IFI16	9.62439505676447e-19	0.115008	0.786	0.747	2.13026360186425e-14
CD164	1.02561274797093e-18	0.261267	0.332	0.287	2.27009125635885e-14
CMIP	1.03190598465582e-18	-0.111379	0.943	0.946	2.2840207064372e-14
GRINA	1.06063278014404e-18	0.400649	0.164	0.129	2.34760459557081e-14
RBFOX3	1.07963639411781e-18	0.325232	0.161	0.125	2.38966719474036e-14
LINC00632	1.30179041201799e-18	0.232864	0.306	0.261	2.88138289796062e-14
ELAVL4	1.33169741259106e-18	-0.424201	0.14	0.174	2.94757905302905e-14
ANK2	1.69277103508807e-18	-0.174072	0.567	0.602	3.74677940906394e-14
TTC7A	2.35773486427512e-18	-0.221556	0.671	0.682	5.21861034858655e-14
TMED8	2.36442725624135e-18	0.256354	0.294	0.25	5.2334232889646e-14
RPL18	2.69513225677879e-18	0.272246	0.368	0.325	5.96540573715416e-14
RAB11A	2.72357168841381e-18	-0.251808	0.39	0.43	6.02835357513512e-14
CUX2	2.92934686891686e-18	0.418259	0.11	0.08	6.48381635966057e-14
C1QC	2.95079054187391e-18	0.17048	0.538	0.491	6.53127978538372e-14
HDAC9	2.98814191593535e-18	0.127072	0.918	0.905	6.61395331673129e-14
STX11	3.20004516271211e-18	-0.526021	0.067	0.093	7.08297996314698e-14
LINC02642	3.58433594718539e-18	-0.540724	0.124	0.156	7.93356918550014e-14
SRSF6	4.22949377572535e-18	0.295696	0.227	0.187	9.36156152319048e-14
ARHGEF3	4.30116495145727e-18	0.407771	0.156	0.122	9.52019850355553e-14
COLEC12	6.61638044421698e-18	0.892831	0.044	0.026	1.46446964752299e-13
EPS15	7.06962008973308e-18	0.129696	0.803	0.773	1.56478971066152e-13
PDPN	7.07475223464742e-18	-0.384576	0.134	0.168	1.56592565961686e-13
DBI	7.9708452013169e-18	0.493801	0.109	0.08	1.76426687685948e-13
IQCH-AS1	8.50870938105747e-18	0.343102	0.204	0.167	1.88331773440326e-13
LIPA	8.63604917987953e-18	-0.280884	0.321	0.362	1.91150312547453e-13
DUSP10	1.1076138484232e-17	0.323937	0.2	0.162	2.4515924920999e-13
NSFL1C	1.23863932940404e-17	0.311352	0.231	0.192	2.7416042917029e-13
SMARCC2	1.25885526755534e-17	0.355008	0.165	0.13	2.78635024920699e-13
YPEL3	1.2798947945519e-17	0.304664	0.212	0.174	2.83291913826118e-13
PABPC4	1.40172180299339e-17	0.255253	0.3	0.257	3.10257103874558e-13
IFITM10	1.4347573323039e-17	0.426704	0.107	0.079	3.17569187932146e-13
WNT5A	1.49931065855624e-17	0.239295	0.34	0.296	3.31857421164838e-13
PTH2R	1.55774524976644e-17	-0.572967	0.082	0.109	3.44791333583304e-13
CYTH4	1.71564848042144e-17	-0.238454	0.371	0.412	3.79741634656481e-13
GPC5-AS1	1.74730364001514e-17	1.31344	0.019	0.007	3.86748187680951e-13
IL27RA	1.76987867955922e-17	0.780375	0.047	0.028	3.91744946933638e-13
ARHGAP20	1.92985261775291e-17	-0.296516	0.224	0.264	4.27153578413429e-13
RGS2	1.96148428607249e-17	-0.607924	0.057	0.081	4.34154931879286e-13
ZNF263	2.03031000477409e-17	0.349662	0.18	0.145	4.49388816456697e-13
MFGE8	2.07610953484344e-17	0.927024	0.037	0.021	4.59526084442246e-13
CYTL1	2.31201989528715e-17	0.345004	0.18	0.145	5.11742483622858e-13
STOM	2.66758995133308e-17	0.211005	0.335	0.29	5.90444359828064e-13
PLXND1	2.82720010567231e-17	0.244792	0.353	0.311	6.2577247138951e-13
ATP2B4	3.24933883348538e-17	0.226033	0.329	0.285	7.19208657403655e-13
CR1L	3.68471706600385e-17	1.01241	0.028	0.013	8.15575275389292e-13
IQSEC2	3.69743781808912e-17	0.293537	0.24	0.201	8.18390886655845e-13
NXN	3.98513890945275e-17	-0.286259	0.255	0.295	8.82070646218272e-13
TAPT1-AS1	4.13383358220634e-17	0.214002	0.409	0.364	9.14982725085552e-13
COL4A4	4.22829842591691e-17	0.93645	0.032	0.017	9.35891573592449e-13
H2BC8	4.27882519355002e-17	-0.453303	0.064	0.089	9.47075168340361e-13
PLEKHG1	4.92641199749168e-17	0.555648	0.093	0.067	1.09041203152481e-12
RPS4Y1	5.16956568622025e-17	-0.493321	0.05	0.072	1.14423166898799e-12
CFAP161	5.42768783154898e-17	0.508337	0.092	0.066	1.20136442463505e-12
CDK6	6.50954403838005e-17	0.155964	0.651	0.609	1.44082247745504e-12
RUNX2	6.67463492896587e-17	0.150802	0.793	0.767	1.47736369517731e-12
SLC8A1-AS1	6.74104074851199e-17	-0.354993	0.259	0.295	1.49206195927564e-12
BICRAL	6.8214787625153e-17	0.169985	0.541	0.499	1.50986610929514e-12
VEGFA	7.1574784032623e-17	-0.581708	0.074	0.099	1.58423626977808e-12
CD81	7.41548049005526e-17	0.231594	0.465	0.425	1.64134245166883e-12
DOCK4-AS1	8.2027721997389e-17	-0.560474	0.079	0.106	1.81560159869021e-12
AOAH	8.40909651980649e-17	0.112535	0.907	0.888	1.86126942369397e-12
FHAD1	8.8983930542791e-17	-0.593637	0.062	0.086	1.96957031863414e-12
CAB39	9.29457926581948e-17	0.134369	0.809	0.777	2.05726217469648e-12
ARHGAP12	1.12416201332884e-16	-0.122509	0.811	0.828	2.48822020030205e-12
LYVE1	1.16252094932162e-16	-0.369694	0.177	0.213	2.57312386922847e-12
GAA	1.18411626604587e-16	0.228323	0.309	0.267	2.62092294326592e-12
RCSD1	1.40879439726722e-16	0.133456	0.765	0.728	3.11822551891126e-12
RENO1	1.60358352717582e-16	1.1249	0.025	0.012	3.54937177905096e-12
RASGRP2	1.71952340187339e-16	0.476257	0.094	0.068	3.80599309770657e-12
EAF2	1.74974945504277e-16	0.208956	0.308	0.265	3.87289544379167e-12
ZNF800	1.79501825274638e-16	0.216189	0.383	0.341	3.97309340062884e-12
INPP4A	1.90059065995241e-16	-0.165247	0.598	0.625	4.20676736673866e-12
APOBR	1.961145225487e-16	0.580444	0.067	0.045	4.34079884209293e-12
TMSB4X	2.00449268262802e-16	-0.105848	0.669	0.709	4.43674410372887e-12
DGKH	2.04710405566515e-16	0.389755	0.148	0.116	4.53106011680923e-12
BAZ2B	2.27271452269759e-16	0.106054	0.889	0.875	5.03042632453885e-12
INSR	2.28477012967117e-16	0.178568	0.359	0.314	5.05711020501416e-12
CEBPA	2.30288371898144e-16	0.344483	0.184	0.149	5.09720282359353e-12
SASH1	2.4474401512345e-16	0.40719	0.091	0.065	5.41716403074245e-12
CCNY	2.59118333962192e-16	-0.126704	0.854	0.865	5.73532520391916e-12
LINC02698	2.87547496656231e-16	1.08268	0.029	0.015	6.36457629098902e-12
SLC1A5	3.03391198407135e-16	0.25496	0.208	0.171	6.71526078554352e-12
PLS1	3.55752239572199e-16	0.508722	0.106	0.079	7.87422007069105e-12
SAMD1	3.59589702040891e-16	0.497917	0.082	0.058	7.95915846497307e-12
CYP2S1	3.86047566437238e-16	0.741675	0.047	0.029	8.54477683552182e-12
CDK2AP1	3.9000124759624e-16	0.414042	0.132	0.102	8.63228761429518e-12
ATP1B3	4.33315746265597e-16	0.284388	0.356	0.314	9.59101072784272e-12
EIF4EBP2	4.49892290868499e-16	0.310737	0.185	0.15	9.95791596608336e-12
CNTN5	4.73198356917646e-16	0.206136	0.365	0.323	1.04737724320152e-11
SH3BP5-AS1	4.92524907256644e-16	0.710772	0.046	0.028	1.09015462972186e-11
AXL	5.30991235677708e-16	0.177832	0.499	0.457	1.17529600104904e-11
FCHSD2	6.15039373173756e-16	-0.105074	0.969	0.97	1.36132814858279e-11
CNTRL	6.2040125930954e-16	0.160403	0.558	0.519	1.37319614735574e-11
ABRAXAS1	6.48110979721628e-16	0.467271	0.106	0.079	1.43452884251585e-11
CTSH	6.77049864857824e-16	0.238969	0.324	0.284	1.49858217087631e-11
JUN	7.11490716243291e-16	0.377463	0.134	0.104	1.5748135513329e-11
ERC2	7.17741050257535e-16	-0.278121	0.478	0.507	1.58864804064003e-11
GLIPR1	8.09521292472e-16	0.278647	0.242	0.205	1.79179442875753e-11
ATP6AP1	8.35380912511284e-16	0.336332	0.169	0.136	1.84903211175248e-11
GPX3	8.36198403055654e-16	1.1905	0.022	0.01	1.85084154532338e-11
NPIPB4	9.71924636007801e-16	0.311774	0.186	0.152	2.15125798933967e-11
SIPA1	9.7638920061166e-16	0.271217	0.23	0.193	2.16113985663385e-11
SLC1A2	9.98845508760447e-16	0.187643	0.142	0.111	2.21084464909037e-11
WNK1	1.06906763336942e-15	0.123124	0.77	0.736	2.36627429969988e-11
CHD5	1.12662271679104e-15	0.407012	0.124	0.096	2.49366672134529e-11
NLGN4Y	1.1314902990117e-15	-0.406511	0.138	0.169	2.5044406278325e-11
FARP1	1.13640402326455e-15	0.202305	0.415	0.373	2.51531666509375e-11
PER3	1.13897513277058e-15	-0.372589	0.159	0.191	2.5210075588744e-11
RUBCNL	1.25482741944715e-15	-0.194544	0.543	0.573	2.77743501020432e-11
LINC01480	1.32593281225593e-15	0.355707	0.151	0.12	2.93481968664728e-11
TSHZ3	1.34260103790403e-15	0.424919	0.114	0.086	2.97171313729679e-11
DNAAF9	1.35032188257542e-15	0.123107	0.762	0.723	2.98880245489243e-11
RNF141	1.47001982869298e-15	0.3504	0.144	0.114	3.25374188882904e-11
DSC2	1.53989066863538e-15	0.298001	0.185	0.151	3.40839400595756e-11
SERTAD2	1.5692144614069e-15	0.2478	0.339	0.298	3.47329928887803e-11
CD44	1.79454798812133e-15	0.677862	0.052	0.034	3.97205251690776e-11
IQCJ-SCHIP1	1.79651871447921e-15	0.198732	0.497	0.454	3.97641452262828e-11
ZBTB38	1.84824995382313e-15	0.212605	0.35	0.309	4.0909164477921e-11
PDE10A	1.92267389824054e-15	-0.469217	0.093	0.12	4.25564640636562e-11
PIK3CG	2.06853487604305e-15	0.241068	0.287	0.248	4.5784950946337e-11
SORT1	2.08046308653796e-15	0.120002	0.69	0.648	4.60489699574313e-11
FCHO2	2.17194254611698e-15	0.222522	0.461	0.421	4.80737763157532e-11
SH3PXD2A	2.26746888162267e-15	0.309425	0.237	0.201	5.01881562258362e-11
CXCL16	2.38453070300154e-15	0.302858	0.253	0.216	5.2779202580236e-11
ANP32A	2.51020966710231e-15	0.158732	0.558	0.516	5.55609807716426e-11
COL15A1	2.71486722085233e-15	-0.799923	0.023	0.038	6.00908710663456e-11
ENTPD1	2.74708591810088e-15	-0.130046	0.787	0.802	6.0803999711245e-11
CLTA	2.80675299566112e-15	0.235412	0.29	0.251	6.21246708059631e-11
SRGN	2.94172305597113e-15	-0.203605	0.506	0.536	6.5112098120865e-11
NHSL1-AS1	3.09781983878763e-15	0.379133	0.143	0.113	6.85671443117253e-11
SRSF11	3.28722274153067e-15	0.153394	0.559	0.515	7.27593881610398e-11
CREBRF	3.30978497233797e-15	0.198133	0.434	0.394	7.32587805777287e-11
DDX3Y	3.92387741442235e-15	-0.440191	0.058	0.081	8.68511026908243e-11
PCM1	3.92626244371286e-15	0.1109	0.79	0.756	8.69038929291404e-11
GCLC	4.62997040040984e-15	0.370553	0.188	0.156	1.02479764842671e-10
LINC01001	4.85525735236355e-15	-0.356128	0.125	0.156	1.07466266237215e-10
TNFAIP8	4.89009576145045e-15	0.225176	0.323	0.282	1.08237379583944e-10
SLC6A12	5.04201744593088e-15	1.51736	0.016	0.006	1.11600014148234e-10
RUFY3	5.36827170986632e-15	0.136828	0.575	0.532	1.18821326026181e-10
SAP25	5.52750402299164e-15	0.332128	0.159	0.128	1.22345774044897e-10
DOCK5	5.76525631176757e-15	0.122673	0.645	0.606	1.27608183204663e-10
RRAGC-DT	5.82556941079937e-15	0.281456	0.246	0.209	1.28943153338633e-10
LINC02513	6.2315992896305e-15	-0.992923	0.015	0.027	1.37930218676682e-10
DENND2D	6.32304265471089e-15	0.434983	0.088	0.064	1.39954226119371e-10
ITGAX	6.42753992296534e-15	-0.227363	0.475	0.504	1.42267168654915e-10
YAF2	7.05556806554613e-15	0.174971	0.441	0.397	1.56167943562798e-10
CECR2	7.06231269149661e-15	-0.425156	0.086	0.111	1.56317229113586e-10
LINC00623	7.08879660330437e-15	0.283845	0.206	0.172	1.56903424017539e-10
SLC48A1	7.44554606273626e-15	0.529576	0.071	0.049	1.64799716552604e-10
EML4	7.66251767492196e-15	-0.104425	0.685	0.718	1.69602166216723e-10
DNAJA4	8.01366011790639e-15	-0.528851	0.082	0.107	1.7737435304974e-10
MAN1A1	8.05425062262975e-15	0.165734	0.59	0.552	1.78272783281287e-10
PKD1	8.30213074522816e-15	0.300373	0.223	0.188	1.8375936191488e-10
SNX9	8.6251098022148e-15	-0.187528	0.497	0.534	1.90908180362222e-10
PRPF4B	8.83742326906342e-15	0.164657	0.494	0.455	1.9560752663745e-10
MOB3B	9.71247667263832e-15	0.305772	0.249	0.213	2.14975958672177e-10
MYO1D	9.86592469522382e-15	0.327025	0.205	0.171	2.18372377204084e-10
SSTR2	1.06716665523277e-14	0.751837	0.038	0.022	2.3620666746922e-10
ACTN1	1.09237878237121e-14	0.397632	0.132	0.103	2.41787119690043e-10
PPM1L	1.11585943433904e-14	0.221565	0.366	0.326	2.46984327196602e-10
SPN	1.12548966043369e-14	0.342125	0.145	0.116	2.49115881440394e-10
CMTM3	1.14854427596681e-14	0.376387	0.148	0.119	2.54218790042494e-10
C1QB	1.15347496213444e-14	0.134522	0.665	0.621	2.55310148118838e-10
H1-10	1.19402516880561e-14	0.426992	0.106	0.08	2.64285530863434e-10
PIK3CA	1.2026749986563e-14	0.187392	0.431	0.39	2.66200084202585e-10
ATP2C1	1.24217289725718e-14	-0.18046	0.767	0.774	2.74942549078904e-10
SNHG12	1.2442945179076e-14	0.313162	0.131	0.103	2.75412148593669e-10
CLN8	1.38592077854073e-14	0.212029	0.331	0.292	3.06759705122206e-10
TENT2	1.39639578447689e-14	-0.1228	0.77	0.788	3.09078242936115e-10
RAPGEF1	1.4591027069943e-14	-0.161036	0.882	0.895	3.22957793166119e-10
ENOSF1	1.51418565595566e-14	-0.324291	0.131	0.161	3.35149853089225e-10
EXOSC6	1.54759832044419e-14	0.336094	0.126	0.098	3.42545412247118e-10
TP53I11	1.5790911655256e-14	0.344389	0.138	0.109	3.49516038577436e-10
SAMSN1	1.60054016065716e-14	-0.175424	0.65	0.677	3.54263559159855e-10
FLII	1.70118974827329e-14	0.344983	0.13	0.101	3.7654133888281e-10
ROCK1	1.74839832408408e-14	0.103613	0.807	0.774	3.8699048505277e-10
DRAM2	1.75536548027677e-14	0.162648	0.404	0.36	3.88532595404459e-10
TSPO	1.86434968582166e-14	0.334827	0.176	0.144	4.12655159459767e-10
SLC2A9	1.96199481211483e-14	0.188643	0.428	0.386	4.34267931713497e-10
BSG	1.99039083039802e-14	0.339404	0.149	0.119	4.40553106400298e-10
METTL17	2.0114066334045e-14	0.37261	0.126	0.099	4.45204744237752e-10
MTAP	2.04141814950488e-14	0.158026	0.489	0.446	4.51847493211411e-10
SYCP2	2.06955042990774e-14	0.473226	0.082	0.06	4.5807429215578e-10
LINC01098	2.08563967874274e-14	1.0266	0.019	0.008	4.61635486492917e-10
ADAMTS10	2.09273074428357e-14	0.259702	0.233	0.197	4.63205022939725e-10
TMBIM6	2.17073138995991e-14	0.190587	0.391	0.351	4.80469685853727e-10
GIMAP5	2.20250549873634e-14	0.318748	0.148	0.119	4.87502567090302e-10
LIMCH1	2.30519630479504e-14	0.228105	0.264	0.226	5.10232150103335e-10
P4HA1	2.42670038367972e-14	-0.345842	0.591	0.612	5.37125862923669e-10
ATP6V0A1	2.4898183332869e-14	-0.195018	0.462	0.495	5.51096389889721e-10
HLA-DQB1	2.88111657938551e-14	0.344023	0.203	0.171	6.3770634368119e-10
TMEM119	3.10712952456219e-14	0.288408	0.205	0.171	6.87732048966595e-10
LYL1	3.2499497705608e-14	0.304546	0.198	0.165	7.19343882215927e-10
DENND1B	3.29644483961717e-14	0.245293	0.261	0.225	7.29635100800864e-10
TM6SF1	3.43316518363525e-14	0.165877	0.44	0.398	7.59896781745826e-10
DACT1	3.65182741765357e-14	0.656101	0.046	0.029	8.08295480623442e-10
PPP6R2	3.72465447968324e-14	-0.160907	0.646	0.67	8.24415022533089e-10
LIPG	4.04570297961108e-14	-0.536507	0.056	0.077	8.95475897507118e-10
CLEC1A	4.08085199528455e-14	0.377018	0.112	0.086	9.03255780636281e-10
GRID2	4.14078745860945e-14	0.357183	0.483	0.451	9.16521896088615e-10
CORO1A	4.26153382551699e-14	0.237561	0.293	0.256	9.43247896939931e-10
MAT2A	4.31608605751794e-14	0.219449	0.344	0.305	9.5532248797102e-10
CX3CR1	4.39846539403172e-14	-0.208434	0.454	0.487	9.73556330314981e-10
LINC01242	4.59649486298205e-14	-1.61453	0.005	0.013	1.01738817297245e-09
PTCHD4	4.83743796869928e-14	0.395805	0.234	0.201	1.0707185199919e-09
SH3BGRL3	5.12080336633068e-14	0.45245	0.094	0.071	1.13343861710363e-09
LINC01446	5.2880925347718e-14	-1.87527	0.003	0.01	1.17046640164639e-09
MAFB	5.30119361415958e-14	0.295596	0.257	0.221	1.17336619455808e-09
CFAP74	5.52438572521492e-14	-0.360251	0.128	0.156	1.22276753641907e-09
C12orf75	6.38117999824833e-14	-0.263043	0.27	0.304	1.41241038081229e-09
TTC7B	6.56963392042174e-14	-0.189324	0.4	0.437	1.45412277194615e-09
NDRG2	6.72991847618243e-14	0.300403	0.166	0.136	1.48960015551822e-09
SERINC5	7.89058627698397e-14	0.266602	0.268	0.233	1.74650236654763e-09
LINC01440	8.32311944992983e-14	1.11581	0.021	0.01	1.84223925904747e-09
TSHZ2	9.94009268256449e-14	0.314719	0.145	0.117	2.20014011435882e-09
CAMK2N1	1.0475605243143e-13	0.300615	0.183	0.152	2.31867046451726e-09
ARHGEF7	1.12677909345346e-13	-0.218985	0.529	0.556	2.49401284544989e-09
LPCAT1	1.12849235055419e-13	-0.336786	0.181	0.212	2.49780496871665e-09
AUH	1.20964514506693e-13	0.160675	0.455	0.413	2.67742856409114e-09
OPCML	1.21745007826217e-13	0.134952	0.544	0.504	2.69470400322548e-09
SYCP2L	1.25052007682929e-13	0.525932	0.073	0.052	2.76790113805394e-09
AMN1	1.25749390427646e-13	0.271038	0.223	0.19	2.78333700772552e-09
RPS10	1.26151031761322e-13	0.344791	0.149	0.121	2.7922269370051e-09
NCOA3	1.30505582518129e-13	0.10788	0.789	0.757	2.88861056345626e-09
NUDT16	1.41288256953833e-13	0.336942	0.129	0.102	3.12727427941614e-09
C11orf80	1.45471160693751e-13	0.280162	0.192	0.16	3.21985867079549e-09
CYP4V2	1.63747785605061e-13	0.309424	0.155	0.125	3.62439348658241e-09
SF3B1	1.65141512332683e-13	0.127982	0.479	0.436	3.65524223397159e-09
SMAD2	1.89846021989062e-13	0.143418	0.588	0.553	4.2020518507059e-09
WARS2-AS1	2.09578093655483e-13	0.291573	0.211	0.179	4.63880152497045e-09
ZBTB44	2.12563009141331e-13	0.200655	0.308	0.27	4.70486964433421e-09
NAV2	2.23897816017058e-13	-0.320937	0.371	0.402	4.95575425972156e-09
STK32B	2.25645380314321e-13	0.153861	0.435	0.394	4.99443484787719e-09
LINC02506	2.43459197620731e-13	-1.21559	0.01	0.019	5.38872588013727e-09
TANK	2.45865099044706e-13	0.164341	0.571	0.537	5.44197810225553e-09
BTBD11	2.51487447988715e-13	0.52174	0.081	0.059	5.56642317378221e-09
GATM	2.67333045025611e-13	-0.323081	0.174	0.206	5.91714961859688e-09
PXDNL	2.73028114546883e-13	0.414943	0.083	0.061	6.0432042873807e-09
TREM1	2.86683761539544e-13	-0.640089	0.018	0.03	6.34545837791627e-09
ARHGEF40	2.88999974500006e-13	0.235353	0.255	0.22	6.39672543558313e-09
PTEN	2.99416611581731e-13	0.109407	0.766	0.731	6.62728728075002e-09
APCDD1	3.02084805871438e-13	0.552159	0.074	0.053	6.68634509315841e-09
RAPGEF2	3.11328301994146e-13	-0.138655	0.715	0.732	6.89094063633843e-09
LY86	3.15454561807227e-13	-0.129888	0.791	0.797	6.98227127104116e-09
TRHDE	3.23912653027026e-13	0.438824	0.126	0.1	7.16948266210019e-09
GYPC	3.25784508110064e-13	0.196118	0.285	0.248	7.21091430250815e-09
LHFPL3	3.29734367274794e-13	0.486116	0.086	0.064	7.29834048526028e-09
UBC	3.34616658776579e-13	-0.29775	0.297	0.329	7.40640512536081e-09
RASAL3	3.36742053493826e-13	0.229181	0.227	0.192	7.45344861203235e-09
SPACA6	3.39095365432815e-13	0.401295	0.104	0.08	7.50553681848993e-09
USP3	3.40967847927792e-13	0.126382	0.579	0.541	7.54698234603374e-09
OGA	3.52534145903244e-13	-0.165903	0.479	0.514	7.80299078542241e-09
TBL1X	3.56796933559413e-13	0.262422	0.233	0.199	7.89734332740404e-09
LINC01138	3.62695036634995e-13	0.319982	0.176	0.146	8.02789194087898e-09
LINC02018	3.72056377878966e-13	0.496675	0.071	0.051	8.23509586797304e-09
HMGB2	3.9340224705008e-13	0.582998	0.056	0.038	8.70756533620647e-09
GPR135	3.93930464062246e-13	0.327251	0.128	0.101	8.71925689155374e-09
DPYSL2	4.02993855525761e-13	-0.135099	0.617	0.646	8.91986599820719e-09
KAZN	4.29090619254082e-13	0.165393	0.422	0.382	9.49749176656984e-09
ADGRV1	4.53582409166403e-13	0.171873	0.114	0.088	1.00395930444892e-08
AGPAT5	4.62264806309083e-13	0.188537	0.297	0.26	1.02317692228452e-08
TTLL4	4.67312521569537e-13	0.243673	0.239	0.205	1.03434953524201e-08
LINC01036	4.69225928093606e-13	0.616739	0.055	0.037	1.03858466924239e-08
ADGRG1	4.96069047258275e-13	0.118096	0.616	0.578	1.09799922920147e-08
DSE	5.04404677660508e-13	0.123723	0.494	0.453	1.11644931353377e-08
C12orf42	5.32517681711701e-13	0.42981	0.11	0.086	1.17867463670068e-08
UPK3BL1	5.35074626576153e-13	0.475669	0.08	0.059	1.18433417846366e-08
ABCA13	5.36845329472123e-13	1.39053	0.014	0.006	1.1882534522536e-08
GPR34	5.48798525275424e-13	0.184544	0.458	0.42	1.21471065584462e-08
TDRD15	5.73656695749502e-13	1.33695	0.015	0.006	1.26973173037195e-08
CDH4	5.85863954372926e-13	0.376931	0.071	0.051	1.29675127660904e-08
CD163L1	5.92890710215076e-13	-0.393829	0.264	0.292	1.31230429799005e-08
SLC40A1	5.93050383728924e-13	0.326661	0.141	0.114	1.3126577193456e-08
PTOV1	6.09709735995404e-13	0.319857	0.159	0.131	1.34953152965223e-08
NLRP4	6.2062581822058e-13	-0.772007	0.022	0.035	1.37369318604943e-08
GIMAP1	6.37005334948287e-13	0.34622	0.131	0.104	1.40994760837454e-08
HACD2	6.44122632442042e-13	0.263961	0.241	0.208	1.42570103464722e-08
PFN1	6.83736474602186e-13	0.29422	0.216	0.184	1.51338231288448e-08
MMRN1	7.06137035216315e-13	0.404757	0.105	0.081	1.56296371374779e-08
F11R	7.06798689628952e-13	0.379326	0.099	0.076	1.56442821962472e-08
LINC02435	7.24220894570858e-13	-1.00232	0.007	0.016	1.60299052804314e-08
ULK2	7.24690009366773e-13	-0.197983	0.375	0.41	1.60402886673241e-08
CALCOCO2	7.46641584814155e-13	0.185778	0.284	0.247	1.65261648382765e-08
SHISA9	7.47106701130862e-13	0.252701	0.177	0.146	1.65364597228305e-08
EVA1C	7.4804008639486e-13	0.341817	0.15	0.122	1.65571192722638e-08
SHMT1	7.48701364948509e-13	0.195582	0.285	0.248	1.65717560117703e-08
H3-7	7.69952224649046e-13	0.463357	0.076	0.056	1.7042122540382e-08
FNDC3A	7.78616999480997e-13	0.102318	0.716	0.684	1.72339086665124e-08
SNX27	7.86033683369952e-13	0.18744	0.479	0.446	1.73980695477105e-08
SGCZ	8.19591751779887e-13	0.229415	0.227	0.194	1.8140843833896e-08
ZNF703	8.48654160359286e-13	0.504541	0.067	0.048	1.87841111853924e-08
KCTD16	8.52318753731927e-13	0.205814	0.254	0.218	1.88652232951025e-08
NCEH1	8.62237212865146e-13	0.226393	0.253	0.218	1.90847584695571e-08
PRRG4	8.85367319306263e-13	0.335816	0.112	0.087	1.95967202455248e-08
SIL1	8.93913809580456e-13	-0.199619	0.401	0.435	1.97858882612538e-08
MCF2L	9.20740238650964e-13	-0.134556	0.681	0.699	2.03796644423004e-08
FRRS1	1.00964169830762e-12	0.404515	0.131	0.105	2.23474093503409e-08
GIT2	1.02120920118925e-12	0.127408	0.563	0.521	2.26034444591228e-08
EMID1	1.05121995939453e-12	-0.281578	0.185	0.216	2.32677025812385e-08
NPTX2	1.06318122763755e-12	-0.987042	0.008	0.017	2.35324532925295e-08
SH3PXD2B	1.23164677162808e-12	0.233171	0.262	0.227	2.7261269643216e-08
TESK1	1.30748114852146e-12	0.649248	0.047	0.031	2.8939787741374e-08
CDH23	1.33091761561021e-12	-0.270572	0.245	0.278	2.94585305039164e-08
ITGAV	1.48073268470679e-12	0.171863	0.493	0.458	3.27745372433001e-08
SGK1	1.53196958984747e-12	-0.256363	0.419	0.448	3.3908614901684e-08
OCLN	1.55664018246817e-12	0.661711	0.036	0.022	3.44546737987504e-08
PNPLA6	1.56401179198615e-12	0.237664	0.233	0.2	3.46178370038214e-08
CXCR4	1.61555927063692e-12	0.35544	0.112	0.087	3.57587888962776e-08
ARRDC3	1.64449458732416e-12	-0.312942	0.111	0.137	3.63992431958329e-08
HIF3A	1.66046443890439e-12	0.535439	0.042	0.027	3.67527198907099e-08
GNB4	1.71228660231052e-12	-0.166005	0.644	0.662	3.7899751655541e-08
RORA	1.75682560086591e-12	0.105905	0.373	0.331	3.88855778495662e-08
KIAA1217	1.7918238710839e-12	0.207117	0.2	0.168	3.9660229562571e-08
SNX7	1.8082321986879e-12	0.307526	0.155	0.127	4.00234114857581e-08
PIP4P2	1.85525088178918e-12	0.237517	0.211	0.179	4.10641230175217e-08
KCNMB2-AS1	1.95551813647593e-12	-0.223838	0.267	0.301	4.32834384327583e-08
ATP5MC2	2.04481855215141e-12	0.250245	0.237	0.204	4.52600138333193e-08
NUPR1	2.0615803525458e-12	0.39527	0.074	0.054	4.56310195232487e-08
UNC119	2.06795912214882e-12	0.498224	0.067	0.048	4.57722072096419e-08
MLF2	2.09728429709972e-12	0.384948	0.103	0.08	4.64212906320051e-08
TPK1	2.10460446641823e-12	0.143972	0.639	0.608	4.65833152597012e-08
PCGF3-AS1	2.13826973905471e-12	-0.211336	0.339	0.372	4.7328462404237e-08
SLC47A1	2.14854620440382e-12	0.46976	0.07	0.05	4.75559216882742e-08
FGF14	2.25960104848788e-12	0.126633	0.48	0.436	5.00140096072307e-08
BRI3	2.29742397623758e-12	0.226722	0.322	0.289	5.08511822900427e-08
RAP2B	2.2983871675231e-12	0.371892	0.121	0.096	5.08725015659562e-08
SEPTIN1	2.38076843457483e-12	0.69917	0.037	0.023	5.26959285308792e-08
DGAT1	2.41631334754583e-12	0.469104	0.074	0.054	5.34826796345795e-08
HSPH1	2.50457120437661e-12	-0.67028	0.357	0.376	5.54361790376719e-08
TEX11	2.56210639605642e-12	0.892506	0.024	0.013	5.67096629703127e-08
IL15	2.68800614955984e-12	0.206318	0.245	0.211	5.94963281143575e-08
HELLS	2.82850511910155e-12	0.585712	0.083	0.063	6.26061323061937e-08
ZNF33B	3.05559498162012e-12	0.211573	0.24	0.207	6.76325393231798e-08
SLC22A16	3.10124324527747e-12	1.55128	0.011	0.004	6.86429179909714e-08
IL6R	3.17161992247931e-12	-0.198299	0.432	0.461	7.02006353641571e-08
ZNF608	3.30702281113563e-12	-0.316663	0.125	0.152	7.3197642901676e-08
ZNF706	3.3412709650472e-12	0.199535	0.346	0.312	7.39556915403547e-08
POLR2H	3.37541921043576e-12	0.399715	0.105	0.082	7.47115288037851e-08
IRF2BPL	3.65808606221951e-12	0.350378	0.104	0.081	8.09680769011666e-08
AIDA	3.71237245898787e-12	0.162115	0.438	0.4	8.21696520072375e-08
ZBTB7A	3.72699892326756e-12	0.189855	0.281	0.246	8.24933941676041e-08
ARHGDIB	4.01926469330739e-12	0.161728	0.35	0.312	8.89624047216659e-08
SPRED1	4.12728444331284e-12	-0.108796	0.834	0.849	9.13533138682863e-08
XKR6	4.25583984939911e-12	-0.16535	0.504	0.534	9.41987592265999e-08
NCL	4.28186592606801e-12	0.275213	0.173	0.144	9.47748204075893e-08
SYNE2	4.4016981847201e-12	0.790565	0.036	0.022	9.74271876205948e-08
GPR183	4.69316431211307e-12	-0.123507	0.17	0.2	1.03878498884311e-07
LINC01830	4.76835361723987e-12	1.30662	0.013	0.005	1.05542738963987e-07
THEMIS2	4.88403890148936e-12	-0.251961	0.247	0.278	1.08103317045566e-07
CEBPD	5.10079001337072e-12	0.109526	0.424	0.382	1.12900886155948e-07
ELOVL1	5.19604844455228e-12	0.471124	0.073	0.054	1.1500933627172e-07
NBPF14	5.3572894334571e-12	0.358954	0.107	0.084	1.18578244320139e-07
ZFPM2	5.4211713585179e-12	0.257107	0.21	0.179	1.19992206849435e-07
SEMA4D	5.75260010087139e-12	0.158981	0.481	0.446	1.27328050632687e-07
ZNF532	5.77738997396775e-12	-0.237649	0.288	0.321	1.27876749683802e-07
UBTF	5.90926277701404e-12	0.298108	0.128	0.103	1.30795622306429e-07
SELENOP	5.95477204777113e-12	0.491673	0.094	0.072	1.31802924505366e-07
ADSS2	6.11610507127766e-12	0.246284	0.216	0.185	1.3537386964766e-07
EMILIN2	6.5055577222036e-12	0.671543	0.051	0.035	1.43994014623255e-07
DANT2	6.94550932094099e-12	0.315884	0.222	0.192	1.53731903309708e-07
TTL	7.04487491657594e-12	0.212352	0.237	0.204	1.55931261403492e-07
HMG20B	7.06364507643795e-12	0.488568	0.064	0.046	1.56346720121878e-07
ANXA5	7.09512403665797e-12	0.210968	0.258	0.225	1.57043475427388e-07
USP2-AS1	7.45874054162597e-12	0.80158	0.029	0.017	1.65091763148349e-07
SLC31A2	7.59900559012057e-12	0.399323	0.094	0.073	1.68196389731729e-07
SETBP1	7.96218261373681e-12	-0.13504	0.465	0.502	1.7623494997245e-07
MPHOSPH8	8.02831006349788e-12	0.166365	0.39	0.351	1.77698614945462e-07
CALHM2	8.11199357306349e-12	0.609538	0.045	0.03	1.79550865746187e-07
CTNND1	8.20856340460733e-12	-0.108576	0.802	0.814	1.81688342397579e-07
GPBP1	8.2118674530918e-12	-0.157155	0.567	0.591	1.81761474206734e-07
STAMBPL1	8.27811437772056e-12	0.193633	0.445	0.412	1.83227783636467e-07
ZNF804A	8.57171422573143e-12	0.215235	0.299	0.265	1.89726322672339e-07
KBTBD12	9.07405228579504e-12	0.173005	0.35	0.313	2.00845073293787e-07
SND1	9.34744601174715e-12	-0.133904	0.749	0.759	2.06896370024011e-07
SYN3	9.39335797744615e-12	0.139301	0.256	0.222	2.07912585472793e-07
CREM	9.43254021107055e-12	-0.208733	0.26	0.293	2.08779845031836e-07
PFKP	9.89589098173393e-12	0.242467	0.19	0.16	2.19035650989699e-07
LINC01435	1.0019520494359e-11	0.769621	0.028	0.016	2.21772066622143e-07
LINC01762	1.07184423391589e-11	0.568936	0.058	0.041	2.37242002734944e-07
CPSF1	1.07592450639007e-11	0.387353	0.087	0.066	2.38145130244379e-07
DNAJB14	1.09084063689833e-11	0.163221	0.42	0.384	2.41446666571076e-07
AUP1	1.14038044809628e-11	0.327643	0.169	0.142	2.5241180838163e-07
ITSN1	1.15316246445099e-11	0.202727	0.343	0.308	2.55240979881581e-07
MT-ND6	1.19567590246553e-11	0.618806	0.046	0.031	2.64650904251721e-07
TES	1.21018090167257e-11	0.644862	0.046	0.031	2.67861440776207e-07
PARD3B	1.28396700991844e-11	-0.249183	0.248	0.28	2.84193257975348e-07
RTTN	1.34445202001093e-11	-0.307445	0.472	0.5	2.9758101010922e-07
LINC02649	1.36418996938804e-11	-0.177668	0.303	0.338	3.01949807824348e-07
FCGBP	1.39112526562855e-11	0.124239	0.366	0.327	3.07911666294223e-07
QARS1	1.4265279669396e-11	0.412481	0.08	0.06	3.1574770020241e-07
TAFA2	1.43250272354438e-11	0.178956	0.364	0.328	3.17070152829314e-07
FUCA1	1.46281315359473e-11	0.369611	0.097	0.075	3.23779063416658e-07
ADCY7	1.47308945676898e-11	-0.136284	0.534	0.562	3.26053620361247e-07
WIPF3	1.51070459985862e-11	0.173431	0.175	0.145	3.34379356132708e-07
PLCL1	1.54333286510783e-11	0.289694	0.411	0.381	3.41601296362968e-07
VAMP2	1.61255067920484e-11	0.259532	0.195	0.166	3.56921967335199e-07
CLEC9A	1.6883184239284e-11	-0.261151	0.138	0.165	3.73692399952313e-07
CCDC73	1.79591510177664e-11	0.395463	0.077	0.057	3.97507848627242e-07
CDR2	1.84280031517245e-11	0.181409	0.29	0.256	4.0788542176027e-07
ST3GAL1	1.97955919159332e-11	-0.199255	0.405	0.436	4.38155631467264e-07
PPP1CA	1.99617572103151e-11	0.444182	0.083	0.063	4.41833534093115e-07
H2BC7	2.01293268230203e-11	-0.382288	0.056	0.074	4.45542519900732e-07
ENO4	2.03954320643069e-11	-0.245468	0.173	0.202	4.51432493311369e-07
TRAF3IP2-AS1	2.08153263192025e-11	0.164231	0.461	0.429	4.60726432749228e-07
PCDH11Y	2.08494090757784e-11	0.577287	0.052	0.036	4.6148082048328e-07
ZDHHC2	2.1075064332735e-11	0.178317	0.315	0.28	4.66475473940756e-07
PTAR1	2.1293843391831e-11	0.164613	0.374	0.338	4.71317929634788e-07
MNAT1	2.14476429727247e-11	-0.172368	0.388	0.421	4.74722129558288e-07
EXOC8	2.22933053518873e-11	0.488239	0.061	0.043	4.93440020658674e-07
ABCC5	2.23938060396514e-11	0.1652	0.366	0.33	4.95664502881644e-07
RRM2B	2.27090185831657e-11	0.186471	0.241	0.209	5.0264141731979e-07
CEBPZOS	2.34477468625983e-11	0.2157	0.197	0.167	5.1899242905675e-07
LINC02968	2.46845432243187e-11	-0.490457	0.04	0.056	5.4636767972707e-07
ASCC1	2.52148773181425e-11	0.180196	0.321	0.287	5.58106094559766e-07
IRF2BP2	2.79855833138701e-11	0.228607	0.222	0.191	6.19432901069201e-07
SLC5A3	2.8140039856906e-11	0.199823	0.199	0.168	6.22851642192757e-07
CD14	2.89855036157708e-11	0.296927	0.369	0.338	6.41565137031471e-07
DAB2	3.00125060522947e-11	0.279142	0.192	0.164	6.64296808961492e-07
SOCS5	3.05948003895681e-11	0.406495	0.076	0.057	6.771853118227e-07
SNTB1	3.14756740977683e-11	0.858835	0.033	0.021	6.96682570480003e-07
MACROD2	3.18539333260074e-11	0.160393	0.548	0.514	7.05054960237847e-07
SLC44A2	3.21821211459239e-11	0.244184	0.193	0.164	7.1231906944388e-07
TBC1D14	3.25572710187691e-11	-0.197214	0.732	0.735	7.20622636729436e-07
NFATC2	3.27052204882399e-11	-0.104459	0.788	0.801	7.23897350286702e-07
SLC25A25	3.32254437767068e-11	-0.258952	0.178	0.207	7.35411972553628e-07
CAPG	3.46025967517426e-11	0.308465	0.158	0.132	7.6589387650307e-07
CSF2RA	3.57785760203613e-11	-0.173157	0.611	0.633	7.91923001634678e-07
ADD3	3.58221457309761e-11	0.313934	0.146	0.12	7.92887373609424e-07
ZDHHC21	3.59098816533839e-11	-0.141178	0.49	0.523	7.94829320515999e-07
LINC01355	3.6220804769053e-11	0.342467	0.087	0.067	8.0171129275822e-07
VIM	3.63809523756813e-11	0.86312	0.041	0.027	8.0525599988333e-07
H4C8	3.82193636350192e-11	0.425919	0.053	0.037	8.45947394697516e-07
DAPK1	3.92131569287272e-11	0.335668	0.133	0.109	8.67944015460447e-07
NBEA	4.0565265544856e-11	0.101103	0.666	0.631	8.97871587569843e-07
GK	4.12093433138089e-11	0.228472	0.291	0.259	9.12127604907847e-07
RFX2	4.12464827509845e-11	0.305022	0.137	0.112	9.12949649210292e-07
GABRB2	4.27645617707303e-11	0.275688	0.239	0.209	9.46550810233345e-07
RECK	4.35488775555482e-11	0.15436	0.414	0.378	9.63910855814505e-07
USP24	4.43122650234738e-11	0.122817	0.677	0.651	9.8080767402957e-07
RBMS1	4.49258432842716e-11	0.119077	0.57	0.535	9.94388615254067e-07
C1QA	4.63883806604812e-11	0.125221	0.435	0.397	1.02676041753909e-06
CYBRD1	4.78615896718245e-11	0.2119	0.278	0.246	1.05936842579616e-06
ARL6IP6	4.86119368244231e-11	0.267415	0.197	0.169	1.07597660967178e-06
PRKD3	4.87283807962031e-11	0.118495	0.52	0.482	1.07855398054316e-06
UBXN1	5.03010567327628e-11	0.376121	0.097	0.076	1.11336358972297e-06
PPARG	5.08326658532615e-11	0.129195	0.288	0.254	1.12513022599609e-06
GAK	5.17104513257998e-11	-0.181535	0.42	0.45	1.14455912964525e-06
EVI2B	5.27071113204994e-11	0.253188	0.194	0.166	1.16661920196793e-06
DNAJC5	5.30147474194073e-11	-0.160351	0.567	0.587	1.17342841938116e-06
PABPN1	5.37557442345624e-11	0.164723	0.365	0.33	1.1898296428878e-06
HNRNPUL1	5.52665012065984e-11	0.206585	0.273	0.241	1.22326873770685e-06
CTSC	5.64808829077636e-11	0.142922	0.533	0.497	1.25014786228044e-06
LINC00544	5.7843089324504e-11	1.08821	0.016	0.008	1.28029893910857e-06
RPS19	7.20793113267543e-11	0.191432	0.546	0.521	1.59540347690638e-06
CFAP44	7.37647347013178e-11	0.303592	0.152	0.127	1.63270863787897e-06
SLC2A3	7.43874399198223e-11	-0.24416	0.237	0.267	1.64649159518535e-06
PCSK5	7.55580016687095e-11	0.295441	0.256	0.226	1.67240080893522e-06
CORO1B	7.63969652860092e-11	0.410237	0.08	0.061	1.69097042964053e-06
CELF4	8.10374228121153e-11	0.235317	0.154	0.128	1.79368231652336e-06
NFATC1	8.1722469402704e-11	-0.257448	0.191	0.219	1.80884513775945e-06
AAR2	8.38896188639365e-11	0.379756	0.077	0.058	1.85681282393437e-06
AEBP2	8.3991570416928e-11	0.141654	0.48	0.444	1.85906941960829e-06
LLPH	8.79824199969411e-11	0.369313	0.091	0.071	1.94740288421229e-06
HPSE2	8.9228562123556e-11	0.401872	0.042	0.028	1.97498499404279e-06
PCGF5	9.52375659024229e-11	0.211094	0.26	0.229	2.10798828368423e-06
SCRG1	9.70934886266844e-11	0.356473	0.085	0.066	2.14906727726303e-06
TPM2	9.93694387253752e-11	0.631471	0.036	0.024	2.19944315674745e-06
PACSIN2	1.00781808619886e-10	-0.129555	0.662	0.676	2.23070455199255e-06
PLAC8	1.03896066097759e-10	-0.579952	0.103	0.125	2.29963552700781e-06
RNF175	1.06546211125573e-10	0.336949	0.139	0.115	2.35829383705344e-06
DNAJC15	1.06773197146221e-10	0.175696	0.268	0.237	2.36331794563447e-06
PTK2	1.0934941019907e-10	-0.108285	0.701	0.728	2.42033984534621e-06
SYNE3	1.16296470807663e-10	0.396405	0.074	0.056	2.57410608485681e-06
THSD4	1.16511738937348e-10	0.589564	0.03	0.018	2.57887082963925e-06
ABCA1	1.17703582856521e-10	0.128047	0.424	0.388	2.60525110294623e-06
LEPROTL1	1.19264827048049e-10	0.251699	0.199	0.171	2.63980768188152e-06
PLEKHF2	1.1945029031069e-10	0.235181	0.196	0.168	2.64391272573681e-06
MMP2	1.20940818163259e-10	0.429303	0.06	0.043	2.67690406922558e-06
CPED1	1.23593074273801e-10	-0.214828	0.742	0.747	2.73560910597632e-06
LINC00996	1.25133004788168e-10	-0.688027	0.023	0.035	2.7696939279813e-06
MCPH1	1.25979670571809e-10	0.135179	0.453	0.416	2.78843402843641e-06
PSTPIP1	1.32662961434557e-10	0.412767	0.083	0.064	2.93636198839249e-06
UBE2F	1.36064011293643e-10	-0.194391	0.371	0.4	3.01164082597349e-06
BORCS7	1.45806130825704e-10	0.33867	0.096	0.075	3.22727289969614e-06
LRRC4C	1.48246844848428e-10	0.313366	0.332	0.298	3.28129566387511e-06
PRKX	1.48671393584921e-10	0.14653	0.348	0.313	3.29069262560865e-06
PRKG1	1.51680734256759e-10	0.1995	0.197	0.168	3.3573013720391e-06
ADM	1.52486120035048e-10	-1.13151	0.009	0.016	3.37512778085576e-06
LAMB2	1.52605442303666e-10	0.748051	0.026	0.015	3.37776885994934e-06
OIP5-AS1	1.59402037959427e-10	0.152569	0.361	0.327	3.52820470819396e-06
HLA-E	1.60426122532631e-10	0.161285	0.49	0.46	3.55087179613726e-06
PTPN22	1.61353840594914e-10	0.492423	0.058	0.042	3.57140590772782e-06
KLHDC2	1.6199129213413e-10	0.274063	0.166	0.14	3.58551526009683e-06
HMGN2	1.62944246937975e-10	-0.279698	0.108	0.131	3.60660796172513e-06
RPL36	1.65570972378761e-10	0.186511	0.255	0.224	3.6647479026315e-06
SRRM3	1.70148602256742e-10	0.281802	0.122	0.099	3.76606916235072e-06
HTR7	1.74910943948405e-10	0.536754	0.056	0.04	3.871478833354e-06
PLXNA1	1.76171190363337e-10	0.286458	0.147	0.122	3.8993731275021e-06
SPTBN4	1.7800596373849e-10	0.240289	0.194	0.166	3.93998400138775e-06
CEBPB	1.78136942500723e-10	0.181796	0.413	0.378	3.942883085311e-06
TARID	1.86985306224376e-10	1.20544	0.013	0.006	4.13873276797033e-06
STARD9	1.90288163562912e-10	0.224533	0.182	0.155	4.2118382123015e-06
RHOB	1.94231334697809e-10	-0.404186	0.082	0.102	4.29911636220131e-06
AIG1	2.02705503049932e-10	-0.135866	0.484	0.514	4.4866836045072e-06
KIFC2	2.11534584059596e-10	0.290978	0.144	0.12	4.68210648357509e-06
HS6ST1	2.1264717070385e-10	0.188776	0.275	0.243	4.70673247635901e-06
LMCD1-AS1	2.15807924366719e-10	-0.375371	0.118	0.141	4.77669259793296e-06
ELK3	2.24575253431368e-10	0.150046	0.358	0.323	4.9707486594499e-06
TMOD1	2.25682936540433e-10	0.147955	0.261	0.229	4.99526611738595e-06
SAT1	2.26344310778997e-10	-0.237468	0.835	0.848	5.00990497478231e-06
IRF1	2.3124573439151e-10	0.461891	0.082	0.063	5.11839308502167e-06
LILRA2	2.40096906883045e-10	0.301231	0.123	0.101	5.31430493694932e-06
YPEL1	2.41705795126466e-10	0.36282	0.086	0.066	5.34991606932919e-06
ATP1A2	2.47472263450988e-10	0.423961	0.051	0.036	5.47755107922417e-06
ANKUB1	2.527217297583e-10	-0.258886	0.333	0.36	5.59374276647021e-06
NEDD9	2.61405888307922e-10	-0.220944	0.283	0.314	5.78595793180755e-06
GPSM3	2.66695622522146e-10	0.290322	0.143	0.119	5.90304090890519e-06
MYLK-AS1	2.68591184743064e-10	0.345739	0.086	0.066	5.94499728310297e-06
ISCU	2.70207390143923e-10	0.280995	0.146	0.121	5.98077037344559e-06
SP140	2.71495948575446e-10	-0.220808	0.259	0.288	6.00929132576891e-06
STK17A	2.7691088020011e-10	0.183102	0.297	0.264	6.12914542234923e-06
MAZ	2.79391035509125e-10	0.340186	0.104	0.083	6.18404117995897e-06
HCG22	2.84391448818136e-10	-0.509546	0.05	0.066	6.29472032814062e-06
OSBPL6	2.8643815323275e-10	-0.169851	0.305	0.336	6.34002208365368e-06
TTC28	3.01328024854419e-10	-0.131273	0.631	0.655	6.6695945021277e-06
FCGR3A	3.06331844997741e-10	-0.215429	0.424	0.45	6.78034905718e-06
CPNE5	3.09338630784447e-10	0.514511	0.08	0.062	6.84690125378294e-06
TRIM73	3.19529821785291e-10	-0.315192	0.093	0.114	7.07247307539562e-06
IQGAP1	3.20772302997956e-10	0.194382	0.319	0.288	7.09997415455676e-06
PDGFB	3.23191795939584e-10	-0.199611	0.456	0.484	7.15352721132676e-06
KLHL21	3.4126285958613e-10	0.362556	0.096	0.076	7.5535121340794e-06
BICD1	3.49752447197727e-10	0.152868	0.425	0.39	7.74142066627449e-06
ETNK1	3.55457030115863e-10	-0.137864	0.538	0.567	7.86768590458452e-06
LINC01500	3.55662297368468e-10	0.383615	0.08	0.062	7.87222928995366e-06
PAXX	3.61079742172285e-10	0.348588	0.108	0.086	7.99213901324137e-06
ITPRIP	3.65683965268056e-10	0.223622	0.175	0.149	8.09404888724314e-06
CTSA	3.66611916152233e-10	0.330392	0.132	0.109	8.11458815211354e-06
TSPAN3	3.7565226706135e-10	0.198286	0.253	0.223	8.31468727913592e-06
SHISAL2A	3.7680728549142e-10	0.358226	0.096	0.076	8.34025245706708e-06
GPRC5C	3.79126115007252e-10	0.588162	0.044	0.031	8.39157742957052e-06
CASS4	3.8064038039143e-10	0.198777	0.267	0.237	8.42509417958392e-06
VGF	3.80795515762479e-10	-1.03292	0.007	0.014	8.4285279458867e-06
ZC3H14	3.89867870267289e-10	0.174412	0.3	0.269	8.62933544049617e-06
AHR	3.9899560742479e-10	0.544529	0.054	0.039	8.83136877474031e-06
TPGS2	4.05563255229609e-10	0.225215	0.152	0.127	8.97673709125217e-06
C2CD5-AS1	4.30897825022335e-10	-0.256986	0.153	0.179	9.53749245904436e-06
NR3C2	4.38956356737373e-10	0.177332	0.368	0.335	9.71586000002501e-06
UBXN2B	4.58972027645877e-10	0.186346	0.444	0.413	1.01588868599138e-05
KLHL24	4.67631622588734e-10	0.165412	0.396	0.364	1.0350558334379e-05
CREG1	4.83782320676016e-10	0.175886	0.355	0.322	1.07080378858429e-05
MARCHF8	4.8584720539386e-10	0.175802	0.246	0.215	1.07537420441877e-05
SKI	4.88884937926172e-10	-0.110031	0.655	0.676	1.08209792160579e-05
NHLRC2	4.8989240380329e-10	0.151023	0.385	0.351	1.0843278465782e-05
PPA1	4.92635067482852e-10	0.307077	0.177	0.151	1.09039845836654e-05
PRKCD	4.97777924394022e-10	0.153552	0.376	0.342	1.10178165785373e-05
ABTB1	5.01833242118209e-10	0.426442	0.074	0.057	1.11075769810444e-05
CAMK2B	5.14166403440119e-10	0.297731	0.115	0.093	1.13805591737436e-05
BIN2	5.20848306620708e-10	-0.17957	0.349	0.379	1.15284564187428e-05
CEPT1	5.37908935613781e-10	0.143667	0.412	0.377	1.19060763808754e-05
LGALS3	5.39649748778085e-10	0.522168	0.043	0.029	1.19446075394541e-05
PSTPIP2	5.48577011584872e-10	0.212548	0.286	0.257	1.21422035744196e-05
BCL2L2-PABPN1	5.49252502921718e-10	0.278855	0.138	0.115	1.21571548996693e-05
TIAM2	5.74076660610987e-10	0.13669	0.46	0.424	1.27066128059636e-05
SELL	5.76832668022975e-10	-0.534576	0.042	0.057	1.27676142740205e-05
ZNF215	5.83279013079568e-10	-0.676011	0.014	0.024	1.29102976755031e-05
GIMAP8	5.8695535505777e-10	0.192045	0.259	0.229	1.29916698288487e-05
LRFN4	5.95898658306385e-10	0.727481	0.03	0.019	1.31896209029535e-05
FAM168A	5.98796651917563e-10	-0.112074	0.75	0.759	1.32537650935433e-05
ACTA2	5.99399286943141e-10	0.357281	0.108	0.087	1.32671038171995e-05
SGSM3	6.17077051753246e-10	0.296706	0.123	0.1	1.36583834635063e-05
WDR70	6.24000358992542e-10	-0.103018	0.771	0.781	1.38116239459409e-05
AP2M1	6.77404638711727e-10	0.258431	0.148	0.124	1.49936742732454e-05
BCAP29	6.85810352857435e-10	0.207645	0.213	0.185	1.51797263501465e-05
ABHD13	6.86233417389865e-10	0.21684	0.18	0.154	1.51890904605073e-05
LINC00472	7.02807600987776e-10	0.193223	0.293	0.262	1.55559434402634e-05
GCA	7.04978130886207e-10	0.149692	0.351	0.318	1.56039859490353e-05
HCG17	7.17326497090662e-10	0.233003	0.181	0.155	1.58773046866047e-05
KCNQ5	7.29091467495598e-10	0.16199	0.392	0.359	1.61377105415476e-05
SEM1	7.33366604381963e-10	0.177546	0.308	0.276	1.62323364213904e-05
GALNT7	7.36658948842445e-10	0.205344	0.345	0.316	1.63052091736787e-05
ATP8A1	7.38034009109376e-10	0.17811	0.3	0.269	1.63356447576269e-05
IGF1R	7.82800859020285e-10	0.148042	0.339	0.306	1.7326514213555e-05
ITGA5	7.84001537749424e-10	0.2333	0.184	0.158	1.73530900365458e-05
BET1	7.86774062432992e-10	0.251823	0.142	0.119	1.74144570978918e-05
XPR1	8.05458797583229e-10	0.10861	0.557	0.523	1.78280250257072e-05
TRABD	8.40009467810112e-10	0.22826	0.207	0.18	1.8592769560509e-05
STARD10	8.51594482967557e-10	0.749444	0.024	0.014	1.88491922860039e-05
TMEM219	8.78239774625525e-10	0.242993	0.15	0.126	1.94389591715614e-05
CABLES1	8.83878535054232e-10	0.17006	0.304	0.272	1.95637674948904e-05
ENOX2	9.17314592963108e-10	0.184224	0.348	0.316	2.03038412006454e-05
AZIN2	9.36436516086482e-10	-0.331935	0.185	0.21	2.07270858470582e-05
AVEN	9.50702234538066e-10	0.268411	0.155	0.131	2.10428432592655e-05
NPC2	9.61184396028266e-10	0.197363	0.272	0.242	2.12748554216896e-05
GFOD1	9.82419353769585e-10	0.266044	0.127	0.104	2.1744869976336e-05
BCORL1	1.00589692529651e-09	0.31618	0.109	0.088	2.2264522544513e-05
ATP6V0C	1.01207965168758e-09	0.192908	0.266	0.236	2.24013710104528e-05
CHSY3	1.01948401360298e-09	0.131197	0.648	0.622	2.25652591570884e-05
INTS6-AS1	1.02254344428434e-09	0.293246	0.12	0.098	2.26329765957895e-05
RPLP1	1.04391438183744e-09	0.155825	0.427	0.394	2.31060009275899e-05
CBX7	1.06291399494374e-09	0.24627	0.155	0.13	2.35265383640848e-05
STX6	1.0853796295385e-09	0.150653	0.416	0.384	2.40237927202051e-05
MIR100HG	1.09859844108327e-09	-0.375805	0.182	0.205	2.43163778949371e-05
GREM1	1.11739586008936e-09	0.698665	0.026	0.016	2.47324399672178e-05
TBC1D2B	1.16099186961171e-09	0.116311	0.555	0.525	2.56973940419856e-05
PIGT	1.1662859458009e-09	0.281669	0.135	0.112	2.58145731243571e-05
ACAP3	1.22633488535445e-09	0.247005	0.149	0.125	2.71436963524353e-05
LMBR1	1.23967565855275e-09	0.142234	0.379	0.345	2.74389810264065e-05
ITGB5	1.30864558518477e-09	-0.201631	0.376	0.403	2.89655613824798e-05
ADSS1	1.32373502488083e-09	-0.742456	0.018	0.028	2.92995510407122e-05
SPOP	1.32667455911756e-09	0.140237	0.347	0.313	2.93646146915082e-05
NRARP	1.34934577046872e-09	-1.05938	0.006	0.012	2.98664192835546e-05
ACACA	1.37180883651757e-09	0.151111	0.444	0.412	3.036361678748e-05
NPIPB15	1.37579704217269e-09	0.508727	0.044	0.031	3.04518917314503e-05
ANXA2	1.38556428311357e-09	0.52427	0.056	0.041	3.06680798424359e-05
LPCAT4	1.42429462144773e-09	0.335993	0.093	0.074	3.1525337151124e-05
STXBP5	1.44041922928158e-09	0.141775	0.442	0.411	3.18822392209184e-05
ANGPTL5	1.44185237573866e-09	1.07939	0.013	0.006	3.19139604845994e-05
CDKN2B	1.45673495126897e-09	0.590892	0.03	0.019	3.22433714113873e-05
HK3	1.51390447778769e-09	-0.639664	0.015	0.024	3.35087617113527e-05
VASP	1.56330764880432e-09	0.194289	0.207	0.18	3.46022514986348e-05
KIAA0040	1.61650779994625e-09	0.424351	0.062	0.046	3.57797836440103e-05
CNTNAP5	1.6317805740916e-09	0.183731	0.241	0.212	3.61178312269435e-05
RHOQ-AS1	1.63560499067896e-09	-0.329368	0.133	0.155	3.62024808636882e-05
PALM2AKAP2	1.68115147843739e-09	0.226384	0.164	0.139	3.72106068237332e-05
ACVR2B	1.70252809065779e-09	0.262647	0.115	0.093	3.76837567586196e-05
AP1G2	1.72270239181474e-09	0.281983	0.139	0.116	3.81302947404275e-05
WDR37	1.73807558086934e-09	-0.155887	0.442	0.47	3.84705649069619e-05
RABAC1	1.79110236503654e-09	0.403505	0.084	0.066	3.96442597477187e-05
U2AF2	1.7929108549482e-09	0.259207	0.166	0.142	3.96842888634234e-05
ECT2	1.85323662261871e-09	0.41213	0.081	0.063	4.10195394050425e-05
STX10	1.86555430792359e-09	0.407471	0.067	0.05	4.12921790515807e-05
PIM1	1.89689837371018e-09	0.209598	0.19	0.164	4.19859486037012e-05
INO80E	1.9067754078035e-09	0.2735	0.13	0.108	4.22045668763228e-05
DIAPH2-AS1	1.96820764195295e-09	-0.287346	0.187	0.213	4.35643079469867e-05
KMT2A	2.01074206146648e-09	0.108392	0.499	0.464	4.45057647884992e-05
TENM2	2.02342331300788e-09	0.120366	0.407	0.373	4.47864516101164e-05
DDIT4	2.10062922531154e-09	0.151569	0.231	0.202	4.64953272730456e-05
STS	2.11257800408208e-09	0.326256	0.134	0.112	4.67598015423527e-05
GALNT7-DT	2.11471711706368e-09	0.284015	0.136	0.113	4.68071486690875e-05
CLEC7A	2.11810130144088e-09	0.106225	0.479	0.444	4.68820542060925e-05
SPATA20	2.15302813810506e-09	0.408098	0.066	0.05	4.76551248088174e-05
SEC23B	2.17254116715117e-09	-0.250409	0.173	0.199	4.8087026193724e-05
LIX1L	2.19977783884972e-09	0.313739	0.096	0.077	4.86898826850997e-05
CDK14	2.20666387708575e-09	0.249061	0.206	0.18	4.8842298255416e-05
TMEM14C	2.2662118670182e-09	0.297943	0.108	0.087	5.01603334645808e-05
MOCOS	2.27788063340216e-09	-0.378247	0.05	0.066	5.04186099397235e-05
LINC01141	2.28496037158653e-09	-0.225065	0.418	0.437	5.05753128646962e-05
FAM174B	2.34589103038508e-09	0.287656	0.132	0.11	5.19239520665433e-05
XRRA1	2.35828422066685e-09	-0.193969	0.225	0.253	5.21982629402401e-05
LINC02976	2.37114114181413e-09	0.22892	0.183	0.158	5.24828380329139e-05
PMFBP1	2.38858630825399e-09	0.386016	0.076	0.059	5.28689693468939e-05
CCDC69	2.39310765512847e-09	0.282482	0.114	0.093	5.29690448386135e-05
MELK	2.4100926310305e-09	0.954946	0.015	0.007	5.3344990295229e-05
ST6GALNAC6	2.4125728744871e-09	0.367907	0.086	0.068	5.33998880038975e-05
EIF2AK4	2.42085903890176e-09	0.149779	0.342	0.31	5.35832939670516e-05
PTPN6	2.43259966199016e-09	0.305097	0.118	0.097	5.38431609184901e-05
ECHDC3	2.57820514871535e-09	0.341181	0.106	0.086	5.70659927616656e-05
MRPL38	2.63312846367005e-09	0.35774	0.082	0.064	5.82816654148728e-05
TMEM30A	2.69992351375831e-09	0.194218	0.253	0.224	5.97601070535263e-05
NIPA1	2.74703119575829e-09	0.309482	0.105	0.085	6.0802788486914e-05
GSDMD	2.78514362407889e-09	0.313679	0.107	0.087	6.16463689753621e-05
PDGFC	2.81225765577299e-09	0.137453	0.475	0.442	6.22465109528794e-05
POLR1D	2.86678586924319e-09	0.205499	0.196	0.169	6.34534384298288e-05
WFS1	2.88739398514152e-09	0.528529	0.047	0.033	6.39095784671223e-05
RASSF2	2.8942062040406e-09	0.141222	0.474	0.441	6.40603601202346e-05
PHF3	2.96697093359704e-09	0.121329	0.519	0.491	6.56709346442368e-05
KIAA0930	3.03870941058961e-09	0.125191	0.383	0.349	6.72587940939905e-05
TIAL1	3.11113309164212e-09	0.140162	0.37	0.337	6.88618198504067e-05
ACY3	3.17422855189413e-09	0.439207	0.056	0.041	7.02583747676247e-05
CACNA1C	3.17955444058856e-09	0.157897	0.281	0.251	7.03762579879871e-05
FGFR1OP2	3.18337069885121e-09	0.146883	0.355	0.323	7.04607270483727e-05
PPM1G	3.19423166284226e-09	0.231143	0.157	0.133	7.07011236253506e-05
LINC02112	3.20558201723943e-09	0.648765	0.025	0.015	7.09523523695776e-05
ABCA12	3.23802868484928e-09	1.23208	0.011	0.005	7.16705269104539e-05
AVIL	3.25840810574528e-09	0.311486	0.089	0.071	7.21216050125661e-05
SLC39A10	3.28745083542354e-09	0.12509	0.466	0.433	7.27644367912647e-05
EPIC1	3.32307862569814e-09	0.217649	0.146	0.123	7.35530223012025e-05
SLC18B1	3.50066963133836e-09	0.149526	0.294	0.263	7.74838216200434e-05
ANKRD22	3.62162675541006e-09	0.208098	0.2	0.174	8.01610866042463e-05
TBX19	3.62802740237465e-09	0.310441	0.127	0.106	8.03027585241605e-05
WBP1	3.71078338709365e-09	0.377294	0.084	0.066	8.21344794899308e-05
H2AZ2	3.75106475393072e-09	0.232547	0.173	0.149	8.30260672635024e-05
MEGF9	3.88878518109483e-09	0.20267	0.28	0.252	8.60743711983529e-05
ZNF688	3.93013485916935e-09	0.502544	0.044	0.031	8.69896049728544e-05
LINC02207	3.9362015510256e-09	0.545845	0.05	0.036	8.71238851304007e-05
ZNF22	3.95347713797204e-09	0.328597	0.094	0.075	8.75062629718732e-05
PRKAA1	4.05329841108536e-09	0.205704	0.206	0.18	8.97157070309635e-05
DCK	4.161842083711e-09	0.261577	0.128	0.106	9.21182126808593e-05
ZNF710	4.19111116949507e-09	-0.110036	0.791	0.794	9.27660546256038e-05
CHASERR	4.31209687089338e-09	-0.191296	0.366	0.391	9.54439521403541e-05
ZNF385A	4.41495947155232e-09	0.388111	0.095	0.077	9.7720712943339e-05
PTDSS1	4.47159481459791e-09	0.231272	0.165	0.141	9.89742796263102e-05
WARS1	4.53594324430419e-09	-0.192133	0.171	0.197	0.000100399
PHLPP1	4.61781862597696e-09	0.140843	0.26	0.231	0.000102211
SLC5A4-AS1	4.63616114823907e-09	0.443274	0.07	0.054	0.000102617
SPIN1	4.64062282406567e-09	-0.147031	0.514	0.536	0.000102716
RAB31	4.67993760487739e-09	-0.151792	0.819	0.824	0.000103586
LINC02975	4.69736877397433e-09	0.175117	0.234	0.206	0.000103972
ZBED5	4.74362753588713e-09	0.158434	0.294	0.265	0.000104995
EBPL	4.7717531414073e-09	0.319556	0.102	0.083	0.000105618
PTPRT	4.82423577067798e-09	0.170756	0.214	0.187	0.00010678
UBE2H	4.93556179184299e-09	-0.161204	0.472	0.493	0.000109244
MROH7	5.04994575530639e-09	0.329629	0.102	0.083	0.000111775
MYT1L	5.14875906600825e-09	0.156998	0.261	0.232	0.000113963
GPX4	5.15215084357242e-09	0.246566	0.181	0.157	0.000114038
NFIX	5.18403489119032e-09	0.247245	0.148	0.125	0.000114743
C1orf54	5.21472947726791e-09	-0.348768	0.079	0.097	0.000115423
GPR108	5.25491544476567e-09	0.364065	0.083	0.066	0.000116312
RNF125	5.27599484680152e-09	0.172468	0.265	0.236	0.000116779
TMEM9B-AS1	5.30575196510589e-09	0.234717	0.164	0.14	0.000117438
TMEM106A	5.38165696015483e-09	-0.179474	0.312	0.338	0.000119118
SUPT16H	5.3921291875947e-09	0.218296	0.186	0.161	0.000119349
PGBD5	5.39355882590823e-09	0.237888	0.163	0.139	0.000119381
IL15RA	5.64269960969773e-09	0.251418	0.134	0.112	0.000124896
NFASC	5.86474444520801e-09	0.255796	0.123	0.102	0.00012981
PICK1	5.92731521443638e-09	0.369735	0.084	0.067	0.000131195
TGFB1	6.0389310041992e-09	0.113304	0.487	0.455	0.000133666
PRKRA	6.13133140197881e-09	0.217067	0.19	0.165	0.000135711
MIAT	6.17653606815382e-09	0.171983	0.23	0.202	0.000136711
NISCH	6.37399177556251e-09	0.202912	0.227	0.2	0.000141082
APOE	6.37545719169285e-09	0.202919	0.663	0.645	0.000141114
HSPA12A	6.44195495100185e-09	0.187447	0.173	0.148	0.000142586
ADGRD1	6.45581251306212e-09	0.380352	0.068	0.052	0.000142893
PYGL	6.47219486660035e-09	0.124474	0.393	0.36	0.000143256
ARHGDIA	6.48185486663823e-09	0.325113	0.127	0.107	0.000143469
FGR	6.51592129877278e-09	0.245824	0.132	0.111	0.000144223
ZNF429	6.66162705006495e-09	0.282645	0.115	0.094	0.000147448
GRIP1	6.79096555231869e-09	0.238584	0.234	0.207	0.000150311
CBWD2	6.95849925632894e-09	-0.278555	0.217	0.241	0.000154019
LGALS9	7.0440962389592e-09	0.146725	0.361	0.33	0.000155914
CEP85L	7.20093129542512e-09	-0.13029	0.408	0.438	0.000159385
ZNF358	7.23193617530932e-09	0.34857	0.088	0.07	0.000160072
TMEM19	7.2579815924535e-09	0.291524	0.114	0.094	0.000160648
IL4I1	7.2963588634588e-09	-0.729868	0.027	0.038	0.000161498
RFX3	7.3357156365286e-09	0.124892	0.687	0.664	0.000162369
NAALADL2	7.35502017859486e-09	-0.12806	0.459	0.49	0.000162796
CFD	7.37798015530256e-09	0.385568	0.069	0.053	0.000163304
IGSF22-AS1	7.79260983708042e-09	0.643579	0.032	0.021	0.000172482
CYTIP	8.11263987961074e-09	-0.387458	0.172	0.195	0.000179565
HAGHL	8.14328131205018e-09	0.456544	0.058	0.044	0.000180243
LINC02224	8.19770747140274e-09	0.56744	0.033	0.022	0.000181448
H2AC6	8.26006592444947e-09	0.225304	0.51	0.489	0.000182828
ZBTB37	8.42206240579174e-09	0.160914	0.254	0.225	0.000186414
LAMTOR5-AS1	8.59181357137864e-09	0.206326	0.19	0.165	0.000190171
LINC02937	8.73500532025357e-09	0.379966	0.083	0.066	0.000193341
HMGN1	8.74717445680443e-09	-0.187156	0.284	0.31	0.00019361
PELI2	9.11799690161842e-09	0.142643	0.434	0.404	0.000201818
GPR65	9.17832655406792e-09	0.198366	0.219	0.193	0.000203153
PCF11	9.28554614541925e-09	0.139684	0.372	0.34	0.000205526
MAPK3	9.47788677061537e-09	0.322131	0.097	0.078	0.000209784
MTIF2	9.51390446306766e-09	0.248821	0.143	0.121	0.000210581
GAS2L1	9.57128682079196e-09	0.55924	0.038	0.026	0.000211851
CERS5	9.84474893710527e-09	0.186475	0.226	0.199	0.000217904
KLKB1	9.9359307512423e-09	0.65314	0.035	0.024	0.000219922
IL1A	1.02746653705363e-08	-0.425716	0.033	0.046	0.000227419
PDZRN3	1.05685165670282e-08	0.214883	0.139	0.117	0.000233924
TAPBP	1.05811740115346e-08	0.167278	0.287	0.258	0.000234204
ESYT1	1.05912139003353e-08	0.294978	0.1	0.081	0.000234426
LINC00621	1.06157924590549e-08	0.618134	0.054	0.04	0.00023497
GSTM3	1.07285917104286e-08	0.403433	0.062	0.047	0.000237467
IRF5	1.07928711414645e-08	0.204767	0.203	0.177	0.000238889
CD247	1.08853222371857e-08	0.455922	0.062	0.048	0.000240936
WDR19	1.1020229483294e-08	0.273569	0.126	0.105	0.000243922
RACK1	1.11831803534317e-08	0.18497	0.273	0.245	0.000247529
ME3	1.14648191243592e-08	0.298195	0.129	0.108	0.000253762
SSB	1.14656319415805e-08	0.237224	0.138	0.116	0.00025378
ZNF589	1.15185266903615e-08	0.286668	0.107	0.087	0.000254951
HDAC10	1.15986918745678e-08	0.310219	0.099	0.08	0.000256725
PPP5C	1.165985294765e-08	0.198155	0.166	0.142	0.000258079
SH3BGRL	1.19182580199079e-08	-0.113117	0.749	0.758	0.000263799
MAP4	1.21599998171203e-08	0.106053	0.504	0.468	0.000269149
CASTOR3	1.22091081255901e-08	0.19058	0.177	0.152	0.000270236
MAN2A1	1.25018098721515e-08	0.164879	0.687	0.662	0.000276715
DDX46	1.260250420158e-08	0.136864	0.35	0.318	0.000278944
ENTPD1-AS1	1.26891879037846e-08	-0.160171	0.521	0.546	0.000280862
ATG7	1.28534684707534e-08	0.116808	0.866	0.86	0.000284499
RASSF5	1.29308015968248e-08	-0.261815	0.161	0.184	0.00028621
CIITA	1.3065263195701e-08	0.107429	0.643	0.611	0.000289187
CCL3	1.32100672709246e-08	-0.524491	0.012	0.02	0.000292392
MROH6	1.34943568440536e-08	0.60943	0.029	0.019	0.000298684
LRRC37A3	1.35791685648983e-08	0.195013	0.194	0.169	0.000300561
PLAUR	1.4057285389174e-08	-0.257479	0.179	0.203	0.000311144
PSMG4	1.40903278019245e-08	0.21027	0.144	0.121	0.000311875
CD46	1.41056551603036e-08	0.152716	0.314	0.284	0.000312215
HTT	1.42032315638553e-08	-0.134686	0.475	0.501	0.000314374
ROBO3	1.47952878383899e-08	0.282094	0.127	0.107	0.000327479
ECE1	1.50777195351524e-08	0.503682	0.038	0.027	0.00033373
EGR1	1.5125969809321e-08	-0.691008	0.01	0.018	0.000334798
HEXIM1	1.52578763810743e-08	0.381373	0.063	0.048	0.000337718
P2RY11	1.54784045445143e-08	0.353703	0.082	0.065	0.000342599
RBM42	1.54975621644793e-08	0.50951	0.038	0.026	0.000343023
ADORA3	1.55150172400991e-08	0.179449	0.267	0.24	0.000343409
MYO9A	1.59698567005795e-08	0.134385	0.423	0.393	0.000353477
NPL	1.62189232933003e-08	-0.11758	0.727	0.74	0.00035899
SCAMP2	1.63852829871044e-08	0.144076	0.387	0.357	0.000362672
ARHGEF25	1.64527341668822e-08	0.584804	0.032	0.021	0.000364165
RAB5C	1.66688261648377e-08	0.196891	0.219	0.193	0.000368948
ZNF254	1.67048114383706e-08	0.138916	0.358	0.329	0.000369744
ITGB3BP	1.67215702820973e-08	-0.242249	0.163	0.186	0.000370115
PSMA1	1.69293561883233e-08	-0.142674	0.552	0.577	0.000374714
CARD11	1.71251314111556e-08	0.116565	0.474	0.442	0.000379048
RNASE6	1.72484732041189e-08	0.309244	0.12	0.1	0.000381778
ABI1	1.75201773224578e-08	-0.128768	0.668	0.684	0.000387792
CROCC	1.76626634063276e-08	0.214201	0.19	0.165	0.000390945
EIF3G	1.7786034130861e-08	0.358327	0.081	0.064	0.000393676
PEX26	1.77996906110678e-08	0.216917	0.169	0.146	0.000393978
SARAF	1.78884618063972e-08	0.132835	0.452	0.422	0.000395943
TMEM220	1.80141639828996e-08	0.263222	0.15	0.128	0.000398726
S100A8	1.80605861051113e-08	-0.266506	0.036	0.048	0.000399753
NGF	1.83149988398354e-08	1.00038	0.013	0.007	0.000405384
ANKRD16	1.871414946569e-08	0.301574	0.1	0.082	0.000414219
CACNA1E	1.88370576666543e-08	0.241235	0.128	0.107	0.000416939
NEUROD1	1.9181546419682e-08	1.03317	0.013	0.006	0.000424564
ST8SIA4	1.92306804920067e-08	0.101938	0.706	0.685	0.000425652
L3HYPDH	1.97024782701636e-08	0.290191	0.113	0.094	0.000436095
HSPA4L	1.983315948549e-08	-0.475974	0.056	0.071	0.000438987
TRIM56	2.03453837569465e-08	0.147771	0.31	0.28	0.000450325
APBA1	2.0347567904428e-08	-0.158218	0.484	0.507	0.000450373
YWHAB	2.07333497640397e-08	0.157838	0.317	0.289	0.000458912
BTAF1	2.07908992070482e-08	-0.150308	0.492	0.516	0.000460186
ALG13-AS1	2.1257442560855e-08	-0.404234	0.058	0.074	0.000470512
GTDC1	2.20074998070804e-08	0.127467	0.625	0.596	0.000487114
SLC20A1	2.20933958388351e-08	0.197435	0.222	0.197	0.000489015
CLDN12	2.24799620091045e-08	0.315768	0.075	0.059	0.000497571
TMCO1	2.24912718315807e-08	0.23323	0.158	0.136	0.000497822
FAM131B-AS2	2.25497294143196e-08	0.838216	0.016	0.009	0.000499116
ZNF267	2.26726361483625e-08	-0.214665	0.23	0.256	0.000501836
MVB12A	2.35775788445364e-08	0.376797	0.08	0.064	0.000521866
LINC02800	2.36128530501071e-08	0.899905	0.014	0.007	0.000522647
DPY19L1	2.36983325811759e-08	0.193626	0.207	0.183	0.000524539
LINC01322	2.37289721028061e-08	0.237312	0.117	0.097	0.000525217
SMC6	2.38306017916933e-08	0.21508	0.213	0.189	0.000527467
SLC36A1	2.39090873114287e-08	0.190552	0.191	0.166	0.000529204
COL9A2	2.39477563113395e-08	0.255454	0.122	0.102	0.00053006
ARFIP1	2.41606528988835e-08	-0.133653	0.45	0.476	0.000534772
SERPINB6	2.46505092658969e-08	-0.11745	0.511	0.536	0.000545614
ST14	2.47763241323497e-08	0.295073	0.103	0.085	0.000548399
MGAT5B	2.50961734837914e-08	0.452225	0.053	0.04	0.000555479
GPC5	2.5118369357488e-08	0.110565	0.154	0.132	0.00055597
FOSB	2.52243860983917e-08	-0.960952	0.005	0.01	0.000558317
CDC25B	2.53075171200291e-08	0.373794	0.068	0.053	0.000560157
ZNF219	2.58073122543611e-08	0.399682	0.057	0.043	0.000571219
CPNE1	2.58535650719842e-08	0.175833	0.255	0.228	0.000572243
RNGTT	2.58892224171792e-08	-0.128102	0.468	0.495	0.000573032
TEX2	2.5897367743919e-08	0.220136	0.195	0.171	0.000573212
FAM110A	2.61356710668954e-08	0.459753	0.052	0.039	0.000578487
KLHL6	2.62495586448542e-08	0.169686	0.391	0.363	0.000581008
TGFBI	2.68218364026975e-08	0.319318	0.108	0.089	0.000593675
HTR1E	2.69135635759229e-08	0.331925	0.064	0.05	0.000595705
CCL20	2.71297000158632e-08	-1.31799	0.009	0.015	0.000600489
AS3MT	2.72840204595572e-08	0.502797	0.035	0.024	0.000603905
GSK3A	2.76036744584966e-08	0.36508	0.068	0.053	0.00061098
ZNF692	2.76491604324292e-08	0.279319	0.108	0.089	0.000611987
SYT9-AS1	2.77297166060488e-08	0.362469	0.094	0.077	0.00061377
LINC01605	2.80895797472666e-08	-0.327589	0.08	0.098	0.000621735
ATF7	2.84253215832227e-08	0.106592	0.409	0.376	0.000629166
APEX2	2.86187096925679e-08	0.491486	0.039	0.028	0.000633447
RBM44	2.93960124240084e-08	0.546489	0.032	0.021	0.000650651
DNAJC13	2.9439020874251e-08	-0.137177	0.532	0.553	0.000651603
CDKN1A	2.98528404971729e-08	-0.248124	0.141	0.162	0.000660763
UBAP2	3.01175799176891e-08	0.154404	0.308	0.28	0.000666623
RELA	3.02375401056461e-08	0.288085	0.095	0.077	0.000669278
DIP2C	3.04460895935055e-08	0.156769	0.384	0.354	0.000673894
ACTN4	3.05576447044173e-08	0.175738	0.235	0.208	0.000676363
GARNL3	3.07071371297874e-08	0.114318	0.448	0.415	0.000679672
ZNF770	3.07814641225654e-08	0.21999	0.135	0.114	0.000681317
ARMC8	3.09486670862931e-08	0.127625	0.423	0.394	0.000685018
RPL32	3.10258630124875e-08	-0.223265	0.267	0.292	0.000686726
TAMALIN	3.16658113230448e-08	-0.476742	0.039	0.052	0.000700891
PRKCQ	3.21584804667691e-08	-0.373695	0.065	0.081	0.000711796
SLC35F4	3.2403375018455e-08	0.50303	0.039	0.028	0.000717216
TRIM61	3.27794775679459e-08	0.90839	0.014	0.008	0.000725541
SOWAHC	3.35598999053509e-08	0.854937	0.015	0.008	0.000742815
OTULIN	3.43450441162788e-08	-0.1757	0.274	0.3	0.000760193
MYOCOS	3.55184449043075e-08	0.677436	0.027	0.018	0.000786165
CERS2	3.68896594307081e-08	0.340955	0.09	0.073	0.000816516
NKAIN3	3.71322388962945e-08	0.244833	0.067	0.052	0.000821885
TCP11L2	3.71749133432713e-08	0.308608	0.105	0.086	0.00082283
CC2D2B	3.82531476898269e-08	0.289452	0.204	0.182	0.000846695
ADAP2	3.86055729423299e-08	-0.125708	0.531	0.549	0.000854496
LINC00871	3.88912403239301e-08	0.779528	0.018	0.01	0.000860819
VPS36	3.89221669125471e-08	0.137952	0.325	0.295	0.000861503
BCL6	3.92906202416786e-08	-0.232491	0.324	0.346	0.000869659
MAP3K13	3.98715184226105e-08	-0.220466	0.162	0.185	0.000882516
RPS25	4.02466509254329e-08	-0.210377	0.253	0.278	0.000890819
DCBLD2	4.04379567726269e-08	0.219233	0.134	0.113	0.000895054
PKM	4.05710831247712e-08	0.155398	0.338	0.31	0.000898
MRPS6	4.10822274241449e-08	0.167785	0.212	0.187	0.000909314
SPSB3	4.13529382391153e-08	0.300017	0.084	0.067	0.000915306
EIPR1	4.14476999831775e-08	-0.195554	0.233	0.258	0.000917403
RPS27L	4.21431564487218e-08	0.214958	0.23	0.206	0.000932797
CRISPLD2	4.22088508653534e-08	0.652004	0.028	0.018	0.000934251
JUND	4.27680306254626e-08	0.209543	0.205	0.18	0.000946628
SLC7A6	4.2819748795188e-08	-0.169897	0.399	0.421	0.000947772
SERPINF2	4.28894875827712e-08	0.397786	0.061	0.047	0.000949316
IK	4.5161565656993e-08	0.31786	0.093	0.075	0.000999606
ASB3	4.54740550754405e-08	0.133238	0.486	0.459	0.00100652
RPL10	4.56116088292362e-08	0.163458	0.413	0.387	0.00100957
TMEM63B	4.58420620855398e-08	0.25139	0.153	0.132	0.00101467
RBM12	4.6086702139946e-08	0.22685	0.128	0.107	0.00102008
FBXO32	4.66856641322928e-08	0.37842	0.08	0.064	0.00103334
GLYATL1	4.69868457473837e-08	0.494822	0.035	0.024	0.00104001
MT3	4.75035207679061e-08	-0.315609	0.079	0.096	0.00105144
ATP5F1D	4.82115413720188e-08	0.262018	0.133	0.112	0.00106711
PATJ	4.83326010571147e-08	0.252303	0.152	0.131	0.00106979
CCNL2	4.8764976433341e-08	0.187695	0.238	0.213	0.00107936
PKD1L3	4.92538004798358e-08	0.620853	0.023	0.015	0.00109018
NOTCH2	5.10403662894797e-08	0.13886	0.412	0.384	0.00112973
ZNF33A	5.10825263265739e-08	0.120188	0.453	0.422	0.00113066
ACIN1	5.16737794489844e-08	0.106426	0.432	0.399	0.00114375
SREK1IP1	5.17305471784261e-08	0.187066	0.16	0.137	0.001145
SMAD5	5.35899783531124e-08	0.150551	0.284	0.256	0.00118616
FBXO30	5.37117862975658e-08	0.293716	0.099	0.081	0.00118886
CD68	5.38680777485983e-08	0.249607	0.184	0.162	0.00119232
IKZF2	5.42870641702516e-08	0.222305	0.306	0.279	0.00120159
ARRDC2	5.52200494662291e-08	0.221678	0.175	0.153	0.00122224
SLC7A5	5.59697902992437e-08	-0.204065	0.209	0.233	0.00123884
HLF	5.61931771020203e-08	0.363204	0.053	0.04	0.00124378
IBTK	5.71524290227554e-08	-0.129033	0.441	0.467	0.00126501
S100A9	5.71680933224183e-08	-0.404001	0.034	0.046	0.00126536
FAM106A	5.78592718685001e-08	-0.186365	0.186	0.21	0.00128066
ZRSR2	5.84405644138614e-08	0.196486	0.221	0.196	0.00129352
PIN4	5.95515900166502e-08	0.227442	0.149	0.128	0.00131811
ABHD5	5.95800133597875e-08	0.288925	0.095	0.077	0.00131874
CD9	6.01324245139734e-08	0.210039	0.075	0.06	0.00133097
CCM2	6.05813517432516e-08	0.102691	0.501	0.472	0.00134091
ACER3	6.07394565511545e-08	0.102354	0.589	0.557	0.00134441
PIGM	6.07426323806799e-08	0.301114	0.088	0.072	0.00134448
PTGES3	6.08186718111431e-08	-0.249804	0.45	0.464	0.00134616
MKNK1-AS1	6.0831260531688e-08	-0.423187	0.037	0.049	0.00134644
CLEC5A	6.19468264581029e-08	0.16843	0.177	0.154	0.00137113
CDK16	6.28394706075645e-08	0.318165	0.074	0.058	0.00139089
GNG5	6.35800457332264e-08	0.248778	0.128	0.108	0.00140728
SYS1	6.38420302455188e-08	0.41035	0.056	0.043	0.00141308
INPP4B	6.46242305070638e-08	0.229616	0.248	0.223	0.00143039
MYO10	6.47294472298573e-08	0.210497	0.17	0.148	0.00143272
AGBL1	6.57167412949376e-08	0.461792	0.043	0.031	0.00145457
ARHGAP10	6.5782202647251e-08	0.460113	0.052	0.039	0.00145602
CEP128	6.58547283083496e-08	0.175534	0.333	0.306	0.00145763
GOLGA4	6.59030207968187e-08	-0.122705	0.757	0.767	0.0014587
BDNF-AS	6.6622220168879e-08	-0.39653	0.058	0.073	0.00147462
AP5M1	6.75777929301482e-08	0.207187	0.173	0.151	0.00149577
FAR1	6.77469687307309e-08	0.114305	0.506	0.481	0.00149951
HHIPL1	6.83638678628132e-08	-0.395902	0.038	0.05	0.00151317
H2BC15	6.98622654917512e-08	0.518598	0.036	0.025	0.00154633
TMEM109	7.08037411308549e-08	0.325009	0.085	0.068	0.00156717
LINC01375	7.12722750910988e-08	-0.400032	0.047	0.061	0.00157754
UHRF2	7.26535842096964e-08	0.110284	0.367	0.335	0.00160811
ATP6V0B	7.28208513939291e-08	0.212666	0.246	0.222	0.00161182
PITPNM1	7.2989119498874e-08	0.381155	0.064	0.05	0.00161554
AMOT	7.31088404458401e-08	0.29424	0.144	0.124	0.00161819
MCM7	7.33486753205238e-08	0.420953	0.053	0.04	0.0016235
BLNK	7.35591618679853e-08	-0.113971	0.772	0.773	0.00162816
RPS24	7.36466932328728e-08	-0.185061	0.371	0.395	0.0016301
YIPF4	7.55409391133647e-08	0.144291	0.339	0.311	0.00167202
GCNA	7.55561820725154e-08	0.282857	0.102	0.085	0.00167236
ITGA10	7.55850014946501e-08	0.468728	0.037	0.026	0.001673
UBASH3B	7.61316944333753e-08	-0.128486	0.466	0.489	0.0016851
MFSD1	7.67607913957895e-08	0.117713	0.495	0.468	0.00169902
KIAA2026	7.70346749315386e-08	0.108117	0.58	0.553	0.00170509
C1orf122	7.908900056454e-08	0.406451	0.064	0.05	0.00175056
LARP1B	7.93457176631418e-08	0.192722	0.244	0.219	0.00175624
SREK1	7.97571493193311e-08	0.146274	0.316	0.287	0.00176534
HOMER3	8.00255591825422e-08	0.284992	0.104	0.086	0.00177129
AMZ1	8.14618770308841e-08	-0.503169	0.061	0.076	0.00180308
TRIM14	8.14632228151588e-08	0.143964	0.324	0.297	0.00180311
TFCP2	8.18583132011261e-08	-0.133194	0.503	0.525	0.00181185
SLC4A2	8.23101501721804e-08	0.302862	0.078	0.062	0.00182185
PROCR	8.23280754936832e-08	-0.278934	0.115	0.135	0.00182225
SP4	8.27586985513474e-08	0.197893	0.192	0.168	0.00183178
SMC1A	8.34763892703064e-08	0.205562	0.193	0.17	0.00184767
SMARCE1	8.69756568636164e-08	0.201236	0.169	0.147	0.00192512
TCEAL1	8.72213998349956e-08	0.363494	0.07	0.055	0.00193056
OTUD1	8.87043325314379e-08	-0.407204	0.073	0.089	0.00196338
THOC6	8.8833764684321e-08	0.573395	0.029	0.02	0.00196625
HIF1A	8.89280523411725e-08	-0.221946	0.713	0.725	0.00196833
PITX1-AS1	9.01970899726587e-08	-0.342063	0.039	0.052	0.00199642
CCDC88B	9.10327733259426e-08	0.205771	0.22	0.196	0.00201492
HCCS-DT	9.10865881798443e-08	-0.263632	0.053	0.067	0.00201611
DELE1	9.14820723713581e-08	0.137545	0.344	0.315	0.00202486
XAF1	9.20299608913661e-08	-0.163511	0.334	0.361	0.00203699
AFDN	9.40408623567836e-08	0.128559	0.285	0.257	0.0020815
FRAT1	9.61042438130648e-08	0.476556	0.039	0.028	0.00212717
EHBP1	9.74123256255557e-08	0.128705	0.447	0.419	0.00215612
SLC12A6	9.90212932633402e-08	0.12617	0.398	0.37	0.00219174
CLSTN2	9.96918087905203e-08	0.177868	0.172	0.15	0.00220658
SLC25A53	1.00204931616194e-07	0.204658	0.168	0.146	0.00221794
SLC24A4	1.00633579655822e-07	0.32401	0.079	0.064	0.00222742
MEF2D	1.02359355054745e-07	-0.235023	0.212	0.235	0.00226562
CACNA1B	1.02928233573799e-07	0.149833	0.217	0.192	0.00227821
SLC2A1	1.04448696162905e-07	-0.586111	0.025	0.035	0.00231187
HSPE1	1.04628063184748e-07	-0.3926	0.132	0.151	0.00231584
SACS	1.05169001874951e-07	0.24732	0.158	0.137	0.00232781
PMPCB	1.05963545237599e-07	0.198571	0.18	0.157	0.0023454
COL14A1	1.07605775716113e-07	0.420469	0.046	0.034	0.00238175
LINC02296	1.09808953210862e-07	-0.497934	0.024	0.034	0.00243051
KCND3	1.10026234936999e-07	0.216035	0.121	0.101	0.00243532
TIA1	1.11221360125077e-07	0.175326	0.244	0.22	0.00246177
ZNF561	1.12315270679779e-07	0.221944	0.117	0.098	0.00248599
UNC13B	1.13179667894417e-07	0.198408	0.176	0.154	0.00250512
CACNA1D	1.14132987996613e-07	-0.163687	0.47	0.49	0.00252622
TAF4B	1.14523442860488e-07	0.31107	0.09	0.073	0.00253486
MEPCE	1.16749649266161e-07	0.469816	0.041	0.029	0.00258414
NAA30	1.16819146566549e-07	0.31091	0.106	0.088	0.00258567
CDH20	1.18856463949249e-07	0.140707	0.109	0.09	0.00263077
RHOBTB1	1.19190816748724e-07	0.1917	0.171	0.149	0.00263817
NR4A2	1.20567332741077e-07	-0.417676	0.064	0.079	0.00266864
MSANTD2	1.21189991321216e-07	0.156348	0.232	0.206	0.00268242
CST3	1.22673085017259e-07	0.190235	0.38	0.356	0.00271525
NPAS1	1.23037927917415e-07	0.597861	0.024	0.015	0.00272332
HEXD	1.23692903993379e-07	0.2127	0.168	0.146	0.00273782
CASP8	1.2607752396897e-07	0.153705	0.228	0.203	0.0027906
MYOM1	1.26200280349554e-07	0.307525	0.093	0.076	0.00279332
GDE1	1.27314192727342e-07	0.27622	0.089	0.073	0.00281797
ADCY9	1.29572145324397e-07	0.177033	0.222	0.197	0.00286795
HIBCH	1.29783707196378e-07	-0.218389	0.394	0.414	0.00287263
ARSK	1.32538426740416e-07	0.393547	0.06	0.046	0.00293361
RPL18A	1.33507447189156e-07	0.192928	0.254	0.23	0.00295505
SCAP	1.34401478862904e-07	0.19553	0.203	0.18	0.00297484
FAM214A	1.34425945248744e-07	0.172707	0.303	0.277	0.00297538
TRMT1	1.37050348353481e-07	0.182964	0.206	0.182	0.00303347
POC1B-AS1	1.3719458389278e-07	0.259044	0.118	0.099	0.00303666
SCO2	1.3735244652282e-07	-0.300216	0.076	0.092	0.00304016
GIMAP4	1.39284634339953e-07	0.192589	0.195	0.172	0.00308293
LINC01907	1.41200858629855e-07	0.368614	0.062	0.049	0.00312534
PPP2R5B	1.45576120096311e-07	0.327419	0.074	0.059	0.00322218
MCRIP1	1.47806058142129e-07	0.294249	0.096	0.079	0.00327154
ABCG2	1.48489050357528e-07	-0.455867	0.031	0.042	0.00328666
CCDC30	1.49261972442782e-07	0.18941	0.21	0.186	0.00330376
HLA-DPA1	1.54524262413199e-07	0.15246	0.35	0.324	0.00342024
GABARAPL1	1.5649613417126e-07	-0.253748	0.111	0.13	0.00346389
NOL8	1.57299059638234e-07	0.177575	0.211	0.187	0.00348166
EFNA5	1.57381838873189e-07	0.146771	0.215	0.191	0.00348349
MFSD4B	1.58085511430332e-07	0.139341	0.387	0.358	0.00349906
GPR155	1.60362915574934e-07	0.174558	0.365	0.338	0.00354947
FAM107A	1.6538701812665e-07	0.369235	0.045	0.033	0.00366068
SLC20A2	1.66630275846611e-07	0.137211	0.374	0.346	0.00368819
MAP3K6	1.6759320483921e-07	0.548931	0.032	0.023	0.00370951
SRPK1	1.68461076000527e-07	0.185578	0.199	0.176	0.00372872
ZMYND10	1.68512900458539e-07	1.02612	0.012	0.006	0.00372986
SAFB2	1.69619865859369e-07	0.145505	0.279	0.252	0.00375437
ETAA1	1.7287013075064e-07	0.293062	0.079	0.063	0.00382631
COASY	1.73420311868009e-07	0.387491	0.06	0.046	0.00383849
NRSN2-AS1	1.74318732168096e-07	0.3745	0.047	0.035	0.00385837
PLIN2	1.77492703439559e-07	-0.159087	0.095	0.077	0.00392862
LRRC37B	1.79036353072304e-07	0.195378	0.203	0.18	0.00396279
ESRRA	1.80260870260898e-07	0.186581	0.188	0.165	0.00398989
MAST1	1.80511349945714e-07	0.282613	0.097	0.08	0.00399544
PRR14	1.80897927728893e-07	0.404582	0.055	0.042	0.00400399
HLA-DQA2	1.81015293781258e-07	-0.67158	0.014	0.022	0.00400659
FAM229A	1.82200021378603e-07	0.51136	0.032	0.023	0.00403282
PSD	1.83159065938529e-07	0.344636	0.063	0.049	0.00405404
KLHL29	1.83543384903982e-07	0.336059	0.072	0.058	0.00406255
HCRTR2	1.85461535131623e-07	0.792631	0.014	0.008	0.00410501
CCL4	1.86334239019631e-07	-0.336313	0.007	0.013	0.00412432
CITED2	1.8705712177465e-07	-0.406754	0.027	0.037	0.00414032
MACC1	1.88559955846959e-07	0.483468	0.03	0.02	0.00417359
ZYG11B	1.89291508160312e-07	0.116298	0.338	0.309	0.00418978
ADAMTSL2	1.93289402782197e-07	0.15891	0.243	0.218	0.00427827
NHS	1.95361065152646e-07	0.457036	0.064	0.05	0.00432412
TUBGCP5	1.95365442352057e-07	0.186943	0.176	0.154	0.00432422
YLPM1	1.99388078106492e-07	0.108367	0.413	0.382	0.00441326
EDIL3	2.01396487386494e-07	0.158396	0.177	0.155	0.00445771
SLC25A43	2.01452004264139e-07	0.270182	0.123	0.104	0.00445894
CACNG2	2.03480022686372e-07	0.323501	0.064	0.05	0.00450383
TSPAN15	2.04752769041102e-07	0.190502	0.21	0.187	0.004532
SEMA6D	2.04762625165444e-07	0.191487	0.183	0.161	0.00453222
MYLPF	2.04907681116132e-07	0.605855	0.026	0.017	0.00453543
INKA1	2.09553712790169e-07	0.347913	0.059	0.045	0.00463826
GEMIN7	2.10121186522312e-07	0.430261	0.046	0.034	0.00465082
LINC00578	2.10502943225013e-07	0.201067	0.275	0.25	0.00465927
MBD4	2.13684218222863e-07	0.173703	0.259	0.234	0.00472969
PYCARD	2.14497800443945e-07	0.315996	0.091	0.074	0.00474769
RPSA	2.14644850621383e-07	0.162842	0.294	0.269	0.00475095
LINC02422	2.18131156333965e-07	0.39008	0.065	0.051	0.00482812
DCAF17	2.20804911057466e-07	0.191033	0.174	0.153	0.0048873
CMAS	2.21187790803779e-07	0.281354	0.11	0.093	0.00489577
RBBP9	2.23970888682039e-07	0.523856	0.032	0.023	0.00495737
C3orf38	2.24022383879141e-07	0.195733	0.164	0.143	0.00495851
KAT2A	2.25818600452031e-07	0.188959	0.179	0.156	0.00499827
ULK1	2.26204558578266e-07	0.231174	0.139	0.119	0.00500681
LATS2	2.27632241797751e-07	0.24335	0.113	0.095	0.00503841
PATL2	2.28162619757285e-07	0.295696	0.101	0.084	0.00505015
CLHC1	2.28529601976327e-07	0.246501	0.134	0.115	0.00505827
PCBP2	2.28573017445761e-07	0.11756	0.43	0.403	0.00505924
P3H2	2.36195598431581e-07	-0.157043	0.337	0.361	0.00522795
MYLIP	2.37431381410856e-07	0.261848	0.114	0.096	0.00525531
ZC3HAV1	2.46030563752739e-07	-0.181339	0.446	0.465	0.00544564
OPN3	2.47698454733776e-07	0.29395	0.079	0.064	0.00548256
PCAT1	2.53027327684782e-07	0.457152	0.045	0.033	0.00560051
HDHD3	2.53976541867388e-07	0.295448	0.081	0.065	0.00562152
LARP7	2.55341986437001e-07	0.169198	0.226	0.203	0.00565174
CAMK2A	2.58215213361161e-07	0.197392	0.142	0.122	0.00571534
NPDC1	2.62777165063041e-07	0.287801	0.093	0.077	0.00581631
GPR137	2.62870724261071e-07	0.304768	0.072	0.058	0.00581838
MORC2-AS1	2.63456646737494e-07	0.813123	0.016	0.009	0.00583135
CZIB	2.65050095127398e-07	0.311732	0.078	0.062	0.00586662
RPP30	2.65421390434138e-07	0.254968	0.112	0.094	0.00587484
LCP2	2.74908573402614e-07	0.102299	0.526	0.499	0.00608483
SPI1	2.75086635784138e-07	0.104343	0.436	0.409	0.00608877
SHANK2	2.75728959550101e-07	0.233828	0.114	0.096	0.00610298
KHDRBS2	2.7901925279891e-07	0.121093	0.392	0.363	0.00617581
SLC25A6	2.82134547910499e-07	0.263759	0.152	0.133	0.00624477
STXBP5-AS1	2.8371189560072e-07	0.264744	0.131	0.112	0.00627968
WAS	2.8486755930553e-07	0.200033	0.18	0.158	0.00630526
GFAP	2.87360470629488e-07	0.475019	0.066	0.052	0.00636044
BBS9	2.88365941062028e-07	0.109342	0.525	0.497	0.00638269
CT69	2.89051932032743e-07	0.336153	0.069	0.055	0.00639788
CRIM1	2.95797427196881e-07	0.222033	0.12	0.102	0.00654718
EPC2	3.01125075171583e-07	0.103361	0.517	0.489	0.0066651
TMPO	3.04478324767731e-07	0.13163	0.276	0.25	0.00673932
SLC38A6	3.04604139968842e-07	0.325326	0.148	0.129	0.00674211
EMP3	3.05763965397782e-07	0.412276	0.052	0.04	0.00676778
LONRF3	3.0639354500044e-07	0.323797	0.039	0.028	0.00678171
ZBED3-AS1	3.1095422981637e-07	0.294782	0.075	0.06	0.00688266
IFI44	3.1221222803653e-07	0.185461	0.225	0.201	0.00691051
RAB1B	3.15059584879952e-07	0.346091	0.069	0.055	0.00697353
MADD	3.15647177763546e-07	0.161044	0.232	0.208	0.00698653
RFLNB	3.23645864584255e-07	0.697205	0.017	0.01	0.00716358
TRIQK	3.24168174715992e-07	0.206689	0.156	0.136	0.00717514
LINC01089	3.2565884589969e-07	0.277919	0.111	0.094	0.00720813
FAM102B	3.29354067539463e-07	-0.133118	0.438	0.46	0.00728992
SMCR8	3.31251537475802e-07	0.247477	0.095	0.078	0.00733192
ABCC6	3.41017410500543e-07	0.491536	0.036	0.026	0.00754808
REEP4	3.41683681838567e-07	0.314895	0.088	0.072	0.00756283
RAB3IP	3.43776842072758e-07	0.305971	0.075	0.06	0.00760916
ATPSCKMT	3.45198548009301e-07	-0.238624	0.12	0.139	0.00764062
NIPBL-DT	3.46406177078561e-07	0.258061	0.108	0.091	0.00766735
ZNF200	3.48854561808522e-07	0.430632	0.049	0.037	0.00772155
LMO3	3.51153072887498e-07	0.243257	0.106	0.089	0.00777242
NAV1	3.60536373149674e-07	0.135811	0.247	0.222	0.00798011
RAB27A	3.60904836876634e-07	0.163021	0.244	0.221	0.00798827
DNA2	3.68684292467136e-07	0.314407	0.071	0.057	0.00816046
TBRG4	3.72493247198577e-07	0.356518	0.065	0.051	0.00824477
FAM32A	3.72687827593179e-07	0.412708	0.051	0.039	0.00824907
NFIL3	3.73177940871607e-07	0.312765	0.098	0.081	0.00825992
PTBP1	3.74734862255759e-07	0.211529	0.176	0.155	0.00829438
CLECL1	3.78717595748739e-07	-0.251494	0.142	0.162	0.00838254
BCL9L	3.93395718921609e-07	0.270382	0.092	0.076	0.00870742
CADPS	3.94406879354617e-07	0.125798	0.255	0.229	0.0087298
TLE5	3.95735495087601e-07	0.217672	0.163	0.143	0.00875921
PGGT1B	3.96055728208475e-07	0.13911	0.31	0.283	0.0087663
MTPN	3.97832207808144e-07	0.126803	0.287	0.261	0.00880562
JPH4	4.12099266974035e-07	0.324004	0.068	0.054	0.00912141
RBM48	4.15167460799359e-07	0.260242	0.114	0.096	0.00918932
SRSF5	4.15210882819094e-07	0.107923	0.42	0.391	0.00919028
MAP3K8	4.20764463726963e-07	-0.300855	0.421	0.432	0.0093132
LENG8	4.24821961534355e-07	0.142341	0.365	0.339	0.00940301
BAG6	4.26110593431175e-07	0.256453	0.105	0.087	0.00943153
BEX1	4.26900736803962e-07	-0.414119	0.041	0.053	0.00944902
ADRA2C	4.31574258273182e-07	0.881168	0.012	0.007	0.00955246
CCDC126	4.31761370688613e-07	0.242975	0.138	0.119	0.00955661
MCM9	4.32969510275721e-07	0.121692	0.332	0.304	0.00958335
MAP1LC3B2	4.35128984044934e-07	-0.640194	0.016	0.023	0.00963114
TENT4B	4.38361431895141e-07	-0.144413	0.303	0.328	0.00970269
SORCS2	4.4295002375213e-07	0.314181	0.081	0.066	0.00980426
RASGEF1C	4.45034129274745e-07	-0.24704	0.482	0.491	0.00985039
COPA	4.45092070473277e-07	-0.124595	0.429	0.452	0.00985167
DIP2A	4.47572681487094e-07	-0.136747	0.57	0.581	0.00990657
ZNF367	4.5387652435158e-07	0.517933	0.03	0.021	0.0100461
ACSF2	4.5680101115882e-07	0.197636	0.17	0.149	0.0101108
CDC14A	4.62192940911329e-07	0.113492	0.358	0.33	0.0102302
RELL1	4.63317401820238e-07	0.17771	0.214	0.191	0.0102551
HDHD2	4.65579959299294e-07	0.176612	0.212	0.189	0.0103051
CALCOCO1	4.67688229098719e-07	0.227567	0.134	0.115	0.0103518
NRN1	4.81885394815547e-07	-0.62957	0.016	0.023	0.0106661
DYNC1LI2	4.86322492010956e-07	0.143408	0.263	0.237	0.0107643
MXI1	4.88597494534884e-07	0.177878	0.15	0.129	0.0108146
ADORA1	4.95431184680583e-07	0.414228	0.055	0.042	0.0109659
NIFK-AS1	4.96094122330003e-07	0.190774	0.141	0.121	0.0109805
SLC25A40	5.03636761596864e-07	0.212391	0.159	0.139	0.0111475
CD37	5.04953467695688e-07	0.193104	0.226	0.203	0.0111766
ESRRG	5.08353006046905e-07	0.259159	0.132	0.113	0.0112519
GHDC	5.18152007512469e-07	0.365699	0.052	0.04	0.0114688
TNFSF8	5.18203690713412e-07	0.206008	0.131	0.112	0.0114699
STK38	5.28557968242178e-07	0.138028	0.305	0.279	0.0116991
UHMK1	5.37168482319204e-07	0.16813	0.232	0.209	0.0118897
TAGLN2	5.45809805302212e-07	0.570329	0.028	0.02	0.012081
GSE1	5.46199829598302e-07	0.11731	0.321	0.294	0.0120896
GJA1	5.48170732034227e-07	0.511071	0.029	0.02	0.0121332
MAGI2-AS3	5.55081562069176e-07	-0.433802	0.039	0.05	0.0122862
HGS	5.5547939783453e-07	0.217536	0.141	0.122	0.012295
ZNF160	5.574837029592e-07	-0.173962	0.218	0.241	0.0123393
CISD3	5.64174184824653e-07	0.364303	0.056	0.044	0.0124874
JOSD2	5.72478956000727e-07	0.547088	0.033	0.023	0.0126712
C11orf65	5.77551195173293e-07	-0.272776	0.142	0.162	0.0127835
NEK8	5.79086814968856e-07	0.88633	0.013	0.007	0.0128175
TBC1D13	5.81708244918855e-07	0.24533	0.111	0.094	0.0128755
ABCA3	5.82014754701119e-07	0.240741	0.107	0.09	0.0128823
BZW2	5.82400113951688e-07	0.265406	0.127	0.109	0.0128908
AKNAD1	5.82881485403466e-07	0.324678	0.076	0.062	0.0129015
MICAL1	5.85259840332059e-07	0.179338	0.232	0.209	0.0129541
RAB39A	5.8628552058137e-07	-0.202977	0.257	0.28	0.0129768
QPCT	5.88732489103505e-07	0.851595	0.014	0.008	0.013031
TRIP10	5.89041052070161e-07	0.385407	0.042	0.031	0.0130378
RPL7A	5.94546917421183e-07	0.199589	0.326	0.304	0.0131597
ZNF521	5.94646204693843e-07	0.425973	0.034	0.024	0.0131619
RBM5	5.99759013891176e-07	0.107126	0.423	0.396	0.0132751
KCNJ5	6.00792255941466e-07	0.198723	0.169	0.148	0.0132979
SLAMF8	6.01884999169097e-07	0.350144	0.066	0.053	0.0133221
NEK6	6.07621648921787e-07	-0.121677	0.353	0.378	0.0134491
TMEM205	6.15620922339159e-07	0.390656	0.067	0.054	0.0136262
UBE2W	6.26874008083944e-07	-0.112741	0.695	0.703	0.0138752
UBE2Q1	6.32791002627664e-07	0.353118	0.069	0.055	0.0140062
SNHG5	6.35818734340308e-07	0.164981	0.232	0.209	0.0140732
PTPN12	6.45017238475717e-07	0.106444	0.506	0.48	0.0142768
APOLD1	6.49960100318342e-07	0.382253	0.071	0.057	0.0143862
ROBO4	6.51934180285012e-07	0.671715	0.017	0.01	0.0144299
CHST12	6.57015764868821e-07	0.328561	0.083	0.068	0.0145424
BUB3	6.64846312188926e-07	0.211009	0.122	0.104	0.0147157
FGGY	6.67671271501701e-07	0.173596	0.311	0.289	0.0147782
IGSF8	6.67675159772719e-07	0.356771	0.074	0.06	0.0147783
ZNF581	6.67929365164231e-07	0.60126	0.02	0.012	0.0147839
CTBS	6.68885907233352e-07	0.164322	0.251	0.227	0.0148051
DCTN4	6.72863579119306e-07	-0.137956	0.395	0.417	0.0148932
AK7	6.87071911737764e-07	0.781632	0.016	0.01	0.0152076
LINC03007	6.94586475361559e-07	-0.203303	0.185	0.206	0.015374
FAT3	7.00377912507665e-07	0.200081	0.142	0.123	0.0155022
MAP3K21	7.02639551525086e-07	0.296206	0.08	0.065	0.0155522
LINC01091	7.04139395903292e-07	0.310519	0.271	0.249	0.0155854
CNBP	7.12894758324385e-07	0.12364	0.308	0.282	0.0157792
MCMBP	7.22908499639069e-07	0.147346	0.261	0.236	0.0160009
SLC35F5	7.24179905730497e-07	0.104551	0.377	0.349	0.016029
TPP1	7.31868906130971e-07	0.197684	0.205	0.184	0.0161992
RIPOR1	7.39554263517306e-07	0.170233	0.198	0.176	0.0163693
ADIPOR1	7.50266269240847e-07	0.212816	0.133	0.115	0.0166064
CACNA2D3	7.50586959127131e-07	0.108042	0.253	0.229	0.0166135
TP53INP1	7.52344831435726e-07	0.171613	0.173	0.152	0.0166524
MIDEAS	7.56903805317479e-07	0.1451	0.278	0.254	0.0167533
LIMS1	7.66000847906639e-07	-0.236517	0.743	0.745	0.0169547
KLHL7	7.68454429049796e-07	0.212118	0.168	0.147	0.017009
WASL	7.68527912591363e-07	0.12809	0.29	0.264	0.0170106
APMAP	7.68970989491176e-07	-0.133285	0.436	0.458	0.0170204
FAM13A-AS1	7.74889948420316e-07	0.159024	0.182	0.161	0.0171514
ARHGAP45	7.7714504185073e-07	0.136777	0.281	0.256	0.0172013
XKR4	7.80481097652148e-07	0.150316	0.163	0.142	0.0172752
LRRC69	7.86077379639675e-07	0.149195	0.247	0.223	0.017399
CBX5	7.87235453290426e-07	0.192943	0.214	0.192	0.0174247
SNHG10	7.87758167282605e-07	0.282121	0.067	0.053	0.0174362
ANK2-AS1	8.02907558660086e-07	-0.306341	0.053	0.067	0.0177716
LINC00685	8.10512055617176e-07	0.237105	0.101	0.085	0.0179399
ZFX	8.17797090842127e-07	0.103019	0.408	0.382	0.0181011
CDH26	8.33134229391648e-07	0.250583	0.111	0.094	0.0184406
NGB	8.33707107401011e-07	0.703231	0.019	0.012	0.0184533
ITGB5-AS1	8.39544042015574e-07	-0.429527	0.03	0.041	0.0185825
MIOS	8.44543113834454e-07	-0.154286	0.338	0.361	0.0186931
BAX	8.47139062372094e-07	0.190259	0.157	0.137	0.0187506
GPATCH2	8.55985904931105e-07	-0.137668	0.307	0.332	0.0189464
PSME1	8.59839590365287e-07	0.411868	0.056	0.044	0.0190317
CFDP1	8.60235362534267e-07	0.112659	0.356	0.329	0.0190404
VGLL4	8.61417507602385e-07	0.100909	0.476	0.449	0.0190666
MGMT	8.69954700543989e-07	-0.156617	0.338	0.361	0.0192556
RGS14	8.7688241525598e-07	0.560102	0.03	0.021	0.0194089
MTCL1	8.85677818416675e-07	0.259254	0.119	0.102	0.0196036
GOLGB1	8.93671436239813e-07	0.138763	0.445	0.42	0.0197805
DDX51	9.00512935196157e-07	0.320052	0.068	0.054	0.019932
VEZF1	9.10029004465508e-07	0.155294	0.196	0.174	0.0201426
MRC1	9.11671902727304e-07	-0.151458	0.286	0.31	0.0201789
WDR45B	9.20403310164544e-07	-0.259185	0.226	0.247	0.0203722
RSU1	9.23086654260501e-07	0.141359	0.309	0.284	0.0204316
FAAP20	9.23854683046344e-07	0.309767	0.079	0.064	0.0204486
CXCL13	9.27614816005244e-07	0.830542	0.021	0.013	0.0205318
TMOD3	9.49429091086624e-07	0.114789	0.383	0.357	0.0210147
TPT1-AS1	9.53334148153063e-07	-0.157983	0.277	0.301	0.0211011
CFL1	9.58093981320973e-07	0.179334	0.227	0.205	0.0212065
ZDHHC18	9.59637734215879e-07	0.331129	0.059	0.046	0.0212406
ATP13A2	9.60222119031557e-07	0.222382	0.135	0.116	0.0212536
HTRA2	9.75168330225887e-07	0.433369	0.039	0.029	0.0215844
PDE11A	9.77758994620345e-07	0.69567	0.019	0.012	0.0216417
PLEKHA1	9.88125201473187e-07	0.117811	0.298	0.271	0.0218712
GRIN2A	9.9601611502466e-07	0.114265	0.259	0.234	0.0220458
CIR1	9.97255487484032e-07	0.176845	0.237	0.215	0.0220733
ST20	9.97475362280902e-07	0.167636	0.201	0.179	0.0220781
KCNH1	1.00571148701817e-06	0.133688	0.182	0.16	0.0222604
NDE1	1.01579038436587e-06	0.160594	0.199	0.177	0.0224835
NAPRT	1.01885530352057e-06	0.465348	0.041	0.031	0.0225513
NFRKB	1.0379018482419e-06	0.226928	0.13	0.112	0.0229729
CSGALNACT2	1.0705661417313e-06	0.186015	0.204	0.183	0.0236959
ARHGEF4	1.0750997915647e-06	0.256095	0.076	0.062	0.0237963
IDS	1.08246107672707e-06	0.100695	0.353	0.325	0.0239592
CBX3	1.09255961991407e-06	0.145124	0.21	0.188	0.0241827
COL5A3	1.09461260890712e-06	0.457427	0.035	0.025	0.0242282
CDKN1C	1.10009069416057e-06	0.404103	0.035	0.026	0.0243494
SSBP4	1.11054697318461e-06	0.206628	0.186	0.166	0.0245808
GANC	1.11349210651786e-06	0.118235	0.341	0.316	0.024646
PMP22	1.11963932653766e-06	0.620988	0.029	0.02	0.0247821
RTN2	1.1257955211764e-06	0.362039	0.053	0.042	0.0249184
MYO7A	1.13139115278649e-06	0.187775	0.172	0.152	0.0250422
ARPC5	1.1338542768397e-06	0.120332	0.29	0.264	0.0250967
FAM20C	1.13832974576119e-06	0.155905	0.249	0.225	0.0251958
TIRAP-AS1	1.14260845204103e-06	0.506885	0.032	0.023	0.0252905
SYNDIG1L	1.15022424246044e-06	0.975418	0.011	0.006	0.0254591
APRG1	1.15211585153941e-06	0.255595	0.098	0.082	0.0255009
DZIP1L	1.15248249104133e-06	0.231092	0.096	0.08	0.025509
ALG13	1.15393390642326e-06	0.101765	0.485	0.457	0.0255412
LINC00598	1.15611863071065e-06	0.338136	0.048	0.036	0.0255895
SCAMP1	1.16252830854162e-06	0.135183	0.277	0.253	0.0257314
DGKE	1.16359261008816e-06	0.200158	0.14	0.121	0.025755
RAB33B-AS1	1.171748544224e-06	0.134436	0.365	0.34	0.0259355
ZDHHC5	1.18803124463005e-06	0.177042	0.206	0.185	0.0262959
TMEM52B	1.19232271385435e-06	-0.391616	0.036	0.046	0.0263909
MAP3K2-DT	1.21142521754524e-06	0.589105	0.027	0.019	0.0268137
MAP2K2	1.21364082057183e-06	0.1805	0.162	0.142	0.0268627
TSPYL1	1.21863984802244e-06	0.196846	0.137	0.119	0.0269734
YTHDC2	1.23248014877561e-06	-0.113276	0.496	0.517	0.0272797
NINJ2-AS1	1.24077640831545e-06	0.332325	0.064	0.051	0.0274633
MIRLET7IHG	1.24193308488175e-06	0.273663	0.084	0.069	0.0274889
PARVG	1.24717118527917e-06	0.100426	0.475	0.448	0.0276049
HNRNPA1	1.2476051390791e-06	0.142543	0.259	0.235	0.0276145
CEP126	1.26386941393245e-06	0.357999	0.08	0.066	0.0279745
C1QTNF4	1.27686136732933e-06	0.505659	0.032	0.023	0.028262
WWC1	1.2792880432604e-06	0.462934	0.046	0.035	0.0283158
ZDHHC3	1.28972269787885e-06	0.144028	0.246	0.223	0.0285467
KLF3-AS1	1.29576012733216e-06	0.213039	0.15	0.131	0.0286804
SOCS4	1.30344735163181e-06	0.178964	0.145	0.126	0.0288505
TCN2	1.30369999320571e-06	0.69417	0.019	0.012	0.0288561
TP53I13	1.34028011879094e-06	0.237526	0.124	0.107	0.0296658
WDR13	1.34743350800296e-06	0.287976	0.077	0.063	0.0298241
RBAK	1.34940727357848e-06	0.226014	0.105	0.089	0.0298678
MAPK8IP1	1.37039864135685e-06	0.423534	0.039	0.029	0.0303324
MSANTD4	1.37251634094294e-06	0.293246	0.084	0.069	0.0303793
TMEM115	1.37545541980575e-06	0.490056	0.031	0.022	0.0304443
PIGQ	1.37653869669514e-06	0.332109	0.067	0.054	0.0304683
CLASP1-AS1	1.40444167320913e-06	0.368484	0.05	0.038	0.0310859
KLHL36	1.40798420091993e-06	0.172012	0.176	0.156	0.0311643
BTG1	1.42344608603742e-06	0.11897	0.235	0.211	0.0315066
SH2D4A	1.42544070417108e-06	0.217322	0.118	0.101	0.0315507
CSTF1	1.4396171189953e-06	0.32507	0.069	0.055	0.0318645
PTPN2	1.46815718060993e-06	-0.165839	0.639	0.645	0.0324962
PACRG	1.47500966358655e-06	0.308217	0.108	0.092	0.0326479
LUCAT1	1.48822668264411e-06	-0.704902	0.029	0.039	0.0329404
DOCK3	1.49315414048959e-06	0.109525	0.404	0.378	0.0330495
UNKL	1.49403898377293e-06	0.237561	0.126	0.108	0.0330691
S100A13	1.50383598771202e-06	0.491618	0.03	0.021	0.0332859
PHB2	1.5064927635922e-06	0.297922	0.074	0.061	0.0333447
TNFRSF1A	1.51629111943894e-06	0.10566	0.407	0.38	0.0335616
CDKN2B-AS1	1.52198137495477e-06	0.185625	0.19	0.169	0.0336875
NLRX1	1.52666981662297e-06	0.382793	0.054	0.042	0.0337913
CAP1	1.57185943887481e-06	0.11322	0.391	0.364	0.0347915
UNC13C	1.58917626442516e-06	0.244375	0.088	0.073	0.0351748
RGS18	1.59079785897644e-06	0.204029	0.195	0.175	0.0352107
SNX17	1.60120429802742e-06	0.319084	0.07	0.057	0.0354411
LINC02021	1.60773218616807e-06	0.3271	0.041	0.031	0.0355855
NFE2L3	1.63835734532769e-06	0.352216	0.051	0.039	0.0362634
PLEKHG5	1.68684792271595e-06	-0.266234	0.093	0.109	0.0373367
RC3H2	1.68833201795808e-06	0.113687	0.288	0.263	0.0373695
SMIM30	1.68866259307117e-06	0.407	0.044	0.034	0.0373769
CYP7B1	1.70374847461482e-06	0.457957	0.034	0.025	0.0377108
PKNOX2	1.71996758069198e-06	0.234145	0.09	0.075	0.0380698
PUDP	1.73000560850824e-06	0.113714	0.269	0.244	0.0382919
SPOUT1	1.7348236745366e-06	0.312717	0.063	0.051	0.0383986
NQO2	1.74237060305788e-06	0.171499	0.192	0.171	0.0385656
FAM219B	1.74582351399465e-06	0.178235	0.146	0.127	0.0386421
MFSD6	1.77023104308147e-06	0.240282	0.093	0.078	0.0391823
DVL1	1.77192345241883e-06	0.364504	0.05	0.038	0.0392198
RBPJ	1.77289436232291e-06	0.104152	0.654	0.627	0.0392412
RAC1	1.78120559156803e-06	-0.121146	0.56	0.576	0.0394252
ABHD11	1.78582290751624e-06	0.356148	0.06	0.048	0.0395274
MRPL3	1.79754004584283e-06	0.136787	0.271	0.247	0.0397868
CC2D1A	1.79959751730064e-06	0.239408	0.11	0.093	0.0398323
CPEB2	1.80126588308033e-06	0.129134	0.269	0.245	0.0398692
FMNL1-DT	1.80767632419503e-06	0.147781	0.219	0.196	0.0400111
NEB	1.81613490693689e-06	0.266877	0.146	0.128	0.0401983
RNF187	1.82995339665103e-06	0.342661	0.06	0.048	0.0405042
LAMTOR3	1.83582468264998e-06	0.260243	0.074	0.06	0.0406341
KLHL13	1.88248828642868e-06	0.651572	0.016	0.01	0.041667
ADAMTS9-AS2	1.88292939319373e-06	0.303035	0.066	0.053	0.0416768
NAA38	1.89858548604409e-06	0.30723	0.062	0.049	0.0420233
SLC35E2A	1.90919985808352e-06	0.215212	0.12	0.103	0.0422582
RPS17	1.91147278563444e-06	0.171551	0.215	0.193	0.0423085
LGMN	1.91964313798353e-06	-0.381042	0.205	0.224	0.0424894
DLEU7	1.92059752358239e-06	-0.401827	0.406	0.411	0.0425105
EPHB6	1.92661960403197e-06	0.315506	0.076	0.062	0.0426438
PTCD3	1.93940686594389e-06	0.13038	0.27	0.246	0.0429268
GSTP1	1.94049236253311e-06	0.278973	0.094	0.079	0.0429509
TSGA10	1.97992526919935e-06	0.188481	0.191	0.17	0.0438237
SUN2	2.01103185986586e-06	0.196991	0.16	0.14	0.0445122
TMEM120A	2.02557049931378e-06	0.41801	0.042	0.032	0.044834
MAP7D1	2.02646511097334e-06	0.198796	0.159	0.14	0.0448538
CCNDBP1	2.02783772795249e-06	0.222645	0.1	0.084	0.0448842
TMEM222	2.03584075097054e-06	0.247571	0.092	0.076	0.0450613
MED22	2.03661990318016e-06	0.302583	0.071	0.058	0.0450785
NUB1	2.049326940099e-06	0.174187	0.214	0.193	0.0453598
MX1	2.05052028632261e-06	0.104487	0.198	0.176	0.0453862
SUCNR1	2.05847808295964e-06	-0.557405	0.014	0.021	0.0455624
PLEKHJ1	2.12938954808642e-06	0.295228	0.066	0.053	0.0471319
PDIA2	2.1619897437693e-06	0.407742	0.041	0.031	0.0478535
SLC25A11	2.16315202466404e-06	0.311636	0.066	0.053	0.0478792
NEIL2	2.17787559791893e-06	0.267544	0.091	0.076	0.0482051
ERCC6	2.18628667509136e-06	0.101735	0.258	0.233	0.0483913
FAIM2	2.24310109806231e-06	0.279416	0.099	0.083	0.0496488
DYNC1LI1	2.24386883796408e-06	0.113259	0.267	0.243	0.0496658
PLPPR2	2.2495759625257e-06	0.334971	0.064	0.051	0.0497921
SAMD13	2.25734474959525e-06	0.466598	0.03	0.022	0.0499641
STK36	2.25971386018287e-06	0.368802	0.056	0.044	0.0500165
PTPRN	2.29675846422402e-06	0.303003	0.073	0.06	0.0508365
MYSM1	2.29693939041272e-06	0.131828	0.346	0.322	0.0508405
STING1	2.29731077945531e-06	0.230488	0.114	0.098	0.0508487
LINC00499	2.30719596771484e-06	0.135115	0.029	0.021	0.0510675
HEXB	2.3077620178782e-06	0.144154	0.223	0.2	0.05108
SULT1C2	2.3098565576201e-06	0.584849	0.022	0.015	0.0511264
PDK4	2.32423286452328e-06	-0.537061	0.295	0.259	0.0514446
PWWP2A	2.3347882700737e-06	0.14659	0.24	0.217	0.0516782
ROGDI	2.35817866011048e-06	0.372942	0.051	0.04	0.0521959
CPLX2	2.36550201344656e-06	0.280913	0.076	0.062	0.052358
PPOX	2.41339379620485e-06	0.364377	0.047	0.036	0.0534181
NCDN	2.41454693923601e-06	0.246852	0.099	0.084	0.0534436
CRY2	2.43378948107771e-06	0.236257	0.114	0.097	0.0538695
SNHG25	2.47320029161158e-06	0.173196	0.276	0.254	0.0547418
PHF10	2.48407393630523e-06	0.191531	0.156	0.137	0.0549825
ABLIM1	2.49896384030698e-06	0.113292	0.156	0.137	0.0553121
ATP2B2	2.504996406335e-06	0.171633	0.138	0.12	0.0554456
TMEM51-AS2	2.51082006528504e-06	-0.457439	0.023	0.031	0.0555745
ASTN2	2.51179137071855e-06	0.235701	0.216	0.194	0.055596
RAB14	2.51536798876735e-06	0.115366	0.318	0.294	0.0556752
IPO13	2.5589083045275e-06	0.396933	0.047	0.036	0.0566389
NAA10	2.56917288505839e-06	0.259063	0.105	0.089	0.0568661
KSR2	2.58982665306518e-06	0.176712	0.172	0.152	0.0573232
RPL36A	2.61738141538232e-06	-0.184447	0.239	0.261	0.0579331
NPY1R	2.65488525071733e-06	0.364942	0.061	0.049	0.0587632
RELB	2.66358875312397e-06	-0.272242	0.082	0.097	0.0589559
WNK2	2.68299454075723e-06	0.231876	0.08	0.066	0.0593854
MAPK8IP2	2.6913523271096e-06	0.35555	0.047	0.036	0.0595704
CYP1B1-AS1	2.73437356023414e-06	0.284591	0.066	0.053	0.0605226
EEF2K	2.74611865646005e-06	0.139173	0.234	0.211	0.0607826
PRKCH-AS1	2.77445564981135e-06	0.633098	0.019	0.012	0.0614098
C3AR1	2.77568743517688e-06	0.155556	0.268	0.245	0.0614371
ELK4	2.77586332489591e-06	0.131287	0.27	0.246	0.061441
PLA2G4C	2.80683060771788e-06	-0.346019	0.079	0.094	0.0621264
TAF5L	2.81144275906267e-06	0.25377	0.136	0.119	0.0622285
TFE3	2.81975571395009e-06	0.185004	0.122	0.105	0.0624125
NBAS	2.82147300226231e-06	-0.104716	0.571	0.59	0.0624505
UBXN2A	2.83280519044424e-06	0.185265	0.189	0.169	0.0627013
SULT1A3	2.8347786713556e-06	0.387567	0.041	0.031	0.062745
SRCIN1	2.83730733806554e-06	0.297008	0.076	0.062	0.062801
CASP2	2.83864579907726e-06	0.267987	0.093	0.078	0.0628306
DHDDS-AS1	2.84978310678744e-06	0.363456	0.046	0.035	0.0630771
INTS6	2.86154092589423e-06	0.118412	0.449	0.425	0.0633373
SCAF4	2.86550335008933e-06	0.12705	0.314	0.291	0.0634251
TOX	2.89092448867162e-06	0.349737	0.137	0.12	0.0639877
TBC1D22A-DT	2.89633106323577e-06	-0.148405	0.075	0.09	0.0641074
DSCAML1	2.90521079011436e-06	0.145152	0.107	0.09	0.0643039
IGKC	2.90737809724074e-06	0.790194	0.015	0.009	0.0643519
CHGA	2.91813750436347e-06	0.35022	0.055	0.044	0.0645901
PES1	2.91828660666876e-06	0.360433	0.058	0.046	0.0645934
DYNLL2	2.92099080647692e-06	0.223817	0.09	0.075	0.0646532
CCDC186	2.93135211385731e-06	0.205578	0.159	0.141	0.0648825
MCRIP2	2.95057806355276e-06	0.297199	0.065	0.052	0.0653081
STX17	2.98290379443381e-06	0.165704	0.226	0.205	0.0660236
MRFAP1L1	2.9855756481334e-06	0.300592	0.073	0.06	0.0660827
MED4	2.99004524153953e-06	0.15466	0.226	0.204	0.0661817
ANKRD46	2.99189598905351e-06	0.193856	0.13	0.113	0.0662226
PLD1	3.00044858515461e-06	-0.119684	0.428	0.451	0.0664119
PSMF1	3.00195499748738e-06	0.134176	0.291	0.267	0.0664453
CDYL2	3.02497210995385e-06	0.29885	0.079	0.065	0.0669547
XYLT1	3.03298545256555e-06	0.115928	0.317	0.292	0.0671321
LINC01588	3.03681847742208e-06	0.35105	0.075	0.061	0.0672169
SAMD9	3.04406480427219e-06	0.225104	0.126	0.109	0.0673773
SBF2-AS1	3.07838376592682e-06	0.196822	0.115	0.099	0.0681369
FAM120AOS	3.08091012178574e-06	0.176855	0.16	0.141	0.0681929
LINC02245	3.09342075575759e-06	0.127345	0.403	0.378	0.0684698
RHOG	3.11382373944542e-06	0.197156	0.155	0.136	0.0689214
GMDS-DT	3.11590132187296e-06	-0.1167	0.566	0.584	0.0689674
SATB1-AS1	3.12705898061577e-06	0.323814	0.071	0.058	0.0692143
ANKRD49	3.13414354739486e-06	0.222923	0.123	0.106	0.0693711
ZNF366	3.13606687440263e-06	0.713817	0.019	0.012	0.0694137
WDR75	3.13725157544664e-06	0.164184	0.192	0.172	0.0694399
DHX33	3.14048102190146e-06	0.269428	0.084	0.07	0.0695114
OSER1-DT	3.14473093254694e-06	0.400255	0.044	0.034	0.0696055
PCNX4	3.15923846603009e-06	0.129309	0.36	0.336	0.0699266
TMEM71	3.20001868685691e-06	0.254065	0.096	0.081	0.0708292
PITPNM2	3.21127606556154e-06	-0.18946	0.129	0.148	0.0710784
DEPTOR	3.22769380408236e-06	0.132657	0.42	0.396	0.0714418
DIS3	3.23067785537505e-06	0.177936	0.163	0.144	0.0715078
EHMT2	3.32220284685133e-06	0.225534	0.104	0.088	0.0735336
LAMTOR4	3.32420302014675e-06	0.205241	0.147	0.128	0.0735779
THAP11	3.33288455966153e-06	0.508335	0.028	0.019	0.0737701
DUSP22	3.43212724176986e-06	0.123718	0.311	0.286	0.0759667
FLRT2	3.4965158616884e-06	0.112843	0.203	0.181	0.0773919
CNTNAP1	3.51188038524562e-06	0.376228	0.049	0.038	0.077732
RNFT2	3.52795895136659e-06	0.270442	0.065	0.052	0.0780878
LINC02428	3.54601056612315e-06	0.875144	0.011	0.006	0.0784874
C17orf67	3.55976510778537e-06	0.137681	0.186	0.165	0.0787918
FNTA	3.59661301890258e-06	0.123616	0.261	0.238	0.0796074
MIR181A1HG	3.62065597171388e-06	0.109139	0.392	0.367	0.0801396
WWP1	3.62891263264506e-06	0.107688	0.385	0.358	0.0803224
ZNF621	3.63063333703207e-06	0.160309	0.19	0.169	0.0803604
ZNF318	3.63087944569136e-06	0.194366	0.136	0.118	0.0803659
SLC35F6	3.63587567735105e-06	0.313576	0.066	0.054	0.0804765
TUBA1C	3.66147985634927e-06	0.235251	0.114	0.098	0.0810432
NOSIP	3.68666647957185e-06	0.192248	0.135	0.118	0.0816007
LPL	3.7116106889288e-06	0.243384	0.06	0.048	0.0821528
GAP43	3.75744414688781e-06	-0.28738	0.074	0.088	0.0831673
S100PBP	3.79364766907016e-06	0.100306	0.34	0.314	0.0839686
USF2	3.89482808031319e-06	0.138115	0.307	0.284	0.0862081
NSUN5	3.89625166921562e-06	0.207209	0.12	0.103	0.0862396
MTRF1	3.93067126142382e-06	0.241092	0.105	0.09	0.0870015
UBE2M	3.9351394281154e-06	0.357249	0.055	0.043	0.0871004
ARSJ	3.97193704288645e-06	-0.540194	0.021	0.029	0.0879149
NEDD8	3.98819099295509e-06	0.187312	0.157	0.138	0.0882746
UFD1	4.00037267869968e-06	0.203285	0.121	0.105	0.0885442
ZNF493	4.00476423651988e-06	0.165809	0.205	0.185	0.0886415
TRMT2A	4.01046227959868e-06	0.375849	0.052	0.041	0.0887676
NTRK3	4.0374477338246e-06	0.127188	0.192	0.171	0.0893649
QTRT1	4.09508194225717e-06	0.287536	0.079	0.066	0.0906405
RUSC1	4.1249565553747e-06	0.346832	0.058	0.047	0.0913018
HSDL2	4.13366491418848e-06	0.163344	0.206	0.185	0.0914945
BRD8	4.18569294141607e-06	0.22123	0.113	0.097	0.0926461
DEK	4.1949720308584e-06	0.10875	0.359	0.333	0.0928515
RBBP6	4.20784325193431e-06	0.12697	0.308	0.285	0.0931364
PPFIBP2	4.20915386944545e-06	0.162192	0.203	0.183	0.0931654
LANCL1	4.22177229916513e-06	0.180601	0.134	0.116	0.0934447
MAPT	4.22991485509809e-06	0.152581	0.155	0.137	0.0936249
TNFAIP8L2	4.23298974799898e-06	0.374511	0.048	0.038	0.093693
RNASEH2C	4.24744161763152e-06	0.290267	0.074	0.061	0.0940129
SDR39U1	4.29520294761853e-06	0.307303	0.07	0.057	0.09507
ARL2	4.30786475478481e-06	0.297172	0.066	0.054	0.0953503
CELF5	4.32415130837465e-06	0.243159	0.089	0.074	0.0957108
SPTSSA	4.33618542387704e-06	0.421602	0.043	0.033	0.0959771
RABGGTA	4.34845903961761e-06	0.507022	0.03	0.022	0.0962488
CASP6	4.39132325729184e-06	0.313693	0.063	0.051	0.0971975
TPPP	4.3965989530769e-06	0.352744	0.055	0.044	0.0973143
PAIP1	4.41182615107329e-06	0.163114	0.156	0.137	0.0976514
LERFS	4.43856558230715e-06	0.512366	0.024	0.017	0.0982432
LINC00921	4.46150622695623e-06	0.378849	0.043	0.033	0.098751
MLKL	4.47142757092196e-06	0.20491	0.142	0.124	0.0989706
FAM110B	4.48382740091995e-06	0.118872	0.288	0.262	0.099245
CHD1-DT	4.51818610850128e-06	0.187776	0.171	0.152	0.100006
CYP46A1	4.60448380616292e-06	0.33878	0.054	0.043	0.101916
KCTD2	4.62668064610608e-06	0.317293	0.071	0.058	0.102407
MAP3K11	4.65908392067704e-06	0.211824	0.129	0.112	0.103124
PHYHIP	4.66722682372126e-06	0.28285	0.085	0.071	0.103304
SSNA1	4.69118009257468e-06	0.328288	0.068	0.055	0.103835
PRIM1	4.71207260634334e-06	0.214849	0.103	0.088	0.104297
DNAH6	4.71958165400581e-06	0.38965	0.069	0.056	0.104463
ERCC1	4.72381793228181e-06	0.143706	0.19	0.169	0.104557
UHRF1BP1	4.72697048904473e-06	0.104579	0.394	0.369	0.104627
ZNF257	4.76141056817862e-06	0.295185	0.058	0.046	0.105389
GRIK5	4.77270296338223e-06	0.253175	0.091	0.076	0.105639
PRR13	4.79699599062213e-06	0.180568	0.147	0.129	0.106177
TRAPPC5	4.81713566509947e-06	0.257118	0.079	0.066	0.106622
MIR4458HG	4.82028063074908e-06	0.506423	0.026	0.018	0.106692
DHRS4	4.83474187310054e-06	0.289063	0.071	0.059	0.107012
XRCC6	4.85560493033986e-06	0.138871	0.225	0.203	0.107474
TBC1D10C	4.89695384511195e-06	0.560835	0.024	0.017	0.108389
PPP1R16B	4.90700407129534e-06	0.250497	0.079	0.066	0.108612
PIK3IP1-DT	4.9263504851067e-06	0.236667	0.09	0.076	0.10904
TRPS1	4.93633095616895e-06	0.102542	0.63	0.608	0.109261
AMDHD2	4.95275036080528e-06	0.302325	0.081	0.068	0.109624
GRIA1	4.95492234554855e-06	0.130363	0.183	0.163	0.109672
PJVK	4.9787239653971e-06	0.423167	0.043	0.033	0.110199
LINGO2	4.98291390059763e-06	0.109327	0.277	0.253	0.110292
QRICH2	4.98745743445587e-06	0.341758	0.064	0.052	0.110392
CXXC1	5.047527305452e-06	0.325243	0.06	0.048	0.111722
SGPL1	5.05967833732117e-06	0.163499	0.223	0.202	0.111991
NT5DC1	5.08043346710718e-06	0.198102	0.178	0.159	0.11245
INPP5B	5.12778214902048e-06	-0.146879	0.3	0.321	0.113498
CDK10	5.14099492331259e-06	0.204375	0.132	0.115	0.113791
ANKRD13D	5.14575963578501e-06	0.134168	0.302	0.279	0.113896
SCAMP3	5.15615301959517e-06	0.195657	0.108	0.092	0.114126
NINJ2	5.17149499806775e-06	0.194981	0.113	0.097	0.114466
UBE2Z	5.24123964981959e-06	0.143622	0.231	0.21	0.11601
MXD4	5.25937210677525e-06	0.120433	0.334	0.311	0.116411
KLHL9	5.26430411336464e-06	0.15805	0.154	0.135	0.11652
ZNF785	5.32154427644115e-06	0.159089	0.164	0.145	0.117787
HIVEP2	5.33296258148956e-06	-0.134901	0.235	0.257	0.11804
CDC42BPA	5.36535321726053e-06	0.163169	0.228	0.207	0.118757
KYNU	5.43344124585941e-06	-0.133238	0.437	0.459	0.120264
CRELD2	5.44830821417476e-06	-0.314552	0.053	0.065	0.120593
LINC02391	5.45666561915233e-06	0.159593	0.313	0.291	0.120778
CPT1C	5.48234712653556e-06	0.392831	0.038	0.029	0.121346
UBTD2	5.5541552930327e-06	0.175419	0.177	0.158	0.122936
STARD13-AS	5.59452980076166e-06	0.223282	0.095	0.08	0.123829
TPM1	5.61866926903808e-06	-0.192738	0.153	0.171	0.124364
TIGD4	5.6715146659254e-06	-0.306459	0.053	0.064	0.125533
UROD	5.73856553177764e-06	0.434015	0.042	0.032	0.127017
PCMTD2	5.80824180694474e-06	0.131066	0.229	0.207	0.12856
TMEM266	5.81367722618874e-06	0.252523	0.068	0.056	0.12868
GGCT	5.93270029815408e-06	0.214803	0.09	0.076	0.131314
PRR5L	5.95842912734328e-06	0.343511	0.044	0.034	0.131884
SMARCD3	5.98609297099878e-06	0.16429	0.132	0.115	0.132496
PARD3	6.01302591102097e-06	0.165235	0.091	0.077	0.133092
NFIB	6.10296782273371e-06	0.167419	0.128	0.11	0.135083
TSTD3	6.10866909954958e-06	0.18484	0.188	0.169	0.135209
GALNT15	6.21407832763571e-06	0.48399	0.022	0.015	0.137542
TENM1	6.2546264085951e-06	0.302145	0.051	0.04	0.13844
METRNL	6.27493728843396e-06	-0.38709	0.036	0.045	0.138889
SELENOS	6.31756853928785e-06	0.194749	0.131	0.114	0.139833
MCM3	6.43740265244145e-06	0.251734	0.073	0.06	0.142485
ORMDL1	6.47499684336943e-06	0.141855	0.273	0.252	0.143318
SAP130	6.47801510703632e-06	0.155446	0.199	0.179	0.143384
KHNYN	6.71934407770623e-06	0.221201	0.096	0.082	0.148726
NIPAL3	6.77068870926268e-06	0.177688	0.17	0.151	0.149862
RBM22	6.79689433292357e-06	0.247899	0.098	0.083	0.150442
LINC02015	6.79961970613631e-06	1.03425	0.012	0.007	0.150503
LINC02591	6.86456671990969e-06	0.3204	0.063	0.051	0.15194
LINC02641	6.86747217360123e-06	0.425633	0.038	0.029	0.152005
FAM117B	6.89805667044793e-06	0.133398	0.239	0.216	0.152682
N4BP2L2-IT2	6.90012626359871e-06	0.283013	0.069	0.057	0.152727
STX17-DT	6.93642960541264e-06	-0.752912	0.019	0.026	0.153531
GCDH	6.94389067659333e-06	0.209686	0.122	0.105	0.153696
MAP1S	6.9441600750279e-06	0.16119	0.168	0.149	0.153702
RRP7A	6.99134474270959e-06	0.202498	0.117	0.101	0.154746
CLDND1	7.01643018548958e-06	0.15483	0.162	0.143	0.155302
RBM4	7.0396170426368e-06	0.130052	0.316	0.293	0.155815
CLCC1	7.08728556327153e-06	0.271411	0.083	0.07	0.15687
DNAJA1	7.10589908663161e-06	-0.231953	0.224	0.243	0.157282
UBR5-DT	7.12839726984073e-06	0.136334	0.208	0.187	0.15778
LRFN1	7.14167934395217e-06	0.532886	0.025	0.018	0.158074
DPF1	7.16420054716487e-06	0.452623	0.031	0.022	0.158572
MGAT4C	7.16853842730995e-06	0.135671	0.165	0.145	0.158668
EMC10	7.17166287855226e-06	0.257484	0.112	0.097	0.158738
RGS4	7.1798086077098e-06	-0.489911	0.022	0.03	0.158918
SYNE1	7.32818447105844e-06	0.127286	0.364	0.339	0.162202
SIRT5	7.38939238925076e-06	0.296957	0.079	0.066	0.163557
WDPCP	7.4802665468831e-06	-0.106842	0.414	0.437	0.165568
SLC30A1	7.49376768995885e-06	0.241262	0.102	0.087	0.165867
DNASE2	7.50759534956025e-06	0.308764	0.079	0.066	0.166173
ST8SIA1	7.51100641056497e-06	0.26856	0.07	0.058	0.166249
VPS13B-DT	7.57616105295109e-06	0.181135	0.178	0.16	0.167691
PPM1A	7.67406939216732e-06	0.135688	0.257	0.236	0.169858
PANX1	7.73229920764272e-06	-0.352759	0.09	0.105	0.171147
ATP1A3	7.90478590532222e-06	0.282176	0.077	0.064	0.174965
TNFSF13	7.93356481163954e-06	0.178103	0.129	0.112	0.175602
H3-3A-DT	8.04763948516377e-06	0.335675	0.059	0.048	0.178126
LYZ	8.06714146769959e-06	0.533104	0.03	0.022	0.178558
PDE1B	8.09629827656561e-06	0.188818	0.126	0.11	0.179203
RPL12	8.17913421477619e-06	-0.215179	0.211	0.23	0.181037
SLC26A7	8.20514018193005e-06	0.530814	0.039	0.03	0.181613
NBPF1	8.23938169541462e-06	0.145174	0.213	0.192	0.18237
CATSPER2	8.283361415165e-06	-0.137185	0.254	0.275	0.183344
TCF7L2	8.34102094724638e-06	-0.120901	0.405	0.426	0.18462
NAT8L	8.34684235693624e-06	0.317779	0.048	0.038	0.184749
ZYX	8.36017340345333e-06	0.239723	0.137	0.12	0.185044
ADAMTSL4	8.38725881926537e-06	-0.341467	0.038	0.048	0.185644
FBXL19	8.53933783467063e-06	0.239216	0.083	0.07	0.18901
KCNJ6	8.54527010165516e-06	0.209411	0.086	0.072	0.189141
CLDN9	8.57836888367024e-06	0.809018	0.011	0.006	0.189874
B4GAT1	8.57839806461255e-06	0.401472	0.044	0.034	0.189874
OVCH1-AS1	8.58729354559351e-06	0.468888	0.042	0.033	0.190071
ATG16L1	8.59921445835369e-06	0.175774	0.151	0.133	0.190335
PPP1R9B	8.60688533692987e-06	0.264089	0.088	0.074	0.190505
REPS2	8.66413954016481e-06	0.158944	0.214	0.194	0.191772
SVIP	8.67616369814498e-06	0.306831	0.063	0.051	0.192038
PGK1	8.68791292841252e-06	-0.230789	0.339	0.355	0.192298
ESCO1	8.81061903386229e-06	0.124575	0.247	0.225	0.195014
DHX8	8.81656057703092e-06	0.15631	0.168	0.149	0.195146
DYNLT5	8.86491112340933e-06	0.565216	0.025	0.018	0.196216
PAX8	8.87300446595423e-06	0.420144	0.032	0.024	0.196395
ZNF891	8.8967017059247e-06	0.183163	0.121	0.104	0.19692
MTFR1	8.93414390610714e-06	0.150377	0.25	0.228	0.197748
PDHA1	8.93825940367732e-06	0.252731	0.092	0.078	0.197839
MRPS26	9.00453621060951e-06	0.319084	0.069	0.056	0.199306
PRLR	9.00494194141811e-06	0.604491	0.017	0.011	0.199315
CUL4B	9.05116045382902e-06	0.204452	0.126	0.109	0.200338
FAM217B	9.05934643833028e-06	0.207266	0.118	0.103	0.20052
MAGI3	9.08218795548484e-06	0.116042	0.329	0.305	0.201025
USP38	9.08634912273487e-06	0.212202	0.127	0.11	0.201117
CYB5D2	9.09205201711603e-06	0.232674	0.092	0.078	0.201243
BAZ2A	9.11510776122257e-06	0.118558	0.269	0.246	0.201754
ARMH1	9.14133282281069e-06	0.27104	0.084	0.07	0.202334
MAP1A	9.17160068662023e-06	0.25877	0.08	0.067	0.203004
FAM50A	9.21995336965438e-06	0.282069	0.079	0.066	0.204074
ZNNT1	9.24698399438057e-06	0.326481	0.056	0.045	0.204673
[truncated: 3,786 more rows]

## Sheet: Micro_mid_vs_low
DEGs (log2FC>0.25 and p value<0.05) found in human microglial cells between individuals during early stages of AD progression (mid vs low Braak stages)
	p_val	avg_log2FC	pct.1	pct.2	p_val_adj
TMEM163	1.02743187124286e-227	-1.06145	0.487	0.744	2.27411770380895e-223
C3	1.06325883597759e-129	-0.562754	0.84	0.928	2.35341710755279e-125
HAMP	3.39895710110047e-115	-0.923739	0.223	0.413	7.52325164757577e-111
FGL1	1.38748114059038e-114	-2.34616	0.042	0.148	3.07105075658275e-110
CHST11	1.13301816025209e-108	-0.313474	0.995	1	2.50782239590198e-104
DENND3	2.67803141920415e-107	-0.398218	0.927	0.972	5.92755474326647e-103
NAV3	1.08760665723486e-103	-0.383655	0.936	0.975	2.40730857512364e-99
PRKCA	3.46836324091075e-94	-0.567536	0.827	0.898	7.67687519743186e-90
KBTBD12	9.05941916096937e-94	-0.780088	0.313	0.493	2.00521183708896e-89
SH3RF3	7.3421491457632e-93	-0.361331	0.95	0.977	1.62511129192323e-88
IPCEF1	4.25508266561545e-91	-0.51572	0.863	0.933	9.41819997207325e-87
DOCK4	1.00261331937931e-89	0.345374	1	1	2.21918432111418e-85
BIN1	2.99176184573598e-87	-0.671867	0.585	0.724	6.62196566935202e-83
DOCK5	2.52750041594661e-85	0.733448	0.606	0.438	5.59436942065622e-81
DCAF6	3.50224480688878e-85	-0.577799	0.673	0.793	7.75186865556763e-81
HSPA1B	3.55897704666239e-84	1.48014	0.287	0.127	7.87743979508253e-80
SLC2A5	7.56014793732359e-84	-0.538503	0.657	0.787	1.6733631444472e-79
HSPA1A	1.07308535541531e-83	1.29184	0.388	0.215	2.37516712567624e-79
SETBP1	7.97346258370067e-82	-0.688941	0.502	0.646	1.76484620827631e-77
BACH1	3.08319351795172e-80	-0.486027	0.84	0.9	6.82434053263435e-76
SPTLC2	1.4788435510341e-78	-0.441825	0.82	0.894	3.27327231585887e-74
SPATA6	8.3339395681303e-76	-0.516398	0.596	0.737	1.84463418400996e-71
LINC00355	2.21931978539684e-74	-2.21393	0.016	0.074	4.91224241299738e-70
FOXP1	1.73623346620697e-73	0.507222	0.826	0.715	3.8429791541025e-69
PHC2	4.55772586393988e-72	-0.418879	0.727	0.842	1.00880704272445e-67
LINC02742	9.50440097194819e-71	-0.774134	0.129	0.255	2.10370411113101e-66
PLAC8	1.47767355363541e-69	-1.29052	0.125	0.241	3.27068264361661e-65
NIBAN1	2.13395237536208e-68	-0.617622	0.411	0.568	4.72329018762643e-64
ZFY	5.41014802419312e-68	-1.10071	0.1	0.209	1.19748216367491e-63
MARCHF1	6.24314338823388e-68	-0.344729	0.892	0.94	1.38185735755169e-63
MBNL2	2.76932586396067e-67	0.643569	0.658	0.541	6.12962586729055e-63
TGFBR1	2.73516118082083e-65	-0.46293	0.818	0.884	6.05400575762882e-61
NLGN4Y	9.30889431108655e-64	-0.864855	0.169	0.295	2.0604306668159e-59
SPATS2L	2.33218495008594e-63	0.940876	0.39	0.244	5.16205816852022e-59
HSPB1	2.49502054086536e-62	2.04531	0.2	0.083	5.52247846515139e-58
PRKD3	3.54956315146223e-62	-0.538585	0.482	0.62	7.85660307944649e-58
SCIN	8.76313023407685e-62	-0.591842	0.575	0.685	1.93963124601057e-57
PIM1	3.13293287504872e-61	-0.835175	0.164	0.288	6.93443362563285e-57
LAP3	7.53652351760742e-61	-0.624058	0.361	0.503	1.66813411538723e-56
CPEB4	1.19093776274597e-60	-0.526303	0.642	0.748	2.63602164406192e-56
GRID2	1.79308215434352e-60	-0.435268	0.451	0.597	3.96880804042395e-56
TLR2	2.7450817379639e-60	-0.383628	0.81	0.887	6.0759639188093e-56
ADGRG1	7.50834265555775e-60	-0.464992	0.578	0.702	1.66189656338115e-55
IKZF1	9.5837791205477e-60	-0.387881	0.834	0.904	2.12127367054203e-55
ARHGAP26	1.08300696505649e-59	-0.229391	0.996	0.999	2.39712761645603e-55
ADGRD1	2.64933193468094e-59	-1.71508	0.052	0.129	5.8640313042228e-55
CD83	4.10164348736551e-59	2.07994	0.189	0.077	9.07857769493482e-55
POU2F2	1.42928225767e-58	-0.387702	0.649	0.781	3.16357334912677e-54
HSPH1	1.17559237431494e-57	1.49511	0.376	0.253	2.60205616130869e-53
ALOX5	8.83234831053934e-57	-0.388174	0.709	0.814	1.95495197505478e-52
TLN2	1.49044293147447e-56	-0.425053	0.644	0.755	3.2989463845256e-52
PTPN2	5.417336535132e-56	-0.412447	0.645	0.759	1.19907326868612e-51
LINC01480	5.69409348424263e-56	-0.95416	0.12	0.224	1.26033065180226e-51
KLHL2	9.5006105293531e-56	-0.577613	0.414	0.551	2.10286513456702e-51
MIR3667HG	8.79028248427521e-55	0.748777	0.43	0.288	1.94564112506947e-50
PSTPIP2	1.05013418867165e-54	-0.763687	0.257	0.387	2.32436701320582e-50
IL4R	2.05908517200363e-54	-0.486367	0.496	0.628	4.55757911971283e-50
RASGEF1C	1.01070887098339e-53	-0.405515	0.491	0.642	2.23710301503463e-49
SP100	1.1421519230059e-53	-0.331807	0.855	0.916	2.52803906638127e-49
LINC00486	3.31183269155285e-53	-0.625014	0.429	0.551	7.33041047948307e-49
NAIP	8.07092709527741e-53	-0.484553	0.526	0.648	1.7864190032687e-48
KCNQ3	9.55737494392214e-53	-0.346773	0.94	0.971	2.11542937008773e-48
RUNX1	4.67069279242465e-52	-0.290946	0.968	0.977	1.03381114267527e-47
GAREM1	1.90539670501336e-50	-0.506411	0.566	0.673	4.21740506687656e-46
SLC8A1	2.81761070210787e-50	0.288696	0.986	0.974	6.23649952804555e-46
KCNIP1	1.45466702381324e-49	-0.499426	0.424	0.558	3.21975999050822e-45
TBC1D14	1.65582473140341e-49	-0.271003	0.735	0.854	3.66500246048831e-45
ADAMTSL2	2.35607563717282e-48	-0.668989	0.218	0.338	5.21493781531833e-44
HRH2	4.12706119336872e-48	-0.630175	0.308	0.43	9.13483724540234e-44
MROCKI	3.01770006369496e-47	-0.631835	0.261	0.383	6.67937732098243e-43
HCK	3.45377986308587e-47	-0.387923	0.621	0.733	7.64459634895426e-43
DUSP1	4.0679935069996e-47	1.22763	0.213	0.106	9.00409682839291e-43
TLE1-DT	5.02200714552529e-47	-1.24776	0.049	0.117	1.11157106159057e-42
SYNDIG1	3.15745764107254e-46	-0.264997	0.749	0.854	6.98871674274995e-42
IKZF2	4.62459241510948e-46	-0.690928	0.279	0.397	1.02360728516033e-41
PALD1	2.56149472269508e-45	-0.266854	0.911	0.956	5.66961241921328e-41
APOC2	4.39644173296918e-45	-0.746849	0.242	0.356	9.73108413175399e-41
TBC1D8	7.00688472595845e-45	-0.462939	0.39	0.52	1.55090386524364e-40
C3orf70	1.16722107850387e-44	-0.933524	0.124	0.216	2.58352713516046e-40
DDX5	1.84367360284578e-44	0.37592	0.87	0.807	4.08078715253886e-40
PLCXD3	2.04709739495274e-44	-0.975034	0.105	0.192	4.53104537398839e-40
KCNIP4	3.28699582335664e-44	-0.207202	0.849	0.921	7.2754365554176e-40
ERC2	3.97297808478833e-44	-0.456454	0.507	0.63	8.7937896928705e-40
PIK3AP1	6.53564933274721e-44	-0.393143	0.728	0.811	1.44660062331027e-39
NCK2	8.19993673623628e-44	-0.348913	0.863	0.908	1.81497399719854e-39
SRGAP2B	1.22687495983849e-43	0.296909	0.933	0.917	2.71556503610651e-39
IFI16	6.2501550883388e-43	-0.331907	0.747	0.823	1.38340932725291e-38
ABHD3	1.23438875437772e-42	0.650855	0.503	0.392	2.73219606893964e-38
RAPGEF1	4.8914704575046e-42	0.380809	0.895	0.858	1.08267807106407e-37
TLR10	5.681223889607e-42	-0.702875	0.202	0.308	1.25748209572561e-37
MPZL1	6.56042480923408e-42	-0.500859	0.517	0.618	1.45208442727587e-37
ALPK1	3.1327291569523e-41	-0.3391	0.695	0.784	6.93398271599821e-37
TTTY14	3.26545512452918e-41	-0.653815	0.187	0.291	7.22775837263288e-37
GASK1B	3.57414769604101e-41	-0.713102	0.181	0.284	7.91101851041718e-37
MEIS1	1.48199933377307e-40	-1.77597	0.022	0.067	3.28025732537331e-36
SIPA1L2	3.97126605107306e-40	-0.392114	0.677	0.764	8.79000027744512e-36
USP9Y	5.86306396347255e-40	-0.573789	0.22	0.329	1.29773057767501e-35
SFMBT2	8.21512973001297e-40	0.306876	0.987	0.987	1.81833681444107e-35
PDE3B	1.33492902346002e-39	0.44153	0.8	0.735	2.95473190052642e-35
STK3	2.10274913590146e-39	-0.327528	0.727	0.804	4.65422493740428e-35
EIF4G3	2.78004753146131e-39	-0.234204	0.953	0.977	6.15335720613647e-35
HLA-DQB1	3.72790371849957e-39	-0.677311	0.171	0.269	8.25134209052694e-35
GNA13	4.47427714031583e-39	0.866866	0.526	0.43	9.90336502237505e-35
PDK1-AS1	7.49934744268995e-39	-0.884078	0.134	0.222	1.65990556296499e-34
CHI3L1	1.62079512019192e-38	-1.42716	0.031	0.081	3.5874679190328e-34
LERFS	1.75266847541236e-37	-1.8341	0.017	0.055	3.87935640347771e-33
IL17RA	1.77761567906724e-37	-0.367108	0.618	0.713	3.93457454404743e-33
UTY	2.33019498170161e-37	-0.457963	0.251	0.364	5.15765357249834e-33
MS4A6A	3.04108653975487e-37	0.435873	0.62	0.515	6.73114094709343e-33
HSP90AA1	4.44545479960352e-37	1.15752	0.51	0.43	9.83956965344242e-33
LINC02899	6.02676936186603e-37	2.65152	0.085	0.023	1.33396513055543e-32
MT-CYB	1.11129105697127e-36	-0.409661	0.363	0.484	2.4597316255002e-32
CD163L1	1.13146824512731e-36	0.837897	0.292	0.189	2.50439181376478e-32
LILRB1	1.29203170495454e-36	-0.562674	0.308	0.417	2.85978297574637e-32
DLGAP2	2.34403820984833e-36	-0.694448	0.347	0.449	5.18829417367829e-32
PICALM	3.8112018486917e-36	-0.256845	0.991	0.993	8.4357141718942e-32
PFKP	4.88476499091418e-36	-0.791296	0.16	0.25	1.08119388308894e-31
ESR1	7.00837030622312e-35	0.844027	0.24	0.144	1.55123268357942e-30
ENO1	8.40345834836955e-35	-0.478715	0.247	0.353	1.86002147082812e-30
RASSF8	9.95039942994141e-35	-0.387837	0.706	0.79	2.20242140982323e-30
GPRC5D-AS1	1.03924296216329e-34	-1.20876	0.043	0.097	2.30026037245222e-30
MALAT1	1.29126040503047e-34	0.483274	1	1	2.85807578049444e-30
RHOH	1.41703987486652e-34	-0.743461	0.183	0.274	3.13647605902955e-30
IL15	1.61014777602729e-34	0.898735	0.211	0.119	3.56390108745881e-30
CYRIA	1.96980388294224e-34	0.504823	0.487	0.381	4.35996391450435e-30
FGD2	2.24973403237465e-34	-0.30422	0.684	0.773	4.97956130725804e-30
MLXIPL	2.71662649437273e-34	-0.492208	0.348	0.453	6.01298108264459e-30
LINC02513	5.30017044771706e-34	-1.32463	0.027	0.071	1.17313972689769e-29
CUL1	8.17198918248203e-34	-0.436584	0.518	0.608	1.80878808565057e-29
LINC00578	2.95623446459822e-33	-0.568992	0.25	0.35	6.54332936394169e-29
MT-ATP6	3.78427841647576e-33	-0.301556	0.408	0.523	8.37612184702745e-29
SRGN	4.83859775490881e-33	0.810991	0.536	0.459	1.07097522707152e-28
LMO2	5.79695712197216e-33	-0.488665	0.317	0.422	1.28309848937732e-28
CYFIP1	1.30913726019166e-32	-0.263773	0.912	0.934	2.89764441170821e-28
GCA	1.49700588136257e-32	-0.476909	0.318	0.421	3.31347281780791e-28
LINC00278	1.53479697399912e-32	-0.407472	0.213	0.315	3.39711962224964e-28
EML4	1.87532781819807e-32	-0.330261	0.718	0.787	4.1508505927996e-28
ADARB2	1.91791630475476e-32	-0.611957	0.163	0.25	4.24511594894419e-28
MT-ND3	3.13134343601745e-32	-0.360175	0.414	0.523	6.93091556128102e-28
LINC02232	4.82711396973156e-32	-0.323886	0.681	0.766	1.06843340606038e-27
LINC00623	6.15636721332215e-32	-0.649798	0.172	0.259	1.36265031899673e-27
CEACAM21	6.80786038030141e-32	-0.705483	0.171	0.257	1.50685181657592e-27
RBFOX1	1.45559767611739e-31	-0.202681	0.743	0.833	3.22181989631823e-27
PDGFB	2.96215886661275e-31	0.471775	0.484	0.382	6.55644243536066e-27
JARID2	2.98796675978276e-31	0.439331	0.561	0.464	6.61356562610316e-27
APBA2	4.29195752129444e-31	-0.794477	0.127	0.203	9.49981877763311e-27
NUDT3	8.28426555639776e-31	-0.507943	0.304	0.402	1.83363933825308e-26
DNAJB6	9.3916233442323e-31	0.509873	0.526	0.44	2.07874191101238e-26
CACNA1A	1.33080406825625e-30	-0.278141	0.638	0.744	2.94560172467838e-26
SPP1	1.48277853396632e-30	-0.176781	0.804	0.861	3.28198200708106e-26
ELMO1	2.58187219959946e-30	0.1659	0.995	0.995	5.71471592659344e-26
MGAT4A	2.66605224284142e-30	-0.211915	0.95	0.97	5.9010400343052e-26
CD163	4.083451781963e-30	0.624922	0.373	0.273	9.03831217419691e-26
C1RL	4.36360732125212e-30	-0.592582	0.178	0.264	9.65840844485943e-26
ATP2B4	4.54480262281089e-30	-0.494829	0.285	0.382	1.00594661253296e-25
MS4A7	5.49046439115135e-30	0.539407	0.469	0.376	1.21525938833744e-25
JAG2	6.66937760868164e-30	-1.11261	0.053	0.106	1.47620003990559e-25
ITGB3	7.14295581256716e-30	-1.06181	0.064	0.122	1.58102183955361e-25
SMAP2	7.32267558566229e-30	0.232168	0.932	0.91	1.62080101413049e-25
JAK3	7.43739854771408e-30	-0.43043	0.338	0.441	1.64619379455103e-25
TRERF1	7.5084260038832e-30	-0.595681	0.268	0.361	1.66191501169951e-25
HIVEP3	9.23451153458434e-30	-0.260248	0.766	0.83	2.0439667830649e-25
DLEU1	9.35088042723858e-30	-0.14321	0.904	0.981	2.06972387376499e-25
RASGEF1B	1.047797574466e-29	0.964955	0.201	0.119	2.31919515132303e-25
FKBP5	1.10848916760323e-29	-0.181283	0.933	0.968	2.45352992357299e-25
CD300A	1.28373041264654e-29	-0.450816	0.315	0.413	2.84140889535186e-25
SOX5	1.38722967970873e-29	-0.64025	0.261	0.35	3.07049417306731e-25
CALCRL-AS1	1.4854981296233e-29	-1.49691	0.03	0.072	3.28800156010821e-25
SH3PXD2B	2.42979410326076e-29	-0.475654	0.227	0.322	5.37810626815736e-25
ADGRG7	2.60574955672682e-29	5.83537	0.037	0.001	5.76756606885914e-25
LINC01500	3.13599537792878e-29	-1.48705	0.062	0.117	6.94121216950757e-25
ADAM28	3.88855248672616e-29	-0.204293	0.952	0.973	8.60692207411968e-25
PCNX2	4.04058851494983e-29	-0.244396	0.808	0.868	8.94343861898996e-25
ATP2C1	9.10067212375394e-29	0.382477	0.774	0.733	2.0143427678717e-24
ZFPM2-AS1	1.01147108629145e-28	-0.90315	0.097	0.164	2.23879010239749e-24
PDGFC	1.13838371509161e-28	0.51779	0.442	0.346	2.51969851498377e-24
PYGL	1.93415449095169e-28	-0.514293	0.36	0.452	4.28105755027247e-24
XACT	2.10758895421938e-28	-0.678158	0.154	0.234	4.66493739126917e-24
MB21D2	2.46190443827963e-28	0.828272	0.251	0.163	5.44917928368813e-24
MEG3	3.71459277146389e-28	-0.254487	0.578	0.685	8.22187964035817e-24
RNF17	4.16874868161224e-28	-2.03823	0.007	0.031	9.22710833188053e-24
CHD9	4.21830542172954e-28	-0.211243	0.939	0.963	9.33679722045617e-24
LIMK2	4.48742100743065e-28	-0.394779	0.32	0.419	9.932457657847e-24
LSP1	6.32954368210388e-28	-1.17982	0.039	0.084	1.40098119859687e-23
CX3CR1	9.15450425777445e-28	-0.314321	0.487	0.588	2.0262579724158e-23
USP15	9.22351020172638e-28	-0.206911	0.881	0.916	2.04153174805012e-23
BAG3	1.24852847187758e-27	1.61188	0.1	0.042	2.76349291965384e-23
IRS2	1.40565283178025e-27	0.535826	0.483	0.393	3.1112719778624e-23
LAPTM5	1.47398854130822e-27	-0.324323	0.574	0.657	3.26252623733162e-23
MMRN1	1.61388100387621e-27	-0.906849	0.081	0.142	3.5721642139796e-23
MT-CO3	3.04712016273693e-27	-0.238772	0.542	0.643	6.74449576820193e-23
OCLN	4.33332651865035e-27	-1.39885	0.022	0.057	9.59138491638068e-23
ADGRG6	5.16223706764232e-27	0.992711	0.145	0.075	1.14260955255195e-22
APCDD1	6.46946453373362e-27	-1.00721	0.053	0.104	1.4319512798966e-22
ROR1-AS1	7.11541116722253e-27	-1.65357	0.014	0.042	1.57492510775303e-22
PREX1	7.49349494712751e-27	-0.192554	0.944	0.97	1.6586101715972e-22
C1QB	1.17572839824929e-26	-0.309996	0.621	0.705	2.60235723668499e-22
UBE2J1	1.28480765378936e-26	-0.559372	0.199	0.282	2.84379326089736e-22
SGK1	1.36480903178557e-26	0.63169	0.448	0.365	3.02086831095419e-22
FCGR1A	1.7602173302356e-26	-0.492726	0.287	0.376	3.89606503874348e-22
ATG7	2.12773634207096e-26	0.2923	0.86	0.82	4.70953161953987e-22
MT-ND4	2.17596357046994e-26	-0.250615	0.424	0.531	4.81627776687816e-22
CH25H	2.73994613639446e-26	1.55757	0.093	0.038	6.0645967782955e-22
MT-ND1	2.96500326089799e-26	-0.388175	0.286	0.379	6.56273821767161e-22
TREML1	3.25923596593205e-26	-0.832977	0.082	0.141	7.213992886994e-22
LMNB1	5.07928527797643e-26	-0.892129	0.079	0.137	1.1242490034273e-21
ARHGAP12	5.18092442354341e-26	-0.226569	0.828	0.874	1.1467458119071e-21
ANKS1A	6.05510505464129e-26	-0.266244	0.907	0.929	1.3402369527943e-21
CSF1R	6.84604797972824e-26	-0.177415	0.903	0.955	1.51530425983305e-21
CHORDC1	7.96829179299502e-26	0.807198	0.302	0.22	1.76370170546152e-21
IRF8	1.03146510270289e-25	-0.479058	0.401	0.486	2.28304485832258e-21
TGFBI	1.35713996515628e-25	1.48652	0.089	0.036	3.00389359887691e-21
FCGR1BP	1.63147382633745e-25	-0.437721	0.236	0.323	3.61110416721531e-21
CREM	2.0758763864328e-25	0.787707	0.293	0.21	4.59474479373037e-21
EFCAB13	2.51621053095909e-25	0.524483	0.37	0.281	5.56938038922484e-21
PPA1	2.70661109870211e-25	-0.650534	0.151	0.224	5.99081300586724e-21
DNAJB1	2.89639698487598e-25	1.43458	0.119	0.059	6.4108850863245e-21
FRMD4B	2.97032116395044e-25	0.26637	0.809	0.757	6.5745088642879e-21
SLC9A9	4.23317483976335e-25	0.20368	0.977	0.979	9.36970919033221e-21
CYP27C1	4.23847859384801e-25	-1.24144	0.03	0.068	9.38144851962319e-21
GPM6A	8.65186862210689e-25	-0.350091	0.353	0.449	1.91500460081714e-20
NRXN1	1.17248661936167e-24	-0.204369	0.585	0.686	2.59518188329513e-20
PLTP	1.716033983824e-24	-1.18253	0.097	0.156	3.79826961979604e-20
RNF150	2.19887762800067e-24	0.458973	0.542	0.471	4.86699574181669e-20
SIGLEC9	2.21348565071602e-24	-0.550884	0.236	0.316	4.89932913929484e-20
NRG3	2.60972692893121e-24	-0.23571	0.582	0.685	5.77636958449634e-20
PXN	2.69325480254673e-24	-0.569023	0.191	0.268	5.96125017995693e-20
PTPN14	3.11993289746757e-24	0.787277	0.205	0.131	6.90565947525472e-20
ARHGAP21	4.54057159482883e-24	0.276343	0.789	0.736	1.00501011679941e-19
STAMBPL1	1.17854258278677e-23	-0.406989	0.412	0.493	2.60858615274023e-19
PRKY	1.22719597881956e-23	-0.478348	0.16	0.235	2.71627557951922e-19
LY75	1.86006664351255e-23	-0.615766	0.168	0.239	4.11707150875069e-19
GNG10	2.26006824305746e-23	-0.460976	0.238	0.32	5.00243504918337e-19
PRDM1	2.31165898685578e-23	0.776379	0.211	0.137	5.11662600150658e-19
MORN1	2.90771950196211e-23	-1.0228	0.043	0.085	6.43594634564294e-19
LDHA	3.66197640829383e-23	-0.60041	0.163	0.233	8.10541858211756e-19
RPLP1	4.19016138313473e-23	-0.472287	0.394	0.474	9.2745032054304e-19
HK2	4.49651184881209e-23	-0.329194	0.327	0.412	9.95257932616068e-19
GAS6	6.69474005511283e-23	-0.328631	0.441	0.533	1.48181376379867e-18
F13A1	9.68540907119986e-23	-0.784996	0.124	0.186	2.14376844381938e-18
ARID5B	1.0092473876796e-22	0.844577	0.351	0.276	2.23386816789002e-18
NLRC5	1.10867030219381e-22	-0.407291	0.31	0.395	2.45393084687577e-18
DOCK1	1.37524710292871e-22	1.33016	0.119	0.062	3.04397193762241e-18
PRKCD	1.41259576860011e-22	-0.386644	0.342	0.428	3.12663947421949e-18
NFIA	1.51688275696338e-22	0.326085	0.674	0.614	3.35746829426274e-18
ATP11C	1.6238834257502e-22	-0.344749	0.453	0.535	3.59430357455549e-18
FBN2	1.73192373151994e-22	2.82895	0.045	0.009	3.83343998734623e-18
GPI	1.98043361883709e-22	-0.467971	0.272	0.353	4.38349177193402e-18
ITPR2	1.98363235574587e-22	-0.15309	0.991	0.999	4.3905718562079e-18
CLEC17A	2.13179820393399e-22	-0.990565	0.045	0.088	4.7185221445875e-18
MT-ATP8	2.3624599947772e-22	-0.75073	0.095	0.152	5.22906895243985e-18
THRB	2.45573345819912e-22	0.581277	0.388	0.311	5.43552043637793e-18
CRACDL	2.66056433424498e-22	-0.517493	0.202	0.278	5.88889309741784e-18
DDX21	3.38502736006813e-22	-0.495363	0.248	0.327	7.4924195587748e-18
PUM3	3.71213336764469e-22	-0.3713	0.348	0.435	8.21643599594477e-18
PADI2	3.73859769252002e-22	0.593688	0.541	0.483	8.27501213262382e-18
ATF5	4.60413206888215e-22	-0.979989	0.066	0.114	1.01907859212638e-17
GRAMD1A	4.72590901162797e-22	-0.432327	0.33	0.411	1.04603270063373e-17
LCP2	5.41267857177704e-22	-0.322568	0.499	0.581	1.19804227507713e-17
METTL21A	5.92168010704423e-22	0.651155	0.268	0.192	1.31070467489317e-17
BHLHE41	7.52168858191265e-22	-0.185218	0.673	0.761	1.66485055072055e-17
DTNB	8.58573469396531e-22	-0.251414	0.728	0.787	1.90036651716228e-17
PTK2	9.83867097024724e-22	-0.250052	0.728	0.79	2.17769143255452e-17
PIGL	1.0345958931498e-21	-0.513828	0.209	0.284	2.28997454989776e-17
PBX3	1.07097308060674e-21	0.458612	0.45	0.364	2.37049181661496e-17
ASAH1	1.21633389538843e-21	0.38101	0.506	0.428	2.69223344405276e-17
VSIG4	1.92734605268631e-21	-0.323837	0.483	0.569	4.26598775301588e-17
SLC20A1	2.18658623167072e-21	-0.533908	0.197	0.269	4.83978996517997e-17
AMOT	2.42454039749266e-21	-0.654514	0.124	0.186	5.36647771581026e-17
NUP50-DT	2.54392324530948e-21	-0.465823	0.203	0.278	5.630719711168e-17
SLC11A2	2.70032816350204e-21	-0.32903	0.525	0.592	5.97690635709541e-17
NABP1	2.78587100677965e-21	-0.378631	0.326	0.41	6.16624688640608e-17
MPC2	3.31824014323511e-21	-0.688915	0.123	0.184	7.34459273303658e-17
CLEC2B	5.14323357385144e-21	0.990711	0.183	0.117	1.13840331923628e-16
SIRPD	5.15164021601317e-21	2.3033	0.045	0.011	1.14026404541236e-16
LINC01094	5.41218284449934e-21	-0.295317	0.492	0.576	1.19793255080148e-16
SDCBP	9.50601371069619e-21	0.567346	0.36	0.283	2.10406107472549e-16
FBXL20	1.06669338840708e-20	0.37746	0.471	0.39	2.36101914590024e-16
SRGAP2	1.29699442167365e-20	0.133453	0.994	0.996	2.87076745293245e-16
HDAC4	2.38377320481666e-20	-0.242288	0.693	0.762	5.27624361154119e-16
NECTIN3	2.40087883618133e-20	-0.546944	0.174	0.242	5.31410521600376e-16
ME2	2.7694781248803e-20	-0.369183	0.444	0.519	6.12996288161004e-16
CELF2	3.09794361575003e-20	0.131668	0.997	0.998	6.85698839910112e-16
KLHL6	4.02726463822277e-20	0.467299	0.363	0.285	8.91394755024227e-16
SYK	4.74886254196171e-20	-0.177266	0.901	0.932	1.05111323503781e-15
DNAJA1	4.85494300015901e-20	0.65694	0.243	0.172	1.0745930836552e-15
RGS2	4.95757275807574e-20	1.15786	0.081	0.035	1.09730915427248e-15
SERPINF1	5.13139248840094e-20	-0.92981	0.046	0.086	1.13578241338266e-15
CNTN5	5.40426787902316e-20	-0.334817	0.323	0.407	1.19618065234299e-15
SLC1A2	5.49666730898222e-20	-0.483586	0.111	0.169	1.21663234217012e-15
PEAK1	5.91538232257222e-20	0.349198	0.654	0.596	1.30931072327813e-15
CPED1	6.5914083641026e-20	0.432657	0.747	0.736	1.45894232731047e-15
LINC01591	6.67320970581873e-20	-1.88956	0.009	0.029	1.47704823628592e-15
PTPRE	6.72611833390735e-20	-0.166842	0.933	0.958	1.48875903202705e-15
ATOH8	6.90908148753227e-20	1.59801	0.056	0.018	1.52925609645039e-15
SYTL3	8.02781808554373e-20	0.532226	0.345	0.273	1.77687725505425e-15
CPQ	8.6582316238325e-20	0.306285	0.616	0.547	1.91641298761909e-15
GPR160	8.83125000050073e-20	-0.539719	0.151	0.215	1.95470887511083e-15
ATF7IP	1.16022586477221e-19	0.30544	0.658	0.595	2.56804392908682e-15
ANKMY1	1.38677432620285e-19	-0.423436	0.309	0.383	3.06948629361738e-15
ITGAX	1.39353445329592e-19	0.404916	0.504	0.433	3.08444915892519e-15
CA8	1.58771809111372e-19	-0.47201	0.161	0.228	3.51425522287111e-15
KIF26B	1.84137294125068e-19	0.757837	0.259	0.191	4.07569486816426e-15
SMCO4	2.32713846915748e-19	-0.445053	0.237	0.309	5.15088828763317e-15
ARHGAP24	2.58357470851137e-19	0.153469	0.995	0.995	5.71848425981906e-15
SPTLC3	3.21878926430798e-19	0.633438	0.261	0.19	7.12446815761929e-15
CLEC5A	3.30323912773616e-19	0.819761	0.154	0.095	7.31138948533121e-15
ST6GAL1	3.35526786936783e-19	-0.158071	0.988	0.994	7.42654990205874e-15
SIRPB1	3.70670261231438e-19	1.87386	0.043	0.011	8.20441556209665e-15
FGD4	3.75639016179364e-19	0.19532	0.972	0.969	8.31439398411405e-15
PILRA	3.7623796988456e-19	0.416728	0.411	0.333	8.32765122542486e-15
LINC01909	4.31931104859278e-19	-0.557318	0.149	0.211	9.56036307495526e-15
ASPH	5.14446279183018e-19	-0.369383	0.365	0.442	1.13867539434369e-14
LRRC3B	5.30945131935741e-19	-1.08186	0.024	0.054	1.17519395502657e-14
LINC01609	5.34493517663635e-19	-1.5286	0.012	0.034	1.18304795199669e-14
FGF2	5.39329765390249e-19	-1.33304	0.02	0.048	1.19375250271478e-14
MIR210HG	5.7474885345185e-19	-1.19027	0.025	0.054	1.27214911223032e-14
LITAF	5.83623618611058e-19	0.594359	0.297	0.226	1.29179251743372e-14
LINC00558	5.95048968591855e-19	-1.538	0.011	0.033	1.31708138708121e-14
ZNF804A	6.7415052341044e-19	0.795789	0.265	0.2	1.49216476851667e-14
PARP9	8.61022197625948e-19	-0.331734	0.34	0.419	1.90578653222527e-14
NAA15	8.96219140121402e-19	-0.320739	0.415	0.493	1.98369144474471e-14
DPYD	1.09568137446256e-18	0.338108	0.722	0.656	2.42518115423542e-14
SYT17	1.09702452496154e-18	-0.266655	0.556	0.628	2.42815408354987e-14
FLVCR2	1.4896083156385e-18	-0.543336	0.165	0.228	3.29709904583427e-14
HEATR5B	1.5647401839334e-18	-0.270106	0.554	0.62	3.4633959231182e-14
MKNK1	1.60811127688424e-18	-0.191761	0.768	0.823	3.55939350025557e-14
RAD51B	1.6386709085009e-18	0.249697	0.825	0.792	3.6270341888759e-14
NR4A1	1.6950209723744e-18	1.88032	0.047	0.014	3.7517594202535e-14
TNFRSF10D	1.78460216946698e-18	-0.466752	0.241	0.311	3.95003844189822e-14
CYTIP	1.87844390718172e-18	0.874817	0.195	0.133	4.15774774415602e-14
FOS	1.91195571340942e-18	0.811672	0.159	0.1	4.23192277606041e-14
FLT1	1.95252112816923e-18	-0.563563	0.13	0.186	4.32171026508978e-14
PDK1	1.98399922922586e-18	-0.442177	0.244	0.315	4.39138389396851e-14
C1QC	1.98453010704424e-18	-0.306256	0.491	0.565	4.39255893893172e-14
TMED8	2.05474971599753e-18	-0.440585	0.25	0.322	4.54798302138893e-14
OSBPL3	2.06291784303902e-18	0.273994	0.672	0.618	4.56606235378256e-14
KCNMA1	2.11735324637659e-18	0.251361	0.947	0.927	4.68654967552993e-14
KALRN	2.13904941899404e-18	-0.279669	0.313	0.395	4.73457198400142e-14
RUNX2	2.17155607620618e-18	-0.232221	0.767	0.82	4.80652221907476e-14
CPA6	2.40449914950071e-18	0.818446	0.146	0.089	5.32211841750486e-14
STARD13	2.56334166645925e-18	0.511205	0.482	0.415	5.6737004445409e-14
ACER3	2.73939264826964e-18	-0.257172	0.557	0.636	6.06337168768002e-14
ELL2	2.76261008883964e-18	0.455629	0.771	0.741	6.11476117063766e-14
ARHGAP15	2.85608221426924e-18	0.159218	0.969	0.964	6.32165237306353e-14
KDM5D	3.02453572042738e-18	-0.712947	0.086	0.135	6.69450736359395e-14
DIRC3	3.89282330394261e-18	1.19426	0.179	0.121	8.61637510094658e-14
CLIC2	5.03343375871328e-18	0.819786	0.162	0.104	1.1141002281536e-13
NRP1	5.08370459956724e-18	0.440093	0.342	0.266	1.12522717606821e-13
HOPX	5.53218799255273e-18	-0.987471	0.054	0.093	1.22449449027162e-13
UBC	5.56279255085022e-18	0.69683	0.329	0.263	1.23126850320519e-13
KCNK13	5.62089445962073e-18	-0.287262	0.559	0.629	1.24412877969245e-13
TRIM25	6.04045304109061e-18	-0.47988	0.22	0.286	1.336993876115e-13
PRPF4B	6.41578667021935e-18	-0.314736	0.455	0.525	1.42007022158635e-13
LNCAROD	6.60010329495471e-18	-0.130308	0.847	0.895	1.46086686330527e-13
SIGLEC7	8.11942437952086e-18	-0.742233	0.071	0.115	1.79715339216315e-13
LINC01736	8.58605257014963e-18	-0.508191	0.155	0.216	1.90043687587692e-13
GRB2	8.70748561783034e-18	-0.138105	0.858	0.896	1.92731486665057e-13
USP53	9.45141543227721e-18	0.3651	0.683	0.642	2.09197629178024e-13
DELE1	9.85235257657423e-18	-0.326999	0.315	0.393	2.18071971929894e-13
KDM2A	1.04091863546067e-17	-0.203409	0.778	0.835	2.30396930772864e-13
NCKAP5	1.15904638737978e-17	-0.23499	0.659	0.724	2.5654332738264e-13
LINC02432	1.16783530757135e-17	0.759448	0.113	0.063	2.58488666977842e-13
SORL1	1.20441670096186e-17	0.134551	0.978	0.978	2.66585592590897e-13
KLHL24	1.27033924788191e-17	0.405719	0.364	0.289	2.81176889126183e-13
PDCD4	1.27554923417185e-17	0.415021	0.336	0.259	2.82330067491598e-13
RFPL1S	1.44919876906166e-17	-0.61634	0.116	0.17	3.20765655544108e-13
FAM157C	1.59226550319571e-17	-0.515158	0.17	0.232	3.52432046477339e-13
DACT1	2.23919450751574e-17	-1.00282	0.029	0.059	4.95623312293533e-13
HSPE1	2.30592540341436e-17	0.977143	0.151	0.097	5.10393528791735e-13
RNF217	2.31139338330693e-17	-0.390629	0.346	0.416	5.11603811461155e-13
PTGES3	2.35491068581296e-17	0.503788	0.464	0.404	5.21235931197841e-13
EIF4A1	2.54235417138105e-17	-0.332314	0.383	0.456	5.62724672293482e-13
OXR1	2.56452862401069e-17	-0.169956	0.897	0.935	5.67632765638526e-13
OTUD1	3.99998670673926e-17	1.26557	0.089	0.046	8.85357057669669e-13
DARS1	4.02718211032212e-17	-0.369404	0.378	0.446	8.91376488298697e-13
CECR2	4.14992216502088e-17	-0.608689	0.111	0.163	9.18543772005721e-13
LPAR1	4.21948647993444e-17	0.351825	0.445	0.368	9.33941137468688e-13
PIK3CD	4.33135270517803e-17	-0.293131	0.449	0.523	9.58701607764106e-13
SRGAP3	4.7531233698426e-17	-0.313519	0.548	0.607	1.05205632668096e-12
RASGRP2	5.00466837767941e-17	-0.707089	0.068	0.111	1.10773329871556e-12
CHCHD7	5.14626450664344e-17	-0.51086	0.172	0.233	1.13907418590046e-12
PAG1	5.6354781222409e-17	-0.158116	0.871	0.904	1.2473567275768e-12
RNF175	7.17168576340084e-17	-0.583216	0.115	0.167	1.58738092687114e-12
BCL6	8.60682662704508e-17	-0.230801	0.346	0.427	1.90503500563016e-12
CTSC	9.3095279075162e-17	-0.298815	0.497	0.568	2.06057090704964e-12
NR1D2	9.96746073184248e-17	0.665679	0.196	0.136	2.20619775838601e-12
STING1	1.10969312139323e-16	-0.634862	0.098	0.147	2.45619475489177e-12
LSAMP	1.11120879687649e-16	-0.129837	0.513	0.604	2.45954955100643e-12
MIR4300HG	1.11713797438795e-16	2.54562	0.059	0.024	2.47267319251028e-12
CCM2	1.22436688654142e-16	-0.289499	0.472	0.543	2.71001366667077e-12
BCAR3	1.30571415380012e-16	-0.323721	0.461	0.531	2.89006770802117e-12
CD226	1.32599644769403e-16	-0.524537	0.222	0.285	2.93496053732597e-12
WNT2B	1.37463096868762e-16	-0.414697	0.277	0.346	3.04260818609318e-12
TLR1	1.39487897156304e-16	-0.241732	0.559	0.629	3.08742511565764e-12
DNAJC5	1.4476499599677e-16	-0.262883	0.587	0.656	3.2042284213925e-12
CNTNAP2	1.5078359655553e-16	-0.129451	0.658	0.75	3.33744412616009e-12
ZNF385D	1.61237111026278e-16	-0.446386	0.158	0.219	3.56882221545565e-12
ITGAV	1.81052532079652e-16	-0.354709	0.458	0.521	4.00741674505102e-12
NR4A3	1.95891799448306e-16	2.61604	0.034	0.008	4.3358690889888e-12
FOXO3	2.01664570658821e-16	0.252343	0.657	0.592	4.46364360696235e-12
FHOD1	2.28628129270991e-16	-0.572419	0.121	0.173	5.06045501328411e-12
P2RY12	2.63248210750507e-16	-0.162879	0.728	0.798	5.82673589675172e-12
PROS1	2.6869400010114e-16	-0.387213	0.195	0.259	5.94727299823862e-12
ST6GALNAC3	3.3275882136322e-16	-0.146682	0.839	0.896	7.3652837520535e-12
HTRA1	3.45015669393497e-16	-0.338394	0.4	0.471	7.63657682635567e-12
SEMA3E	3.7173653945786e-16	-0.884586	0.041	0.075	8.22801656436027e-12
SPON1	3.76586061675394e-16	-1.11997	0.053	0.09	8.33535588912318e-12
ERBB4	4.00091767285268e-16	-0.179858	0.42	0.504	8.85563117709213e-12
SBNO2	4.30455193173009e-16	-0.470898	0.181	0.241	9.52769524569138e-12
OGFRL1	4.65663829815055e-16	0.293048	0.619	0.561	1.03070032091264e-11
MIR99AHG	5.18101765048392e-16	0.229496	0.781	0.741	1.14676644675811e-11
E2F3	5.27569166807057e-16	-0.260547	0.497	0.567	1.16772159381074e-11
TRA2A	5.56353676352087e-16	0.286841	0.58	0.518	1.23143322723771e-11
THEMIS2	5.5842402816733e-16	0.486511	0.278	0.212	1.23601574394557e-11
RECK	5.99146580047311e-16	-0.295829	0.378	0.455	1.32615104027672e-11
PLB1	6.36126280762081e-16	0.42143	0.325	0.256	1.40800190983879e-11
SAT1	6.90506824566154e-16	0.466377	0.848	0.82	1.52836780549473e-11
EBPL	7.00297860434812e-16	-0.660072	0.083	0.127	1.55003928428641e-11
XRRA1	7.8624794450469e-16	-0.375914	0.253	0.321	1.74028120036668e-11
DUSP10	8.28923996057011e-16	0.725457	0.162	0.108	1.83474037287259e-11
KYNU	8.37924027519196e-16	0.462586	0.459	0.392	1.85466104251099e-11
TENM2	8.38447809545806e-16	-0.273112	0.373	0.45	1.85582038164869e-11
GRIN2A	1.10683143283598e-15	-0.330468	0.234	0.302	2.44986069343915e-11
NCOA2	1.16737275693464e-15	0.243865	0.768	0.735	2.58386286019914e-11
KCNMB4	1.20674544378481e-15	-0.495213	0.157	0.214	2.6710103652733e-11
EZR	1.23962896583173e-15	-0.475033	0.155	0.212	2.74379475297195e-11
WDR43	1.26558629473494e-15	-0.359296	0.294	0.362	2.80124870476632e-11
PCBP3	1.26904099064597e-15	-0.544027	0.118	0.169	2.80889532869579e-11
CUX2	1.3809225610708e-15	-0.564142	0.08	0.124	3.0565339966741e-11
RGS1	1.63025793008348e-15	0.642057	0.39	0.338	3.60841290244677e-11
TMEM131L	2.0254258105715e-15	-0.283009	0.42	0.495	4.48307748911896e-11
CCR1	2.22882955749638e-15	-0.48264	0.153	0.209	4.9332913425625e-11
ZNF608	2.41912872356272e-15	-0.459113	0.152	0.209	5.35449951673373e-11
RABEP2	2.54157843374578e-15	-0.455117	0.163	0.22	5.6255297052529e-11
FGFR1	2.64969392087439e-15	1.13782	0.082	0.043	5.86483252446336e-11
DTNA	2.697906371047e-15	-0.218022	0.759	0.806	5.97154596167543e-11
MYBPH	2.70238616690533e-15	-2.39602	0.002	0.013	5.98146154182826e-11
ITPR2-AS1	2.73582407425683e-15	-0.589445	0.088	0.133	6.05547300596007e-11
STIP1	2.86871254488246e-15	0.666233	0.209	0.152	6.34960834684284e-11
ZFHX3	3.16413567978581e-15	0.14016	0.971	0.965	7.0034979136379e-11
MITF	3.70051941967e-15	0.455029	0.454	0.396	8.19072968349759e-11
EPHA1-AS1	4.13693717157744e-15	-0.774443	0.054	0.091	9.1566967355695e-11
MAP1B	4.20421757442115e-15	-0.358706	0.254	0.32	9.30561517922377e-11
LILRB4	4.93216557376637e-15	-0.386462	0.237	0.3	1.09168552809745e-10
LHFPL3	5.0316683078155e-15	-0.708487	0.064	0.103	1.11370946325188e-10
ESRP1	5.14234323357218e-15	-1.6704	0.007	0.023	1.13820625131887e-10
CXCR4	5.16588999769041e-15	0.809313	0.087	0.047	1.1434180920888e-10
CCDC26	5.54665832016428e-15	-0.400511	0.3	0.36	1.22769735258516e-10
OPCML	7.30168013332621e-15	-0.174001	0.504	0.585	1.61615388071042e-10
SYN3	7.85414665666992e-15	-0.291616	0.222	0.287	1.73843682098732e-10
MT-ND2	9.12664170729526e-15	-0.296704	0.309	0.38	2.02009087549273e-10
BANP	9.56816810465345e-15	0.395931	0.389	0.325	2.11781832828399e-10
PCDH11Y	1.05711831311134e-14	-0.899025	0.036	0.066	2.33982567424064e-10
PRKAG2	1.21992799132404e-14	0.248478	0.734	0.705	2.70018861599663e-10
DNAJC15	1.32081825106965e-14	-0.374537	0.237	0.3	2.92349911691756e-10
HS3ST4	1.38331610273262e-14	-0.172462	0.826	0.896	3.06183186178838e-10
UBE2O	1.59988573954927e-14	-0.398608	0.306	0.368	3.54118709591835e-10
SLCO2B1	1.68335404729001e-14	-0.151353	0.96	0.977	3.72593584827171e-10
PRR5	1.69247896473673e-14	-0.332045	0.235	0.299	3.74613294054828e-10
WNT5A	1.78881321192561e-14	-0.323788	0.296	0.363	3.95935916327616e-10
CD9	2.10241224398897e-14	1.24398	0.06	0.027	4.65347926084519e-10
XPO1	2.19458620083428e-14	0.263909	0.611	0.553	4.8574970969266e-10
RPL10	2.20517433220625e-14	-0.342086	0.387	0.449	4.88093286690532e-10
TOX	2.2925148365508e-14	-0.725229	0.12	0.167	5.07425233922153e-10
MOB3C	2.3883974242924e-14	-0.686665	0.062	0.099	5.2864788589288e-10
GSN	2.59956668584729e-14	-0.201764	0.641	0.696	5.75388090245439e-10
MT-ND5	2.92018997245007e-14	-0.315115	0.199	0.261	6.46354848502099e-10
NCMAP	3.2040115525636e-14	-0.805464	0.051	0.085	7.09175917044427e-10
TPRG1	3.24727360894017e-14	0.774054	0.179	0.127	7.18751540602817e-10
STAT3	4.33139449880023e-14	-0.213699	0.62	0.677	9.58710858364443e-10
RNASET2	4.68648728055471e-14	-0.171696	0.968	0.974	1.03730709467798e-09
TMEM176B	4.70832775437978e-14	-0.36404	0.217	0.277	1.04214126515442e-09
MED28-DT	4.83069779290189e-14	-0.485168	0.122	0.171	1.0692266494809e-09
PHYKPL	6.06897373730109e-14	-0.284726	0.45	0.509	1.34330664701422e-09
FAM118A	7.72185879254615e-14	0.530571	0.252	0.194	1.70915622514216e-09
FAM53B	8.77052784761009e-14	0.264509	0.607	0.552	1.94126863379002e-09
MAP3K8	9.09617677231166e-14	-0.20069	0.432	0.505	2.01334776678346e-09
NFATC2	1.03219333443731e-13	-0.187213	0.801	0.843	2.28465672644354e-09
GPR85	1.04814368316256e-13	-0.971363	0.033	0.06	2.319961228312e-09
MLXIP	1.04940821070003e-13	-0.239908	0.489	0.558	2.32276013356344e-09
NINJ1	1.05200901505558e-13	-0.332766	0.247	0.311	2.32851675392401e-09
KIRREL3	1.22708887003276e-13	-0.483378	0.221	0.279	2.7160385049305e-09
WDFY3	1.37125878477524e-13	-0.136936	0.934	0.948	3.03514419422151e-09
FAM89A	1.40972327996075e-13	-0.446685	0.137	0.187	3.12028150786512e-09
HIF1A	1.41914319530284e-13	0.510433	0.725	0.707	3.1411315484833e-09
ZDHHC19	1.47371810930526e-13	-1.00673	0.022	0.045	3.26192766313627e-09
FXR1	1.49158371437169e-13	0.347502	0.439	0.379	3.3014713933903e-09
ITM2B	1.57931678864836e-13	0.223333	0.813	0.795	3.49565977999429e-09
B4GALT5	1.5805422390982e-13	-0.430097	0.244	0.301	3.49837219201996e-09
HS2ST1	1.66746711105419e-13	-0.304078	0.325	0.389	3.69077170360735e-09
IFNAR2	1.68504493951585e-13	-0.276243	0.425	0.489	3.72967846912439e-09
TNFSF10	1.72130578153789e-13	-0.469991	0.126	0.175	3.80993821685596e-09
AMACR	1.79362595125976e-13	-0.700292	0.053	0.087	3.97001168051836e-09
MT-CO1	1.86958327304516e-13	-0.180941	0.489	0.562	4.13813561655815e-09
RPS4Y1	1.87210827479144e-13	-0.630065	0.072	0.111	4.14372445542338e-09
PPARD	1.88769513795593e-13	-0.215114	0.601	0.661	4.17822441835165e-09
VASH1	1.92905352296035e-13	0.35942	0.479	0.423	4.26976706772043e-09
RBM14	2.2344575929827e-13	0.375982	0.282	0.22	4.9457484363079e-09
ACACA	2.39809749138656e-13	-0.291676	0.412	0.476	5.30794898743501e-09
ENOX2	2.40453718771483e-13	-0.272063	0.316	0.384	5.32220261128799e-09
DOCK3	2.51925791433158e-13	-0.249871	0.378	0.446	5.57612546758152e-09
CNTNAP5	2.65946461493836e-13	-0.328456	0.212	0.272	5.88645897870457e-09
TTC7A	2.67423796210963e-13	0.261325	0.682	0.661	5.91915830533347e-09
TMEM63C	2.68333961080509e-13	-0.598343	0.083	0.123	5.93930389455598e-09
H3-7	2.76355458915915e-13	-0.690945	0.056	0.09	6.11685172764486e-09
GRIK2	2.76570317610388e-13	-0.259226	0.375	0.446	6.12160740998833e-09
COLGALT1	3.15437988696705e-13	-0.314288	0.358	0.419	6.98190444181286e-09
DTNBP1	3.26971970084492e-13	-0.274358	0.438	0.499	7.23719758585014e-09
APBB1IP	3.36168223520325e-13	-0.123565	0.984	0.993	7.44074745939888e-09
CLECL1	3.45726471611464e-13	0.639792	0.162	0.113	7.65230972264813e-09
CLTA	3.89229021104868e-13	-0.338019	0.251	0.312	8.61519515313516e-09
GSTM3	4.12083110124056e-13	-0.722775	0.047	0.079	9.12104755948585e-09
TNRC6B	4.25276434088051e-13	0.148484	0.878	0.852	9.41306859210493e-09
SDC2	4.67874064723356e-13	1.91435	0.054	0.025	1.03559245485868e-08
RASSF2	4.90061795448636e-13	-0.286381	0.441	0.504	1.08470277804601e-08
CSMD1	4.92975136238723e-13	-0.107865	0.697	0.775	1.09115116655079e-08
PER1	5.26081190633717e-13	0.466482	0.227	0.171	1.16442810734867e-08
TSPAN14	5.68054163447091e-13	-0.211258	0.664	0.72	1.25733108537379e-08
LTBR	5.7765856393025e-13	-0.367646	0.189	0.245	1.27858946540322e-08
MGAT5	7.19070724982693e-13	-0.165586	0.847	0.878	1.59159114267669e-08
NPL	7.3558062262624e-13	0.254525	0.74	0.717	1.62813415012092e-08
TOX2	7.39453856791142e-13	-0.833935	0.033	0.06	1.63670716662151e-08
GABARAPL1	7.92904400644779e-13	0.695083	0.13	0.086	1.75501460038715e-08
CTNNA2	8.08002552539198e-13	-0.210216	0.42	0.493	1.78843284979026e-08
TPCN1	8.11545312712362e-13	0.378088	0.35	0.288	1.79627439515754e-08
ABCA1	8.38416492570378e-13	-0.32059	0.388	0.451	1.85575106465527e-08
HERC4	8.58678080811477e-13	0.230509	0.795	0.779	1.90059806406812e-08
DSCAM	8.64666167944688e-13	-0.165509	0.629	0.701	1.91385209612877e-08
TMC8	8.65695306782544e-13	-0.302989	0.339	0.401	1.91612999203248e-08
AGBL1	9.61931815467576e-13	-0.941104	0.031	0.057	2.12913988035593e-08
GASK1B-AS1	9.6700572007324e-13	-0.413909	0.14	0.189	2.14037046081011e-08
ITGAL	9.80894700270701e-13	-0.406494	0.241	0.297	2.17111232957917e-08
STOM	9.97638224339178e-13	-0.291513	0.29	0.353	2.20817244575234e-08
SAXO2	1.00149718453576e-12	-1.29301	0.012	0.029	2.21671386825145e-08
SLC7A5	1.09693169976436e-12	0.59296	0.233	0.181	2.42794862425844e-08
CASK	1.10370882058475e-12	-0.255166	0.411	0.473	2.44294910348228e-08
ITGB2	1.10924805278019e-12	-0.278553	0.385	0.45	2.45520964002368e-08
PMS1	1.11058352014392e-12	-0.23799	0.426	0.492	2.45816556348655e-08
P2RY6	1.12254330465181e-12	-0.444744	0.136	0.184	2.48463735051632e-08
MCTP1	1.12837644257971e-12	0.466358	0.302	0.245	2.49754841800594e-08
TESC	1.16952941658285e-12	-0.571019	0.085	0.125	2.58863641066448e-08
EPHA6	1.20955405405513e-12	-0.326164	0.202	0.259	2.67722694324562e-08
NFE2L2	1.2444149851136e-12	0.314838	0.52	0.47	2.75438812805045e-08
SUSD6	1.25290284506816e-12	-0.118596	0.855	0.898	2.77317515727386e-08
PLXNC1	1.27321945910386e-12	0.660747	0.161	0.113	2.81814395078049e-08
RPS6KA1	1.36748086582573e-12	-0.257715	0.406	0.472	3.02678214841867e-08
ARNTL	1.36967123426924e-12	-0.27463	0.309	0.375	3.03163030993153e-08
SYP	1.38982562605811e-12	-0.53604	0.086	0.126	3.07624004071703e-08
RIPOR2	1.48252784702436e-12	-0.654875	0.078	0.116	3.28142713660372e-08
CDYL	1.69108382556709e-12	-0.190812	0.626	0.684	3.74304493951019e-08
PDE8A	1.88624387695562e-12	0.393657	0.54	0.487	4.17501219725358e-08
MPRIP	1.93847497527559e-12	-0.301392	0.379	0.439	4.290620510275e-08
TNFRSF1B	2.05589523168309e-12	0.359034	0.63	0.604	4.55051850580735e-08
DLGAP1	2.10896228657725e-12	-0.140663	0.54	0.614	4.66797712511008e-08
HIBCH	2.18367688262529e-12	0.394523	0.414	0.358	4.83335041200283e-08
GOLGA8M	2.32442042187704e-12	-1.68782	0.005	0.018	5.14487216178263e-08
RNF130	2.3959204403701e-12	0.160854	0.892	0.869	5.30313030271519e-08
FADS2	2.4498501273606e-12	-0.567224	0.074	0.111	5.42249827189994e-08
TBC1D4	2.71589849511704e-12	0.257165	0.58	0.523	6.01136972909206e-08
FGF14	2.87189033544408e-12	-0.169451	0.436	0.51	6.35664206847192e-08
SNX29	2.98635457313716e-12	0.148446	0.895	0.876	6.60999721218179e-08
NBPF1	3.01385513454373e-12	0.492574	0.192	0.142	6.67086695479909e-08
MT-CO2	3.06314362583646e-12	-0.128154	0.511	0.578	6.77996210142642e-08
IFITM10	3.10491269645181e-12	-0.554408	0.079	0.116	6.87241376232643e-08
MBNL1	3.11284577190648e-12	0.128755	0.987	0.986	6.8899728315378e-08
RAB29	3.13203442523614e-12	-0.376599	0.179	0.232	6.93244499681767e-08
TRMT11	3.16273046844886e-12	-0.294085	0.294	0.354	7.00038761886471e-08
SAMHD1	3.33951491945066e-12	-0.211242	0.594	0.642	7.3916823227121e-08
LPCAT3	3.35949703094707e-12	-0.448728	0.131	0.177	7.43591072829824e-08
BATF3	3.50478797696886e-12	-0.483707	0.126	0.171	7.75749770822288e-08
RPS6KA5	3.50894131865604e-12	0.420598	0.291	0.235	7.76669071471329e-08
LINC01619	3.5267169942751e-12	-0.701011	0.059	0.092	7.80603539512851e-08
TIFA	3.60185433924793e-12	-0.595276	0.063	0.097	7.97234439449137e-08
TLR7	3.66782170214536e-12	-0.376458	0.198	0.251	8.11835655552854e-08
OLR1	3.69069775530867e-12	0.72077	0.407	0.369	8.1689904116002e-08
MS4A14	3.88249070486426e-12	0.551487	0.192	0.142	8.59350492614654e-08
DST	4.30142433862238e-12	-0.14086	0.774	0.831	9.52077263110678e-08
SLC48A1	4.38686812326702e-12	-0.699019	0.049	0.08	9.70989390403923e-08
LEPR	4.66490263067744e-12	0.515972	0.228	0.176	1.03252954827415e-07
CTSB	4.70009699758944e-12	0.241757	0.884	0.885	1.04031946944645e-07
SLC16A3	5.17848378099994e-12	-0.338664	0.235	0.293	1.14620560008653e-07
CEBPB	5.2620334722952e-12	-0.211718	0.378	0.442	1.16469848875782e-07
FKBP4	5.40061773553967e-12	0.819668	0.098	0.061	1.19537272958435e-07
PLEKHG5	5.50010730314267e-12	-0.525896	0.109	0.151	1.2173937504776e-07
CC2D2B	5.63024635998231e-12	-0.440582	0.182	0.231	1.24619872931848e-07
SMAD3	5.6627549164792e-12	-0.186223	0.433	0.498	1.25339417321351e-07
PPP1R15A	6.22239429195603e-12	1.1558	0.059	0.03	1.37726475258155e-07
ADGRG5	6.39931198692196e-12	-0.560468	0.092	0.131	1.41642371518531e-07
YPEL2	6.47081650272468e-12	0.351823	0.363	0.305	1.43225052471308e-07
TANC2	6.55514216261026e-12	0.191905	0.842	0.831	1.45091516627215e-07
ZNF208	6.62862848786939e-12	-1.0817	0.024	0.046	1.46718062950501e-07
FAM114A1	6.67333106072245e-12	-0.361386	0.248	0.305	1.47707509698031e-07
GAPDH	6.77693080699539e-12	-0.257145	0.284	0.343	1.50000586482036e-07
ATF4	7.50096112406948e-12	-0.45159	0.145	0.192	1.66026273520154e-07
DPYD-AS1	7.56665977713646e-12	0.794764	0.139	0.097	1.67480447507138e-07
CDCP1	7.64120335469253e-12	0.632045	0.152	0.106	1.69130395052764e-07
PSAP	8.19759315176814e-12	0.227273	0.784	0.774	1.81445526821236e-07
OPRM1	8.26797660679976e-12	-0.185588	0.297	0.361	1.83003394214906e-07
PIP4K2A	9.42956124794655e-12	-0.139616	0.823	0.865	2.08713908662049e-07
CDH4	9.82410542058488e-12	-0.569705	0.051	0.082	2.17446749379226e-07
RPL18	9.85018990765963e-12	-0.353491	0.325	0.382	2.18024103416138e-07
COX10-DT	1.00468280894695e-11	0.350223	0.44	0.386	2.22376492932318e-07
CLNK	1.10520343102473e-11	-1.14238	0.014	0.032	2.44625727423013e-07
EXOC4	1.11316068144653e-11	0.146991	0.902	0.884	2.46386985231374e-07
NAA20	1.117657892515e-11	-0.312505	0.238	0.294	2.47382397929269e-07
CPE	1.1510310142051e-11	-0.441316	0.122	0.166	2.54769204684158e-07
MEP1A	1.24383915227778e-11	-0.810064	0.029	0.053	2.75311357965163e-07
TMIGD3	1.26812569102991e-11	-0.231205	0.385	0.449	2.8068694045256e-07
TBC1D2B	1.30111603319867e-11	-0.212189	0.525	0.582	2.87989022788193e-07
PTPRM	1.32933666679979e-11	0.461192	0.381	0.327	2.94235377829465e-07
IQGAP1	1.33158559455362e-11	0.371804	0.288	0.232	2.94733155498498e-07
PTH2R	1.40616109832858e-11	0.91063	0.109	0.071	3.11239697504048e-07
RYR2	1.51482894221555e-11	-0.213845	0.372	0.436	3.35292238069989e-07
RAPGEF4	1.51658427799969e-11	-0.35542	0.212	0.265	3.35680764092451e-07
VSTM4	1.54160322795079e-11	-1.04919	0.019	0.039	3.41218458474628e-07
RTTN	1.54263277186892e-11	-0.319686	0.5	0.556	3.41446337725467e-07
SLC12A9	1.55181147809067e-11	-0.369784	0.211	0.263	3.4347795256059e-07
SRGAP2C	1.56156197465432e-11	0.171304	0.873	0.861	3.45636127469986e-07
BNC2	1.64622713744535e-11	0.194133	0.802	0.77	3.64375914602154e-07
MIB1	1.66917264821363e-11	0.329549	0.457	0.403	3.69454673955606e-07
TENT5A	1.73415372089445e-11	0.646167	0.113	0.074	3.83837584582778e-07
GKAP1	1.75940532811825e-11	0.519418	0.184	0.136	3.89426775325692e-07
SNAP25	1.89463300016318e-11	-0.24197	0.277	0.338	4.19358068256119e-07
DCTN4	2.16905306784299e-11	-0.264099	0.417	0.476	4.80098206036367e-07
KLF7	2.18301482072055e-11	0.408445	0.312	0.257	4.83188500418286e-07
ADGRV1	2.28446659384651e-11	-0.434612	0.088	0.126	5.05643835881986e-07
TMTC4	2.34586103908671e-11	-0.511028	0.088	0.126	5.19232882391452e-07
KDM6A	2.42154122939457e-11	0.214939	0.688	0.66	5.35983935714195e-07
MTHFD1L	2.42980936356776e-11	-0.132166	0.892	0.925	5.37814004532088e-07
CEPT1	2.56092940543431e-11	-0.254004	0.377	0.438	5.66836114598831e-07
SLC22A23	2.60330757072254e-11	0.370899	0.295	0.241	5.76216097703727e-07
PKM	2.61199920928825e-11	-0.277994	0.31	0.369	5.78139904983861e-07
CLASP1	2.6417438818995e-11	0.187085	0.784	0.762	5.84723590819635e-07
EDA	2.7464458668263e-11	0.338454	0.396	0.341	6.07898328163333e-07
NRXN3	2.81247878246929e-11	-0.143122	0.589	0.654	6.22514053711754e-07
H2AC6	2.83903058297071e-11	0.290876	0.489	0.425	6.28391029234737e-07
KANSL1L-AS1	2.8946719817883e-11	-0.355179	0.178	0.228	6.40706696449023e-07
ATF3	2.9264552051847e-11	2.06066	0.046	0.021	6.4774159511558e-07
C2-AS1	3.2339197590938e-11	-1.43316	0.008	0.021	7.15795799477823e-07
R3HCC1L	3.4084591936106e-11	-0.268198	0.443	0.497	7.54428357913769e-07
LRRK1	3.52429910015287e-11	-0.152141	0.794	0.841	7.80068362827836e-07
ZSWIM6	3.58645478982888e-11	0.123881	0.973	0.971	7.93825903180724e-07
ITGA9	3.64724402862092e-11	-0.218939	0.511	0.572	8.07280993294954e-07
TMC6	3.77303717579084e-11	-0.345776	0.234	0.287	8.35124048489545e-07
DBNL	3.82831090877125e-11	-0.359116	0.21	0.262	8.47358336547429e-07
ARHGAP18	3.85722727670289e-11	0.377684	0.393	0.341	8.53758685425419e-07
ZBTB20	3.96039324525647e-11	0.175369	0.86	0.852	8.76593440905066e-07
CD86	3.96800692262232e-11	0.228149	0.651	0.599	8.78278652253225e-07
C5AR1	3.99466093839588e-11	0.607883	0.179	0.133	8.84178252104545e-07
ZNF536	4.29271855958298e-11	-0.659631	0.082	0.117	9.50150325978097e-07
SIGLEC5	4.39410348583069e-11	-0.503231	0.102	0.141	9.72590865553765e-07
ERCC6	4.61095625262165e-11	-0.31127	0.233	0.287	1.02058905695528e-06
INTS10	4.64236783006893e-11	-0.24349	0.431	0.488	1.02754169550746e-06
MIR100HG	4.85103810769898e-11	0.687665	0.205	0.16	1.07372877475809e-06
TNFRSF1A	4.89779137224133e-11	-0.232679	0.38	0.44	1.0840771423319e-06
ATP1B3	5.09373748886031e-11	0.472694	0.314	0.258	1.12744785578434e-06
LRRC8B	5.1912908690988e-11	-0.320978	0.234	0.288	1.14904032096633e-06
MAML2	5.52129230743731e-11	0.136567	0.984	0.978	1.22208283932817e-06
PELI2	5.55488953690224e-11	0.283003	0.404	0.344	1.22951925009794e-06
PABPC1	5.62967935669006e-11	-0.193285	0.612	0.662	1.24607322880978e-06
GSTM2	5.79090680558016e-11	-0.492446	0.093	0.131	1.28175931234711e-06
TNFRSF14	5.82477045421974e-11	0.686057	0.107	0.07	1.289254692337e-06
NUPR1	6.15829944135918e-11	1.2835	0.054	0.027	1.36307799835044e-06
CPVL	6.30405623748806e-11	0.305408	0.57	0.526	1.39533980760561e-06
ITGA6-AS1	6.4629795740204e-11	-1.60352	0.005	0.015	1.43051589891368e-06
CR1L	6.72630701712378e-11	-1.11081	0.013	0.03	1.48880079517018e-06
LINC02073	6.75838696203917e-11	2.01554	0.029	0.009	1.49590137017775e-06
PTPRD	7.37725933855438e-11	-0.134632	0.582	0.656	1.63288258199563e-06
MIR503HG	7.53576076501364e-11	-0.418307	0.144	0.189	1.66796528772812e-06
ST14	7.79762321665424e-11	-0.587576	0.085	0.121	1.72592592277425e-06
SPNS2	7.80376823902766e-11	-0.270733	0.352	0.41	1.72728606202638e-06
NCL	7.8164368570577e-11	-0.429299	0.144	0.188	1.73009013394115e-06
CADPS	8.07663403075421e-11	-0.299845	0.229	0.285	1.78768217636714e-06
UCK2	8.38789585540895e-11	-0.359219	0.175	0.224	1.85657686863622e-06
ATP11A	8.8621499074433e-11	-0.182327	0.669	0.719	1.9615482605135e-06
PABPC4	8.88032030758687e-11	-0.305972	0.257	0.311	1.96557009688128e-06
EXOC6	8.97089366105936e-11	-0.228005	0.483	0.539	1.98561760293888e-06
EYA2	9.72745499478262e-11	1.49132	0.054	0.028	2.15307488854518e-06
MSI2	9.9001110377778e-11	0.24786	0.558	0.507	2.19129057710174e-06
DNM1	1.0068899524098e-10	-0.277806	0.239	0.293	2.22865022066385e-06
SHISA9	1.00769359320076e-10	-0.34437	0.146	0.192	2.23042899919057e-06
TAFA1	1.05006829656073e-10	-0.296554	0.197	0.248	2.32422116760752e-06
RPL3	1.06793930230341e-10	-0.302178	0.307	0.361	2.36377685171838e-06
CXCL14	1.0876810257191e-10	-0.887457	0.026	0.047	2.40747318232666e-06
SLC39A1	1.22771482306255e-10	-0.579858	0.085	0.121	2.71742398936664e-06
GPBP1	1.26734764111433e-10	0.241719	0.591	0.546	2.80514726884245e-06
MIR223HG	1.37043462993058e-10	-0.230459	0.424	0.484	3.03332000988835e-06
SNHG14	1.3780859888306e-10	-0.103478	0.832	0.878	3.05025552767764e-06
STK17A	1.41480617960985e-10	-0.304537	0.264	0.32	3.13153199794845e-06
SYT1	1.47255317143169e-10	-0.106989	0.638	0.707	3.25934918964691e-06
CNPY3	1.5713902977517e-10	-0.258551	0.281	0.338	3.47811528504361e-06
SAMD4A	1.62993914882616e-10	0.281021	0.443	0.386	3.60770731201182e-06
KANSL1L	1.6668054647733e-10	0.313017	0.473	0.423	3.68930721572922e-06
LMO7	1.67905687745766e-10	-0.291539	0.251	0.306	3.71642449256477e-06
DEPTOR	1.68208577349787e-10	-0.376301	0.396	0.441	3.72312865106018e-06
HOTAIRM1	1.75981300032899e-10	0.598136	0.096	0.061	3.89517009492818e-06
MIS18BP1	1.80701580621767e-10	0.224811	0.55	0.491	3.9996487854822e-06
LINC01320	1.8611269970306e-10	-0.494965	0.046	0.073	4.11941849522753e-06
TENT2	1.89196235461057e-10	0.175487	0.788	0.753	4.18766947569503e-06
RYR1	1.90406347104518e-10	-0.159269	0.648	0.706	4.21445408681139e-06
TGIF1	1.95301022474078e-10	0.756709	0.088	0.055	4.32279283144123e-06
RPS18	1.98055087011619e-10	-0.316219	0.281	0.335	4.38375129591518e-06
LINC02712	2.0364078984897e-10	-0.182337	0.349	0.412	4.5073852425171e-06
GOLPH3	2.17213794645869e-10	-0.215801	0.414	0.471	4.80781013069167e-06
NPIPB5	2.21854927863487e-10	-0.331311	0.211	0.261	4.91053697333042e-06
SLC22A16	2.25819322450567e-10	-1.79738	0.004	0.013	4.99828488312084e-06
ARRDC3	2.29136324125985e-10	0.574926	0.137	0.097	5.07170339820456e-06
CTNND2	2.29901015100414e-10	-0.187724	0.374	0.435	5.08862906823256e-06
SOCS6	2.3762631447943e-10	-0.140363	0.6	0.652	5.2596208446877e-06
CSF3R	2.39996806692647e-10	-0.190205	0.575	0.629	5.31208931933505e-06
RIPK2	2.42870393261012e-10	0.485059	0.199	0.153	5.37569328443924e-06
SNHG15	2.5727363325276e-10	-0.537049	0.081	0.115	5.69449459841659e-06
GABRB2	2.57680001179015e-10	-0.280126	0.209	0.26	5.70348914609632e-06
VWC2	2.66930404445792e-10	-0.965535	0.046	0.072	5.90823757200317e-06
ANXA2	2.73097154259433e-10	1.21793	0.041	0.019	6.0447324123783e-06
TNFSF13	2.75085435669648e-10	-0.402043	0.112	0.152	6.088741033112e-06
YBX3	2.860447873765e-10	-0.301667	0.224	0.274	6.33131532379146e-06
GALM	2.88704484376598e-10	0.516279	0.172	0.129	6.39018505719162e-06
PDE1B	3.05034647060194e-10	-0.438132	0.11	0.149	6.75163687803034e-06
NAALADL2	3.12253652693371e-10	0.278628	0.49	0.442	6.91142234871508e-06
FCGR2B	3.26094062482412e-10	1.09765	0.048	0.024	7.21776597898571e-06
SOCS3	3.38799761694394e-10	-0.715373	0.039	0.064	7.49899392534372e-06
DENND4A	3.71083890820278e-10	-0.132317	0.779	0.819	8.21357083941604e-06
PSTPIP1	3.73708778415387e-10	0.794508	0.064	0.036	8.27167010144617e-06
FARSB	3.78144824187984e-10	-0.357285	0.21	0.257	8.36985753857684e-06
LRRC7	3.97335289585598e-10	-0.209977	0.367	0.425	8.79461929968762e-06
MIR4435-2HG	4.03439622867775e-10	0.774627	0.122	0.085	8.92973261255532e-06
MAP1S	4.05934557424137e-10	-0.356073	0.149	0.193	8.98495549402585e-06
TLE4	4.15138151490405e-10	-0.230238	0.441	0.499	9.18866784508862e-06
NUDT16	4.23783020376637e-10	-0.495021	0.102	0.139	9.38001337301648e-06
LINC02435	4.36756751094487e-10	2.71867	0.016	0.002	9.66717392872537e-06
ADAM23	4.48239379010479e-10	-0.447408	0.142	0.184	9.92133041501794e-06
DENND4C	4.55104116482744e-10	0.243202	0.507	0.454	1.00732745142291e-05
MSR1	4.56990257812313e-10	0.255908	0.57	0.519	1.01150223664177e-05
FLOT1	4.846425054789e-10	-0.274505	0.353	0.406	1.072707721627e-05
CRYAB	5.00222656105621e-10	1.08572	0.047	0.023	1.10719282702418e-05
OLFM1	5.02483533907747e-10	-0.464635	0.098	0.134	1.11219705395141e-05
SCARB2	5.05075456799094e-10	0.294158	0.38	0.326	1.11793401607911e-05
LUCAT1	5.25903369666033e-10	2.15489	0.039	0.017	1.1640345184188e-05
PARVG	5.50772211414152e-10	0.313502	0.448	0.402	1.21907921274408e-05
SLC2A1	5.88639726405947e-10	-0.648632	0.035	0.058	1.30289517042692e-05
U2AF1	5.92609809726511e-10	1.04806	0.045	0.022	1.31168255284866e-05
LINGO2	5.928998888075e-10	-0.206567	0.253	0.308	1.31232461388652e-05
CITED2	5.94918769981658e-10	1.37878	0.037	0.016	1.3167932054774e-05
RPL7A	6.45432499998048e-10	-0.395723	0.304	0.351	1.42860029549568e-05
FOSL2	6.45585164072399e-10	1.12719	0.062	0.035	1.42893820215785e-05
ABHD12B	6.51563432372249e-10	-1.04968	0.019	0.036	1.44217050121274e-05
DKK3	6.67151321759761e-10	-0.533638	0.091	0.125	1.47667273558305e-05
DYRK1A	6.73634219002615e-10	0.177246	0.788	0.77	1.49102198034039e-05
RPL13	6.78248581937224e-10	-0.260246	0.508	0.553	1.50123541125985e-05
DNAJA4	6.82642708558906e-10	0.702236	0.107	0.072	1.51096137112428e-05
YARS1	6.8350788446816e-10	-0.326944	0.175	0.221	1.51287635148182e-05
RPS12	6.85970139964423e-10	-0.371247	0.256	0.306	1.51832630779725e-05
MIR142HG	6.95886242938261e-10	-0.434532	0.11	0.148	1.54027461011955e-05
DEF6	7.00615097403403e-10	-0.242779	0.296	0.352	1.55074145659269e-05
SNHG25	7.00806675303744e-10	-0.285044	0.254	0.305	1.55116549511731e-05
SH3BP5	7.53122150052621e-10	1.00829	0.077	0.047	1.66696056692647e-05
ACOT11	7.58060243323725e-10	0.581389	0.118	0.081	1.67789054257273e-05
TRIT1	8.206308845392e-10	-0.389968	0.193	0.237	1.81638439983907e-05
NCOA5	8.48800137218213e-10	-0.281051	0.251	0.303	1.87873422371879e-05
SMURF1	9.07336613782947e-10	-0.205511	0.501	0.553	2.00829886094717e-05
TGFB2	9.36365172453552e-10	-0.651519	0.033	0.056	2.07255067270869e-05
ZNF292	9.71754460808292e-10	-0.135158	0.77	0.805	2.15088132355307e-05
ZNF692	1.00179406115859e-09	-0.442681	0.089	0.124	2.21737097496843e-05
SDK1	1.01378206942224e-09	-0.150801	0.784	0.827	2.24390523245919e-05
TUBB	1.12588415446263e-09	-0.364254	0.171	0.215	2.49203198748758e-05
C1QA	1.17103288460319e-09	-0.249019	0.397	0.446	2.5919641867807e-05
VGLL4	1.21368586864666e-09	-0.225583	0.449	0.499	2.68637230166251e-05
UBXN2B	1.23989453975537e-09	0.337084	0.413	0.365	2.74438257429455e-05
LIMCH1	1.25906302732322e-09	-0.219731	0.226	0.278	2.78681010467722e-05
TREM1	1.29797568816017e-09	1.3837	0.03	0.012	2.87293938817372e-05
POLR1B	1.31204957464891e-09	-0.579858	0.067	0.098	2.9040905285279e-05
CCNL2	1.33616928480862e-09	-0.329646	0.213	0.26	2.9574770949954e-05
LINC01440	1.3470003278964e-09	-1.17911	0.01	0.023	2.98145052576589e-05
POU5F1	1.34863182235218e-09	-0.819074	0.033	0.055	2.98506167559431e-05
SIGLEC11	1.35832232809884e-09	-0.437344	0.128	0.167	3.00651064101397e-05
TAFA2	1.36915910060484e-09	-0.183637	0.328	0.386	3.03049675327875e-05
CBWD5	1.37376826076961e-09	-0.257786	0.291	0.344	3.04069866838745e-05
PRKCA-AS1	1.39644913478574e-09	-0.351428	0.094	0.13	3.09090051493475e-05
SQSTM1	1.42237587296838e-09	0.422182	0.285	0.237	3.14828675722821e-05
SYNCRIP	1.43319503583701e-09	-0.282773	0.27	0.321	3.17223389232164e-05
SRSF2	1.46032642044092e-09	-0.300729	0.24	0.29	3.23228649900394e-05
FADS3	1.46488536134933e-09	-0.513654	0.068	0.099	3.2423772588106e-05
FAM168A	1.54908154333244e-09	-0.121551	0.759	0.812	3.42873708801202e-05
SLC17A7	1.55835391415722e-09	-0.48291	0.088	0.122	3.4492605535956e-05
RERE	1.61143880899759e-09	0.115582	0.952	0.941	3.56675865983527e-05
GRM5	1.61949122277178e-09	-0.20565	0.284	0.339	3.58458187248306e-05
RPS14	1.62973247966832e-09	-0.30152	0.296	0.346	3.60724987049787e-05
RASSF3	1.65566949581354e-09	0.365973	0.385	0.334	3.66465886203368e-05
TRNT1	1.67715413747943e-09	-0.377163	0.154	0.196	3.71221296789696e-05
SLC25A19	1.71041897198607e-09	-0.364712	0.155	0.197	3.78584135259398e-05
PLK3	1.73674397131014e-09	-0.40075	0.142	0.182	3.84410910609786e-05
RASSF4	1.7405160557968e-09	-0.238718	0.488	0.53	3.85245823790063e-05
ASXL2	1.76804002257529e-09	-0.218289	0.503	0.552	3.91337978596815e-05
SMURF2	1.79947967146383e-09	0.211413	0.665	0.631	3.98296830481803e-05
NR4A2	1.84091368328545e-09	0.779391	0.079	0.049	4.07467834658401e-05
SPARCL1	1.91428327091484e-09	-0.235293	0.245	0.298	4.23707459184291e-05
LINC01331	1.91553889312312e-09	-0.704142	0.035	0.057	4.23985378603872e-05
RNF13	1.95877186165467e-09	0.170902	0.768	0.74	4.33554563858644e-05
ITGA6	2.01026892541016e-09	-0.357444	0.159	0.202	4.44952923950284e-05
MEF2C-AS1	2.01326688825646e-09	0.239625	0.576	0.533	4.45616493046685e-05
PTTG1IP	2.02116240069616e-09	-0.115357	0.356	0.414	4.47364085770089e-05
WWC2	2.05991961774056e-09	-0.206916	0.482	0.532	4.55942608190696e-05
LINC03002	2.06819348274196e-09	0.462935	0.213	0.169	4.57773945470106e-05
LRRTM4	2.10640659474421e-09	-0.125059	0.542	0.607	4.66232035680684e-05
USP10	2.13044617120915e-09	-0.2421	0.412	0.465	4.71552955535433e-05
LINC02246	2.15532961154082e-09	0.529234	0.158	0.118	4.77060656218446e-05
SH3BP2	2.17024374800174e-09	-0.261487	0.3	0.351	4.80361751182704e-05
FTH1	2.24066301432371e-09	0.565101	0.6	0.579	4.9594835159041e-05
DRAM2	2.25403559953336e-09	-0.229835	0.36	0.415	4.98908239600715e-05
NAMPT	2.26765017877056e-09	0.989091	0.245	0.207	5.01921690569076e-05
ZEB2	2.27169910514801e-09	0.145656	0.968	0.96	5.02817879933461e-05
ADGRL3	2.2722007199563e-09	-0.1626	0.437	0.496	5.02928907355128e-05
ADCY7	2.28096742449282e-09	0.222827	0.562	0.521	5.0486932973724e-05
IL1RAP	2.33280400256029e-09	-0.209534	0.456	0.507	5.16342837926695e-05
HS6ST3	2.35341707862149e-09	-0.18042	0.296	0.353	5.2090533618208e-05
UBE2D2	2.44316028351075e-09	-0.218288	0.477	0.527	5.40769097152269e-05
ARL15	2.53878610747145e-09	0.149847	0.85	0.832	5.61934917027732e-05
SGCD	2.58175284758059e-09	-0.316424	0.132	0.172	5.71445175283488e-05
CPT1A	2.63188115545155e-09	-0.452187	0.12	0.158	5.82540574947647e-05
EGR3	2.6475946032626e-09	1.6885	0.028	0.011	5.86018589486144e-05
MCF2L	2.68472162222096e-09	-0.162682	0.699	0.742	5.94236283862388e-05
MYO1G	2.73664174545523e-09	-0.445753	0.079	0.111	6.05728283939061e-05
METRNL	2.86035785001402e-09	0.967574	0.045	0.023	6.33111606522104e-05
SYAP1	2.94522712638198e-09	0.597572	0.153	0.114	6.51896572153388e-05
TNFRSF25	2.99894151162118e-09	-0.444863	0.104	0.14	6.63785714182233e-05
CHRM3	3.05101175529335e-09	-0.218475	0.253	0.306	6.7531094191663e-05
EIF2S2	3.06801910180963e-09	-0.309434	0.209	0.256	6.79075347994543e-05
ERCC1	3.06835038119861e-09	-0.335587	0.169	0.213	6.791486733745e-05
LINC01478	3.12307290569984e-09	-1.72843	0.005	0.014	6.91260956947602e-05
ADORA1	3.21510905252849e-09	-0.719153	0.042	0.066	7.11632237686656e-05
TPM3	3.24657508180168e-09	-0.23008	0.388	0.441	7.18596928605983e-05
LINC02207	3.26556727713038e-09	1.09388	0.036	0.016	7.22800661120039e-05
XRN2	3.32191768428412e-09	-0.192857	0.504	0.555	7.35273260239448e-05
APRG1	3.34208539957667e-09	-0.517169	0.082	0.114	7.397371823423e-05
GPATCH11	3.36662702839138e-09	-0.422637	0.135	0.174	7.45169226464149e-05
TRIP12	3.3672955970356e-09	-0.15162	0.687	0.731	7.4531720744786e-05
ACTR2	3.49305521365033e-09	-0.167582	0.621	0.669	7.73152840989365e-05
GDI2	3.58167080920417e-09	-0.233188	0.408	0.461	7.9276701690925e-05
POTEG	3.58413175262522e-09	-0.998418	0.013	0.027	7.93311722126066e-05
NAA16	3.60929539557245e-09	0.351307	0.327	0.281	7.98881442856005e-05
RUNX3	3.69228178542536e-09	0.906245	0.056	0.031	8.17249650386049e-05
LTBP2	3.75802740002695e-09	0.779061	0.059	0.034	8.31801784721965e-05
HDHD5	3.77083429830516e-09	-0.350377	0.164	0.206	8.34636463586865e-05
LINC01963	3.80010042940488e-09	-1.37327	0.007	0.018	8.41114229044476e-05
SIGLEC1	3.86367031204336e-09	1.30811	0.035	0.016	8.55184786867678e-05
ARMCX4	3.89554130409497e-09	-0.230886	0.274	0.325	8.62239112248381e-05
UMAD1	3.90811962117194e-09	0.220564	0.52	0.471	8.65023196950197e-05
EGLN1	3.93033339920698e-09	-0.238201	0.359	0.412	8.69939994580474e-05
C12orf75	4.00411801727342e-09	-0.251909	0.304	0.356	8.86271481943298e-05
ZFPM2	4.34643322122072e-09	-0.338865	0.179	0.222	9.62039529184993e-05
MAN2A1	4.42043725775283e-09	0.303798	0.662	0.644	9.78419582631011e-05
MAMDC2	4.45752629103014e-09	0.528379	0.134	0.097	9.86628869256612e-05
MANBA	4.47685022169081e-09	0.17964	0.75	0.724	9.90906028069044e-05
SLC26A3	4.5263736894086e-09	-0.890845	0.021	0.039	0.000100187
CREBRF	4.81615602393475e-09	0.258033	0.394	0.344	0.000106601
PDE7A	4.84025140003052e-09	0.258808	0.398	0.347	0.000107134
RPL14	4.89659723397945e-09	-0.283021	0.237	0.285	0.000108381
ARHGAP25	4.98969315673157e-09	-0.134743	0.742	0.791	0.000110442
ITGB2-AS1	5.02598991475163e-09	-0.358373	0.131	0.17	0.000111245
SLC2A3	5.08813009902436e-09	0.236793	0.267	0.326	0.000112621
UBE2B	5.089131883673e-09	0.277497	0.36	0.31	0.000112643
RAB10	5.2119699973752e-09	-0.141119	0.769	0.81	0.000115362
SGPP1	5.3643271290438e-09	0.286033	0.376	0.325	0.000118734
XBP1	5.44527102851388e-09	-0.357014	0.167	0.208	0.000120526
PHACTR1	5.68567402133907e-09	-0.167847	0.541	0.598	0.000125847
PDZD2	5.69083422164675e-09	-0.211735	0.258	0.308	0.000125961
SNCA	5.85870108327453e-09	-0.158392	0.472	0.534	0.000129676
NFKBIZ	5.90854113400243e-09	-0.330193	0.202	0.246	0.00013078
OVCH1-AS1	6.13005344034009e-09	-0.823926	0.033	0.054	0.000135683
PAICS	6.29748236110127e-09	-0.490636	0.084	0.116	0.000139388
TMIGD2	6.52944470136697e-09	-0.659273	0.047	0.071	0.000144523
LINC02245	6.53999918806131e-09	0.273299	0.378	0.328	0.000144756
LGALS3	6.78553805320838e-09	1.64315	0.029	0.012	0.000150191
EEF1A1	6.80596167080548e-09	-0.146385	0.513	0.569	0.000150643
LARS1	6.90390619248895e-09	-0.223268	0.322	0.376	0.000152811
MXD4	6.92187864947904e-09	0.348553	0.311	0.264	0.000153209
ATG16L1	7.06571419422428e-09	-0.370257	0.133	0.172	0.000156393
CCL3	7.08146737947408e-09	2.21167	0.02	0.006	0.000156741
TEX14	7.43425201895603e-09	1.12715	0.048	0.026	0.00016455
EMP2	7.60521085102828e-09	1.16843	0.042	0.021	0.000168334
KCNH1	7.61974918843281e-09	-0.328225	0.16	0.201	0.000168656
PDE1A	7.66104592545396e-09	-0.253152	0.218	0.266	0.00016957
LINC00621	7.91924857651719e-09	-0.830783	0.04	0.062	0.000175285
NUMB	8.27735770086584e-09	-0.109426	0.874	0.899	0.000183211
ANKS1B	8.29378381750601e-09	-0.11225	0.514	0.577	0.000183575
HIVEP1	8.62349184454218e-09	0.594804	0.159	0.121	0.000190872
NTRK2	8.63506618663807e-09	-0.246139	0.227	0.275	0.000191129
NTRK3	8.78733919930737e-09	-0.289781	0.171	0.213	0.000194499
SLC25A37	9.24026839969557e-09	-0.11138	0.752	0.793	0.000204524
RASAL3	9.28140113500244e-09	-0.300178	0.192	0.237	0.000205435
ABI3	9.36062647266173e-09	-0.283177	0.245	0.291	0.000207188
CCT4	9.36523002279244e-09	0.366088	0.249	0.204	0.00020729
CLEC19A	9.60972878379049e-09	-0.483474	0.091	0.123	0.000212702
RASA1	9.64278485300661e-09	0.184398	0.777	0.762	0.000213433
TAMALIN	9.76368395789483e-09	1.00167	0.052	0.029	0.000216109
PLP1	9.80070080491216e-09	0.565467	0.14	0.103	0.000216929
KCTD16	9.83130205388844e-09	-0.248311	0.218	0.266	0.000217606
OGA	1.00954471946468e-08	0.235617	0.514	0.467	0.000223453
GLIPR2	1.01169596005432e-08	-0.601975	0.065	0.093	0.000223929
SYNPR	1.02385003093896e-08	-0.545275	0.093	0.125	0.000226619
ABLIM1	1.02465846821585e-08	-0.315161	0.137	0.175	0.000226798
SLC5A3	1.05313548490912e-08	0.566253	0.168	0.131	0.000233101
SH3GL1	1.06105142016735e-08	-0.277144	0.236	0.283	0.000234853
PTMA	1.09537372814324e-08	-0.215542	0.392	0.444	0.00024245
CKMT2-AS1	1.1087677007059e-08	0.379454	0.193	0.151	0.000245415
MIR3142HG	1.11343925573556e-08	0.79999	0.088	0.058	0.000246449
SWAP70	1.15908005180548e-08	0.250783	0.54	0.501	0.000256551
XAF1	1.16615549514723e-08	0.314316	0.361	0.315	0.000258117
SERPING1	1.20901687815915e-08	-0.48222	0.074	0.104	0.000267604
DDX42	1.2233895508605e-08	-0.309097	0.249	0.295	0.000270785
SEMA4D	1.24079031378544e-08	-0.207918	0.446	0.498	0.000274637
ZDHHC21	1.24180130772936e-08	0.207251	0.523	0.475	0.00027486
SETX	1.24589872447193e-08	-0.137967	0.787	0.819	0.000275767
ZNF710	1.25889902512906e-08	0.163405	0.794	0.781	0.000278645
SPSB1	1.27979877704358e-08	-0.694729	0.034	0.055	0.000283271
CPNE8	1.28419073181373e-08	0.416079	0.18	0.14	0.000284243
SNHG3	1.30099920598639e-08	-0.435396	0.107	0.141	0.000287963
SCFD2	1.31001267747619e-08	-0.181037	0.554	0.607	0.000289958
MGAT1	1.36351427319528e-08	0.3664	0.408	0.365	0.0003018
PDZRN3	1.37024472661523e-08	-0.312943	0.117	0.153	0.00030329
SCIMP	1.3913788535047e-08	0.456184	0.152	0.114	0.000307968
MARCHF2	1.41011631332222e-08	-0.322094	0.213	0.256	0.000312115
FKBP15	1.45801772937712e-08	-0.202693	0.439	0.489	0.000322718
PLVAP	1.47444360026632e-08	-0.455285	0.073	0.102	0.000326353
KPNB1	1.49224215465603e-08	-0.235747	0.383	0.432	0.000330293
MORC1	1.53217290838242e-08	-0.468245	0.129	0.165	0.000339131
ROBO2	1.57658656074002e-08	-0.14627	0.468	0.53	0.000348962
RPS23	1.57684973071779e-08	-0.29735	0.266	0.313	0.00034902
MEF2D	1.61385562833359e-08	0.369149	0.235	0.191	0.000357211
S100A9	1.70970815207221e-08	1.10132	0.046	0.025	0.000378427
MIAT	1.740975863637e-08	-0.226231	0.202	0.248	0.000385348
TPI1	1.74742585940593e-08	-0.369061	0.118	0.154	0.000386775
IRF2BPL	1.76533551205742e-08	-0.498964	0.081	0.111	0.000390739
LPAR5	1.80979977842228e-08	0.287432	0.35	0.304	0.000400581
PTPN1	1.82746998872342e-08	-0.222574	0.328	0.38	0.000404492
CPSF1	1.84280724781488e-08	-0.507038	0.066	0.094	0.000407887
PTGS1	1.85325696114547e-08	-0.264994	0.24	0.286	0.0004102
ATM	1.85736009409612e-08	0.110391	0.917	0.9	0.000411108
RCC1	1.85918946855348e-08	-0.418717	0.095	0.127	0.000411513
CCR5AS	1.90784122294908e-08	-0.575649	0.071	0.1	0.000422282
HNRNPAB	1.92638454957279e-08	-0.440633	0.097	0.13	0.000426386
GRPEL1	1.93176121921164e-08	-0.620535	0.05	0.074	0.000427576
CACYBP	1.97534458886588e-08	0.608975	0.128	0.094	0.000437223
CSK	1.9951580958691e-08	-0.269089	0.232	0.278	0.000441608
RNASE1	2.06933997521591e-08	0.846287	0.06	0.036	0.000458028
RNF217-AS1	2.07986807033363e-08	-0.501211	0.071	0.1	0.000460358
DSE	2.09432221043274e-08	-0.152575	0.453	0.507	0.000463557
PTPN22	2.13737029707227e-08	1.10626	0.042	0.022	0.000473086
LAIR1	2.19054088404394e-08	-0.21082	0.397	0.446	0.000484854
FCAR	2.22240121841811e-08	0.894073	0.05	0.028	0.000491906
EHD4	2.23372434812884e-08	-0.247077	0.261	0.308	0.000494413
VKORC1L1	2.27224133373093e-08	-0.261251	0.279	0.327	0.000502938
CTTNBP2	2.324963611888e-08	-0.131537	0.744	0.79	0.000514607
PRKACA	2.44885442178006e-08	-0.327578	0.203	0.245	0.000542029
HIP1	2.5107732408116e-08	0.522874	0.159	0.122	0.000555735
SHISA5	2.53394524718517e-08	-0.425111	0.098	0.13	0.000560863
LAT2	2.60534429160019e-08	-0.163872	0.514	0.563	0.000576667
MFSD1	2.62258439350181e-08	0.230407	0.468	0.419	0.000580483
TLE3	2.63186282381905e-08	-0.206281	0.301	0.35	0.000582537
FPR3	2.71318884453279e-08	0.44081	0.163	0.125	0.000600537
ABRAXAS1	2.73764705053769e-08	-0.53863	0.079	0.108	0.000605951
LINC02328	2.80067745895876e-08	0.345258	0.291	0.245	0.000619902
APOE	2.97052078795267e-08	0.170979	0.645	0.602	0.000657495
CD44	2.98473523389713e-08	1.23356	0.034	0.016	0.000660641
SNAP23	2.99593020955323e-08	0.313998	0.405	0.362	0.000663119
RGL3	3.03617431487912e-08	0.407078	0.208	0.167	0.000672027
PFKFB3	3.06681136442617e-08	-0.147826	0.647	0.699	0.000678808
GPNMB	3.10013275832874e-08	0.685281	0.115	0.083	0.000686183
METTL7A	3.1735782523274e-08	-0.284216	0.284	0.33	0.00070244
IER5	3.18725339558554e-08	0.751386	0.076	0.049	0.000705467
HMG20B	3.289784385677e-08	-0.601554	0.046	0.07	0.000728161
GAD1	3.40310005488126e-08	-0.742097	0.032	0.052	0.000753242
MDN1	3.43325572130569e-08	-0.296404	0.296	0.341	0.000759917
N4BP2L2	3.59058906122157e-08	0.131062	0.867	0.85	0.000794741
CHD7	3.68174430082964e-08	-0.113736	0.786	0.824	0.000814917
CLEC4E	3.72394598055761e-08	2.78271	0.012	0.001	0.000824258
MYO7A	3.77613412091421e-08	-0.346986	0.152	0.19	0.00083581
PGM1	3.91335518538817e-08	-0.46331	0.094	0.125	0.000866182
FOXP1-IT1	3.93841528191855e-08	0.891742	0.046	0.025	0.000871729
TLR4	4.01613641189233e-08	0.366708	0.286	0.244	0.000888932
MACROD2	4.04613335119527e-08	-0.183297	0.514	0.57	0.000895571
NEGR1	4.04907503506475e-08	-0.155804	0.433	0.491	0.000896222
NFX1	4.05700422676085e-08	-0.194946	0.441	0.491	0.000897977
ABCA13	4.11591017141498e-08	-1.45078	0.006	0.015	0.000911016
SLC8A1-AS1	4.13228965415351e-08	0.497033	0.295	0.257	0.000914641
PDIA5	4.20226322645919e-08	-0.394118	0.134	0.17	0.000930129
DENND2D	4.25953557994339e-08	-0.521571	0.064	0.091	0.000942806
OCRL	4.39039202545322e-08	-0.320847	0.159	0.199	0.000971769
RPL37	4.45193560047854e-08	-0.182352	0.345	0.395	0.000985391
ASXL1	4.47788533465922e-08	-0.187275	0.425	0.476	0.000991135
C5orf15	4.61362410898882e-08	-0.367149	0.185	0.224	0.00102118
NFKBID	4.61850934218794e-08	0.665558	0.136	0.103	0.00102226
LINC01098	4.64316258273806e-08	-0.998307	0.008	0.019	0.00102772
MGMT	4.69986291606164e-08	0.314955	0.361	0.317	0.00104027
SNHG12	4.76028444768521e-08	-0.319401	0.103	0.136	0.00105364
IMPA2	4.77623661664266e-08	-0.370803	0.164	0.203	0.00105717
LINC01446	4.84543783714678e-08	-0.96068	0.01	0.022	0.00107249
GARNL3	4.89692909845182e-08	-0.156591	0.415	0.473	0.00108389
FNDC3B	4.9439361979345e-08	0.20433	0.697	0.673	0.00109429
DPP7	4.97017432942881e-08	-0.271957	0.181	0.223	0.0011001
SSTR2	4.97457220063036e-08	-0.78156	0.022	0.039	0.00110107
TMSB10	5.27058137552823e-08	-0.249536	0.312	0.357	0.00116659
MIRLET7BHG	5.2836935726238e-08	0.317387	0.342	0.3	0.00116949
AAR2	5.37662337121371e-08	-0.527538	0.058	0.083	0.00119006
ARFGAP3	5.40188724072086e-08	-0.292789	0.232	0.276	0.00119565
C1orf54	5.44265686833706e-08	-0.391328	0.097	0.129	0.00120468
NPC1	5.49043267067712e-08	-0.230166	0.401	0.449	0.00121525
GPR135	5.55577012665414e-08	-0.472773	0.101	0.133	0.00122971
RGS7	5.68496884283621e-08	-0.201598	0.31	0.36	0.00125831
SNRPD1	5.87553573105405e-08	-0.466141	0.079	0.108	0.00130049
SLC1A3	6.0760174194455e-08	-0.120444	0.993	0.996	0.00134487
LPCAT1	6.11938440489819e-08	0.458002	0.212	0.173	0.00135446
LINC00970	6.22263485404666e-08	-0.522956	0.036	0.056	0.00137732
RORA	6.25659413148948e-08	-0.219113	0.331	0.382	0.00138483
FPR1	6.2824856149026e-08	-0.265195	0.189	0.23	0.00139057
COPG2IT1	6.32429264803876e-08	-0.3181	0.117	0.152	0.00139982
SNX30	6.34464202747738e-08	0.265021	0.405	0.362	0.00140432
HK1	6.37882616530218e-08	-0.194815	0.415	0.467	0.00141189
ZNF529-AS1	6.65077227106634e-08	-0.508019	0.068	0.095	0.00147208
RPL36	6.68491335052852e-08	-0.250828	0.224	0.269	0.00147964
MTHFD2	6.75141900306392e-08	-0.231621	0.219	0.264	0.00149436
KCTD12	6.95548658291422e-08	-0.195878	0.478	0.52	0.00153953
MYO1D	7.08284017714415e-08	0.484711	0.171	0.135	0.00156772
SF1	7.11796756128653e-08	-0.185289	0.442	0.493	0.00157549
SLC20A2	7.11936237705214e-08	-0.243213	0.346	0.392	0.0015758
TMEM121B	7.13335400191149e-08	-0.529222	0.06	0.085	0.0015789
ADARB1	7.15649541556198e-08	0.53468	0.172	0.136	0.00158402
HSPA4	7.2156009786805e-08	0.346842	0.271	0.229	0.0015971
IMMT	7.57236900181143e-08	-0.238425	0.265	0.311	0.00167607
MAP4	7.63557173566782e-08	-0.197936	0.468	0.518	0.00169006
DSC2	7.8996922574806e-08	-0.344876	0.151	0.188	0.00174852
FKBP1A	7.96710280660048e-08	-0.250739	0.223	0.266	0.00176344
MPP3	8.25181526331884e-08	-1.50892	0.005	0.013	0.00182646
ATPSCKMT	8.27814266409239e-08	0.45956	0.139	0.105	0.00183228
KAZN	8.28754496647548e-08	-0.151222	0.382	0.437	0.00183437
LRRC8D	8.38816900497569e-08	-0.155691	0.554	0.603	0.00185664
TIMM17A	8.47631833356269e-08	-0.516164	0.082	0.111	0.00187615
MYD88	8.57148089924451e-08	-0.682952	0.038	0.058	0.00189721
CEP85L	8.63687757502909e-08	0.210108	0.438	0.39	0.00191169
PER3	8.64298480116353e-08	0.410478	0.191	0.153	0.00191304
SH2B2	8.69183520970575e-08	-0.457556	0.105	0.136	0.00192385
AGAP1	8.78947923859721e-08	-0.165479	0.374	0.428	0.00194546
C6orf62	8.86764776135176e-08	0.218006	0.562	0.529	0.00196277
RPL18A	9.14903226934507e-08	-0.312839	0.23	0.272	0.00202505
METAP1	9.41984779765845e-08	-0.302011	0.177	0.217	0.00208499
CDHR3	9.46337045138654e-08	-0.397346	0.091	0.122	0.00209462
THSD7A	9.46901354235739e-08	-0.317396	0.075	0.103	0.00209587
DLEU2	9.63555053608025e-08	0.141714	0.887	0.879	0.00213273
CDK6	9.75622659829264e-08	-0.116171	0.609	0.667	0.00215944
WSB1	9.86633844611226e-08	0.186664	0.771	0.761	0.00218382
RGL1	1.03395360419376e-07	-0.283576	0.446	0.488	0.00228855
LINC00996	1.03983277224226e-07	1.10472	0.035	0.017	0.00230157
CCDC92	1.05030852615842e-07	-0.293968	0.209	0.25	0.00232475
MAST3	1.06572425452593e-07	-0.222013	0.299	0.347	0.00235887
TRIO	1.06737192844014e-07	0.114984	0.923	0.92	0.00236252
TTTY10	1.07006552828935e-07	-0.590253	0.039	0.06	0.00236848
RPL9	1.07308154585038e-07	-0.241881	0.266	0.311	0.00237516
DMXL2	1.076319585366e-07	0.274373	0.451	0.41	0.00238233
GALNT15	1.09174513960857e-07	-0.97084	0.015	0.028	0.00241647
PLAUR	1.09379675957729e-07	0.450591	0.203	0.165	0.00242101
ANK3	1.09766267405514e-07	-0.151061	0.339	0.393	0.00242957
RAB12	1.11994426116762e-07	-0.199371	0.406	0.452	0.00247888
CZIB	1.12435153080155e-07	-0.488428	0.062	0.088	0.00248864
RAP1GAP2	1.12930739731723e-07	-0.151773	0.45	0.504	0.00249961
CISH	1.14562083146992e-07	-0.846725	0.017	0.031	0.00253572
CNKSR2	1.15172257810573e-07	-0.225651	0.195	0.237	0.00254922
SIRPB2	1.15524823472633e-07	-0.227757	0.328	0.374	0.00255703
DPP6	1.18815018193442e-07	-0.137797	0.274	0.324	0.00262985
MT2A	1.18898214489279e-07	0.838838	0.11	0.079	0.00263169
IL13RA1	1.19277192325774e-07	-0.122811	0.624	0.675	0.00264008
TTC17	1.24965194016524e-07	-0.117233	0.768	0.808	0.00276598
NR3C2	1.26634484382832e-07	0.298127	0.335	0.293	0.00280293
RICTOR	1.28888174802416e-07	0.16534	0.643	0.601	0.00285281
ZNF100	1.3036726454365e-07	0.317473	0.282	0.24	0.00288555
POLR2B	1.31165453652613e-07	-0.278238	0.237	0.279	0.00290322
SALL1	1.31168872459976e-07	-0.287785	0.169	0.208	0.00290329
RHOQ-AS1	1.31987435129447e-07	0.561982	0.155	0.122	0.00292141
CAP1	1.34115262004615e-07	-0.210278	0.364	0.412	0.00296851
DOCK4-AS1	1.34629103938415e-07	0.698809	0.106	0.076	0.00297988
LIPC	1.35428831131868e-07	-0.30845	0.176	0.215	0.00299758
RPLP0	1.36226981620798e-07	-0.284801	0.223	0.264	0.00301525
SACM1L	1.37122626881484e-07	-0.224887	0.345	0.39	0.00303507
SPIN1	1.3843102939936e-07	0.229969	0.536	0.505	0.00306403
PMM2	1.40030657272798e-07	-0.301757	0.262	0.303	0.00309944
TMCO1	1.4070531515297e-07	-0.351768	0.136	0.171	0.00311437
GFPT1	1.42781433074865e-07	-0.276266	0.23	0.272	0.00316032
MLLT1	1.4441232888156e-07	-0.328556	0.158	0.196	0.00319642
TTC7B	1.48728607356143e-07	0.22968	0.437	0.394	0.00329196
TSPAN3	1.53754866512447e-07	-0.297525	0.223	0.265	0.00340321
DNAAF9	1.55171210010278e-07	0.164857	0.723	0.697	0.00343456
TPM4	1.56575797273982e-07	-0.234626	0.215	0.257	0.00346565
ODF3B	1.57373330570513e-07	0.68065	0.057	0.035	0.0034833
RAP1A	1.598573620435e-07	-0.116859	0.874	0.902	0.00353828
CYSLTR2	1.65285859901918e-07	2.2089	0.012	0.002	0.00365844
ZFPM1-AS1	1.6584721817547e-07	-1.067	0.011	0.022	0.00367086
SNHG5	1.67581776220015e-07	-0.296605	0.209	0.249	0.00370926
FSTL5	1.70229524959159e-07	-0.305758	0.11	0.143	0.00376786
AFAP1	1.73016271879739e-07	-0.311187	0.11	0.142	0.00382954
ITPKB	1.7313615196988e-07	0.244055	0.342	0.297	0.0038322
TLN1	1.73339961703229e-07	-0.233268	0.254	0.299	0.00383671
CDK2AP1	1.73978197059871e-07	-0.418233	0.102	0.133	0.00385083
TBC1D2	1.7485151944997e-07	0.736839	0.076	0.051	0.00387016
THUMPD2	1.77665896961205e-07	-0.223153	0.248	0.293	0.00393246
RRP15	1.7954843796283e-07	-0.320863	0.145	0.181	0.00397413
RABGGTB	1.79909088650504e-07	-0.32619	0.16	0.197	0.00398211
FRG1-DT	1.83830238619179e-07	-0.422482	0.12	0.153	0.0040689
NUCKS1	1.85396213963334e-07	-0.183763	0.383	0.433	0.00410356
SMARCA1	1.89269508946615e-07	-0.231903	0.23	0.274	0.00418929
TNS3	1.94033324272438e-07	-0.106163	0.826	0.857	0.00429473
BCL2L11	1.97059040718433e-07	0.484022	0.135	0.102	0.0043617
PARVB	1.97382898939485e-07	0.290221	0.294	0.251	0.00436887
LYST	1.97647166608019e-07	-0.120372	0.78	0.814	0.00437472
WIPF3	1.9842366341633e-07	0.604389	0.145	0.113	0.00439191
CSKMT	2.00382601795474e-07	-0.498848	0.058	0.082	0.00443527
ERICH1	2.06367833160209e-07	-0.18765	0.5	0.545	0.00456775
RPS24	2.09512686703024e-07	-0.215734	0.395	0.44	0.00463735
RANBP9	2.10253029384453e-07	-0.162561	0.562	0.605	0.00465374
CLK1	2.11399179523318e-07	0.301434	0.415	0.376	0.00467911
TRPM2	2.12272888973872e-07	-0.119877	0.686	0.731	0.00469845
HIPK3	2.16834084005433e-07	-0.171739	0.527	0.568	0.00479941
NEFL	2.17245692017232e-07	-0.427216	0.069	0.096	0.00480852
RBFOX3	2.20870314617327e-07	-0.297979	0.125	0.159	0.00488874
STX11	2.26437101460608e-07	0.548556	0.093	0.065	0.00501196
UBE2G2	2.26469454439875e-07	-0.197007	0.42	0.468	0.00501267
MRPS6	2.280309712943e-07	0.395703	0.187	0.15	0.00504724
EIF1AY	2.33730648249509e-07	-0.916071	0.019	0.033	0.00517339
SNHG6	2.36487892851404e-07	-0.366348	0.173	0.209	0.00523442
LINC02301	2.36946767772648e-07	-1.82373	0.004	0.011	0.00524458
PPFIA2	2.40845601143426e-07	-0.176102	0.283	0.331	0.00533088
SPOPL-DT	2.41453460878015e-07	0.367939	0.196	0.158	0.00534433
SEMA6B	2.44026315714003e-07	-0.362899	0.112	0.144	0.00540128
BZW2	2.4753766940496e-07	-0.394906	0.109	0.14	0.005479
COL14A1	2.55851441224589e-07	-0.676507	0.034	0.053	0.00566302
NELL2	2.56916324984734e-07	-0.262749	0.242	0.284	0.00568659
LRRC8C-DT	2.62056589477368e-07	-0.436163	0.112	0.144	0.00580036
HUWE1	2.66338432594916e-07	-0.16847	0.475	0.521	0.00589513
TKT	2.6659889690143e-07	-0.293764	0.173	0.211	0.0059009
SEH1L	2.69243849634116e-07	-0.390268	0.127	0.16	0.00595944
ATG4C	2.70914058138557e-07	0.219884	0.465	0.425	0.00599641
FGF13	2.71371412242802e-07	-0.713849	0.054	0.077	0.00600653
ADAMTS9-AS2	2.73832973245563e-07	-0.477784	0.053	0.077	0.00606102
CFAP100	2.75189001147236e-07	-0.893904	0.014	0.027	0.00609103
TP53I11	2.75785428864036e-07	-0.349923	0.109	0.141	0.00610423
MAP2K1	2.76053058903338e-07	-0.175809	0.525	0.566	0.00611016
SNHG29	2.77490441862707e-07	-0.314481	0.179	0.217	0.00614197
ERCC3	2.82142779005283e-07	-0.280648	0.207	0.246	0.00624495
DPYS	2.8440628377029e-07	-0.859218	0.014	0.027	0.00629505
SMAP1	2.88533113422742e-07	-0.160321	0.422	0.47	0.00638639
ZBTB16	2.89588231359143e-07	0.271738	0.604	0.592	0.00640975
NIPAL2	2.91055863549751e-07	-0.335062	0.213	0.25	0.00644223
TRPS1	2.94955375852472e-07	0.241936	0.608	0.576	0.00652854
CDH13	2.97409291147879e-07	-0.580102	0.172	0.207	0.00658286
DHX33	2.97424548770965e-07	-0.529514	0.07	0.096	0.00658319
GRIN2B	3.01468364064464e-07	-0.204475	0.198	0.239	0.0066727
KCNE1	3.02361057857138e-07	1.77461	0.022	0.009	0.00669246
TM9SF3	3.04704893798773e-07	-0.185038	0.415	0.462	0.00674434
LYVE1	3.08149858801938e-07	0.480726	0.213	0.176	0.00682059
LINC01128	3.09116016502211e-07	-0.39108	0.099	0.129	0.00684197
TMED9	3.10511116014401e-07	-0.277469	0.157	0.194	0.00687285
NDST1	3.14264754099221e-07	-0.350246	0.119	0.151	0.00695594
SH3PXD2A	3.16543803170446e-07	0.395147	0.201	0.163	0.00700638
ADAMTS10	3.17121462732964e-07	-0.287561	0.197	0.236	0.00701917
ACVR1B	3.21983306259648e-07	-0.366348	0.164	0.199	0.00712678
EIF3J	3.23180141058288e-07	-0.328587	0.216	0.254	0.00715327
TMEM150B	3.29950166284364e-07	1.27883	0.022	0.009	0.00730312
KIZ	3.32719671892882e-07	0.330008	0.213	0.174	0.00736442
MOB1A	3.34899734154328e-07	-0.173383	0.362	0.411	0.00741267
ATP5MC2	3.37530885515426e-07	-0.281531	0.204	0.244	0.00747091
SNHG19	3.41978054501778e-07	-0.496957	0.055	0.079	0.00756934
RGS6	3.42725203172934e-07	-0.235924	0.2	0.241	0.00758588
TNFRSF13C	3.47801446128169e-07	-0.358201	0.098	0.128	0.00769824
PSME4	3.48711596167609e-07	0.207745	0.546	0.509	0.00771838
WNK1	3.51876512404309e-07	-0.124183	0.736	0.78	0.00778843
SUPT6H	3.52501104469921e-07	-0.269489	0.226	0.266	0.00780226
POLR2H	3.67180736097448e-07	-0.447964	0.082	0.109	0.00812718
CTPS1	3.85300267615686e-07	-0.436821	0.094	0.123	0.00852824
P3H2	3.89281085527015e-07	0.319988	0.361	0.322	0.00861635
TNFRSF10C	3.92374204870123e-07	-0.679179	0.043	0.063	0.00868481
XXYLT1	3.92434027056854e-07	-0.271007	0.228	0.27	0.00868613
ZNF200	3.94569710435049e-07	-0.660232	0.037	0.056	0.00873341
LINC01854	4.01344946073383e-07	-0.82185	0.016	0.029	0.00888337
LARP4B	4.02704172951534e-07	-0.139084	0.658	0.698	0.00891345
NPIPB15	4.10555699466622e-07	-0.704313	0.031	0.048	0.00908724
MTFR1L	4.22438179272118e-07	-0.536884	0.063	0.087	0.00935025
CNTN1	4.23529261756982e-07	-0.16836	0.29	0.337	0.0093744
ZDHHC3	4.27179059457109e-07	-0.250518	0.223	0.263	0.00945518
CAPRIN1	4.32215386195989e-07	-0.230376	0.305	0.346	0.00956666
MAP1A	4.33033918606872e-07	-0.514597	0.067	0.092	0.00958477
MAPRE2	4.49359949398781e-07	0.28063	0.396	0.356	0.00994613
BCORL1	4.58960947773784e-07	-0.421439	0.088	0.116	0.0101586
SPNS3	4.60251122047297e-07	-0.424493	0.095	0.124	0.0101872
EBI3	4.62602543268626e-07	-0.223265	0.232	0.273	0.0102392
LINC02109	4.63434204520233e-07	4.39505	0.01	0.001	0.0102577
CCDC47	4.69298369029674e-07	-0.257675	0.182	0.22	0.0103875
RAB1A	4.86432460061434e-07	0.140612	0.779	0.76	0.0107667
LINC01435	4.87794339315053e-07	-0.745962	0.016	0.029	0.0107968
EIF2S1	4.91645768921963e-07	-0.36569	0.144	0.178	0.0108821
RRP12	4.93663912159932e-07	-0.466168	0.073	0.099	0.0109268
IQSEC2	5.01574227012618e-07	-0.302768	0.201	0.24	0.0111018
NIPBL	5.02276029970842e-07	0.114397	0.907	0.898	0.0111174
LRRC69	5.07217714437073e-07	-0.302027	0.223	0.261	0.0112268
NR3C1	5.07363949424254e-07	0.173498	0.616	0.582	0.01123
SLC6A6	5.09890812714789e-07	-0.269347	0.236	0.276	0.0112859
GTPBP4	5.30927977220256e-07	-0.298485	0.15	0.185	0.0117516
EIF5B	5.35996167078249e-07	-0.272354	0.228	0.268	0.0118637
RPSA	5.37655359362489e-07	-0.223838	0.269	0.31	0.0119005
GABPB1-AS1	5.42044925928971e-07	-0.206329	0.255	0.299	0.0119976
ATP2A3	5.44095006893228e-07	-0.61002	0.034	0.052	0.012043
CST3	5.54093717080569e-07	-0.262121	0.356	0.395	0.0122643
CD69	5.60417604627317e-07	0.738843	0.085	0.059	0.0124043
METTL17	5.60999834131847e-07	-0.386366	0.099	0.128	0.0124172
NPAS1	5.61734778953347e-07	-0.81893	0.015	0.028	0.0124334
SCML4	5.71094548470704e-07	-1.32633	0.008	0.017	0.0126406
RHOQ	5.75807618423198e-07	0.224399	0.508	0.472	0.0127449
NCF4	5.76131085922185e-07	-0.3566	0.12	0.152	0.0127521
TFEB	5.89814365004104e-07	-0.196477	0.325	0.369	0.013055
ABCC6	5.92339018134994e-07	1.24834	0.026	0.012	0.0131108
KATNAL2	6.00806854366765e-07	0.560751	0.131	0.101	0.0132983
EED	6.07558167281356e-07	-0.233728	0.263	0.306	0.0134477
NCALD	6.12340292195814e-07	-0.352448	0.105	0.135	0.0135535
ESRRA	6.2039642937495e-07	-0.327009	0.165	0.201	0.0137319
DR1	6.44512915068676e-07	-0.296208	0.195	0.233	0.0142656
FAM228B	6.48977946501523e-07	-0.191193	0.328	0.371	0.0143645
LCP1	6.50502137635032e-07	-0.154629	0.392	0.441	0.0143982
RMC1	6.56200418821284e-07	-0.268498	0.158	0.194	0.0145243
NAA25	6.71503040371127e-07	-0.204235	0.365	0.408	0.014863
ST13	6.87820306836064e-07	0.357092	0.239	0.202	0.0152242
AHSA1	6.97175132519342e-07	0.392534	0.14	0.108	0.0154313
RPS9	7.04948957660606e-07	-0.251268	0.309	0.35	0.0156033
OXSR1	7.06401076846821e-07	-0.190113	0.323	0.369	0.0156355
ANGPTL5	7.06938823877991e-07	-1.2595	0.006	0.015	0.0156474
ZC3HAV1	7.18017672452791e-07	0.318716	0.465	0.433	0.0158926
RPL21	7.2206689189719e-07	-0.208212	0.301	0.346	0.0159822
SLC25A25-AS1	7.40157347607923e-07	-0.598348	0.043	0.063	0.0163826
JUN	7.40170697408545e-07	0.589244	0.104	0.077	0.0163829
DPH2	7.49632429312259e-07	-0.8187	0.022	0.037	0.0165924
SH3GL2	7.55882734870297e-07	-0.263795	0.151	0.186	0.0167307
KIAA0930	7.57656586480908e-07	-0.185176	0.349	0.394	0.01677
CHST12	7.72171817388908e-07	-0.458513	0.068	0.093	0.0170913
MALT1	7.72282887517667e-07	0.389873	0.333	0.298	0.0170937
DCAF1	7.77152010684977e-07	-0.281754	0.22	0.258	0.0172015
FCGR2A	8.02650056016656e-07	0.314384	0.46	0.43	0.0177659
RTN1	8.13521734923624e-07	-0.282822	0.233	0.273	0.0180065
TREML4	8.13802976276509e-07	1.82784	0.015	0.005	0.0180127
PECAM1	8.23442533061928e-07	0.238836	0.346	0.304	0.0182261
UCHL1	8.29147778564222e-07	-0.271347	0.201	0.239	0.0183524
SPG7	8.34136280308062e-07	-0.198531	0.351	0.396	0.0184628
IGF2BP3	8.34502576325941e-07	-0.96285	0.014	0.026	0.0184709
DNAJC2	8.42436425187909e-07	-0.283415	0.151	0.185	0.0186465
LRRK2	8.50280521237939e-07	0.250031	0.469	0.429	0.0188201
HLA-B	8.53325784376108e-07	-0.249076	0.368	0.409	0.0188875
APMAP	8.6524238913138e-07	-0.114185	0.458	0.509	0.0191513
ARHGAP32	8.99457430625567e-07	-0.163435	0.499	0.54	0.0199086
ADGRB3-DT	9.03619264791121e-07	-0.443945	0.054	0.077	0.0200007
PSMA5	9.04738866030251e-07	-0.374186	0.128	0.16	0.0200255
DUSP16	9.07713509615839e-07	0.325008	0.296	0.259	0.0200913
TNKS2	9.25706711295213e-07	-0.172041	0.422	0.465	0.0204896
KYAT3	9.27808499219478e-07	-0.266063	0.228	0.267	0.0205361
DPP10	9.28533312055018e-07	-0.120509	0.556	0.611	0.0205522
FBXL18	9.29374454839982e-07	-0.356009	0.113	0.143	0.0205708
LINC01645	9.31785345591148e-07	1.23632	0.022	0.009	0.0206241
GCN1	9.32747825085941e-07	-0.322504	0.153	0.186	0.0206454
ACY3	9.40301326327862e-07	-0.479948	0.041	0.061	0.0208126
GIPC3	9.42186118212163e-07	-1.00488	0.009	0.019	0.0208543
ACTR3B	9.44567333624943e-07	-0.336076	0.134	0.166	0.0209071
BTBD7	9.83608415234044e-07	-0.143485	0.513	0.556	0.0217712
HBP1	9.86521033307876e-07	0.285984	0.276	0.237	0.0218357
DGLUCY	9.86544605624949e-07	0.227966	0.352	0.309	0.0218362
LINC-PINT	9.88830847151805e-07	0.363698	0.195	0.16	0.0218868
ZNF385D-AS1	1.00378292780314e-06	-1.43784	0.006	0.014	0.0222177
RPL11	1.02180055727544e-06	-0.223554	0.359	0.401	0.0226165
MRPL18	1.02459328390195e-06	0.592653	0.087	0.062	0.0226783
CTSS	1.03108902605834e-06	0.248668	0.44	0.404	0.0228221
CYTH4	1.04054389523499e-06	-0.168278	0.412	0.46	0.0230314
TCERG1	1.04373940438143e-06	-0.22874	0.394	0.432	0.0231021
NRCAM	1.04484548505283e-06	-0.213516	0.249	0.291	0.0231266
SPI1	1.05665550093117e-06	-0.153988	0.409	0.457	0.023388
RNF141	1.06259725117913e-06	-0.319219	0.114	0.144	0.0235195
TTYH3	1.07612501732991e-06	0.313296	0.207	0.17	0.023819
PTMS	1.07866486420908e-06	-0.385751	0.078	0.104	0.0238752
LINC00279	1.08657209448926e-06	-1.65733	0.005	0.012	0.0240502
NEUROD1	1.10109703772656e-06	-1.16482	0.006	0.015	0.0243717
RAPGEF2	1.10493218482024e-06	-0.140808	0.732	0.765	0.0244566
HSPA6	1.1084199886876e-06	0.744469	0.13	0.1	0.0245338
FSCN1	1.12502337123886e-06	-0.184024	0.259	0.302	0.0249013
ANKRD30BL	1.16125858165392e-06	-0.379908	0.097	0.126	0.0257033
C2	1.16131763100759e-06	-0.432215	0.074	0.099	0.0257046
ACER2	1.16775509228605e-06	0.62417	0.063	0.041	0.0258471
CUX1	1.17514051626995e-06	0.130098	0.844	0.834	0.0260106
SHANK2	1.17671052267622e-06	-0.327238	0.096	0.124	0.0260453
ABHD2	1.18767513238021e-06	0.291045	0.351	0.313	0.026288
NECAB1	1.19613521853862e-06	-0.252871	0.15	0.185	0.0264753
ITPRIP	1.21545679233542e-06	-0.323823	0.149	0.182	0.0269029
CACNA1C	1.21999730697298e-06	-0.184432	0.251	0.294	0.0270034
MS4A6E	1.22611622532908e-06	0.930382	0.032	0.017	0.0271389
LY6G5B	1.2607345358927e-06	-0.629273	0.03	0.047	0.0279051
TP53INP1	1.27372145472976e-06	0.436022	0.152	0.121	0.0281926
GRM7	1.27687251144503e-06	-0.185027	0.234	0.276	0.0282623
FAM241A	1.28652709071199e-06	-0.482179	0.062	0.085	0.028476
ST20	1.28960153860548e-06	-0.325197	0.179	0.213	0.028544
TLR6	1.30015505120802e-06	-0.233757	0.289	0.329	0.0287776
VLDLR	1.31484757345435e-06	-0.546863	0.041	0.061	0.0291028
MOB3A	1.32954084141691e-06	0.295229	0.282	0.245	0.0294281
XKR4	1.35916101760996e-06	-0.244704	0.142	0.176	0.0300837
CACNA1B	1.39269829482597e-06	-0.209404	0.192	0.23	0.030826
RCL1	1.39283763482111e-06	-0.244675	0.195	0.232	0.0308291
SH2D3C	1.39579973632638e-06	-0.273009	0.157	0.192	0.0308946
CAB39	1.40316923053806e-06	-0.107301	0.777	0.81	0.0310577
ZNF107	1.44498618509218e-06	-0.287345	0.165	0.2	0.0319833
CCT3	1.44662953798536e-06	0.373884	0.2	0.165	0.0320197
LOXL3	1.46686777809773e-06	0.271564	0.317	0.277	0.0324677
SACS	1.46838294186548e-06	-0.365512	0.137	0.168	0.0325012
KDM1B	1.47444515123973e-06	-0.220924	0.289	0.331	0.0326354
AIDA	1.47718478933493e-06	-0.182206	0.4	0.441	0.032696
PGM5	1.47836806108369e-06	0.213764	0.436	0.395	0.0327222
RLF	1.49150035011635e-06	-0.137879	0.53	0.569	0.0330129
MED12L	1.49874345008121e-06	-0.14137	0.3	0.343	0.0331732
SLA	1.5045152776168e-06	-0.111402	0.628	0.68	0.0333009
ESYT1	1.52222948984991e-06	-0.424694	0.081	0.107	0.033693
PCDH11X	1.55372683535481e-06	-0.394695	0.077	0.102	0.0343902
SEC14L5	1.55781727297961e-06	-0.481228	0.056	0.078	0.0344807
KIDINS220	1.57659598194405e-06	-0.179869	0.492	0.532	0.0348964
TRIM24	1.58643321784933e-06	-0.262962	0.245	0.283	0.0351141
PNRC1	1.59718158698709e-06	0.273899	0.281	0.241	0.035352
PKD1L3	1.59893679145764e-06	-0.797382	0.015	0.027	0.0353909
SNHG8	1.60984136718377e-06	-0.338385	0.146	0.178	0.0356322
MLC1	1.61934226540326e-06	-1.01543	0.008	0.017	0.0358425
MTOR	1.64534344271411e-06	-0.192571	0.271	0.314	0.036418
DAPP1	1.65291742169302e-06	-0.282249	0.17	0.205	0.0365857
CKB	1.65580271788836e-06	-0.339747	0.128	0.159	0.0366495
SPTBN1	1.68480564356232e-06	-0.257549	0.185	0.221	0.0372915
GGNBP2	1.7030992607754e-06	-0.188449	0.37	0.412	0.0376964
IL3RA	1.7263750087624e-06	-0.267061	0.106	0.135	0.0382116
SNAI3-AS1	1.74577969636177e-06	0.528372	0.088	0.063	0.0386411
LINC00461	1.75738178331455e-06	-0.382509	0.083	0.109	0.0388979
STXBP2	1.78379423954574e-06	-0.317825	0.139	0.171	0.0394825
WRNIP1	1.79293682985161e-06	-0.267253	0.144	0.177	0.0396849
SNX19	1.79905174307232e-06	-0.201061	0.273	0.315	0.0398202
ATXN1	1.82011501688364e-06	0.111006	0.871	0.844	0.0402864
LINC01515	1.84603597882163e-06	-0.751536	0.018	0.031	0.0408602
ZNF506	1.8570136698685e-06	-0.217276	0.245	0.286	0.0411031
RGCC	1.86098014735018e-06	2.08611	0.029	0.014	0.0411909
ZNF556	1.86403500301265e-06	-0.807073	0.018	0.031	0.0412586
ARHGAP4	1.89435086871774e-06	-0.201063	0.314	0.356	0.0419296
BRINP1	1.90100630126527e-06	-0.336946	0.089	0.116	0.0420769
GOSR2	1.92136075244417e-06	-0.259725	0.201	0.238	0.0425274
CD14	1.93211112997295e-06	-0.183157	0.338	0.381	0.0427653
ADORA2A	1.99757333146339e-06	-1.06998	0.009	0.018	0.0442143
PRDM2	2.02837019305713e-06	0.175083	0.511	0.469	0.0448959
UBR5-DT	2.06742124650924e-06	0.323483	0.187	0.152	0.0457603
RASAL2	2.0705806758916e-06	0.161273	0.758	0.737	0.0458302
ATP2A2	2.13804482448111e-06	-0.145371	0.462	0.505	0.0473235
PPP2R2B	2.20726914622141e-06	-0.105038	0.298	0.344	0.0488557
HDAC7	2.22415618617547e-06	-0.255872	0.217	0.254	0.0492295
RPL39	2.23145824932665e-06	-0.183871	0.208	0.247	0.0493911
C1RL-AS1	2.35302114514672e-06	-0.725263	0.028	0.043	0.0520818
GRIN1	2.35755878967313e-06	-0.233149	0.196	0.233	0.0521822
IER3	2.44608041132069e-06	0.545251	0.161	0.13	0.0541415
PTPRN2	2.46243723514015e-06	-0.231689	0.241	0.28	0.0545036
FGF12	2.49988673481596e-06	-0.140468	0.336	0.384	0.0553325
ZNF480	2.51422599980271e-06	-0.398875	0.09	0.116	0.0556499
RPS10	2.51567441322255e-06	-0.393056	0.121	0.15	0.0556819
FNBP1L	2.52972656777039e-06	-0.178497	0.464	0.502	0.055993
GBGT1	2.54307214758817e-06	-0.31334	0.13	0.161	0.0562884
CASS4	2.56973696486511e-06	0.322554	0.237	0.2	0.0568786
UIMC1	2.5723841594168e-06	-0.189173	0.346	0.389	0.0569372
NAA40	2.60003855815618e-06	-0.241237	0.179	0.214	0.0575493
CYP46A1	2.69313831809405e-06	-0.56417	0.043	0.062	0.0596099
NHSL1	2.71586718967416e-06	0.234836	0.577	0.548	0.060113
ITGB7	2.72112961906943e-06	-1.4938	0.005	0.012	0.0602295
SLFNL1-AS1	2.73777022867285e-06	-0.505976	0.045	0.064	0.0605978
TMEM108	2.78093288426021e-06	-0.225156	0.152	0.186	0.0615532
NAA38	2.79624016300859e-06	-0.42233	0.049	0.069	0.061892
SLC29A1	2.79918452155636e-06	-0.328852	0.13	0.161	0.0619572
RPL29	2.82258080187907e-06	-0.298376	0.185	0.22	0.062475
LPCAT2	2.8520238147299e-06	-0.100252	0.878	0.908	0.0631267
DCLRE1C	2.87069363214859e-06	-0.221152	0.239	0.278	0.0635399
MLKL	2.89837205510204e-06	-0.338736	0.124	0.154	0.0641526
RAP2A	2.92967580100784e-06	-0.226997	0.302	0.341	0.0648454
DNAJC13	2.94727543590694e-06	-0.147272	0.553	0.591	0.065235
CRTC3	3.01529217645856e-06	0.50291	0.116	0.088	0.0667405
KLF2	3.08002720261517e-06	0.88859	0.036	0.02	0.0681733
LINC02976	3.09291866223395e-06	-0.282252	0.158	0.191	0.0684587
KCNQ5	3.12671285623282e-06	-0.117049	0.359	0.405	0.0692067
PLCL1	3.12990717327727e-06	0.261085	0.381	0.344	0.0692774
FAM171B	3.15037667171481e-06	-0.403782	0.071	0.094	0.0697304
LINC00544	3.16218928868278e-06	-1.05219	0.008	0.017	0.0699919
KCNJ2	3.20879543526953e-06	-0.388893	0.09	0.116	0.0710235
TDRD10	3.33049358828942e-06	-0.52113	0.032	0.049	0.0737171
TADA2A	3.37084849201859e-06	-0.312573	0.209	0.243	0.0746104
GAS2	3.37152444257409e-06	-0.479294	0.066	0.089	0.0746253
HLA-DRB5	3.38120732316251e-06	-0.1551	0.268	0.31	0.0748396
STX17-DT	3.4497678579396e-06	1.34755	0.026	0.013	0.0763572
LINC00685	3.48569245247572e-06	-0.424543	0.085	0.11	0.0771523
CD93	3.53046686533016e-06	-0.262118	0.151	0.184	0.0781434
EEF1B2	3.5512618027074e-06	-0.288207	0.161	0.194	0.0786036
ELOVL6	3.5524380023966e-06	-0.327169	0.171	0.204	0.0786297
NEURL2	3.57722506329796e-06	-1.04397	0.016	0.027	0.0791783
RPS7	3.58219294377601e-06	-0.270993	0.219	0.256	0.0792883
NOC3L	3.65591427205744e-06	-0.316133	0.136	0.167	0.08092
MYO5A	3.67656371014603e-06	0.161062	0.612	0.583	0.0813771
UNC93B1	3.69772394866635e-06	-0.233221	0.267	0.306	0.0818454
IL10RA	3.69831666314148e-06	0.190447	0.435	0.395	0.0818585
NRIP1	3.73524464743531e-06	0.173641	0.815	0.816	0.0826759
OTULINL	3.74360743973977e-06	0.230601	0.492	0.462	0.082861
PRR5L	3.74968059001942e-06	0.740353	0.034	0.018	0.0829954
SNX3	3.79937386216161e-06	0.289867	0.319	0.284	0.0840953
BCL2L2-PABPN1	3.82570675007658e-06	-0.32705	0.115	0.144	0.0846782
FAT3	3.85661942085297e-06	-0.349875	0.123	0.152	0.0853624
COA1	3.87722554496142e-06	-0.156359	0.417	0.459	0.0858185
NEK6	3.93037582371893e-06	-0.200377	0.378	0.417	0.0869949
GPC5	3.94727839995909e-06	-0.232011	0.132	0.163	0.0873691
CDK19	3.95175952194563e-06	0.16482	0.574	0.54	0.0874682
KIAA1217	4.06381727068248e-06	-0.222143	0.168	0.203	0.0899485
DNAJC3	4.08177222143829e-06	-0.195743	0.44	0.475	0.0903459
CACNA2D3	4.15092982145238e-06	-0.214688	0.229	0.267	0.0918767
MARCHF7	4.16897078468659e-06	-0.142668	0.57	0.602	0.092276
CT69	4.17108058123782e-06	0.666382	0.055	0.035	0.0923227
CACNA1E	4.20695451554323e-06	-0.308556	0.107	0.136	0.0931167
DDX10	4.2391783466424e-06	-0.178482	0.424	0.463	0.09383
HHAT	4.27784874186047e-06	0.484412	0.101	0.075	0.0946859
NME1	4.28194707640899e-06	-0.617346	0.034	0.051	0.0947766
PPFIA4	4.3296327004985e-06	-0.38481	0.079	0.104	0.0958321
NMNAT2	4.353149990678e-06	-0.308889	0.116	0.146	0.0963526
GPC5-AS1	4.35397858592494e-06	-1.15244	0.007	0.016	0.096371
LINC01091	4.43647477957788e-06	-0.342614	0.249	0.286	0.0981969
SNX7	4.44867335112654e-06	-0.297034	0.127	0.157	0.0984669
BCAS2	4.47981456826248e-06	0.716455	0.077	0.054	0.0991562
TMEM176A	4.4860810149843e-06	-0.536708	0.045	0.064	0.0992949
CNNM2	4.50458558443449e-06	0.337153	0.267	0.233	0.0997045
ZNRF1	4.51545895956836e-06	-0.331299	0.123	0.152	0.0999452
TRAF2	4.54433033882191e-06	0.457248	0.092	0.067	0.100584
HACD4	4.55137026351168e-06	0.278667	0.215	0.18	0.10074
DNHD1	4.58920012043282e-06	-0.247338	0.184	0.218	0.101577
LINC02234	4.61410917038144e-06	-1.31585	0.004	0.011	0.102129
GAB3	4.70954582281725e-06	-0.145963	0.542	0.58	0.104241
EIF3B	4.72139865319337e-06	-0.289999	0.151	0.182	0.104503
APEX1	4.72318404894996e-06	-0.384524	0.082	0.106	0.104543
ZSWIM5	4.81809864916612e-06	-0.278201	0.092	0.119	0.106644
MPP1	4.83012117538101e-06	0.450827	0.145	0.115	0.10691
PDSS1	4.90434863623772e-06	-0.375427	0.099	0.125	0.108553
CTSA	4.98856250576253e-06	-0.351467	0.109	0.137	0.110417
MOV10L1	4.99270427588689e-06	-0.988938	0.013	0.024	0.110509
RPL5	5.08318050699611e-06	-0.179714	0.365	0.405	0.112511
UBR2	5.0838110709411e-06	0.167438	0.555	0.52	0.112525
VDAC1	5.13874402680622e-06	-0.239774	0.207	0.243	0.113741
GSTK1	5.15001795092958e-06	-0.311139	0.13	0.159	0.11399
CSGALNACT1	5.16014757581602e-06	0.154567	0.879	0.903	0.114215
TIMP1	5.17584916400183e-06	1.23459	0.024	0.011	0.114562
GAB1	5.19106619559731e-06	0.172366	0.493	0.452	0.114899
CMKLR1	5.23332554867968e-06	0.195217	0.467	0.428	0.115834
AKAP9	5.23979470946478e-06	0.139917	0.554	0.516	0.115978
VIM	5.31068212946335e-06	1.03398	0.027	0.014	0.117547
NOL10	5.32412610193447e-06	-0.205772	0.293	0.332	0.117844
PTPN18	5.3478483630805e-06	-0.154594	0.408	0.449	0.118369
PRKG1	5.36777679669284e-06	-0.230006	0.168	0.201	0.11881
SLFN5	5.38943465699021e-06	0.592964	0.077	0.055	0.11929
BIN2	5.41868871471682e-06	-0.177243	0.379	0.42	0.119937
WBP1L	5.42306265332797e-06	0.210265	0.37	0.331	0.120034
MAPK10	5.4281008433467e-06	-0.13376	0.391	0.438	0.120146
FAM162A	5.48316899371633e-06	-0.391668	0.127	0.156	0.121364
P4HB	5.49049911275241e-06	-0.307858	0.194	0.228	0.121527
BDH1	5.49742902447943e-06	-0.340006	0.117	0.145	0.12168
TFDP2	5.54096843699637e-06	0.278741	0.251	0.216	0.122644
ANXA1	5.56446140481699e-06	1.26101	0.02	0.009	0.123164
NR6A1	5.56527903132867e-06	-0.197051	0.226	0.264	0.123182
H2BC8	5.5814335194325e-06	0.379784	0.089	0.065	0.123539
TJP1	5.69207021940537e-06	-0.130849	0.334	0.381	0.125988
TSPAN7	5.69729752918219e-06	-0.344377	0.109	0.136	0.126104
CTNNB1	5.70384457547005e-06	0.2363	0.518	0.491	0.126249
NUP50	5.70991186877765e-06	-0.247371	0.151	0.183	0.126383
EMC1	5.72770428686495e-06	-0.393445	0.087	0.112	0.126777
TGFB1	5.78113318118364e-06	-0.187937	0.455	0.492	0.12796
WIPI2	5.78702443347201e-06	0.234267	0.262	0.225	0.12809
RAC2	5.8089219166665e-06	-0.449409	0.059	0.08	0.128575
VAMP2	5.8134446181039e-06	-0.277082	0.166	0.198	0.128675
GLCCI1	5.84201781824855e-06	0.242457	0.372	0.332	0.129307
RASSF1	5.91459000374363e-06	0.252676	0.248	0.211	0.130914
CLEC2D	5.97538858150131e-06	-0.204653	0.356	0.394	0.132259
ITGAM	6.01867859672984e-06	-0.166452	0.512	0.545	0.133217
DYNC2I1	6.0553863875416e-06	-0.250273	0.205	0.239	0.13403
ABCA10	6.0836088312135e-06	-0.437839	0.045	0.064	0.134655
DHX34	6.09852455444057e-06	0.278452	0.2	0.166	0.134985
YEATS2	6.11946461654743e-06	-0.156504	0.382	0.423	0.135448
BCAT1	6.13613723242393e-06	-0.172258	0.405	0.444	0.135817
AGTPBP1	6.13780442636115e-06	-0.140891	0.527	0.564	0.135854
LRP8	6.16257059866422e-06	-0.22336	0.178	0.213	0.136402
RACK1	6.18252199967564e-06	-0.221314	0.245	0.283	0.136844
EFCAB2	6.19500490051243e-06	0.304594	0.163	0.131	0.13712
MBD4	6.20268566241085e-06	-0.244498	0.234	0.27	0.13729
SCN1A	6.24808152420511e-06	-0.300292	0.141	0.171	0.138295
GMDS	6.3039945144043e-06	-0.135277	0.506	0.547	0.139533
GMPS	6.33797209506021e-06	-0.245101	0.216	0.252	0.140285
TPK1	6.34004525167035e-06	-0.13492	0.608	0.648	0.140331
LILRB5	6.34054243203123e-06	1.3528	0.018	0.007	0.140342
KAT2B	6.35701197028192e-06	0.269851	0.348	0.312	0.140706
AZIN1	6.4380326957983e-06	0.363484	0.229	0.196	0.142499
PTPN11	6.44596019783497e-06	-0.253849	0.255	0.291	0.142675
NME4	6.45362891243968e-06	-0.504521	0.044	0.063	0.142845
ZNF302	6.45389497174176e-06	-0.276254	0.133	0.164	0.142851
CA10	6.48329364914787e-06	-0.326387	0.082	0.106	0.143501
ABCB4	6.4878891711751e-06	-0.528978	0.068	0.09	0.143603
ASCC2	6.53291517851613e-06	-0.181187	0.238	0.276	0.1446
C4orf3	6.56888324655816e-06	-0.343072	0.115	0.143	0.145396
TSHZ1	6.64630837324049e-06	0.424543	0.144	0.116	0.147109
ID2	6.66237910801558e-06	-0.390806	0.165	0.196	0.147465
CEP170B	6.73102284623175e-06	-0.693331	0.02	0.033	0.148984
TEX11	6.83695898087608e-06	-0.861388	0.013	0.023	0.151329
TRG-AS1	6.87278332637539e-06	-0.397084	0.067	0.09	0.152122
L3HYPDH	6.91171050915002e-06	-0.345457	0.094	0.119	0.152984
TBCK	6.93218423082889e-06	0.18041	0.579	0.551	0.153437
GOLIM4	6.97985995501063e-06	0.311559	0.217	0.183	0.154492
ARF3	7.00002664957182e-06	-0.322956	0.144	0.174	0.154939
ARMC8	7.00807906962742e-06	-0.174956	0.394	0.433	0.155117
NAT10	7.01653854035611e-06	-0.326116	0.126	0.154	0.155304
EFHD2	7.05771312548569e-06	-0.269924	0.189	0.222	0.156215
ZNF528-AS1	7.06461527383347e-06	-0.447721	0.05	0.069	0.156368
LINC02389	7.15237519829525e-06	-0.471388	0.077	0.1	0.158311
NFASC	7.21208405187431e-06	-0.352338	0.102	0.129	0.159632
CREBZF	7.27818186906291e-06	-0.232434	0.183	0.217	0.161095
RELT	7.36301440234272e-06	-0.287087	0.141	0.171	0.162973
DPY19L3	7.36571968596534e-06	-0.205593	0.223	0.26	0.163033
WNT5B	7.60322508059394e-06	0.613823	0.065	0.045	0.16829
MS4A4A	7.62041386594705e-06	0.198777	0.318	0.278	0.16867
STXBP5L	7.64115819526185e-06	-0.110856	0.346	0.391	0.169129
WDR3	7.64518902695108e-06	-0.416437	0.066	0.088	0.169219
SNHG4	7.73685396462213e-06	-0.651598	0.03	0.046	0.171248
MDM4	7.75311543012642e-06	-0.12157	0.519	0.559	0.171607
EML4-AS1	7.85022111113857e-06	-0.586522	0.032	0.048	0.173757
BTG1	7.87860727172708e-06	0.411504	0.211	0.179	0.174385
ZZZ3	7.88227571771123e-06	-0.148406	0.485	0.525	0.174466
ZNF883	7.89121608191612e-06	-0.628912	0.021	0.034	0.174664
POLR2A	7.90127116349174e-06	-0.286431	0.174	0.206	0.174887
SFXN1	7.90609652034602e-06	-0.277575	0.171	0.204	0.174994
RPS8	7.96755155065878e-06	-0.185084	0.363	0.401	0.176354
CCDC18-AS1	7.97620278220951e-06	0.175044	0.596	0.564	0.176545
RPS27A	8.01032963831298e-06	-0.254191	0.315	0.353	0.177301
ARHGAP45	8.05385494603312e-06	-0.196402	0.256	0.294	0.178264
MRPL3	8.06306640656113e-06	-0.231541	0.247	0.283	0.178468
SF3B1	8.08988789042968e-06	-0.148753	0.436	0.475	0.179062
EIF2B3	8.15169018039782e-06	-0.215784	0.331	0.368	0.18043
CDH18	8.23127160886736e-06	-0.167224	0.291	0.333	0.182191
LRRC37A2	8.29384761695261e-06	0.297431	0.209	0.176	0.183576
NBEAL2	8.33461510075101e-06	-0.426137	0.067	0.089	0.184478
LY86	8.40791588763457e-06	0.112305	0.797	0.786	0.186101
EIF4H	8.41956248378607e-06	-0.251355	0.183	0.216	0.186359
ACYP2	8.45307014656062e-06	0.18536	0.511	0.476	0.1871
B4GALT4	8.47118437303578e-06	-0.282263	0.141	0.171	0.187501
GBE1	8.48818672187304e-06	-0.137657	0.382	0.417	0.187878
BLCAP	8.53708619213184e-06	-0.245194	0.216	0.251	0.18896
GPRIN3	8.5744128184635e-06	0.192134	0.554	0.519	0.189786
SLC4A10	8.67210226584827e-06	-0.204558	0.25	0.289	0.191948
PIK3R5	8.6741706177397e-06	0.139919	0.8	0.792	0.191994
KIF3C	8.75623058860412e-06	-0.257591	0.202	0.236	0.19381
PIK3CD-AS2	8.91583804460775e-06	-0.523254	0.033	0.049	0.197343
NRARP	9.0208187545053e-06	1.92673	0.012	0.004	0.199667
ASTN1	9.10143433747537e-06	-0.269146	0.135	0.165	0.201451
SLC13A3	9.23750577095033e-06	-0.471006	0.052	0.071	0.204463
CCDC170	9.28094569045003e-06	0.949891	0.035	0.02	0.205424
CFLAR	9.47285024721631e-06	0.168518	0.637	0.617	0.209672
ZER1	9.51475895601175e-06	0.297366	0.188	0.156	0.2106
PIH1D1	9.52719122488932e-06	-0.357536	0.079	0.103	0.210875
PCDH7	9.59912912180167e-06	-0.216443	0.284	0.321	0.212467
C4orf19	9.65336865658797e-06	-0.19612	0.174	0.209	0.213668
PGAM1	9.74151703238109e-06	-0.380773	0.091	0.115	0.215619
CD53	9.75018047760342e-06	-0.125689	0.668	0.702	0.21581
UNC13C	9.84544625445483e-06	-0.376151	0.073	0.096	0.217919
RFLNB	9.93495088885098e-06	-0.931949	0.01	0.019	0.2199
TXNDC15	9.93741754723307e-06	-0.304215	0.137	0.167	0.219955
RGS19	9.94510045313621e-06	-0.207957	0.222	0.258	0.220125
KHDRBS2	9.96812863841971e-06	-0.158356	0.363	0.411	0.220635
FXYD6	9.98182503878163e-06	-0.341353	0.084	0.109	0.220938
CFB	9.99501277563394e-06	-0.991397	0.01	0.019	0.22123
STRBP	1.00209215588822e-05	0.224838	0.455	0.421	0.221803
ATP6AP1	1.01092911412702e-05	-0.29619	0.136	0.165	0.223759
UCP2	1.02137469364562e-05	-0.301467	0.134	0.163	0.226071
PPP1CB	1.02276787926264e-05	0.199406	0.425	0.391	0.226379
DNM1L	1.03026675873017e-05	-0.191426	0.344	0.382	0.228039
CRLS1	1.03451493417072e-05	-0.232789	0.247	0.283	0.22898
ATP1A3	1.0372096324782e-05	-0.405418	0.064	0.086	0.229576
DUSP3	1.05519818109807e-05	-0.346737	0.097	0.123	0.233558
MCL1	1.05996829642034e-05	0.341289	0.216	0.183	0.234613
CD47	1.06617332144978e-05	0.229045	0.284	0.247	0.235987
CSTF3	1.07068900732731e-05	-0.187722	0.297	0.337	0.236986
TMEM132B	1.08867223111892e-05	-0.172044	0.182	0.217	0.240967
FAM32A	1.09240134932135e-05	-0.580747	0.039	0.056	0.241792
PDE10A	1.10614534630601e-05	0.500677	0.12	0.094	0.244834
PRKCZ	1.11556933129142e-05	0.347395	0.147	0.118	0.24692
TBXA2R	1.11963975559962e-05	-1.08734	0.007	0.016	0.247821
DAGLB	1.120282031389e-05	-0.170897	0.374	0.414	0.247963
CSMD3	1.13155628585553e-05	-0.108117	0.335	0.382	0.250459
PAK1	1.1354494825157e-05	-0.178288	0.445	0.478	0.25132
NEIL2	1.15713270503587e-05	-0.369824	0.076	0.099	0.25612
CCNT2-AS1	1.15852435732005e-05	-0.482765	0.063	0.084	0.256428
RIOX2	1.15930567876452e-05	-0.386877	0.098	0.123	0.256601
PTPRS	1.16866965937146e-05	-0.304416	0.097	0.123	0.258673
AIMP2	1.1723070274084e-05	-0.442748	0.068	0.09	0.259478
PRKCE	1.17535055039305e-05	-0.110612	0.501	0.543	0.260152
APPL1	1.18573707562603e-05	-0.164132	0.33	0.369	0.262451
KAT6A	1.19780941700054e-05	-0.107415	0.697	0.723	0.265123
ANGPTL6	1.20202379786786e-05	1.21063	0.015	0.006	0.266056
TRA2B	1.20801602989814e-05	0.193647	0.515	0.48	0.267382
ACADVL	1.217900953739e-05	-0.313943	0.137	0.166	0.26957
NPFFR1	1.24406476328608e-05	-1.24881	0.005	0.011	0.275361
ACSBG2	1.26800443071061e-05	-1.0815	0.007	0.015	0.28066
LINC01410	1.26859757712945e-05	-0.216425	0.294	0.331	0.280791
IDS	1.27455273451566e-05	-0.167513	0.325	0.366	0.28211
SLC36A1	1.28419682510129e-05	0.321288	0.166	0.136	0.284244
CACNA1D	1.29172537719471e-05	0.200783	0.49	0.455	0.28591
TM9SF4	1.2937665028419e-05	-0.163771	0.317	0.357	0.286362
MARK3	1.29579077889306e-05	0.134163	0.72	0.706	0.28681
ZNF180	1.29746336062215e-05	-0.473674	0.056	0.076	0.287181
ICA1L	1.30412912666332e-05	-0.337093	0.119	0.147	0.288656
ATIC	1.30973820099684e-05	-0.312078	0.113	0.14	0.289897
PIM3	1.31039984266505e-05	-0.427762	0.061	0.081	0.290044
RPS3A	1.31366010586868e-05	-0.221159	0.249	0.284	0.290766
TLR5	1.32669499665633e-05	-0.16441	0.397	0.438	0.293651
TMEM87B	1.32809555462975e-05	-0.201772	0.241	0.277	0.293961
NKTR	1.33419955473723e-05	-0.112362	0.582	0.617	0.295312
SYT4	1.35910826720349e-05	-0.541983	0.037	0.054	0.300825
PRAM1	1.36730705952025e-05	-0.12305	0.415	0.461	0.30264
SLC2A10	1.36745601107879e-05	1.12851	0.022	0.01	0.302673
GFM1	1.37220545127503e-05	-0.258774	0.179	0.21	0.303724
HRH1	1.38066715441083e-05	0.585734	0.088	0.065	0.305597
FAM120C	1.38498869589345e-05	-0.245972	0.18	0.213	0.306553
ARMH1	1.39076456383745e-05	-0.393445	0.07	0.092	0.307832
MAN1A1	1.41485585100543e-05	0.191074	0.552	0.52	0.313164
TNFSF12	1.41511848834845e-05	-0.338702	0.11	0.136	0.313222
CAMKV	1.42051142431196e-05	-0.495173	0.042	0.059	0.314416
LRRC20	1.42289498014945e-05	-0.464039	0.045	0.063	0.314944
OSBPL5	1.43900532803322e-05	-0.468645	0.039	0.056	0.318509
IFNAR1	1.44328571287298e-05	-0.159086	0.314	0.355	0.319457
GPC4	1.44794227791606e-05	-0.941686	0.01	0.018	0.320488
FNIP2	1.45044995351868e-05	0.204301	0.626	0.6	0.321043
MORC2-AS1	1.46112831886707e-05	-0.997825	0.009	0.018	0.323406
ECHS1	1.46179991438217e-05	-0.474365	0.05	0.069	0.323555
SH3BGRL	1.46705944008107e-05	-0.145715	0.758	0.777	0.324719
HNRNPR	1.46743727256544e-05	-0.192622	0.324	0.361	0.324803
OSBPL8	1.47924361434739e-05	0.199831	0.515	0.486	0.327416
H2BC7	1.48816961718273e-05	0.528164	0.074	0.053	0.329391
PCBP2	1.49736119867685e-05	-0.188783	0.403	0.439	0.331426
ST6GALNAC6	1.50947564582265e-05	-0.399558	0.068	0.089	0.334107
MSLN	1.51164448716987e-05	-0.949092	0.008	0.017	0.334587
KHDRBS3	1.52080152293778e-05	0.228832	0.708	0.706	0.336614
WIF1	1.52468375109136e-05	-0.897271	0.009	0.017	0.337474
FAU	1.52767057863113e-05	-0.215724	0.222	0.255	0.338135
MROH7	1.5491282007771e-05	0.457824	0.083	0.061	0.342884
COL9A2	1.55071078763293e-05	0.434081	0.102	0.077	0.343234
PRRC2A	1.57859081918842e-05	-0.273857	0.176	0.208	0.349405
PLIN2	1.59192356976834e-05	1.00544	0.077	0.056	0.352356
LDB2	1.60667003198682e-05	-0.130271	0.23	0.269	0.35562
MARCKS	1.6385063209806e-05	-0.15896	0.412	0.452	0.362667
CCSER2	1.63886527778405e-05	-0.147662	0.492	0.531	0.362746
CCDC146	1.66610930322824e-05	-0.235607	0.301	0.337	0.368777
NLN	1.6715556338528e-05	-0.2893	0.191	0.222	0.369982
NCDN	1.69251055371129e-05	-0.345302	0.084	0.107	0.37462
GALK2	1.69461629874719e-05	0.235706	0.34	0.305	0.375086
INPP4A	1.70300580131893e-05	0.166596	0.625	0.6	0.376943
SKAP2	1.71306834806654e-05	0.121403	0.924	0.932	0.379171
BCOR	1.73043275738583e-05	-0.27577	0.145	0.174	0.383014
TANC1	1.73589880307069e-05	-0.141109	0.352	0.393	0.384224
RXRA	1.77352537501938e-05	0.321822	0.217	0.186	0.392552
SLC49A4	1.79836337983623e-05	0.241174	0.316	0.28	0.39805
COL25A1	1.79934644501193e-05	-0.465163	0.072	0.093	0.398267
SNRNP70	1.82722795621316e-05	-0.163591	0.431	0.469	0.404439
LRRC41	1.84215001394551e-05	-0.32268	0.136	0.163	0.407741
POLR1D	1.85222498520527e-05	-0.261293	0.169	0.201	0.409971
ZRANB3	1.85518090672906e-05	-0.222439	0.221	0.256	0.410626
RPL35A	1.8758730900776e-05	-0.219904	0.201	0.236	0.415206
ADGRE5	1.89884036622841e-05	-0.522728	0.036	0.052	0.420289
PPRC1	1.9014203987089e-05	-0.427877	0.086	0.109	0.42086
NT5DC2	1.91095225699917e-05	-0.905344	0.012	0.022	0.42297
PLCE1	1.91382257441372e-05	-0.55013	0.037	0.053	0.423605
SOS1	1.91746566077263e-05	0.160728	0.617	0.586	0.424412
NCAM1	1.91767266873776e-05	-0.160853	0.209	0.245	0.424458
PADI1	1.92619002797382e-05	1.45588	0.014	0.005	0.426343
RALGDS	1.93395166662668e-05	-0.277493	0.155	0.184	0.428061
RPL31	1.96463238995528e-05	-0.136102	0.29	0.331	0.434852
PCSK2	1.98666644357127e-05	-0.287802	0.108	0.135	0.439729
LINC02224	2.00212094874902e-05	-0.602009	0.022	0.035	0.443149
DDX59	2.00972809892162e-05	-0.295774	0.118	0.144	0.444833
SSBP3	2.0173461614632e-05	0.342768	0.232	0.201	0.446519
RPS15A	2.03066472056425e-05	-0.270219	0.222	0.255	0.449467
RPS16	2.05061198587797e-05	-0.212497	0.249	0.285	0.453882
MLX	2.07877116848257e-05	-0.300489	0.129	0.157	0.460115
ST3GAL6	2.08297422618432e-05	0.148621	0.559	0.521	0.461046
LMO1	2.0898053938377e-05	-0.293514	0.072	0.094	0.462558
MORC3	2.13348304379589e-05	0.182	0.456	0.417	0.472225
MGAT4C	2.14013691800288e-05	-0.17919	0.145	0.175	0.473698
SNHG21	2.14620385094445e-05	-0.612179	0.031	0.045	0.475041
FLVCR1	2.15238632640233e-05	-0.257719	0.136	0.165	0.476409
ATP1A2	2.17011450432362e-05	-0.440382	0.036	0.052	0.480333
ANXA2R-AS1	2.17866022602621e-05	0.29035	0.167	0.137	0.482225
NEFM	2.18583278399194e-05	-0.556591	0.033	0.048	0.483812
SELENOW	2.22212771672712e-05	0.323191	0.185	0.155	0.491846
SLC4A4	2.22840792583801e-05	-0.371519	0.05	0.068	0.493236
RASA2	2.23101151768698e-05	0.168022	0.523	0.492	0.493812
RPF2	2.24609098254982e-05	-0.313114	0.117	0.144	0.49715
IQGAP2	2.26790788209517e-05	0.48818	0.175	0.148	0.501979
NLRP3	2.27579326017399e-05	0.281378	0.219	0.186	0.503724
ZNF521	2.30322166174485e-05	-0.583037	0.024	0.037	0.509795
ETV1	2.34071576229715e-05	0.651049	0.042	0.027	0.518094
XIST	2.35377079773158e-05	0.120976	0.597	0.56	0.520984
GAPVD1	2.36431444779582e-05	-0.13678	0.455	0.489	0.523317
RGS12	2.3664153915642e-05	0.158953	0.552	0.524	0.523782
RAB7B	2.3773888305442e-05	1.93002	0.011	0.003	0.526211
GPR89B	2.40148433666317e-05	0.416821	0.1	0.077	0.531545
PSME2	2.43437129789316e-05	-0.434734	0.056	0.076	0.538824
SEPTIN1	2.43840974035444e-05	-0.598063	0.023	0.036	0.539718
SCARF1	2.44200822324646e-05	-0.270784	0.132	0.161	0.540514
SLC17A9	2.48537901012743e-05	0.384851	0.122	0.097	0.550114
RPE	2.49966610721243e-05	-0.228386	0.227	0.259	0.553276
ARHGEF35-AS1	2.52942268920833e-05	1.20023	0.018	0.008	0.559862
GPCPD1	2.5303026613859e-05	0.13556	0.59	0.548	0.560057
WDR11	2.53129636203709e-05	0.167729	0.36	0.321	0.560277
PSMA3-AS1	2.57665583097538e-05	-0.180316	0.314	0.351	0.570317
TSPOAP1	2.61669697986719e-05	-0.5126	0.046	0.063	0.57918
BAALC-AS1	2.67098436113162e-05	0.447004	0.055	0.037	0.591196
SMARCA2	2.68460712011085e-05	0.140085	0.708	0.697	0.594211
H4C3	2.6976162623311e-05	0.455078	0.106	0.082	0.59709
SYNE3	2.72235640598383e-05	-0.486269	0.056	0.075	0.602566
IL15RA	2.73403859466494e-05	-0.259226	0.112	0.138	0.605152
NEBL	2.73693291817633e-05	-0.182487	0.169	0.201	0.605793
SUMO3	2.74723128492005e-05	-0.439369	0.067	0.088	0.608072
H4C5	2.7500763456425e-05	0.689441	0.041	0.026	0.608702
RAB30-DT	2.75556945592636e-05	-0.188898	0.241	0.276	0.609918
HNRNPA1	2.76274656950941e-05	-0.230905	0.235	0.268	0.611506
NRSN2	2.7866781706177e-05	-0.629205	0.027	0.041	0.616803
ZNF525	2.79183908685178e-05	-0.407817	0.059	0.079	0.617946
DNER	2.81764833665334e-05	-0.385583	0.068	0.089	0.623658
OR3A2	2.82134908636987e-05	-0.367059	0.072	0.093	0.624477
ST3GAL1	2.82503512494662e-05	0.176203	0.436	0.397	0.625293
AQP4	2.86543977332796e-05	-0.555196	0.027	0.041	0.634236
SCN2A	2.87025455428911e-05	-0.231349	0.172	0.202	0.635302
PMFBP1	2.87926853577698e-05	0.573388	0.059	0.041	0.637297
COX5B	2.8849635638447e-05	0.420142	0.09	0.068	0.638558
POLE2	2.92861767319824e-05	-0.339992	0.064	0.085	0.64822
CASP7	2.93281497223814e-05	0.40797	0.089	0.067	0.649149
WDR46	2.94428275422392e-05	-0.451672	0.051	0.069	0.651688
ACTR5	2.94937728238392e-05	-0.424749	0.054	0.073	0.652815
STX18-AS1	2.95797307263442e-05	-0.308212	0.141	0.169	0.654718
ABCA7	2.96375443144983e-05	-0.397795	0.058	0.077	0.655997
SLC25A32	2.99218048615281e-05	0.214127	0.232	0.198	0.662289
PGK1	3.00568970596779e-05	-0.117313	0.355	0.392	0.665279
PTPRT	3.0292297940642e-05	-0.178208	0.187	0.22	0.67049
GLIPR1L1	3.05004510302751e-05	0.795063	0.048	0.032	0.675097
SERPINB8	3.05288285482378e-05	-0.651243	0.027	0.04	0.675725
NIPAL1	3.06499751726822e-05	1.17954	0.022	0.011	0.678407
ABCA12	3.06606244354499e-05	-1.32931	0.005	0.012	0.678642
RPL22L1	3.07738732664647e-05	-0.382373	0.069	0.09	0.681149
SCN1B	3.08866137004664e-05	-0.249805	0.184	0.215	0.683644
SLC22A18	3.12278199074362e-05	0.521931	0.056	0.039	0.691197
SF3B3	3.12470659965451e-05	-0.201012	0.241	0.275	0.691623
NTAQ1	3.12750945903574e-05	-0.3786	0.093	0.116	0.692243
SZT2	3.16104889428044e-05	-0.233341	0.207	0.238	0.699667
HCRTR2	3.16911852225548e-05	-0.976259	0.008	0.016	0.701453
NOP2	3.17032973870403e-05	-0.434564	0.081	0.102	0.701721
ZADH2	3.19621809345713e-05	0.324685	0.183	0.154	0.707451
LINC00663	3.21433094714625e-05	0.814753	0.03	0.017	0.71146
MARS1	3.25952719065549e-05	-0.173952	0.29	0.327	0.721464
NEK7	3.2679370737288e-05	0.146467	0.507	0.47	0.723325
PRPF40A	3.27331616118034e-05	-0.113603	0.367	0.409	0.724516
SNHG16	3.27874584732429e-05	-0.390363	0.067	0.087	0.725718
TACC1	3.29414681601773e-05	0.164013	0.545	0.517	0.729126
MSX1	3.30026204117514e-05	-1.30539	0.004	0.01	0.73048
KIAA0232	3.32958422527264e-05	-0.122898	0.475	0.516	0.73697
GRIA2	3.33694764623994e-05	-0.12902	0.328	0.37	0.7386
GABBR2	3.35478677653172e-05	-0.238517	0.157	0.187	0.742549
ADCYAP1R1	3.39151594483867e-05	-0.693331	0.019	0.031	0.750678
IDH3A	3.41392104180842e-05	-0.351501	0.117	0.142	0.755637
CCNB1IP1	3.41936825109543e-05	-0.328248	0.105	0.13	0.756843
CAND1	3.46044000677384e-05	-0.20534	0.221	0.255	0.765934
ARAP2	3.483048175927e-05	0.200978	0.445	0.416	0.770938
GRIA1	3.50692486255927e-05	-0.216912	0.163	0.193	0.776223
IQCG	3.5091484218782e-05	-0.258809	0.171	0.201	0.776715
GATD1-DT	3.53270532556294e-05	-0.336911	0.082	0.104	0.781929
APOL6	3.53290931896819e-05	-0.321967	0.108	0.133	0.781974
LINC01375	3.56672145455825e-05	0.680028	0.061	0.043	0.789458
AVIL	3.56973669880465e-05	-0.291761	0.071	0.092	0.790126
LINC01115	3.60115895519329e-05	-1.38721	0.004	0.01	0.797081
ALDOC	3.66040327848767e-05	-0.508696	0.034	0.049	0.810194
AMPH	3.71401540477715e-05	-0.278251	0.119	0.145	0.82206
ADAMTSL4-AS2	3.74044742936873e-05	-0.374616	0.069	0.09	0.827911
ATP6V0A1	3.74589984752969e-05	0.185477	0.495	0.466	0.829117
HSP90AB1	3.78266430296008e-05	0.301684	0.383	0.355	0.837255
KBTBD8	3.79384129235881e-05	-0.59244	0.024	0.037	0.839729
A2M-AS1	3.79401785714597e-05	1.06629	0.022	0.011	0.839768
IL18	3.79500599498928e-05	0.142868	0.6	0.57	0.839987
RC3H2	3.7950156560543e-05	-0.171807	0.263	0.299	0.839989
ATP2B2	3.84399408125434e-05	-0.243616	0.12	0.147	0.85083
ZNF736	3.87360772145672e-05	-0.213581	0.257	0.291	0.857384
ATAD2B	3.88495035594204e-05	-0.120836	0.547	0.586	0.859895
PLEKHO1	3.94882710382998e-05	-0.178927	0.359	0.393	0.874033
SESN1	3.95462129341707e-05	0.191118	0.476	0.44	0.875316
CBWD1	3.97299116824459e-05	-0.191679	0.302	0.338	0.879382
TFEC	3.98073336513989e-05	-0.105046	0.562	0.602	0.881096
ZNF618	3.99900899658378e-05	0.247501	0.377	0.347	0.885141
PREX2	4.00037499207457e-05	-0.393445	0.034	0.049	0.885443
SORBS2	4.02206612828063e-05	-0.17317	0.188	0.22	0.890244
MYO9B	4.022820692834e-05	0.143247	0.765	0.745	0.890411
TTYH1	4.06934786100182e-05	-0.655576	0.029	0.042	0.900709
COTL1	4.09338141841735e-05	-0.103519	0.458	0.502	0.906029
FBH1	4.09904373220753e-05	-0.1806	0.285	0.32	0.907282
AGO2	4.10073895239349e-05	0.256662	0.257	0.225	0.907658
ABCG1	4.10279265515253e-05	-0.179295	0.211	0.245	0.908112
CALHM2	4.11731679713236e-05	-0.62093	0.03	0.044	0.911327
TRAP1	4.15493870888901e-05	-0.253327	0.179	0.209	0.919654
LPCAT4	4.17377706192728e-05	-0.364439	0.074	0.095	0.923824
DCLK1	4.19153150971214e-05	-0.146574	0.248	0.286	0.927754
TRIM9	4.19941212926649e-05	-0.19447	0.211	0.245	0.929498
TMEM135	4.22592135227967e-05	-0.153361	0.265	0.302	0.935365
SRRM1	4.23339141309168e-05	-0.159175	0.327	0.364	0.937019
STAU1	4.23538761580213e-05	-0.162552	0.36	0.395	0.937461
SLC37A2	4.2420596057244e-05	0.390774	0.125	0.1	0.938937
P4HA2	4.24367402587383e-05	1.0051	0.026	0.014	0.939295
NEDD4	4.25909540285979e-05	0.548198	0.083	0.063	0.942708
HLA-DQA2	4.26996330083567e-05	0.963816	0.022	0.011	0.945114
LRP5	4.29826615295983e-05	-0.756015	0.017	0.027	0.951378
ZNF827	4.31646026954833e-05	-0.43702	0.041	0.057	0.955405
SGK3	4.3748890284488e-05	0.160207	0.674	0.656	0.968338
PRKCQ	4.42593037065706e-05	0.477703	0.081	0.06	0.979635
KIF21A	4.43739346466234e-05	-0.389733	0.092	0.114	0.982173
LINC01845	4.49282837302091e-05	1.70784	0.012	0.004	0.994443
HIPK2	4.53162080720296e-05	-0.142958	0.433	0.472	1
NETO2	4.53774114645182e-05	-0.31653	0.132	0.158	1
PDIA6	4.54120861163024e-05	-0.204627	0.24	0.274	1
CAMK2B	4.55188775354562e-05	-0.256679	0.093	0.117	1
QARS1	4.5599926590922e-05	-0.372975	0.06	0.079	1
CALCR	4.56755091315944e-05	0.947814	0.026	0.014	1
CEP250-AS1	4.57593864856019e-05	-0.262942	0.19	0.221	1
OLA1	4.7357706179315e-05	-0.159136	0.437	0.469	1
ZBTB7A	4.74938311482307e-05	-0.188631	0.246	0.28	1
MYOF	4.76016382017381e-05	0.174708	0.547	0.52	1
PPIA	4.84752169603536e-05	-0.230789	0.198	0.229	1
CCDC85A	4.87237968901433e-05	-0.337978	0.083	0.104	1
VASP	4.89908078548079e-05	-0.247744	0.18	0.209	1
TMEM52B	4.90582395641339e-05	0.562865	0.046	0.03	1
ADGRE2	4.91000378242088e-05	-0.198765	0.283	0.317	1
UNC80	4.96724037739554e-05	-0.194421	0.151	0.18	1
RIPK1	4.96797034689376e-05	-0.199505	0.247	0.28	1
SNAPC1	4.96839980880992e-05	0.345015	0.106	0.083	1
LSG1	5.03858820540541e-05	-0.302497	0.115	0.141	1
LINC01176	5.05404323429991e-05	-0.171552	0.301	0.336	1
NIFK	5.10825374087479e-05	-0.398137	0.065	0.085	1
TMEM132D	5.15416723736333e-05	-0.149915	0.18	0.213	1
FRMPD4	5.22781050508365e-05	-0.150159	0.269	0.307	1
NISCH	5.25198986741288e-05	-0.205914	0.2	0.232	1
SLX4IP	5.26898431284774e-05	0.192634	0.395	0.364	1
MBP	5.27852530013118e-05	0.123908	0.737	0.717	1
TRABD	5.29995196562407e-05	-0.276877	0.18	0.208	1
HPN	5.30449189321421e-05	-0.368944	0.06	0.079	1
CDH23	5.30581870318904e-05	0.258481	0.278	0.246	1
URB1	5.32337769455715e-05	-0.279887	0.137	0.164	1
TCP1	5.34001263662782e-05	0.396832	0.132	0.106	1
AVEN	5.35140170279555e-05	-0.341941	0.131	0.157	1
KIAA1328	5.35469131322873e-05	-0.150666	0.411	0.447	1
EDNRB-AS1	5.35633048223919e-05	-0.429277	0.063	0.082	1
OLFML2B	5.36068180281635e-05	0.309719	0.226	0.195	1
WDR75	5.41309691114458e-05	-0.245997	0.172	0.201	1
SH3BP5-AS1	5.43438796620937e-05	-0.566297	0.028	0.042	1
RPL34	5.48072060803355e-05	-0.142031	0.289	0.326	1
APEX2	5.61139462138255e-05	-0.536693	0.028	0.041	1
ANKRD10	5.61193592794713e-05	0.189783	0.504	0.477	1
FIRRE	5.62006154650893e-05	0.245868	0.221	0.19	1
EFHB	5.6465746212377e-05	-0.687818	0.015	0.025	1
ADGRA3	5.64997882925219e-05	0.698297	0.039	0.025	1
FCHO2	5.65323032861274e-05	0.201386	0.421	0.383	1
GRIK1	5.69288367845938e-05	-0.111522	0.237	0.274	1
KDM3A	5.71527698135972e-05	-0.270154	0.293	0.323	1
SUSD3	5.72089148978115e-05	-0.208461	0.212	0.244	1
RPL32	5.74541933536326e-05	-0.161409	0.292	0.328	1
H2AW	5.77372949316472e-05	0.989767	0.032	0.019	1
LINC00477	5.77682227832681e-05	-1.11591	0.007	0.014	1
FUCA2	5.8207981083382e-05	-0.304211	0.128	0.153	1
ABL2	5.84406055409592e-05	-0.137518	0.448	0.484	1
RASSF5	5.87046280028073e-05	0.301495	0.184	0.155	1
CLIC1	5.87997848014266e-05	-0.303451	0.108	0.132	1
PDE11A	5.90779932533201e-05	-0.770935	0.012	0.021	1
HACE1	5.92896042027468e-05	-0.156443	0.319	0.354	1
ZNF654	5.93005628059572e-05	-0.201384	0.357	0.389	1
DNAH9	5.94064884522937e-05	-0.610872	0.028	0.042	1
CREB1	5.98074649896093e-05	0.147271	0.447	0.409	1
ARHGAP9	6.02548619432704e-05	-0.264874	0.132	0.158	1
HIF3A	6.03256439993549e-05	-0.537522	0.027	0.04	1
COX18	6.05983293232602e-05	-0.313781	0.098	0.121	1
AMDHD1	6.07361623438548e-05	1.63651	0.01	0.003	1
EHBP1L1	6.0904240203448e-05	-0.177416	0.313	0.347	1
PPM1G	6.10321787238322e-05	-0.301587	0.133	0.159	1
PCBD2	6.1073085841212e-05	-0.213747	0.213	0.245	1
LINC02698	6.1303741789365e-05	1.41872	0.015	0.006	1
ZNF711	6.20015842761818e-05	-0.416474	0.057	0.076	1
RNPEP	6.20213042074871e-05	-0.23481	0.176	0.205	1
SEM1	6.2496908206997e-05	0.341788	0.276	0.249	1
ZMYND8	6.27857002905676e-05	0.14015	0.522	0.49	1
PAQR7	6.28301648770042e-05	-0.406621	0.048	0.065	1
CDC123	6.29427180156346e-05	-0.202701	0.247	0.279	1
TUBGCP5	6.39841570775314e-05	-0.260121	0.154	0.182	1
SLC35D2	6.39868986023571e-05	0.32201	0.15	0.123	1
FBXO44	6.41028377672017e-05	-0.411854	0.064	0.084	1
GLUD1	6.41253659967221e-05	-0.207866	0.264	0.297	1
RBM4	6.44351579149539e-05	-0.21473	0.293	0.326	1
CHD4	6.4446603439313e-05	-0.19841	0.258	0.291	1
LINC01830	6.44472429655188e-05	-1.06628	0.005	0.011	1
NUDCD3	6.46403645454601e-05	-0.151597	0.402	0.436	1
MMS22L	6.47202668636099e-05	-0.240507	0.184	0.214	1
GNL3	6.50425106643116e-05	-0.237632	0.135	0.162	1
AKAP6	6.50792074153374e-05	-0.147252	0.246	0.281	1
MTHFS	6.55656326289823e-05	-0.259121	0.199	0.228	1
ZNF844	6.60147484175352e-05	0.675855	0.044	0.029	1
GALNT18	6.68988869389469e-05	-0.247765	0.09	0.113	1
B4GAT1	6.69835285746957e-05	-0.541675	0.034	0.049	1
POLR3E	6.70875636145236e-05	-0.326374	0.112	0.136	1
WDR77	6.7493534231084e-05	-0.375315	0.077	0.098	1
DPP8	6.7581379129345e-05	-0.155751	0.359	0.395	1
FAM9B	6.77258327326389e-05	-1.32038	0.005	0.012	1
RAP1GAP	6.89737487767345e-05	-0.404895	0.069	0.089	1
NRP2	6.93390773441955e-05	0.217013	0.338	0.304	1
C11orf80	6.93686247115975e-05	0.288817	0.16	0.133	1
FLCN	6.95627974448945e-05	0.251249	0.216	0.186	1
RNF125	6.96339759261533e-05	0.272448	0.236	0.206	1
HIBADH	7.06607071397266e-05	0.230886	0.265	0.232	1
CFAP221	7.11055274739512e-05	-0.631643	0.03	0.043	1
DLGAP1-AS1	7.13574307110878e-05	0.545473	0.048	0.032	1
CHST1	7.22382249342425e-05	-0.634306	0.027	0.039	1
GTF2I	7.26397971193718e-05	-0.1118	0.652	0.68	1
IVD	7.30157418355989e-05	-0.187213	0.282	0.316	1
RAB5C	7.4155785386242e-05	-0.245353	0.193	0.223	1
TESPA1	7.42119252308706e-05	-0.346662	0.048	0.065	1
FAM20A	7.45752961821591e-05	-0.162107	0.153	0.182	1
GPER1	7.49987546184421e-05	-0.933495	0.006	0.013	1
DISP1	7.51857135495799e-05	0.163219	0.676	0.659	1
HEATR1	7.53467415233472e-05	-0.220431	0.195	0.225	1
C11orf24	7.54490770766827e-05	-0.405091	0.058	0.076	1
MYBBP1A	7.64456839910036e-05	-0.449521	0.054	0.072	1
TENT4B	7.69623945395546e-05	0.231162	0.328	0.295	1
PRKAA1	7.78082345505595e-05	-0.252468	0.18	0.208	1
PINX1	7.86082622927725e-05	-0.24776	0.149	0.176	1
ENTPD4	7.87243458322779e-05	-0.264511	0.217	0.245	1
HMGA1	7.90037649225065e-05	-0.436484	0.052	0.069	1
ANK2-AS1	7.91838441000804e-05	0.501184	0.067	0.048	1
RFX7	7.95195949037014e-05	0.144786	0.456	0.419	1
UBL3	7.96897941905783e-05	0.168412	0.518	0.487	1
RNF187	7.98864355915483e-05	-0.453129	0.048	0.064	1
PFKFB4	7.99121880629212e-05	-0.302558	0.094	0.116	1
MRTO4	7.99769189206289e-05	-0.50212	0.04	0.056	1
ARHGAP26-IT1	8.04960760775679e-05	-0.885543	0.01	0.018	1
SRSF4	8.078990876933e-05	-0.127243	0.403	0.441	1
PNMA2	8.14462021900139e-05	-0.414885	0.05	0.067	1
EIF1B-AS1	8.16540037582973e-05	0.249901	0.245	0.214	1
RPS3	8.19049054906245e-05	-0.229589	0.325	0.355	1
SYCP3	8.26432128741708e-05	-0.475679	0.032	0.046	1
WASHC2A	8.31054604926795e-05	0.359697	0.108	0.085	1
YY1AP1	8.31087586705518e-05	-0.150955	0.318	0.354	1
EXOSC6	8.34916470495008e-05	-0.284205	0.098	0.121	1
TCP11L2	8.36094422428533e-05	-0.322122	0.086	0.108	1
ITPKC	8.38103842821131e-05	-0.34418	0.113	0.137	1
LINS1	8.40967430634901e-05	-0.306174	0.094	0.117	1
USP2-AS1	8.46129621269111e-05	-0.670674	0.017	0.028	1
GRHPR	8.47092754786029e-05	-0.348834	0.088	0.11	1
EEFSEC	8.52502879205927e-05	-0.150132	0.367	0.403	1
ZNF821	8.5318004976418e-05	-0.267914	0.095	0.118	1
RYR3	8.55834867598837e-05	-0.396137	0.073	0.093	1
STARD13-AS	8.56827794187511e-05	0.542513	0.08	0.06	1
ERP44	8.61973066196156e-05	-0.131219	0.472	0.509	1
TPBGL-AS1	8.64906610536397e-05	-0.551573	0.028	0.041	1
WDR4	8.65210757673887e-05	-0.283613	0.125	0.15	1
H2BC5	8.73430469462054e-05	0.431517	0.133	0.109	1
RPS29	8.79571192096415e-05	-0.172858	0.285	0.318	1
FBXW2	8.7969649162994e-05	-0.214493	0.195	0.224	1
DMD	8.81766357240344e-05	-0.102891	0.356	0.4	1
PAIP1	8.8239119805385e-05	-0.23421	0.137	0.163	1
GSAP	8.83113592378967e-05	0.184714	0.512	0.488	1
SCN3B	8.83493489989642e-05	-0.42233	0.05	0.067	1
XPR1	8.87896373226083e-05	0.166045	0.523	0.495	1
FBXO16	8.93488350825327e-05	-0.487804	0.04	0.056	1
REEP5	8.94624233633823e-05	-0.193894	0.225	0.257	1
SRFBP1	8.94845357926169e-05	-0.184124	0.255	0.288	1
PFN1	9.00290209055123e-05	-0.196756	0.184	0.214	1
PRKDC	9.02539219939205e-05	-0.133855	0.506	0.542	1
TAL1	9.04604236775016e-05	0.219002	0.33	0.299	1
SNX9	9.05431361629727e-05	0.226684	0.534	0.507	1
GAS2L3	9.08283788414308e-05	0.506779	0.069	0.051	1
UBALD2	9.08440041928928e-05	0.283165	0.112	0.089	1
KLF3	9.17742205098887e-05	-0.126497	0.375	0.412	1
BCAN	9.17851422056238e-05	-0.74818	0.015	0.024	1
ST6GALNAC5	9.23548155368961e-05	-0.133304	0.184	0.215	1
RALY	9.3332293600027e-05	-0.167044	0.379	0.41	1
CREBL2	9.34718479240487e-05	0.163944	0.366	0.331	1
SH3GLB1	9.37492303380504e-05	-0.16242	0.301	0.335	1
NPM1	9.41442429077227e-05	-0.236076	0.191	0.22	1
OLFML3	9.45562485346399e-05	-0.391903	0.063	0.081	1
PKHD1	9.46199835816139e-05	-1.03659	0.006	0.012	1
SMIM35	9.46359846947436e-05	-0.223623	0.163	0.192	1
PLA2G4A	9.52502468772328e-05	0.156363	0.566	0.535	1
TASL	9.52712547828543e-05	-0.226923	0.163	0.19	1
MYT1L	9.53907390483663e-05	-0.128893	0.232	0.266	1
[truncated: 3,384 more rows]
