# Supplementary material for: Microglial BIN1 deficiency elicits enhanced microglial inflammatory responses that mimic early AD pathology
Source: Research Square preprint supplement (doi:10.21203/rs.3.rs-7262443/v1), 2025-08-14
Supplement: Supplementary file 2 [file 2d6178e2b414609fe841c7a7.xlsx]

## Sheet: AD_MidvsLowBraak_vs_MG
Suppl.File 3: DEGs (log2FC>0.25 and p adj value<0.05) that constitute the intersect between DEGs in human microglia during the early stages of AD progression (mid vs low Braak stages) and DEGs found in our animal model after Bin1cKO and LPS administration (Bin1cKO + LPS vs Bin1cKO or Bin1fl/fll + LPS)
Gene
ABCA1
ACER3
ACTR2
ANK3
ARHGAP15
ARHGAP24
ARHGAP25
ARID5B
C1QA
C1QB
C1QC
CD83
CD86
CD9
CEPT1
CSF3R
CSMD1
CST3
CTNNA2
CTNND2
CTSB
CTSC
CTSS
CUX1
CX3CR1
DGLUCY
DRAM2
DTNBP1
ELMO1
EXOC4
EXOC6
FCGR2B
FGD2
FGD4
FGF14
FKBP5
FNDC3B
FTH1
GRID2
GRIK2
HK2
IFITM10
IFNAR2
IPCEF1
ITM2B
KCNMA1
LAT2
LRRK1
MACROD2
MALAT1
MIR100HG
MIR142HG
MIS18BP1
NAV3
NEGR1
NFIA
NLRC5
NRXN1
NRXN3
NUMB
OPRM1
PARP9
PBX3
PFKFB3
PHACTR1
PIK3AP1
PLP1
POU2F2
PRKCA
PRKCD
PROS1
PTMA
PTMS
PTPRD
RAD51B
RASSF3
RASSF4
RHOQ
RIPOR2
RORA
RPL3
RPSA
RUNX1
SAMHD1
SAT1
SCARB2
SIPA1L2
SLC6A6
SLC8A1
SNX30
SORL1
SP100
SRGAP2
SUSD6
TBC1D8
TGFBR1
TNKS2
UTY
WSB1
ZC3HAV1
ZEB2
ZFHX3
