# Supplementary material for: Microglial BIN1 deficiency elicits enhanced microglial inflammatory responses that mimic early AD pathology
Source: Research Square preprint supplement (doi:10.21203/rs.3.rs-7262443/v1), 2025-08-14
Supplement: Supplementary file 3 [file 5cc4c5bf31678961fa239a2f.xlsx]

## Sheet: DEGs
Suppl. File 1: DEGs (log2FC>0.25 and p adj value<0.05) found in all major brain cell types across all the different experimental comparisons
	gene	p_val	avg_log2FC	pct.1	pct.2	p_val_adj	cell_type	comparison
1	AC149090.1	2.61582e-45	1.15944	0.92	0.704	6.65622e-41	GluNeu	Bin1cKO_LPSvsBin1cKO_PBS
2	4930415C11Rik	1.00705e-14	1.58391	0.401	0.196	2.56254e-10	GluNeu	Bin1cKO_LPSvsBin1cKO_PBS
3	Kcnh7	1.20019e-09	-0.298207	0.953	0.976	3.054e-05	GluNeu	Bin1cKO_LPSvsBin1cKO_PBS
4	Gm40841	3.40932e-08	-0.607883	0.424	0.587	0.000867536	GluNeu	Bin1cKO_LPSvsBin1cKO_PBS
5	Pde10a	4.29065e-08	0.316291	0.963	0.976	0.0010918	GluNeu	Bin1cKO_LPSvsBin1cKO_PBS
6	Gm1992	1.56345e-07	-0.61261	0.337	0.502	0.00397835	GluNeu	Bin1cKO_LPSvsBin1cKO_PBS
7	Otud7a	7.61057e-07	0.250969	0.969	0.933	0.0193659	GluNeu	Bin1cKO_LPSvsBin1cKO_PBS
8	Abi3bp	1.02068e-06	-1.87138	0.086	0.187	0.0259722	GluNeu	Bin1cKO_LPSvsBin1cKO_PBS
9	Mgat4c	1.37384e-06	-0.607682	0.551	0.676	0.0349588	GluNeu	Bin1cKO_LPSvsBin1cKO_PBS
10	Tmem181a	1.65305e-06	-0.466792	0.497	0.622	0.0420635	GluNeu	Bin1cKO_LPSvsBin1cKO_PBS
11	AC149090.1	3.13123e-57	1.13609	0.896	0.648	7.96772e-53	GABANeu	Bin1cKO_LPSvsBin1cKO_PBS
12	Galnt17	1.57504e-08	0.749999	0.434	0.292	0.000400784	GABANeu	Bin1cKO_LPSvsBin1cKO_PBS
13	Snca	2.23087e-08	0.80708	0.316	0.186	0.000567667	GABANeu	Bin1cKO_LPSvsBin1cKO_PBS
14	Snhg11	2.31646e-08	0.366937	0.896	0.881	0.000589446	GABANeu	Bin1cKO_LPSvsBin1cKO_PBS
15	Slc2a13	1.57025e-07	0.402863	0.696	0.584	0.00399565	GABANeu	Bin1cKO_LPSvsBin1cKO_PBS
16	Ddx5	1.1659e-06	-0.454809	0.752	0.801	0.0296674	GABANeu	Bin1cKO_LPSvsBin1cKO_PBS
17	4930415C11Rik	1.28594e-06	1.026	0.249	0.151	0.032722	GABANeu	Bin1cKO_LPSvsBin1cKO_PBS
18	Stxbp6	1.72232e-06	-0.742178	0.198	0.306	0.0438261	GABANeu	Bin1cKO_LPSvsBin1cKO_PBS
19	AC149090.1	1.69002e-51	1.37302	0.657	0.321	4.30042e-47	Astro	Bin1cKO_LPSvsBin1cKO_PBS
20	Malat1	2.73261e-49	0.429395	1	1	6.9534e-45	Astro	Bin1cKO_LPSvsBin1cKO_PBS
21	Zbtb16	1.22753e-33	-1.29152	0.277	0.527	3.12358e-29	Astro	Bin1cKO_LPSvsBin1cKO_PBS
22	Anks1b	1.40082e-28	-0.682629	0.566	0.802	3.56452e-24	Astro	Bin1cKO_LPSvsBin1cKO_PBS
23	9330159F19Rik	2.92385e-22	-0.689606	0.638	0.785	7.44004e-18	Astro	Bin1cKO_LPSvsBin1cKO_PBS
24	Sfxn5	1.70179e-20	0.46266	0.919	0.832	4.33037e-16	Astro	Bin1cKO_LPSvsBin1cKO_PBS
25	Fgfr2	1.99744e-18	-0.371369	0.972	0.99	5.08268e-14	Astro	Bin1cKO_LPSvsBin1cKO_PBS
26	Zswim6	1.15859e-17	-0.924737	0.653	0.738	2.94814e-13	Astro	Bin1cKO_LPSvsBin1cKO_PBS
27	C4b	1.65418e-17	1.40694	0.256	0.103	4.20923e-13	Astro	Bin1cKO_LPSvsBin1cKO_PBS
28	Gpm6a	4.49878e-16	0.382244	0.945	0.877	1.14476e-11	Astro	Bin1cKO_LPSvsBin1cKO_PBS
29	2610035D17Rik	7.38686e-16	0.656791	0.602	0.414	1.87966e-11	Astro	Bin1cKO_LPSvsBin1cKO_PBS
30	Hmgn3	7.94567e-15	0.641895	0.546	0.364	2.02186e-10	Astro	Bin1cKO_LPSvsBin1cKO_PBS
31	Ptprz1	1.46976e-14	0.252027	0.991	0.986	3.73996e-10	Astro	Bin1cKO_LPSvsBin1cKO_PBS
32	Gfap	4.31062e-14	1.3476	0.235	0.103	1.09688e-09	Astro	Bin1cKO_LPSvsBin1cKO_PBS
33	Prnp	1.32999e-13	0.563173	0.653	0.488	3.38431e-09	Astro	Bin1cKO_LPSvsBin1cKO_PBS
34	Clu	2.3823e-13	0.533231	0.914	0.839	6.06199e-09	Astro	Bin1cKO_LPSvsBin1cKO_PBS
35	Tmem176a	3.11872e-13	1.28533	0.194	0.076	7.9359e-09	Astro	Bin1cKO_LPSvsBin1cKO_PBS
36	Pla2g7	3.40254e-13	0.445874	0.8	0.663	8.6581e-09	Astro	Bin1cKO_LPSvsBin1cKO_PBS
37	Sash1	6.20599e-13	0.469494	0.814	0.708	1.57918e-08	Astro	Bin1cKO_LPSvsBin1cKO_PBS
38	Arhgef10l	1.79238e-12	0.765966	0.446	0.293	4.5609e-08	Astro	Bin1cKO_LPSvsBin1cKO_PBS
39	Map4k4	2.0517e-12	0.543911	0.543	0.38	5.22077e-08	Astro	Bin1cKO_LPSvsBin1cKO_PBS
40	Cspg5	4.70865e-12	0.456876	0.849	0.748	1.19816e-07	Astro	Bin1cKO_LPSvsBin1cKO_PBS
41	Cd81	4.78089e-12	0.455931	0.77	0.651	1.21654e-07	Astro	Bin1cKO_LPSvsBin1cKO_PBS
42	Gm29683	4.88455e-12	1.94726	0.123	0.036	1.24292e-07	Astro	Bin1cKO_LPSvsBin1cKO_PBS
43	Gm3764	5.3932e-12	0.315703	0.951	0.903	1.37235e-07	Astro	Bin1cKO_LPSvsBin1cKO_PBS
44	Pde10a	6.37749e-12	-1.17077	0.309	0.435	1.62282e-07	Astro	Bin1cKO_LPSvsBin1cKO_PBS
45	Lrig1	9.11225e-12	0.807019	0.37	0.222	2.3187e-07	Astro	Bin1cKO_LPSvsBin1cKO_PBS
46	Slc7a11	1.0692e-11	0.504527	0.692	0.57	2.72069e-07	Astro	Bin1cKO_LPSvsBin1cKO_PBS
47	Kcnn2	1.31164e-11	-0.27344	0.96	0.974	3.33759e-07	Astro	Bin1cKO_LPSvsBin1cKO_PBS
48	Neat1	1.99526e-11	0.605655	0.546	0.401	5.07715e-07	Astro	Bin1cKO_LPSvsBin1cKO_PBS
49	Apoe	2.07022e-11	0.317787	0.999	0.99	5.26788e-07	Astro	Bin1cKO_LPSvsBin1cKO_PBS
50	Ifi27	3.20133e-11	1.32537	0.178	0.075	8.1461e-07	Astro	Bin1cKO_LPSvsBin1cKO_PBS
51	Pcyt2	3.31861e-11	-0.687294	0.376	0.508	8.44454e-07	Astro	Bin1cKO_LPSvsBin1cKO_PBS
52	Lgals3bp	3.53389e-11	1.88543	0.108	0.029	8.99233e-07	Astro	Bin1cKO_LPSvsBin1cKO_PBS
53	Ptprt	5.36681e-11	0.278975	0.959	0.94	1.36564e-06	Astro	Bin1cKO_LPSvsBin1cKO_PBS
54	Aldoc	6.88373e-11	0.492979	0.722	0.605	1.75164e-06	Astro	Bin1cKO_LPSvsBin1cKO_PBS
55	A330093E20Rik	9.4323e-11	-0.735455	0.335	0.467	2.40014e-06	Astro	Bin1cKO_LPSvsBin1cKO_PBS
56	Lhfp	9.52573e-11	-0.627577	0.607	0.693	2.42392e-06	Astro	Bin1cKO_LPSvsBin1cKO_PBS
57	Mgll	1.37311e-10	0.596671	0.654	0.524	3.49403e-06	Astro	Bin1cKO_LPSvsBin1cKO_PBS
58	Cpeb4	2.00616e-10	0.442741	0.712	0.587	5.10489e-06	Astro	Bin1cKO_LPSvsBin1cKO_PBS
59	Sox2	4.75354e-10	0.837164	0.277	0.155	1.20958e-05	Astro	Bin1cKO_LPSvsBin1cKO_PBS
60	Fth1	8.27591e-10	0.630705	0.42	0.278	2.10589e-05	Astro	Bin1cKO_LPSvsBin1cKO_PBS
61	Slc25a18	8.71879e-10	0.658742	0.355	0.225	2.21858e-05	Astro	Bin1cKO_LPSvsBin1cKO_PBS
62	Zfp608	8.98766e-10	0.430405	0.656	0.52	2.287e-05	Astro	Bin1cKO_LPSvsBin1cKO_PBS
63	Gpr37l1	9.74971e-10	0.38394	0.773	0.646	2.48091e-05	Astro	Bin1cKO_LPSvsBin1cKO_PBS
64	Gm40578	1.62923e-09	0.561498	0.494	0.367	4.14574e-05	Astro	Bin1cKO_LPSvsBin1cKO_PBS
65	Gpam	1.71532e-09	0.422907	0.697	0.567	4.36481e-05	Astro	Bin1cKO_LPSvsBin1cKO_PBS
66	Tsc22d3	3.04091e-09	-0.83823	0.234	0.352	7.73791e-05	Astro	Bin1cKO_LPSvsBin1cKO_PBS
67	Dlgap1	3.30405e-09	0.267741	0.915	0.851	8.40748e-05	Astro	Bin1cKO_LPSvsBin1cKO_PBS
68	Agt	3.32162e-09	1.35586	0.142	0.059	8.4522e-05	Astro	Bin1cKO_LPSvsBin1cKO_PBS
69	Sox6	6.8167e-09	0.283525	0.898	0.828	0.000173458	Astro	Bin1cKO_LPSvsBin1cKO_PBS
70	Crebrf	7.0866e-09	0.661359	0.335	0.213	0.000180326	Astro	Bin1cKO_LPSvsBin1cKO_PBS
71	Lgi4	7.19016e-09	0.624927	0.414	0.288	0.000182961	Astro	Bin1cKO_LPSvsBin1cKO_PBS
72	Hmgcr	1.24516e-08	-0.655324	0.31	0.425	0.000316843	Astro	Bin1cKO_LPSvsBin1cKO_PBS
73	Gm9925	1.97702e-08	0.443153	0.498	0.358	0.000503073	Astro	Bin1cKO_LPSvsBin1cKO_PBS
74	Ednrb	2.51877e-08	0.522142	0.515	0.39	0.000640927	Astro	Bin1cKO_LPSvsBin1cKO_PBS
75	Nebl	3.90574e-08	0.326908	0.839	0.749	0.000993855	Astro	Bin1cKO_LPSvsBin1cKO_PBS
76	Ptn	5.16163e-08	0.275174	0.892	0.835	0.00131343	Astro	Bin1cKO_LPSvsBin1cKO_PBS
77	Fnbp1	7.86061e-08	0.29703	0.815	0.724	0.00200021	Astro	Bin1cKO_LPSvsBin1cKO_PBS
78	Slc14a1	8.25376e-08	1.14101	0.144	0.067	0.00210025	Astro	Bin1cKO_LPSvsBin1cKO_PBS
79	Sox9	9.97669e-08	0.529502	0.421	0.302	0.00253867	Astro	Bin1cKO_LPSvsBin1cKO_PBS
80	Kcnd2	1.24792e-07	0.692688	0.457	0.347	0.00317545	Astro	Bin1cKO_LPSvsBin1cKO_PBS
81	Gramd1c	1.30343e-07	0.908044	0.148	0.07	0.00331672	Astro	Bin1cKO_LPSvsBin1cKO_PBS
82	Coq10b	1.53977e-07	-0.971011	0.146	0.239	0.00391811	Astro	Bin1cKO_LPSvsBin1cKO_PBS
83	Ntrk2	1.58434e-07	-0.336384	0.963	0.953	0.00403152	Astro	Bin1cKO_LPSvsBin1cKO_PBS
84	Igfbp5	1.58452e-07	0.452439	0.328	0.211	0.00403197	Astro	Bin1cKO_LPSvsBin1cKO_PBS
85	Sorcs2	1.769e-07	0.454189	0.538	0.421	0.00450139	Astro	Bin1cKO_LPSvsBin1cKO_PBS
86	Crebzf	2.31542e-07	0.882509	0.199	0.112	0.00589183	Astro	Bin1cKO_LPSvsBin1cKO_PBS
87	Leng9	2.42238e-07	0.521254	0.378	0.263	0.00616399	Astro	Bin1cKO_LPSvsBin1cKO_PBS
88	9630028H03Rik	2.68804e-07	0.578608	0.406	0.297	0.00683998	Astro	Bin1cKO_LPSvsBin1cKO_PBS
89	Atp1b2	2.96613e-07	0.380147	0.677	0.57	0.00754762	Astro	Bin1cKO_LPSvsBin1cKO_PBS
90	Phyhd1	3.76178e-07	0.81885	0.209	0.121	0.00957223	Astro	Bin1cKO_LPSvsBin1cKO_PBS
91	Celsr2	3.87185e-07	0.872089	0.172	0.091	0.00985232	Astro	Bin1cKO_LPSvsBin1cKO_PBS
92	S1pr1	3.90194e-07	0.288928	0.772	0.648	0.00992888	Astro	Bin1cKO_LPSvsBin1cKO_PBS
93	Gsap	4.51625e-07	0.514554	0.402	0.286	0.0114921	Astro	Bin1cKO_LPSvsBin1cKO_PBS
94	Mir9-3hg	5.0263e-07	0.439201	0.613	0.521	0.0127899	Astro	Bin1cKO_LPSvsBin1cKO_PBS
95	Nat8f1	5.08187e-07	0.745293	0.269	0.174	0.0129313	Astro	Bin1cKO_LPSvsBin1cKO_PBS
96	Rasa2	5.19213e-07	0.331059	0.654	0.551	0.0132119	Astro	Bin1cKO_LPSvsBin1cKO_PBS
97	Smim3	5.51147e-07	-0.806295	0.119	0.204	0.0140245	Astro	Bin1cKO_LPSvsBin1cKO_PBS
98	Rdh5	5.57322e-07	1.02128	0.139	0.067	0.0141816	Astro	Bin1cKO_LPSvsBin1cKO_PBS
99	Grk3	5.62716e-07	0.354405	0.702	0.621	0.0143189	Astro	Bin1cKO_LPSvsBin1cKO_PBS
100	Gm42418	6.56484e-07	0.339631	0.989	0.976	0.0167049	Astro	Bin1cKO_LPSvsBin1cKO_PBS
101	Cldn10	7.69294e-07	0.332664	0.594	0.465	0.0195755	Astro	Bin1cKO_LPSvsBin1cKO_PBS
102	Phlpp1	7.76141e-07	0.251332	0.895	0.803	0.0197497	Astro	Bin1cKO_LPSvsBin1cKO_PBS
103	Tlr3	8.30353e-07	0.610569	0.274	0.176	0.0211292	Astro	Bin1cKO_LPSvsBin1cKO_PBS
104	Abca1	8.59426e-07	0.350512	0.6	0.483	0.021869	Astro	Bin1cKO_LPSvsBin1cKO_PBS
105	Mapt	9.80171e-07	0.544854	0.347	0.242	0.0249414	Astro	Bin1cKO_LPSvsBin1cKO_PBS
106	Gm5089.1	9.89222e-07	0.724444	0.244	0.153	0.0251717	Astro	Bin1cKO_LPSvsBin1cKO_PBS
107	Extl3	1.05114e-06	0.458011	0.411	0.3	0.0267473	Astro	Bin1cKO_LPSvsBin1cKO_PBS
108	Lrp1	1.13576e-06	0.402006	0.513	0.403	0.0289005	Astro	Bin1cKO_LPSvsBin1cKO_PBS
109	Hspa5	1.14151e-06	0.533299	0.283	0.183	0.0290468	Astro	Bin1cKO_LPSvsBin1cKO_PBS
110	Rsrp1	1.16529e-06	0.34584	0.7	0.592	0.029652	Astro	Bin1cKO_LPSvsBin1cKO_PBS
111	2900052N01Rik	1.19527e-06	0.689699	0.279	0.184	0.0304148	Astro	Bin1cKO_LPSvsBin1cKO_PBS
112	Adra1a	1.29956e-06	0.482988	0.311	0.208	0.0330686	Astro	Bin1cKO_LPSvsBin1cKO_PBS
113	Arhgef19	1.43877e-06	0.43436	0.426	0.315	0.0366109	Astro	Bin1cKO_LPSvsBin1cKO_PBS
114	Dkk3	1.7738e-06	0.380142	0.436	0.32	0.0451362	Astro	Bin1cKO_LPSvsBin1cKO_PBS
115	Angpt1	1.79184e-06	0.701634	0.187	0.107	0.0455951	Astro	Bin1cKO_LPSvsBin1cKO_PBS
116	H2-K1	1.80777e-06	0.863153	0.196	0.115	0.0460005	Astro	Bin1cKO_LPSvsBin1cKO_PBS
117	Xpo1	1.85261e-06	-0.564583	0.309	0.404	0.0471414	Astro	Bin1cKO_LPSvsBin1cKO_PBS
118	Ptgds	1.01003e-109	1.67231	0.907	0.743	2.57012e-105	Oligo	Bin1cKO_LPSvsBin1cKO_PBS
119	Apod	4.08939e-99	1.7546	0.888	0.796	1.04059e-94	Oligo	Bin1cKO_LPSvsBin1cKO_PBS
120	Pex5l	2.34858e-63	-0.835533	0.824	0.934	5.97619e-59	Oligo	Bin1cKO_LPSvsBin1cKO_PBS
121	Zbtb16	1.20251e-50	-0.982885	0.492	0.7	3.05991e-46	Oligo	Bin1cKO_LPSvsBin1cKO_PBS
122	Npas3	2.7487e-49	-1.03584	0.436	0.661	6.99433e-45	Oligo	Bin1cKO_LPSvsBin1cKO_PBS
123	Gm37459	2.85273e-40	-0.985857	0.373	0.586	7.25905e-36	Oligo	Bin1cKO_LPSvsBin1cKO_PBS
124	Gm42418	6.71677e-38	0.608817	0.966	0.949	1.70915e-33	Oligo	Bin1cKO_LPSvsBin1cKO_PBS
125	4930419G24Rik	1.18309e-37	-0.827057	0.531	0.704	3.0105e-33	Oligo	Bin1cKO_LPSvsBin1cKO_PBS
126	Fth1	1.07354e-31	0.747271	0.929	0.884	2.73173e-27	Oligo	Bin1cKO_LPSvsBin1cKO_PBS
127	Mal	6.06678e-31	0.548397	0.925	0.868	1.54375e-26	Oligo	Bin1cKO_LPSvsBin1cKO_PBS
128	Ccser1	6.09278e-30	-1.03106	0.271	0.457	1.55037e-25	Oligo	Bin1cKO_LPSvsBin1cKO_PBS
129	Rsrp1	2.6564e-28	0.627726	0.709	0.538	6.75948e-24	Oligo	Bin1cKO_LPSvsBin1cKO_PBS
130	AY036118	6.86661e-28	0.627718	0.825	0.741	1.74728e-23	Oligo	Bin1cKO_LPSvsBin1cKO_PBS
131	Scd2	2.52759e-24	0.387245	0.966	0.961	6.43172e-20	Oligo	Bin1cKO_LPSvsBin1cKO_PBS
132	Hecw2	6.04692e-21	-0.345563	0.891	0.94	1.5387e-16	Oligo	Bin1cKO_LPSvsBin1cKO_PBS
133	Ptma	1.36107e-18	0.779884	0.503	0.364	3.46337e-14	Oligo	Bin1cKO_LPSvsBin1cKO_PBS
134	Elmo1	1.38562e-18	-0.326084	0.889	0.933	3.52585e-14	Oligo	Bin1cKO_LPSvsBin1cKO_PBS
135	Trf	1.05112e-17	0.359878	0.932	0.885	2.67468e-13	Oligo	Bin1cKO_LPSvsBin1cKO_PBS
136	Gsn	8.4916e-17	0.704098	0.441	0.291	2.16077e-12	Oligo	Bin1cKO_LPSvsBin1cKO_PBS
137	Erbin	1.52085e-16	0.38383	0.869	0.807	3.86995e-12	Oligo	Bin1cKO_LPSvsBin1cKO_PBS
138	Polr3e	5.90714e-15	-0.646192	0.392	0.506	1.50313e-10	Oligo	Bin1cKO_LPSvsBin1cKO_PBS
139	Tenm2	4.65086e-14	-1.11453	0.087	0.175	1.18346e-09	Oligo	Bin1cKO_LPSvsBin1cKO_PBS
140	Otud7a	4.91295e-14	-0.482335	0.592	0.689	1.25015e-09	Oligo	Bin1cKO_LPSvsBin1cKO_PBS
141	Gpm6b	5.25081e-14	-0.307699	0.881	0.906	1.33612e-09	Oligo	Bin1cKO_LPSvsBin1cKO_PBS
142	Unc5c	1.05919e-13	-0.327104	0.893	0.915	2.69522e-09	Oligo	Bin1cKO_LPSvsBin1cKO_PBS
143	Tle2	5.18693e-13	-1.35955	0.044	0.11	1.31987e-08	Oligo	Bin1cKO_LPSvsBin1cKO_PBS
144	AC149090.1	6.70282e-13	0.796068	0.337	0.223	1.7056e-08	Oligo	Bin1cKO_LPSvsBin1cKO_PBS
145	Klf13	7.63845e-13	0.46467	0.623	0.507	1.94368e-08	Oligo	Bin1cKO_LPSvsBin1cKO_PBS
146	Itm2b	2.24183e-12	0.430483	0.673	0.574	5.70456e-08	Oligo	Bin1cKO_LPSvsBin1cKO_PBS
147	Grm7	2.89585e-12	-0.822645	0.491	0.584	7.36877e-08	Oligo	Bin1cKO_LPSvsBin1cKO_PBS
148	Gm816	3.34068e-12	-1.36846	0.05	0.116	8.5007e-08	Oligo	Bin1cKO_LPSvsBin1cKO_PBS
149	Ddx5	3.94474e-12	0.31658	0.825	0.772	1.00378e-07	Oligo	Bin1cKO_LPSvsBin1cKO_PBS
150	A230001M10Rik	1.13595e-11	-0.567243	0.397	0.501	2.89053e-07	Oligo	Bin1cKO_LPSvsBin1cKO_PBS
151	Igsf11	1.21236e-11	-0.576629	0.334	0.442	3.08497e-07	Oligo	Bin1cKO_LPSvsBin1cKO_PBS
152	Lamc1	1.71646e-11	-0.954469	0.119	0.205	4.36769e-07	Oligo	Bin1cKO_LPSvsBin1cKO_PBS
153	Pgbd5	2.37852e-11	-1.01529	0.081	0.156	6.05239e-07	Oligo	Bin1cKO_LPSvsBin1cKO_PBS
154	Cldn11	3.89075e-11	0.333194	0.814	0.749	9.9004e-07	Oligo	Bin1cKO_LPSvsBin1cKO_PBS
155	Arnt2	5.59089e-11	-0.500649	0.341	0.447	1.42266e-06	Oligo	Bin1cKO_LPSvsBin1cKO_PBS
156	Sorcs3	6.11058e-11	-1.20534	0.086	0.159	1.5549e-06	Oligo	Bin1cKO_LPSvsBin1cKO_PBS
157	March1	1.20406e-10	-0.462389	0.563	0.634	3.06385e-06	Oligo	Bin1cKO_LPSvsBin1cKO_PBS
158	E330020D12Rik	1.43823e-10	-0.900268	0.166	0.253	3.65971e-06	Oligo	Bin1cKO_LPSvsBin1cKO_PBS
159	Grm3	1.81538e-10	-0.254374	0.892	0.925	4.61941e-06	Oligo	Bin1cKO_LPSvsBin1cKO_PBS
160	Kctd3	1.9563e-10	-0.495992	0.388	0.489	4.97799e-06	Oligo	Bin1cKO_LPSvsBin1cKO_PBS
161	Slc13a1	2.24367e-10	0.533935	0.387	0.275	5.70924e-06	Oligo	Bin1cKO_LPSvsBin1cKO_PBS
162	Csmd2	2.31396e-10	-1.00042	0.111	0.188	5.8881e-06	Oligo	Bin1cKO_LPSvsBin1cKO_PBS
163	Slc38a2	2.43909e-10	-0.483971	0.557	0.628	6.20651e-06	Oligo	Bin1cKO_LPSvsBin1cKO_PBS
164	Sgk1	2.48295e-10	-0.391898	0.572	0.667	6.31812e-06	Oligo	Bin1cKO_LPSvsBin1cKO_PBS
165	A330049N07Rik	3.35194e-10	-0.547677	0.371	0.473	8.52934e-06	Oligo	Bin1cKO_LPSvsBin1cKO_PBS
166	Cdc37l1	3.904e-10	-0.272168	0.853	0.858	9.93411e-06	Oligo	Bin1cKO_LPSvsBin1cKO_PBS
167	Auts2	4.29074e-10	-0.289126	0.797	0.867	1.09182e-05	Oligo	Bin1cKO_LPSvsBin1cKO_PBS
168	4930420G21Rik	5.08447e-10	-0.669238	0.295	0.386	1.2938e-05	Oligo	Bin1cKO_LPSvsBin1cKO_PBS
169	Ppia	5.67987e-10	0.738328	0.313	0.216	1.4453e-05	Oligo	Bin1cKO_LPSvsBin1cKO_PBS
170	Plxdc2	7.79253e-10	-0.261014	0.862	0.889	1.98289e-05	Oligo	Bin1cKO_LPSvsBin1cKO_PBS
171	Cerk	1.02927e-09	-0.605097	0.28	0.374	2.61907e-05	Oligo	Bin1cKO_LPSvsBin1cKO_PBS
172	Apoe	1.45661e-09	0.480944	0.611	0.512	3.70648e-05	Oligo	Bin1cKO_LPSvsBin1cKO_PBS
173	Cnp	1.6247e-09	0.451609	0.571	0.468	4.13421e-05	Oligo	Bin1cKO_LPSvsBin1cKO_PBS
174	Ppp1r14a	1.64257e-09	0.540653	0.438	0.337	4.17967e-05	Oligo	Bin1cKO_LPSvsBin1cKO_PBS
175	Glul	2.01483e-09	-0.568762	0.321	0.41	5.12695e-05	Oligo	Bin1cKO_LPSvsBin1cKO_PBS
176	Hspa5	2.82166e-09	0.862657	0.178	0.1	7.18e-05	Oligo	Bin1cKO_LPSvsBin1cKO_PBS
177	Creb5	3.39201e-09	0.408352	0.523	0.422	8.6313e-05	Oligo	Bin1cKO_LPSvsBin1cKO_PBS
178	Cdh19	3.44443e-09	-0.340702	0.655	0.716	8.76469e-05	Oligo	Bin1cKO_LPSvsBin1cKO_PBS
179	Neat1	3.56359e-09	0.263444	0.882	0.852	9.0679e-05	Oligo	Bin1cKO_LPSvsBin1cKO_PBS
180	Tbc1d5	5.01303e-09	-0.253196	0.869	0.907	0.000127562	Oligo	Bin1cKO_LPSvsBin1cKO_PBS
181	Dock1	8.18307e-09	-0.358431	0.562	0.64	0.000208226	Oligo	Bin1cKO_LPSvsBin1cKO_PBS
182	Hsp90b1	1.03131e-08	0.746066	0.252	0.168	0.000262426	Oligo	Bin1cKO_LPSvsBin1cKO_PBS
183	Ubc	1.31716e-08	0.696163	0.257	0.17	0.000335164	Oligo	Bin1cKO_LPSvsBin1cKO_PBS
184	9330159F19Rik	1.45646e-08	-0.461886	0.442	0.516	0.00037061	Oligo	Bin1cKO_LPSvsBin1cKO_PBS
185	Usp2	1.93811e-08	0.815714	0.197	0.12	0.000493173	Oligo	Bin1cKO_LPSvsBin1cKO_PBS
186	Dcc	2.03012e-08	-0.429985	0.352	0.451	0.000516584	Oligo	Bin1cKO_LPSvsBin1cKO_PBS
187	Mast3	2.3933e-08	-0.301721	0.758	0.777	0.000609	Oligo	Bin1cKO_LPSvsBin1cKO_PBS
188	Phyhipl	2.68895e-08	0.667193	0.235	0.152	0.000684231	Oligo	Bin1cKO_LPSvsBin1cKO_PBS
189	Pcdh15	3.04228e-08	-0.689388	0.232	0.314	0.000774139	Oligo	Bin1cKO_LPSvsBin1cKO_PBS
190	Piga	3.70111e-08	-0.785959	0.115	0.184	0.000941783	Oligo	Bin1cKO_LPSvsBin1cKO_PBS
191	Slc6a1	3.76805e-08	-0.488565	0.318	0.402	0.000958819	Oligo	Bin1cKO_LPSvsBin1cKO_PBS
192	Cd9	4.45269e-08	0.465252	0.487	0.401	0.00113303	Oligo	Bin1cKO_LPSvsBin1cKO_PBS
193	Tanc2	5.00144e-08	-0.509266	0.248	0.335	0.00127267	Oligo	Bin1cKO_LPSvsBin1cKO_PBS
194	Tmod2	5.13932e-08	-0.292457	0.75	0.78	0.00130775	Oligo	Bin1cKO_LPSvsBin1cKO_PBS
195	Rhoj	5.22992e-08	-0.906823	0.079	0.139	0.00133081	Oligo	Bin1cKO_LPSvsBin1cKO_PBS
196	Scd1	5.23354e-08	1.15527	0.113	0.055	0.00133173	Oligo	Bin1cKO_LPSvsBin1cKO_PBS
197	Cpox	7.21559e-08	0.500388	0.36	0.269	0.00183608	Oligo	Bin1cKO_LPSvsBin1cKO_PBS
198	Pakap	1.03853e-07	-0.324706	0.703	0.744	0.00264263	Oligo	Bin1cKO_LPSvsBin1cKO_PBS
199	Ikzf2	1.07647e-07	-0.524092	0.315	0.395	0.00273919	Oligo	Bin1cKO_LPSvsBin1cKO_PBS
200	Kirrel3	1.15321e-07	-0.514648	0.437	0.518	0.00293446	Oligo	Bin1cKO_LPSvsBin1cKO_PBS
201	Gpx4	1.27344e-07	0.763582	0.19	0.119	0.00324039	Oligo	Bin1cKO_LPSvsBin1cKO_PBS
202	Rhob	1.34692e-07	0.636148	0.222	0.145	0.00342737	Oligo	Bin1cKO_LPSvsBin1cKO_PBS
203	Msi2	1.38219e-07	-0.653859	0.119	0.187	0.00351712	Oligo	Bin1cKO_LPSvsBin1cKO_PBS
204	Reep5	1.44438e-07	0.298211	0.475	0.369	0.00367537	Oligo	Bin1cKO_LPSvsBin1cKO_PBS
205	Rora	1.62161e-07	-0.875465	0.066	0.12	0.00412634	Oligo	Bin1cKO_LPSvsBin1cKO_PBS
206	Appl2	1.65096e-07	-0.609119	0.225	0.301	0.00420102	Oligo	Bin1cKO_LPSvsBin1cKO_PBS
207	Kcnk13	2.10089e-07	0.345028	0.453	0.358	0.00534592	Oligo	Bin1cKO_LPSvsBin1cKO_PBS
208	Tmed10	2.26947e-07	0.549132	0.283	0.201	0.0057749	Oligo	Bin1cKO_LPSvsBin1cKO_PBS
209	Agpat4	2.38232e-07	0.314453	0.532	0.431	0.00606205	Oligo	Bin1cKO_LPSvsBin1cKO_PBS
210	Hsp90ab1	2.66466e-07	0.383619	0.463	0.365	0.0067805	Oligo	Bin1cKO_LPSvsBin1cKO_PBS
211	2810468N07Rik	2.87735e-07	0.496454	0.266	0.183	0.00732172	Oligo	Bin1cKO_LPSvsBin1cKO_PBS
212	Slc15a2	4.22743e-07	-0.572927	0.171	0.242	0.0107571	Oligo	Bin1cKO_LPSvsBin1cKO_PBS
213	Snx30	4.40372e-07	0.420735	0.446	0.355	0.0112057	Oligo	Bin1cKO_LPSvsBin1cKO_PBS
214	Cmss1	4.64506e-07	0.376948	0.42	0.325	0.0118198	Oligo	Bin1cKO_LPSvsBin1cKO_PBS
215	Arhgef10	5.8636e-07	0.251461	0.678	0.578	0.0149205	Oligo	Bin1cKO_LPSvsBin1cKO_PBS
216	Fryl	6.51064e-07	0.298593	0.675	0.603	0.016567	Oligo	Bin1cKO_LPSvsBin1cKO_PBS
217	Arap2	7.99481e-07	-0.406489	0.407	0.475	0.0203436	Oligo	Bin1cKO_LPSvsBin1cKO_PBS
218	Erbb4	8.04547e-07	-0.276495	0.86	0.872	0.0204725	Oligo	Bin1cKO_LPSvsBin1cKO_PBS
219	Nrxn1	8.2728e-07	-0.668717	0.089	0.145	0.021051	Oligo	Bin1cKO_LPSvsBin1cKO_PBS
220	Samd4	8.7977e-07	0.380888	0.408	0.317	0.0223866	Oligo	Bin1cKO_LPSvsBin1cKO_PBS
221	Clmn	9.19222e-07	-0.304112	0.563	0.624	0.0233905	Oligo	Bin1cKO_LPSvsBin1cKO_PBS
222	Sema6d	9.83981e-07	0.326428	0.521	0.43	0.0250384	Oligo	Bin1cKO_LPSvsBin1cKO_PBS
223	Adcy10	1.0338e-06	-1.023	0.057	0.103	0.0263062	Oligo	Bin1cKO_LPSvsBin1cKO_PBS
224	Lsamp	1.07471e-06	-0.291786	0.349	0.446	0.0273471	Oligo	Bin1cKO_LPSvsBin1cKO_PBS
225	Lrp4	1.08255e-06	-1.14399	0.06	0.106	0.0275466	Oligo	Bin1cKO_LPSvsBin1cKO_PBS
226	Map7d2	1.39259e-06	-0.436205	0.346	0.417	0.0354359	Oligo	Bin1cKO_LPSvsBin1cKO_PBS
227	Hcn2	1.4426e-06	-0.87653	0.085	0.138	0.0367083	Oligo	Bin1cKO_LPSvsBin1cKO_PBS
228	Spock3	1.47598e-06	-0.289341	0.409	0.498	0.0375577	Oligo	Bin1cKO_LPSvsBin1cKO_PBS
229	Abtb2	1.68265e-06	-0.575663	0.15	0.216	0.0428168	Oligo	Bin1cKO_LPSvsBin1cKO_PBS
230	Arhgap31	1.7971e-06	-0.630667	0.176	0.242	0.045729	Oligo	Bin1cKO_LPSvsBin1cKO_PBS
231	Schip1	1.90531e-06	0.27301	0.586	0.5	0.0484824	Oligo	Bin1cKO_LPSvsBin1cKO_PBS
232	Malat1	9.94016e-09	0.341368	1	1	0.000252937	OPCs	Bin1cKO_LPSvsBin1cKO_PBS
233	Crlf3	1.80852e-07	-1.13131	0.275	0.53	0.00460195	OPCs	Bin1cKO_LPSvsBin1cKO_PBS
234	Csmd3	1.35096e-48	-1.24973	0.877	0.957	3.43765e-44	Micro	Bin1cKO_LPSvsBin1cKO_PBS
235	Ctsl	1.10349e-38	1.80845	0.729	0.3	2.80793e-34	Micro	Bin1cKO_LPSvsBin1cKO_PBS
236	H2-D1	1.10577e-33	2.40805	0.545	0.135	2.81374e-29	Micro	Bin1cKO_LPSvsBin1cKO_PBS
237	H2-K1	6.591e-32	2.17398	0.53	0.122	1.67715e-27	Micro	Bin1cKO_LPSvsBin1cKO_PBS
238	Camk1d	6.35631e-31	0.935244	0.924	0.706	1.61743e-26	Micro	Bin1cKO_LPSvsBin1cKO_PBS
239	Gm26740	7.71737e-31	1.72713	0.611	0.205	1.96376e-26	Micro	Bin1cKO_LPSvsBin1cKO_PBS
240	Ptprc	9.19154e-30	0.91955	0.9	0.693	2.33888e-25	Micro	Bin1cKO_LPSvsBin1cKO_PBS
241	Ifi204	1.35449e-29	5.02756	0.349	0.013	3.44663e-25	Micro	Bin1cKO_LPSvsBin1cKO_PBS
242	Cst3	7.04791e-28	-0.732366	0.991	1	1.79341e-23	Micro	Bin1cKO_LPSvsBin1cKO_PBS
243	Lrmda	8.70792e-28	0.901962	0.934	0.838	2.21582e-23	Micro	Bin1cKO_LPSvsBin1cKO_PBS
244	Ctsz	1.86648e-27	1.34384	0.717	0.353	4.74944e-23	Micro	Bin1cKO_LPSvsBin1cKO_PBS
245	Itm2b	1.9533e-27	0.830307	0.955	0.726	4.97036e-23	Micro	Bin1cKO_LPSvsBin1cKO_PBS
246	Peli1	1.82727e-26	1.29198	0.738	0.409	4.64967e-22	Micro	Bin1cKO_LPSvsBin1cKO_PBS
247	Ppm1h	8.66022e-26	1.00881	0.88	0.614	2.20368e-21	Micro	Bin1cKO_LPSvsBin1cKO_PBS
248	Fyb	6.3127e-25	0.843398	0.95	0.822	1.60633e-20	Micro	Bin1cKO_LPSvsBin1cKO_PBS
249	Arid5b	3.34205e-24	1.74205	0.556	0.205	8.50417e-20	Micro	Bin1cKO_LPSvsBin1cKO_PBS
250	Plxdc2	3.49409e-24	-0.555647	0.968	0.98	8.89107e-20	Micro	Bin1cKO_LPSvsBin1cKO_PBS
251	AU020206	4.07032e-24	1.53677	0.626	0.314	1.03573e-19	Micro	Bin1cKO_LPSvsBin1cKO_PBS
252	Lacc1	3.01004e-23	1.7723	0.545	0.234	7.65936e-19	Micro	Bin1cKO_LPSvsBin1cKO_PBS
253	Cacna1d	6.73427e-23	1.08917	0.749	0.432	1.7136e-18	Micro	Bin1cKO_LPSvsBin1cKO_PBS
254	Ifi30	1.00169e-22	2.50604	0.378	0.076	2.5489e-18	Micro	Bin1cKO_LPSvsBin1cKO_PBS
255	B2m	1.23938e-22	1.43245	0.586	0.254	3.15373e-18	Micro	Bin1cKO_LPSvsBin1cKO_PBS
256	Elmo1	4.59682e-22	-0.510436	0.97	0.98	1.16971e-17	Micro	Bin1cKO_LPSvsBin1cKO_PBS
257	Ctsh	1.76698e-21	1.16378	0.702	0.399	4.49625e-17	Micro	Bin1cKO_LPSvsBin1cKO_PBS
258	Fth1	1.04472e-20	2.29616	0.363	0.076	2.6584e-16	Micro	Bin1cKO_LPSvsBin1cKO_PBS
259	Apobec3	3.05205e-20	1.65683	0.529	0.238	7.76625e-16	Micro	Bin1cKO_LPSvsBin1cKO_PBS
260	Abca1	1.10278e-19	0.979749	0.737	0.462	2.80614e-15	Micro	Bin1cKO_LPSvsBin1cKO_PBS
261	Nrxn1	1.2096e-19	-1.89303	0.076	0.284	3.07795e-15	Micro	Bin1cKO_LPSvsBin1cKO_PBS
262	Adgre1	2.55646e-19	1.49816	0.552	0.277	6.50516e-15	Micro	Bin1cKO_LPSvsBin1cKO_PBS
263	Auts2	9.84768e-19	-1.89668	0.072	0.271	2.50584e-14	Micro	Bin1cKO_LPSvsBin1cKO_PBS
264	Ctsc	1.15607e-18	1.42014	0.552	0.281	2.94174e-14	Micro	Bin1cKO_LPSvsBin1cKO_PBS
265	Dlg2	1.95614e-18	-1.74215	0.089	0.297	4.97758e-14	Micro	Bin1cKO_LPSvsBin1cKO_PBS
266	Mdga2	2.81499e-18	-1.74639	0.087	0.294	7.16302e-14	Micro	Bin1cKO_LPSvsBin1cKO_PBS
267	Csf3r	3.67179e-18	0.896835	0.808	0.571	9.34323e-14	Micro	Bin1cKO_LPSvsBin1cKO_PBS
268	Myo1f	7.06328e-18	0.826861	0.824	0.591	1.79732e-13	Micro	Bin1cKO_LPSvsBin1cKO_PBS
269	Il1rapl1	1.49456e-17	-1.91618	0.066	0.251	3.80305e-13	Micro	Bin1cKO_LPSvsBin1cKO_PBS
270	Nlgn1	1.61855e-17	-1.87518	0.07	0.257	4.11855e-13	Micro	Bin1cKO_LPSvsBin1cKO_PBS
271	Lrrc4c	2.25278e-17	-1.88233	0.069	0.254	5.73243e-13	Micro	Bin1cKO_LPSvsBin1cKO_PBS
272	Slc24a2	2.83804e-17	-1.93266	0.064	0.244	7.22166e-13	Micro	Bin1cKO_LPSvsBin1cKO_PBS
273	Ly6e	3.1003e-17	1.25343	0.565	0.284	7.88901e-13	Micro	Bin1cKO_LPSvsBin1cKO_PBS
274	Ptprd	3.9989e-17	-1.47467	0.123	0.343	1.01756e-12	Micro	Bin1cKO_LPSvsBin1cKO_PBS
275	Plek	4.06913e-17	1.47996	0.485	0.208	1.03543e-12	Micro	Bin1cKO_LPSvsBin1cKO_PBS
276	Fcgr2b	4.86258e-17	1.80517	0.388	0.129	1.23733e-12	Micro	Bin1cKO_LPSvsBin1cKO_PBS
277	Lsamp	5.47382e-17	-1.56125	0.107	0.317	1.39287e-12	Micro	Bin1cKO_LPSvsBin1cKO_PBS
278	Gm7480	5.98464e-17	1.8252	0.418	0.158	1.52285e-12	Micro	Bin1cKO_LPSvsBin1cKO_PBS
279	Epsti1	6.73462e-17	1.41037	0.565	0.297	1.71369e-12	Micro	Bin1cKO_LPSvsBin1cKO_PBS
280	Gm2245	7.59162e-17	0.938587	0.776	0.535	1.93176e-12	Micro	Bin1cKO_LPSvsBin1cKO_PBS
281	Lrp1b	8.80656e-17	-1.47608	0.121	0.337	2.24092e-12	Micro	Bin1cKO_LPSvsBin1cKO_PBS
282	Nkain2	1.19627e-16	-1.39179	0.142	0.366	3.04402e-12	Micro	Bin1cKO_LPSvsBin1cKO_PBS
283	Rassf3	1.45511e-16	1.90678	0.355	0.106	3.70268e-12	Micro	Bin1cKO_LPSvsBin1cKO_PBS
284	Magi2	1.54146e-16	-1.35659	0.15	0.376	3.9224e-12	Micro	Bin1cKO_LPSvsBin1cKO_PBS
285	A330040F15Rik	1.85666e-16	2.46756	0.299	0.066	4.72445e-12	Micro	Bin1cKO_LPSvsBin1cKO_PBS
286	Pcdh9	2.31783e-16	-1.29441	0.18	0.413	5.89796e-12	Micro	Bin1cKO_LPSvsBin1cKO_PBS
287	Aoah	2.66249e-16	4.04693	0.222	0.017	6.77496e-12	Micro	Bin1cKO_LPSvsBin1cKO_PBS
288	Lyn	2.9513e-16	0.601571	0.958	0.878	7.50987e-12	Micro	Bin1cKO_LPSvsBin1cKO_PBS
289	Cadm2	3.56568e-16	-1.49543	0.113	0.32	9.07324e-12	Micro	Bin1cKO_LPSvsBin1cKO_PBS
290	Abr	3.69351e-16	1.14271	0.519	0.234	9.39849e-12	Micro	Bin1cKO_LPSvsBin1cKO_PBS
291	Pvt1	3.99137e-16	1.19321	0.572	0.294	1.01564e-11	Micro	Bin1cKO_LPSvsBin1cKO_PBS
292	Pnpla7	5.23316e-16	0.753743	0.815	0.591	1.33163e-11	Micro	Bin1cKO_LPSvsBin1cKO_PBS
293	Trim30a	5.88316e-16	1.60389	0.496	0.248	1.49703e-11	Micro	Bin1cKO_LPSvsBin1cKO_PBS
294	Pik3ap1	6.36689e-16	1.04326	0.698	0.455	1.62012e-11	Micro	Bin1cKO_LPSvsBin1cKO_PBS
295	A830008E24Rik	1.21893e-15	1.12094	0.579	0.297	3.1017e-11	Micro	Bin1cKO_LPSvsBin1cKO_PBS
296	Tmeff2	1.27542e-15	-1.88971	0.061	0.228	3.24543e-11	Micro	Bin1cKO_LPSvsBin1cKO_PBS
297	Ntm	1.36243e-15	-2.27875	0.036	0.178	3.46683e-11	Micro	Bin1cKO_LPSvsBin1cKO_PBS
298	Pld4	4.73019e-15	0.86957	0.691	0.439	1.20364e-10	Micro	Bin1cKO_LPSvsBin1cKO_PBS
299	Dna2	5.04697e-15	4.64011	0.19	0.007	1.28425e-10	Micro	Bin1cKO_LPSvsBin1cKO_PBS
300	Lgals9	5.37827e-15	1.54776	0.413	0.168	1.36855e-10	Micro	Bin1cKO_LPSvsBin1cKO_PBS
301	Actb	9.57579e-15	1.16067	0.478	0.208	2.43666e-10	Micro	Bin1cKO_LPSvsBin1cKO_PBS
302	Stat1	9.73492e-15	2.17019	0.329	0.099	2.47715e-10	Micro	Bin1cKO_LPSvsBin1cKO_PBS
303	Lgals3bp	1.00275e-14	2.43899	0.258	0.05	2.5516e-10	Micro	Bin1cKO_LPSvsBin1cKO_PBS
304	Anapc15	1.07413e-14	1.81553	0.38	0.145	2.73322e-10	Micro	Bin1cKO_LPSvsBin1cKO_PBS
305	AY036118	1.35411e-14	0.715869	0.882	0.719	3.44566e-10	Micro	Bin1cKO_LPSvsBin1cKO_PBS
306	Tgfbr1	1.4343e-14	-0.558687	0.939	0.967	3.64973e-10	Micro	Bin1cKO_LPSvsBin1cKO_PBS
307	Ank3	1.45752e-14	-1.96616	0.051	0.201	3.70881e-10	Micro	Bin1cKO_LPSvsBin1cKO_PBS
308	Frmd5	1.65801e-14	-2.24674	0.035	0.168	4.21897e-10	Micro	Bin1cKO_LPSvsBin1cKO_PBS
309	Grik2	1.65801e-14	-2.24674	0.035	0.168	4.21897e-10	Micro	Bin1cKO_LPSvsBin1cKO_PBS
310	Ctnna3	1.65801e-14	-2.24674	0.035	0.168	4.21897e-10	Micro	Bin1cKO_LPSvsBin1cKO_PBS
311	Rnf213	1.80427e-14	1.84564	0.387	0.149	4.59116e-10	Micro	Bin1cKO_LPSvsBin1cKO_PBS
312	B3galt1	1.94956e-14	-1.97747	0.05	0.198	4.96086e-10	Micro	Bin1cKO_LPSvsBin1cKO_PBS
313	Grid2	1.94956e-14	-1.97747	0.05	0.198	4.96086e-10	Micro	Bin1cKO_LPSvsBin1cKO_PBS
314	Gpm6b	2.06323e-14	-2.26935	0.034	0.165	5.25009e-10	Micro	Bin1cKO_LPSvsBin1cKO_PBS
315	Pde4b	2.32707e-14	-1.37484	0.121	0.317	5.92147e-10	Micro	Bin1cKO_LPSvsBin1cKO_PBS
316	Rsrp1	2.63406e-14	0.685214	0.815	0.601	6.70263e-10	Micro	Bin1cKO_LPSvsBin1cKO_PBS
317	Fgf14	3.80085e-14	-2.34539	0.03	0.155	9.67164e-10	Micro	Bin1cKO_LPSvsBin1cKO_PBS
318	Taok3	3.90624e-14	0.994582	0.566	0.287	9.93981e-10	Micro	Bin1cKO_LPSvsBin1cKO_PBS
319	Phactr1	4.06225e-14	-2.19783	0.036	0.168	1.03368e-09	Micro	Bin1cKO_LPSvsBin1cKO_PBS
320	Ctss	5.23322e-14	0.515788	0.958	0.851	1.33165e-09	Micro	Bin1cKO_LPSvsBin1cKO_PBS
321	Lgmn	5.39674e-14	0.53768	0.933	0.792	1.37326e-09	Micro	Bin1cKO_LPSvsBin1cKO_PBS
322	Gab2	5.55175e-14	0.528442	0.935	0.835	1.4127e-09	Micro	Bin1cKO_LPSvsBin1cKO_PBS
323	Adgrb3	5.58952e-14	-1.95362	0.05	0.195	1.42231e-09	Micro	Bin1cKO_LPSvsBin1cKO_PBS
324	Ncam1	6.02728e-14	-2.02772	0.045	0.185	1.5337e-09	Micro	Bin1cKO_LPSvsBin1cKO_PBS
325	Eya4	6.7936e-14	2.08646	0.271	0.063	1.7287e-09	Micro	Bin1cKO_LPSvsBin1cKO_PBS
326	Nav3	7.01396e-14	-0.599185	0.839	0.901	1.78477e-09	Micro	Bin1cKO_LPSvsBin1cKO_PBS
327	Gm42047	7.05662e-14	4.01667	0.226	0.036	1.79563e-09	Micro	Bin1cKO_LPSvsBin1cKO_PBS
328	Ctnna2	7.18471e-14	-1.8497	0.057	0.208	1.82822e-09	Micro	Bin1cKO_LPSvsBin1cKO_PBS
329	Atrnl1	8.41334e-14	2.70563	0.202	0.02	2.14086e-09	Micro	Bin1cKO_LPSvsBin1cKO_PBS
330	Cotl1	9.13943e-14	1.40012	0.404	0.165	2.32562e-09	Micro	Bin1cKO_LPSvsBin1cKO_PBS
331	Negr1	9.79431e-14	-2.28881	0.031	0.155	2.49226e-09	Micro	Bin1cKO_LPSvsBin1cKO_PBS
332	Edil3	9.79431e-14	-2.28881	0.031	0.155	2.49226e-09	Micro	Bin1cKO_LPSvsBin1cKO_PBS
333	Oprm1	1.11096e-13	1.67272	0.315	0.089	2.82695e-09	Micro	Bin1cKO_LPSvsBin1cKO_PBS
334	Ncam2	1.19819e-13	-2.31502	0.03	0.152	3.04892e-09	Micro	Bin1cKO_LPSvsBin1cKO_PBS
335	Selplg	1.44361e-13	-0.605695	0.737	0.832	3.67342e-09	Micro	Bin1cKO_LPSvsBin1cKO_PBS
336	Mir100hg	1.74723e-13	-2.37258	0.027	0.145	4.446e-09	Micro	Bin1cKO_LPSvsBin1cKO_PBS
337	Rora	1.75003e-13	-2.08781	0.04	0.172	4.45314e-09	Micro	Bin1cKO_LPSvsBin1cKO_PBS
338	Grm3	1.96142e-13	-2.21164	0.034	0.158	4.99102e-09	Micro	Bin1cKO_LPSvsBin1cKO_PBS
339	Plp1	2.44943e-13	-2.43823	0.025	0.139	6.23282e-09	Micro	Bin1cKO_LPSvsBin1cKO_PBS
340	Csf2ra	2.47087e-13	1.4061	0.378	0.142	6.28736e-09	Micro	Bin1cKO_LPSvsBin1cKO_PBS
341	Pou2f2	2.502e-13	0.817045	0.685	0.436	6.3666e-09	Micro	Bin1cKO_LPSvsBin1cKO_PBS
342	Cd52	2.68936e-13	2.85624	0.216	0.033	6.84336e-09	Micro	Bin1cKO_LPSvsBin1cKO_PBS
343	Arhgap25	2.78123e-13	1.06702	0.515	0.271	7.07713e-09	Micro	Bin1cKO_LPSvsBin1cKO_PBS
344	Irak2	2.88014e-13	0.897145	0.642	0.399	7.32881e-09	Micro	Bin1cKO_LPSvsBin1cKO_PBS
345	Arhgap24	2.95016e-13	1.43402	0.419	0.185	7.50698e-09	Micro	Bin1cKO_LPSvsBin1cKO_PBS
346	Ctsb	3.95459e-13	0.815885	0.627	0.366	1.00628e-08	Micro	Bin1cKO_LPSvsBin1cKO_PBS
347	Cenpf	4.2759e-13	4.43492	0.173	0.01	1.08805e-08	Micro	Bin1cKO_LPSvsBin1cKO_PBS
348	Blnk	6.06595e-13	0.711513	0.743	0.492	1.54354e-08	Micro	Bin1cKO_LPSvsBin1cKO_PBS
349	Gria2	6.61907e-13	-2.37112	0.026	0.139	1.68429e-08	Micro	Bin1cKO_LPSvsBin1cKO_PBS
350	Grn	6.68934e-13	0.931765	0.595	0.353	1.70217e-08	Micro	Bin1cKO_LPSvsBin1cKO_PBS
351	P2rx4	6.93453e-13	1.30621	0.406	0.172	1.76456e-08	Micro	Bin1cKO_LPSvsBin1cKO_PBS
352	Nrxn3	7.85428e-13	-2.40428	0.025	0.135	1.9986e-08	Micro	Bin1cKO_LPSvsBin1cKO_PBS
353	Ube2e2	8.88888e-13	-2.54179	0.024	0.132	2.26187e-08	Micro	Bin1cKO_LPSvsBin1cKO_PBS
354	Ddx60	1.00571e-12	2.53306	0.272	0.079	2.55912e-08	Micro	Bin1cKO_LPSvsBin1cKO_PBS
355	Fnip1	1.24743e-12	0.694757	0.66	0.399	3.1742e-08	Micro	Bin1cKO_LPSvsBin1cKO_PBS
356	Knl1	1.43326e-12	6.86718	0.148	0	3.64706e-08	Micro	Bin1cKO_LPSvsBin1cKO_PBS
357	Top2a	1.78714e-12	6.39662	0.153	0.003	4.54755e-08	Micro	Bin1cKO_LPSvsBin1cKO_PBS
358	Prkcd	1.95995e-12	0.751947	0.678	0.419	4.98729e-08	Micro	Bin1cKO_LPSvsBin1cKO_PBS
359	Mthfs	2.40987e-12	1.01679	0.496	0.244	6.13216e-08	Micro	Bin1cKO_LPSvsBin1cKO_PBS
360	Ctnnd2	2.96534e-12	-1.93153	0.037	0.158	7.54559e-08	Micro	Bin1cKO_LPSvsBin1cKO_PBS
361	Saa3	3.60125e-12	6.01638	0.156	0.007	9.16374e-08	Micro	Bin1cKO_LPSvsBin1cKO_PBS
362	Slc8a1	6.37258e-12	-0.474935	0.926	0.98	1.62157e-07	Micro	Bin1cKO_LPSvsBin1cKO_PBS
363	Igsf6	7.13406e-12	1.92298	0.247	0.063	1.81533e-07	Micro	Bin1cKO_LPSvsBin1cKO_PBS
364	Naip5	7.38415e-12	1.23792	0.406	0.188	1.87897e-07	Micro	Bin1cKO_LPSvsBin1cKO_PBS
365	Ipcef1	7.46991e-12	1.64689	0.288	0.089	1.90079e-07	Micro	Bin1cKO_LPSvsBin1cKO_PBS
366	Malat1	8.46695e-12	-0.35811	0.999	1	2.1545e-07	Micro	Bin1cKO_LPSvsBin1cKO_PBS
367	Frrs1	8.72768e-12	1.00265	0.525	0.3	2.22084e-07	Micro	Bin1cKO_LPSvsBin1cKO_PBS
368	Diaph3	9.97251e-12	5.11928	0.151	0.007	2.53761e-07	Micro	Bin1cKO_LPSvsBin1cKO_PBS
369	Eif2ak2	1.03198e-11	1.99565	0.293	0.102	2.62597e-07	Micro	Bin1cKO_LPSvsBin1cKO_PBS
370	Pid1	1.08249e-11	0.585768	0.833	0.634	2.7545e-07	Micro	Bin1cKO_LPSvsBin1cKO_PBS
371	Neat1	1.15018e-11	1.73867	0.263	0.073	2.92675e-07	Micro	Bin1cKO_LPSvsBin1cKO_PBS
372	Lcorl	1.15691e-11	1.05693	0.554	0.327	2.94388e-07	Micro	Bin1cKO_LPSvsBin1cKO_PBS
373	Cpd	1.21156e-11	2.12969	0.222	0.046	3.08295e-07	Micro	Bin1cKO_LPSvsBin1cKO_PBS
374	Maml3	1.31585e-11	-0.593016	0.794	0.858	3.34832e-07	Micro	Bin1cKO_LPSvsBin1cKO_PBS
375	Ccnl1	1.34401e-11	0.893565	0.498	0.248	3.41996e-07	Micro	Bin1cKO_LPSvsBin1cKO_PBS
376	Vmp1	1.35301e-11	2.24597	0.201	0.033	3.44288e-07	Micro	Bin1cKO_LPSvsBin1cKO_PBS
377	Cenpe	1.50884e-11	6.07145	0.136	0	3.8394e-07	Micro	Bin1cKO_LPSvsBin1cKO_PBS
378	Fkbp5	1.54277e-11	-0.826608	0.616	0.713	3.92574e-07	Micro	Bin1cKO_LPSvsBin1cKO_PBS
379	Olfr56	1.80737e-11	0.983763	0.519	0.304	4.59902e-07	Micro	Bin1cKO_LPSvsBin1cKO_PBS
380	Zc3hav1	2.08527e-11	1.25755	0.36	0.155	5.30617e-07	Micro	Bin1cKO_LPSvsBin1cKO_PBS
381	Cux1	2.17574e-11	0.674622	0.733	0.488	5.5364e-07	Micro	Bin1cKO_LPSvsBin1cKO_PBS
382	Clec4a3	2.54779e-11	1.64011	0.308	0.116	6.48311e-07	Micro	Bin1cKO_LPSvsBin1cKO_PBS
383	Arl6ip1	2.55e-11	1.89584	0.274	0.089	6.48873e-07	Micro	Bin1cKO_LPSvsBin1cKO_PBS
384	Gm13710	2.58281e-11	1.51269	0.38	0.182	6.57221e-07	Micro	Bin1cKO_LPSvsBin1cKO_PBS
385	Arl5c	2.67396e-11	3.17062	0.165	0.017	6.80416e-07	Micro	Bin1cKO_LPSvsBin1cKO_PBS
386	Sp100	2.80233e-11	2.059	0.279	0.096	7.13081e-07	Micro	Bin1cKO_LPSvsBin1cKO_PBS
387	Naip2	2.9631e-11	1.30267	0.397	0.195	7.53991e-07	Micro	Bin1cKO_LPSvsBin1cKO_PBS
388	Prc1	3.10181e-11	6.76062	0.132	0	7.89288e-07	Micro	Bin1cKO_LPSvsBin1cKO_PBS
389	Cep128	3.95552e-11	3.0428	0.185	0.03	1.00652e-06	Micro	Bin1cKO_LPSvsBin1cKO_PBS
390	Kif11	4.11612e-11	5.21777	0.137	0.003	1.04739e-06	Micro	Bin1cKO_LPSvsBin1cKO_PBS
391	Cenpa	4.22191e-11	4.61808	0.143	0.007	1.07431e-06	Micro	Bin1cKO_LPSvsBin1cKO_PBS
392	Gm40645	5.08721e-11	1.20325	0.375	0.168	1.29449e-06	Micro	Bin1cKO_LPSvsBin1cKO_PBS
393	Sat1	6.02674e-11	0.730875	0.721	0.518	1.53356e-06	Micro	Bin1cKO_LPSvsBin1cKO_PBS
394	Etnk1	6.12158e-11	1.33268	0.304	0.106	1.5577e-06	Micro	Bin1cKO_LPSvsBin1cKO_PBS
395	Sorl1	6.18852e-11	1.45772	0.248	0.066	1.57473e-06	Micro	Bin1cKO_LPSvsBin1cKO_PBS
396	Numb	7.0153e-11	-0.659149	0.743	0.792	1.78511e-06	Micro	Bin1cKO_LPSvsBin1cKO_PBS
397	Acer3	7.18916e-11	0.89107	0.602	0.386	1.82935e-06	Micro	Bin1cKO_LPSvsBin1cKO_PBS
398	Oasl2	7.64927e-11	5.80517	0.127	0	1.94643e-06	Micro	Bin1cKO_LPSvsBin1cKO_PBS
399	Lockd	8.22158e-11	5.52053	0.133	0.003	2.09206e-06	Micro	Bin1cKO_LPSvsBin1cKO_PBS
400	Nlrc5	8.37487e-11	2.81811	0.171	0.023	2.13107e-06	Micro	Bin1cKO_LPSvsBin1cKO_PBS
401	Gm26917	9.89189e-11	1.30198	0.313	0.116	2.51709e-06	Micro	Bin1cKO_LPSvsBin1cKO_PBS
402	Cd63	1.01769e-10	1.38579	0.282	0.092	2.58962e-06	Micro	Bin1cKO_LPSvsBin1cKO_PBS
403	Rbms1	1.0509e-10	1.87729	0.232	0.063	2.67413e-06	Micro	Bin1cKO_LPSvsBin1cKO_PBS
404	Cd84	1.07713e-10	0.797073	0.615	0.429	2.74087e-06	Micro	Bin1cKO_LPSvsBin1cKO_PBS
405	Tpd52	1.09297e-10	1.11864	0.409	0.198	2.78116e-06	Micro	Bin1cKO_LPSvsBin1cKO_PBS
406	Dnajc13	1.37038e-10	0.798083	0.546	0.307	3.48706e-06	Micro	Bin1cKO_LPSvsBin1cKO_PBS
407	Myo9a	1.53332e-10	0.615479	0.636	0.38	3.9017e-06	Micro	Bin1cKO_LPSvsBin1cKO_PBS
408	Stard9	1.59061e-10	0.69602	0.63	0.389	4.04746e-06	Micro	Bin1cKO_LPSvsBin1cKO_PBS
409	Rpsa	1.8312e-10	2.01795	0.224	0.059	4.65966e-06	Micro	Bin1cKO_LPSvsBin1cKO_PBS
410	Parp14	2.1862e-10	1.70777	0.35	0.165	5.56301e-06	Micro	Bin1cKO_LPSvsBin1cKO_PBS
411	Kif23	2.48302e-10	5.9086	0.121	0	6.3183e-06	Micro	Bin1cKO_LPSvsBin1cKO_PBS
412	Srgap2	2.57793e-10	-0.383706	0.975	0.967	6.55981e-06	Micro	Bin1cKO_LPSvsBin1cKO_PBS
413	Smc4	3.04106e-10	3.22619	0.167	0.026	7.73828e-06	Micro	Bin1cKO_LPSvsBin1cKO_PBS
414	Arhgap15	3.05357e-10	0.536081	0.246	0.069	7.77011e-06	Micro	Bin1cKO_LPSvsBin1cKO_PBS
415	Cit	3.30655e-10	5.23957	0.126	0.003	8.41384e-06	Micro	Bin1cKO_LPSvsBin1cKO_PBS
416	Macrod2	3.31838e-10	-2.28564	0.022	0.112	8.44394e-06	Micro	Bin1cKO_LPSvsBin1cKO_PBS
417	Csmd1	3.31838e-10	-2.28564	0.022	0.112	8.44394e-06	Micro	Bin1cKO_LPSvsBin1cKO_PBS
418	Lpcat2	3.48461e-10	0.50235	0.901	0.749	8.86694e-06	Micro	Bin1cKO_LPSvsBin1cKO_PBS
419	Plcg2	3.54568e-10	0.716345	0.606	0.396	9.02235e-06	Micro	Bin1cKO_LPSvsBin1cKO_PBS
420	Parp9	4.0973e-10	1.47404	0.313	0.129	1.0426e-05	Micro	Bin1cKO_LPSvsBin1cKO_PBS
421	Mki67	4.13533e-10	5.42861	0.125	0.003	1.05227e-05	Micro	Bin1cKO_LPSvsBin1cKO_PBS
422	Dclre1c	4.58218e-10	1.10949	0.387	0.185	1.16598e-05	Micro	Bin1cKO_LPSvsBin1cKO_PBS
423	Fam111a	4.78764e-10	1.9073	0.244	0.079	1.21826e-05	Micro	Bin1cKO_LPSvsBin1cKO_PBS
424	Cd300c2	4.85879e-10	0.865176	0.517	0.304	1.23637e-05	Micro	Bin1cKO_LPSvsBin1cKO_PBS
425	Vav2	5.32005e-10	1.08792	0.424	0.231	1.35374e-05	Micro	Bin1cKO_LPSvsBin1cKO_PBS
426	Ifnar2	6.08206e-10	0.944653	0.469	0.267	1.54764e-05	Micro	Bin1cKO_LPSvsBin1cKO_PBS
427	A930037H05Rik	7.49093e-10	1.8002	0.286	0.112	1.90614e-05	Micro	Bin1cKO_LPSvsBin1cKO_PBS
428	Rab27a	7.50849e-10	1.56841	0.282	0.109	1.91061e-05	Micro	Bin1cKO_LPSvsBin1cKO_PBS
429	Tbc1d8	7.85875e-10	1.06789	0.362	0.165	1.99974e-05	Micro	Bin1cKO_LPSvsBin1cKO_PBS
430	Ckap5	8.16927e-10	1.62166	0.3	0.125	2.07875e-05	Micro	Bin1cKO_LPSvsBin1cKO_PBS
431	Npc2	8.22047e-10	1.0292	0.419	0.218	2.09178e-05	Micro	Bin1cKO_LPSvsBin1cKO_PBS
432	Cenpc1	8.81158e-10	2.70614	0.168	0.03	2.24219e-05	Micro	Bin1cKO_LPSvsBin1cKO_PBS
433	Zmynd8	9.29437e-10	0.935848	0.441	0.224	2.36505e-05	Micro	Bin1cKO_LPSvsBin1cKO_PBS
434	H2-Q4	9.62189e-10	3.39013	0.133	0.01	2.44839e-05	Micro	Bin1cKO_LPSvsBin1cKO_PBS
435	Ifi207	1.00143e-09	3.32364	0.14	0.013	2.54823e-05	Micro	Bin1cKO_LPSvsBin1cKO_PBS
436	Gnao1	1.00724e-09	-2.24382	0.022	0.109	2.56304e-05	Micro	Bin1cKO_LPSvsBin1cKO_PBS
437	Efcab11	1.06477e-09	4.55765	0.126	0.007	2.70941e-05	Micro	Bin1cKO_LPSvsBin1cKO_PBS
438	Clec2d	1.22246e-09	2.08568	0.19	0.043	3.11067e-05	Micro	Bin1cKO_LPSvsBin1cKO_PBS
439	Fbrsl1	1.25908e-09	0.830057	0.478	0.257	3.20385e-05	Micro	Bin1cKO_LPSvsBin1cKO_PBS
440	Rad51b	1.2728e-09	1.62956	0.323	0.142	3.23878e-05	Micro	Bin1cKO_LPSvsBin1cKO_PBS
441	Ccnf	1.53799e-09	5.51458	0.111	0	3.91357e-05	Micro	Bin1cKO_LPSvsBin1cKO_PBS
442	Dglucy	1.57661e-09	1.3354	0.296	0.122	4.01185e-05	Micro	Bin1cKO_LPSvsBin1cKO_PBS
443	C2cd5	1.79911e-09	2.41884	0.166	0.03	4.57801e-05	Micro	Bin1cKO_LPSvsBin1cKO_PBS
444	Otulinl	1.85805e-09	0.487165	0.847	0.7	4.72799e-05	Micro	Bin1cKO_LPSvsBin1cKO_PBS
445	Atp6v0c	1.97751e-09	1.25868	0.333	0.152	5.03197e-05	Micro	Bin1cKO_LPSvsBin1cKO_PBS
446	Ect2	2.14517e-09	4.6618	0.116	0.003	5.4586e-05	Micro	Bin1cKO_LPSvsBin1cKO_PBS
447	Nlrp1b	2.24833e-09	0.865555	0.494	0.304	5.7211e-05	Micro	Bin1cKO_LPSvsBin1cKO_PBS
448	Bst2	2.41996e-09	2.11029	0.185	0.043	6.15783e-05	Micro	Bin1cKO_LPSvsBin1cKO_PBS
449	Sipa1l2	2.53486e-09	0.64615	0.623	0.409	6.4502e-05	Micro	Bin1cKO_LPSvsBin1cKO_PBS
450	Lhfpl2	2.62706e-09	0.653819	0.68	0.482	6.68482e-05	Micro	Bin1cKO_LPSvsBin1cKO_PBS
451	Fermt3	2.72975e-09	0.685353	0.585	0.383	6.94612e-05	Micro	Bin1cKO_LPSvsBin1cKO_PBS
452	Fgd2	3.04611e-09	0.572311	0.774	0.604	7.75112e-05	Micro	Bin1cKO_LPSvsBin1cKO_PBS
453	Exoc6	3.20576e-09	0.995519	0.435	0.241	8.15738e-05	Micro	Bin1cKO_LPSvsBin1cKO_PBS
454	Tyrobp	3.39188e-09	0.903383	0.489	0.31	8.63097e-05	Micro	Bin1cKO_LPSvsBin1cKO_PBS
455	Ncoa1	3.55453e-09	1.02867	0.32	0.135	9.04486e-05	Micro	Bin1cKO_LPSvsBin1cKO_PBS
456	Prune2	3.72183e-09	1.34669	0.239	0.079	9.47057e-05	Micro	Bin1cKO_LPSvsBin1cKO_PBS
457	Gm17106	3.99417e-09	0.747025	0.478	0.254	0.000101636	Micro	Bin1cKO_LPSvsBin1cKO_PBS
458	Kif15	4.05775e-09	3.54991	0.142	0.02	0.000103253	Micro	Bin1cKO_LPSvsBin1cKO_PBS
459	H3f3b	4.07283e-09	1.02247	0.312	0.125	0.000103637	Micro	Bin1cKO_LPSvsBin1cKO_PBS
460	Nusap1	4.24265e-09	4.60321	0.118	0.007	0.000107958	Micro	Bin1cKO_LPSvsBin1cKO_PBS
461	Lrrk1	4.33401e-09	0.650481	0.627	0.416	0.000110283	Micro	Bin1cKO_LPSvsBin1cKO_PBS
462	Gusb	4.48327e-09	1.10499	0.375	0.195	0.000114081	Micro	Bin1cKO_LPSvsBin1cKO_PBS
463	Cenpp	4.51844e-09	2.80361	0.197	0.056	0.000114976	Micro	Bin1cKO_LPSvsBin1cKO_PBS
464	Nav2	4.63066e-09	-0.429122	0.903	0.957	0.000117832	Micro	Bin1cKO_LPSvsBin1cKO_PBS
465	Havcr2	4.63738e-09	0.639245	0.633	0.439	0.000118003	Micro	Bin1cKO_LPSvsBin1cKO_PBS
466	Ndc80	4.79285e-09	5.47836	0.105	0	0.000121959	Micro	Bin1cKO_LPSvsBin1cKO_PBS
467	Pirb	5.10863e-09	2.30721	0.16	0.03	0.000129994	Micro	Bin1cKO_LPSvsBin1cKO_PBS
468	Lamp2	5.10924e-09	0.720178	0.539	0.327	0.00013001	Micro	Bin1cKO_LPSvsBin1cKO_PBS
469	Tcirg1	5.21967e-09	0.961145	0.434	0.251	0.00013282	Micro	Bin1cKO_LPSvsBin1cKO_PBS
470	Capn3	5.29518e-09	0.726372	0.62	0.446	0.000134741	Micro	Bin1cKO_LPSvsBin1cKO_PBS
471	Rassf4	5.6124e-09	1.23043	0.322	0.145	0.000142813	Micro	Bin1cKO_LPSvsBin1cKO_PBS
472	Ly86	5.67662e-09	0.452938	0.859	0.729	0.000144447	Micro	Bin1cKO_LPSvsBin1cKO_PBS
473	Neil3	5.97761e-09	5.33718	0.103	0	0.000152106	Micro	Bin1cKO_LPSvsBin1cKO_PBS
474	Gm4316	6.46864e-09	2.59572	0.152	0.026	0.000164601	Micro	Bin1cKO_LPSvsBin1cKO_PBS
475	Fcer1g	7.18252e-09	0.83412	0.49	0.31	0.000182766	Micro	Bin1cKO_LPSvsBin1cKO_PBS
476	Cd83	7.53789e-09	2.20816	0.168	0.036	0.000191809	Micro	Bin1cKO_LPSvsBin1cKO_PBS
477	Anln	7.60559e-09	5.9086	0.102	0	0.000193532	Micro	Bin1cKO_LPSvsBin1cKO_PBS
478	Khdrbs3	7.96683e-09	-2.23436	0.046	0.145	0.000202724	Micro	Bin1cKO_LPSvsBin1cKO_PBS
479	Rccd1	7.97294e-09	3.36579	0.133	0.017	0.000202879	Micro	Bin1cKO_LPSvsBin1cKO_PBS
480	Zfp981	8.15102e-09	1.53775	0.349	0.182	0.000207411	Micro	Bin1cKO_LPSvsBin1cKO_PBS
481	Kif4	8.4171e-09	4.54991	0.108	0.003	0.000214181	Micro	Bin1cKO_LPSvsBin1cKO_PBS
482	Mis18bp1	8.56613e-09	4.43702	0.115	0.007	0.000217974	Micro	Bin1cKO_LPSvsBin1cKO_PBS
483	Cd86	8.84477e-09	0.684169	0.637	0.452	0.000225064	Micro	Bin1cKO_LPSvsBin1cKO_PBS
484	Cept1	9.25499e-09	0.704451	0.544	0.314	0.000235502	Micro	Bin1cKO_LPSvsBin1cKO_PBS
485	Arhgap19	9.56016e-09	3.25393	0.121	0.01	0.000243268	Micro	Bin1cKO_LPSvsBin1cKO_PBS
486	Large1	1.0854e-08	-0.659214	0.643	0.706	0.000276192	Micro	Bin1cKO_LPSvsBin1cKO_PBS
487	Ptma	1.0974e-08	2.31974	0.161	0.033	0.000279246	Micro	Bin1cKO_LPSvsBin1cKO_PBS
488	Luc7l3	1.09839e-08	0.838252	0.438	0.241	0.000279498	Micro	Bin1cKO_LPSvsBin1cKO_PBS
489	Rab11fip5	1.10457e-08	1.51132	0.247	0.092	0.00028107	Micro	Bin1cKO_LPSvsBin1cKO_PBS
490	Baz1b	1.16027e-08	1.20621	0.283	0.116	0.000295242	Micro	Bin1cKO_LPSvsBin1cKO_PBS
491	Fgr	1.17825e-08	3.05515	0.126	0.013	0.000299819	Micro	Bin1cKO_LPSvsBin1cKO_PBS
492	Camkk2	1.21332e-08	1.08114	0.3	0.125	0.000308741	Micro	Bin1cKO_LPSvsBin1cKO_PBS
493	Marcks	1.25194e-08	0.652747	0.585	0.373	0.000318568	Micro	Bin1cKO_LPSvsBin1cKO_PBS
494	Kif20b	1.40351e-08	3.90557	0.112	0.007	0.000357137	Micro	Bin1cKO_LPSvsBin1cKO_PBS
495	Smyd3	1.45373e-08	-0.77667	0.479	0.594	0.000369916	Micro	Bin1cKO_LPSvsBin1cKO_PBS
496	C1qc	1.60688e-08	0.386549	0.954	0.881	0.000408887	Micro	Bin1cKO_LPSvsBin1cKO_PBS
497	Tnks2	1.76989e-08	0.772169	0.368	0.175	0.000450365	Micro	Bin1cKO_LPSvsBin1cKO_PBS
498	Usp12	1.77166e-08	1.01738	0.384	0.205	0.000450816	Micro	Bin1cKO_LPSvsBin1cKO_PBS
499	C1qb	1.78992e-08	0.397753	0.929	0.842	0.000455463	Micro	Bin1cKO_LPSvsBin1cKO_PBS
500	Snx32	1.8196e-08	2.17206	0.163	0.036	0.000463015	Micro	Bin1cKO_LPSvsBin1cKO_PBS
501	Kif24	1.90762e-08	3.38231	0.105	0.003	0.000485412	Micro	Bin1cKO_LPSvsBin1cKO_PBS
502	Tnfrsf11a	1.92377e-08	0.980677	0.419	0.244	0.000489523	Micro	Bin1cKO_LPSvsBin1cKO_PBS
503	Pfkfb3	2.09459e-08	1.19751	0.332	0.162	0.000532989	Micro	Bin1cKO_LPSvsBin1cKO_PBS
504	Tpx2	2.15124e-08	4.07684	0.11	0.007	0.000547404	Micro	Bin1cKO_LPSvsBin1cKO_PBS
505	Skil	2.19697e-08	0.813041	0.496	0.314	0.00055904	Micro	Bin1cKO_LPSvsBin1cKO_PBS
506	C3ar1	2.21105e-08	1.51909	0.222	0.076	0.000562625	Micro	Bin1cKO_LPSvsBin1cKO_PBS
507	Lrrfip1	2.42517e-08	0.920777	0.365	0.178	0.000617109	Micro	Bin1cKO_LPSvsBin1cKO_PBS
508	Pde1c	2.68791e-08	1.19087	0.264	0.106	0.000683965	Micro	Bin1cKO_LPSvsBin1cKO_PBS
509	Cd33	2.7016e-08	0.614379	0.655	0.462	0.000687449	Micro	Bin1cKO_LPSvsBin1cKO_PBS
510	Trim34a	2.96524e-08	1.55695	0.254	0.106	0.000754535	Micro	Bin1cKO_LPSvsBin1cKO_PBS
511	Ripor2	3.12583e-08	1.94149	0.145	0.026	0.000795398	Micro	Bin1cKO_LPSvsBin1cKO_PBS
512	Clic1	3.16064e-08	1.05694	0.375	0.208	0.000804258	Micro	Bin1cKO_LPSvsBin1cKO_PBS
513	Vps54	3.38334e-08	0.728777	0.535	0.327	0.000860925	Micro	Bin1cKO_LPSvsBin1cKO_PBS
514	Apobec1	3.42996e-08	0.934684	0.411	0.248	0.000872789	Micro	Bin1cKO_LPSvsBin1cKO_PBS
515	Dock2	3.64232e-08	0.437329	0.855	0.762	0.000926824	Micro	Bin1cKO_LPSvsBin1cKO_PBS
516	Gsap	3.64679e-08	0.748567	0.501	0.314	0.000927962	Micro	Bin1cKO_LPSvsBin1cKO_PBS
517	Gm12185	3.85377e-08	1.35653	0.281	0.125	0.00098063	Micro	Bin1cKO_LPSvsBin1cKO_PBS
518	Ppib	3.904e-08	2.0257	0.178	0.05	0.000993413	Micro	Bin1cKO_LPSvsBin1cKO_PBS
519	Gnpda1	3.92688e-08	1.93557	0.178	0.05	0.000999234	Micro	Bin1cKO_LPSvsBin1cKO_PBS
520	Lat2	4.21708e-08	1.47018	0.234	0.089	0.00107308	Micro	Bin1cKO_LPSvsBin1cKO_PBS
521	Gm26916	4.51313e-08	1.18817	0.3	0.139	0.00114841	Micro	Bin1cKO_LPSvsBin1cKO_PBS
522	Actr3	4.65177e-08	0.716978	0.436	0.241	0.00118369	Micro	Bin1cKO_LPSvsBin1cKO_PBS
523	Rnf180	4.65711e-08	0.59252	0.671	0.475	0.00118505	Micro	Bin1cKO_LPSvsBin1cKO_PBS
524	Pml	4.70412e-08	2.0128	0.191	0.059	0.00119701	Micro	Bin1cKO_LPSvsBin1cKO_PBS
525	Senp2	5.11673e-08	0.623965	0.511	0.31	0.001302	Micro	Bin1cKO_LPSvsBin1cKO_PBS
526	Smim3	5.18069e-08	2.13628	0.142	0.026	0.00131828	Micro	Bin1cKO_LPSvsBin1cKO_PBS
527	Nedd4l	5.57714e-08	0.740487	0.475	0.274	0.00141916	Micro	Bin1cKO_LPSvsBin1cKO_PBS
528	Elf2	5.70772e-08	0.718412	0.453	0.254	0.00145239	Micro	Bin1cKO_LPSvsBin1cKO_PBS
529	Zfhx3	6.25643e-08	-0.363573	0.945	0.941	0.00159201	Micro	Bin1cKO_LPSvsBin1cKO_PBS
530	Atp6v1b2	6.90043e-08	1.12038	0.283	0.125	0.00175588	Micro	Bin1cKO_LPSvsBin1cKO_PBS
531	Ccr5	6.92732e-08	0.884629	0.555	0.383	0.00176273	Micro	Bin1cKO_LPSvsBin1cKO_PBS
532	Rhoq	7.08716e-08	0.597775	0.489	0.281	0.0018034	Micro	Bin1cKO_LPSvsBin1cKO_PBS
533	Cd48	7.12834e-08	1.38827	0.232	0.089	0.00181388	Micro	Bin1cKO_LPSvsBin1cKO_PBS
534	Smc2	7.23056e-08	3.03312	0.137	0.026	0.00183989	Micro	Bin1cKO_LPSvsBin1cKO_PBS
535	Snx24	7.85393e-08	0.751835	0.532	0.33	0.00199851	Micro	Bin1cKO_LPSvsBin1cKO_PBS
536	Ifih1	7.97057e-08	2.94444	0.132	0.023	0.00202819	Micro	Bin1cKO_LPSvsBin1cKO_PBS
537	Slfn8	8.10244e-08	1.34033	0.276	0.125	0.00206175	Micro	Bin1cKO_LPSvsBin1cKO_PBS
538	Bach2os	8.28416e-08	1.68318	0.186	0.056	0.00210799	Micro	Bin1cKO_LPSvsBin1cKO_PBS
539	Herc6	8.61824e-08	1.56183	0.283	0.129	0.002193	Micro	Bin1cKO_LPSvsBin1cKO_PBS
540	Sass6	9.02792e-08	1.62125	0.19	0.059	0.00229724	Micro	Bin1cKO_LPSvsBin1cKO_PBS
541	Fndc3b	9.0393e-08	0.683807	0.425	0.234	0.00230014	Micro	Bin1cKO_LPSvsBin1cKO_PBS
542	Vps13c	9.69623e-08	0.776494	0.365	0.185	0.0024673	Micro	Bin1cKO_LPSvsBin1cKO_PBS
543	Acox3	9.75329e-08	1.16829	0.254	0.106	0.00248182	Micro	Bin1cKO_LPSvsBin1cKO_PBS
544	Phka2	9.80465e-08	0.832156	0.298	0.132	0.00249489	Micro	Bin1cKO_LPSvsBin1cKO_PBS
545	Rpl3	1.02571e-07	1.60354	0.172	0.046	0.00261003	Micro	Bin1cKO_LPSvsBin1cKO_PBS
546	Kcnma1	1.0533e-07	0.7367	0.46	0.274	0.00268022	Micro	Bin1cKO_LPSvsBin1cKO_PBS
547	Usp18	1.07746e-07	3.16861	0.113	0.013	0.0027417	Micro	Bin1cKO_LPSvsBin1cKO_PBS
548	Dgkz	1.12018e-07	1.10898	0.259	0.109	0.00285041	Micro	Bin1cKO_LPSvsBin1cKO_PBS
549	Stx16	1.15128e-07	0.656669	0.484	0.294	0.00292955	Micro	Bin1cKO_LPSvsBin1cKO_PBS
550	Wdpcp	1.21879e-07	1.16726	0.238	0.092	0.00310134	Micro	Bin1cKO_LPSvsBin1cKO_PBS
551	Fhit	1.24331e-07	-0.91941	0.424	0.545	0.00316372	Micro	Bin1cKO_LPSvsBin1cKO_PBS
552	Gm5086	1.29633e-07	0.680604	0.544	0.37	0.00329864	Micro	Bin1cKO_LPSvsBin1cKO_PBS
553	P2rx7	1.43582e-07	0.697966	0.515	0.327	0.0036536	Micro	Bin1cKO_LPSvsBin1cKO_PBS
554	Zcchc7	1.46001e-07	-0.484481	0.692	0.779	0.00371513	Micro	Bin1cKO_LPSvsBin1cKO_PBS
555	Ppp4r3b	1.46302e-07	0.684111	0.339	0.162	0.00372279	Micro	Bin1cKO_LPSvsBin1cKO_PBS
556	Rcbtb2	1.46683e-07	0.558517	0.6	0.406	0.00373248	Micro	Bin1cKO_LPSvsBin1cKO_PBS
557	Slc6a6	1.5315e-07	0.755261	0.414	0.234	0.00389707	Micro	Bin1cKO_LPSvsBin1cKO_PBS
558	Actr2	1.58124e-07	0.671267	0.524	0.343	0.00402363	Micro	Bin1cKO_LPSvsBin1cKO_PBS
559	Nadk	1.60903e-07	1.39446	0.253	0.109	0.00409434	Micro	Bin1cKO_LPSvsBin1cKO_PBS
560	Kif18a	1.69688e-07	3.42861	0.105	0.01	0.00431788	Micro	Bin1cKO_LPSvsBin1cKO_PBS
561	Lyz2	1.71799e-07	1.5106	0.192	0.063	0.00437159	Micro	Bin1cKO_LPSvsBin1cKO_PBS
562	Pros1	1.7395e-07	0.560877	0.569	0.383	0.00442632	Micro	Bin1cKO_LPSvsBin1cKO_PBS
563	Cd300lf	1.78116e-07	3.08757	0.105	0.01	0.00453234	Micro	Bin1cKO_LPSvsBin1cKO_PBS
564	Uty	1.82189e-07	0.619684	0.502	0.307	0.00463597	Micro	Bin1cKO_LPSvsBin1cKO_PBS
565	Cyba	1.89072e-07	0.815652	0.471	0.317	0.00481112	Micro	Bin1cKO_LPSvsBin1cKO_PBS
566	Slc24a3	1.91261e-07	-0.767283	0.434	0.554	0.00486682	Micro	Bin1cKO_LPSvsBin1cKO_PBS
567	Pbxip1	1.98283e-07	1.27924	0.212	0.076	0.00504552	Micro	Bin1cKO_LPSvsBin1cKO_PBS
568	Ptms	2.05304e-07	1.53432	0.195	0.066	0.00522417	Micro	Bin1cKO_LPSvsBin1cKO_PBS
569	Rnf19b	2.07657e-07	1.63719	0.222	0.089	0.00528405	Micro	Bin1cKO_LPSvsBin1cKO_PBS
570	Amz1	2.15438e-07	1.7576	0.187	0.063	0.00548205	Micro	Bin1cKO_LPSvsBin1cKO_PBS
571	Stat2	2.18886e-07	1.69915	0.211	0.079	0.00556978	Micro	Bin1cKO_LPSvsBin1cKO_PBS
572	Slfn2	2.22316e-07	2.09397	0.133	0.026	0.00565705	Micro	Bin1cKO_LPSvsBin1cKO_PBS
573	F11r	2.24801e-07	0.586625	0.562	0.386	0.00572028	Micro	Bin1cKO_LPSvsBin1cKO_PBS
574	Ms4a6c	2.30513e-07	1.45171	0.2	0.069	0.00586564	Micro	Bin1cKO_LPSvsBin1cKO_PBS
575	Dtnbp1	2.31223e-07	1.16525	0.252	0.106	0.00588371	Micro	Bin1cKO_LPSvsBin1cKO_PBS
576	Bank1	2.35859e-07	-0.928158	0.263	0.413	0.00600166	Micro	Bin1cKO_LPSvsBin1cKO_PBS
577	Rbm39	2.40739e-07	0.385325	0.906	0.815	0.00612584	Micro	Bin1cKO_LPSvsBin1cKO_PBS
578	Slc16a10	2.4126e-07	1.18068	0.242	0.102	0.0061391	Micro	Bin1cKO_LPSvsBin1cKO_PBS
579	Parp12	2.55789e-07	1.68721	0.178	0.056	0.0065088	Micro	Bin1cKO_LPSvsBin1cKO_PBS
580	Ppfia4	2.58508e-07	1.04889	0.325	0.175	0.00657799	Micro	Bin1cKO_LPSvsBin1cKO_PBS
581	Synj1	2.61123e-07	0.637536	0.521	0.323	0.00664452	Micro	Bin1cKO_LPSvsBin1cKO_PBS
582	AC149090.1	2.62802e-07	0.397619	0.889	0.799	0.00668725	Micro	Bin1cKO_LPSvsBin1cKO_PBS
583	Hk2	2.73452e-07	0.662058	0.522	0.353	0.00695826	Micro	Bin1cKO_LPSvsBin1cKO_PBS
584	Oaz1	2.76583e-07	2.1432	0.147	0.036	0.00703793	Micro	Bin1cKO_LPSvsBin1cKO_PBS
585	Fgd4	2.85614e-07	0.60723	0.458	0.264	0.00726772	Micro	Bin1cKO_LPSvsBin1cKO_PBS
586	Samhd1	3.05368e-07	1.08338	0.343	0.182	0.0077704	Micro	Bin1cKO_LPSvsBin1cKO_PBS
587	Myo18b	3.47204e-07	-1.21986	0.09	0.201	0.00883496	Micro	Bin1cKO_LPSvsBin1cKO_PBS
588	Wsb1	3.54663e-07	0.607013	0.466	0.277	0.00902476	Micro	Bin1cKO_LPSvsBin1cKO_PBS
589	Fcgr1	3.61739e-07	1.05062	0.31	0.162	0.0092048	Micro	Bin1cKO_LPSvsBin1cKO_PBS
590	Lst1	3.61939e-07	1.00624	0.292	0.142	0.0092099	Micro	Bin1cKO_LPSvsBin1cKO_PBS
591	Relch	3.72782e-07	0.736314	0.411	0.234	0.00948582	Micro	Bin1cKO_LPSvsBin1cKO_PBS
592	Pfkfb4	3.75801e-07	1.31561	0.192	0.066	0.00956264	Micro	Bin1cKO_LPSvsBin1cKO_PBS
593	Cxcl16	3.79611e-07	1.91764	0.146	0.036	0.00965959	Micro	Bin1cKO_LPSvsBin1cKO_PBS
594	2900089D17Rik	3.83797e-07	1.90057	0.165	0.05	0.0097661	Micro	Bin1cKO_LPSvsBin1cKO_PBS
595	Gm46224	3.90287e-07	1.27798	0.266	0.125	0.00993125	Micro	Bin1cKO_LPSvsBin1cKO_PBS
596	Morc3	3.96183e-07	0.67284	0.495	0.314	0.0100813	Micro	Bin1cKO_LPSvsBin1cKO_PBS
597	Gm43305	3.99159e-07	1.35653	0.253	0.116	0.010157	Micro	Bin1cKO_LPSvsBin1cKO_PBS
598	Polb	4.12104e-07	1.04675	0.236	0.096	0.0104864	Micro	Bin1cKO_LPSvsBin1cKO_PBS
599	Sfi1	4.20105e-07	0.772508	0.481	0.307	0.01069	Micro	Bin1cKO_LPSvsBin1cKO_PBS
600	Klhl5	4.29428e-07	1.29616	0.202	0.073	0.0109272	Micro	Bin1cKO_LPSvsBin1cKO_PBS
601	Rps8	4.45318e-07	0.901296	0.284	0.135	0.0113316	Micro	Bin1cKO_LPSvsBin1cKO_PBS
602	Ifngr2	4.54679e-07	0.835767	0.435	0.281	0.0115698	Micro	Bin1cKO_LPSvsBin1cKO_PBS
603	Incenp	4.54999e-07	2.725	0.122	0.023	0.0115779	Micro	Bin1cKO_LPSvsBin1cKO_PBS
604	Myo9b	4.60827e-07	0.767084	0.398	0.224	0.0117262	Micro	Bin1cKO_LPSvsBin1cKO_PBS
605	Irf8	4.81248e-07	0.760025	0.505	0.36	0.0122458	Micro	Bin1cKO_LPSvsBin1cKO_PBS
606	Capza2	5.3104e-07	0.607803	0.565	0.376	0.0135128	Micro	Bin1cKO_LPSvsBin1cKO_PBS
607	Vps41	5.37626e-07	0.752759	0.359	0.191	0.0136804	Micro	Bin1cKO_LPSvsBin1cKO_PBS
608	Macf1	5.41351e-07	-0.366711	0.899	0.931	0.0137752	Micro	Bin1cKO_LPSvsBin1cKO_PBS
609	Fam129a	5.51822e-07	1.32843	0.219	0.089	0.0140417	Micro	Bin1cKO_LPSvsBin1cKO_PBS
610	C1qa	5.59765e-07	0.361877	0.958	0.865	0.0142438	Micro	Bin1cKO_LPSvsBin1cKO_PBS
611	Raet1e	5.60459e-07	1.47018	0.185	0.063	0.0142614	Micro	Bin1cKO_LPSvsBin1cKO_PBS
612	Scarb2	5.82729e-07	0.613749	0.474	0.284	0.0148281	Micro	Bin1cKO_LPSvsBin1cKO_PBS
613	Slc38a6	6.24575e-07	0.982452	0.294	0.145	0.0158929	Micro	Bin1cKO_LPSvsBin1cKO_PBS
614	Zup1	6.2693e-07	0.629917	0.53	0.34	0.0159529	Micro	Bin1cKO_LPSvsBin1cKO_PBS
615	Git2	6.64464e-07	0.563577	0.612	0.439	0.0169079	Micro	Bin1cKO_LPSvsBin1cKO_PBS
616	Diaph1	6.78436e-07	0.935566	0.163	0.046	0.0172635	Micro	Bin1cKO_LPSvsBin1cKO_PBS
617	Hipk2	7.17882e-07	0.574342	0.448	0.261	0.0182672	Micro	Bin1cKO_LPSvsBin1cKO_PBS
618	Actg1	7.23865e-07	2.23957	0.126	0.026	0.0184195	Micro	Bin1cKO_LPSvsBin1cKO_PBS
619	Spata13	7.38627e-07	0.925983	0.308	0.158	0.0187951	Micro	Bin1cKO_LPSvsBin1cKO_PBS
620	Ypel3	7.94674e-07	0.802678	0.35	0.191	0.0202213	Micro	Bin1cKO_LPSvsBin1cKO_PBS
621	Runx1	7.94896e-07	0.495504	0.838	0.729	0.0202269	Micro	Bin1cKO_LPSvsBin1cKO_PBS
622	Gpr137b	8.15662e-07	0.971354	0.271	0.125	0.0207553	Micro	Bin1cKO_LPSvsBin1cKO_PBS
623	Pkp4	8.16393e-07	1.6661	0.148	0.04	0.0207739	Micro	Bin1cKO_LPSvsBin1cKO_PBS
624	Hlf	8.17342e-07	-2.52767	0.031	0.102	0.0207981	Micro	Bin1cKO_LPSvsBin1cKO_PBS
625	Mtus1	8.31965e-07	0.463239	0.584	0.386	0.0211702	Micro	Bin1cKO_LPSvsBin1cKO_PBS
626	Parva	8.37509e-07	1.45752	0.178	0.059	0.0213113	Micro	Bin1cKO_LPSvsBin1cKO_PBS
627	Cyp27a1	8.45134e-07	0.944035	0.274	0.125	0.0215053	Micro	Bin1cKO_LPSvsBin1cKO_PBS
628	Ifitm10	9.35426e-07	-0.635458	0.424	0.564	0.0238028	Micro	Bin1cKO_LPSvsBin1cKO_PBS
629	Slfn5	9.36537e-07	2.26814	0.12	0.023	0.0238311	Micro	Bin1cKO_LPSvsBin1cKO_PBS
630	Aim2	9.52729e-07	0.573105	0.555	0.366	0.0242431	Micro	Bin1cKO_LPSvsBin1cKO_PBS
631	Slc25a36	9.89146e-07	0.698809	0.358	0.188	0.0251698	Micro	Bin1cKO_LPSvsBin1cKO_PBS
632	Wdfy1	1.00465e-06	0.967397	0.267	0.125	0.0255644	Micro	Bin1cKO_LPSvsBin1cKO_PBS
633	Nfia	1.04222e-06	-0.543687	0.746	0.785	0.0265204	Micro	Bin1cKO_LPSvsBin1cKO_PBS
634	Hltf	1.06786e-06	0.68428	0.458	0.281	0.0271729	Micro	Bin1cKO_LPSvsBin1cKO_PBS
635	Slc36a1	1.06795e-06	0.645564	0.443	0.264	0.0271751	Micro	Bin1cKO_LPSvsBin1cKO_PBS
636	Rnf115	1.08832e-06	1.16419	0.236	0.102	0.0276933	Micro	Bin1cKO_LPSvsBin1cKO_PBS
637	Nras	1.09038e-06	2.47486	0.112	0.02	0.0277457	Micro	Bin1cKO_LPSvsBin1cKO_PBS
638	Mir142hg	1.09871e-06	0.737896	0.48	0.327	0.0279579	Micro	Bin1cKO_LPSvsBin1cKO_PBS
639	Snx10	1.10546e-06	0.86179	0.307	0.155	0.0281297	Micro	Bin1cKO_LPSvsBin1cKO_PBS
640	Arhgap17	1.11398e-06	0.56747	0.589	0.403	0.0283463	Micro	Bin1cKO_LPSvsBin1cKO_PBS
641	Susd6	1.13714e-06	0.57086	0.436	0.254	0.0289357	Micro	Bin1cKO_LPSvsBin1cKO_PBS
642	Elf1	1.19321e-06	0.657026	0.489	0.317	0.0303624	Micro	Bin1cKO_LPSvsBin1cKO_PBS
643	Etv6	1.19334e-06	0.415323	0.776	0.607	0.0303658	Micro	Bin1cKO_LPSvsBin1cKO_PBS
644	Tor1aip1	1.23808e-06	0.686318	0.413	0.248	0.0315042	Micro	Bin1cKO_LPSvsBin1cKO_PBS
645	Pik3r6	1.27552e-06	0.981006	0.258	0.122	0.0324569	Micro	Bin1cKO_LPSvsBin1cKO_PBS
646	Chka	1.30063e-06	0.913516	0.273	0.129	0.0330957	Micro	Bin1cKO_LPSvsBin1cKO_PBS
647	Arhgap5	1.31148e-06	-0.602287	0.707	0.719	0.0333718	Micro	Bin1cKO_LPSvsBin1cKO_PBS
648	Arfgef2	1.3133e-06	1.20114	0.203	0.079	0.0334183	Micro	Bin1cKO_LPSvsBin1cKO_PBS
649	Ust	1.31762e-06	0.720489	0.358	0.198	0.0335282	Micro	Bin1cKO_LPSvsBin1cKO_PBS
650	Utrn	1.36451e-06	1.0682	0.271	0.132	0.0347214	Micro	Bin1cKO_LPSvsBin1cKO_PBS
651	Cep95	1.37063e-06	1.57995	0.165	0.053	0.034877	Micro	Bin1cKO_LPSvsBin1cKO_PBS
652	Hnrnpu	1.40727e-06	0.752817	0.377	0.215	0.0358093	Micro	Bin1cKO_LPSvsBin1cKO_PBS
653	Gm20275	1.40891e-06	0.529991	0.504	0.31	0.0358512	Micro	Bin1cKO_LPSvsBin1cKO_PBS
654	Sik3	1.45059e-06	0.768552	0.382	0.234	0.0369118	Micro	Bin1cKO_LPSvsBin1cKO_PBS
655	Gm3739	1.48273e-06	-1.37112	0.052	0.139	0.0377296	Micro	Bin1cKO_LPSvsBin1cKO_PBS
656	Gm15283	1.54007e-06	1.21239	0.224	0.096	0.0391886	Micro	Bin1cKO_LPSvsBin1cKO_PBS
657	Snx30	1.54665e-06	0.793828	0.358	0.198	0.039356	Micro	Bin1cKO_LPSvsBin1cKO_PBS
658	Dram2	1.61852e-06	0.564534	0.444	0.264	0.0411848	Micro	Bin1cKO_LPSvsBin1cKO_PBS
659	Trpv2	1.65613e-06	1.61457	0.162	0.053	0.0421419	Micro	Bin1cKO_LPSvsBin1cKO_PBS
660	Cd72	1.706e-06	2.41772	0.11	0.02	0.0434108	Micro	Bin1cKO_LPSvsBin1cKO_PBS
661	Daglb	1.74989e-06	0.650803	0.489	0.32	0.0445278	Micro	Bin1cKO_LPSvsBin1cKO_PBS
662	Mapkapk2	1.77129e-06	1.62252	0.161	0.053	0.0450722	Micro	Bin1cKO_LPSvsBin1cKO_PBS
663	Myh9	1.79583e-06	0.590402	0.419	0.248	0.0456966	Micro	Bin1cKO_LPSvsBin1cKO_PBS
664	Adar	1.88844e-06	1.20953	0.197	0.076	0.0480533	Micro	Bin1cKO_LPSvsBin1cKO_PBS
665	Gm4951	1.89217e-06	2.11928	0.141	0.04	0.0481482	Micro	Bin1cKO_LPSvsBin1cKO_PBS
666	Fam13b	1.92037e-06	0.562357	0.471	0.294	0.0488658	Micro	Bin1cKO_LPSvsBin1cKO_PBS
667	Gart	1.94307e-06	1.11782	0.206	0.083	0.0494433	Micro	Bin1cKO_LPSvsBin1cKO_PBS
668	Rab43	1.94328e-06	0.921538	0.308	0.165	0.0494488	Micro	Bin1cKO_LPSvsBin1cKO_PBS
669	Dpy19l4	1.95037e-06	0.672738	0.455	0.29	0.0496292	Micro	Bin1cKO_LPSvsBin1cKO_PBS
670	Apod	9.6545e-07	1.34922	0.918	0.776	0.0245668	VLMC	Bin1cKO_LPSvsBin1cKO_PBS
671	Pak7	5.09957e-23	-0.698418	0.686	0.86	1.29764e-18	GluNeu	Bin1cKO_LPSvsControl_LPS
672	Grm3	1.54501e-17	-0.864629	0.424	0.665	3.93143e-13	GluNeu	Bin1cKO_LPSvsControl_LPS
673	Kcnh7	8.28088e-17	-0.404684	0.953	0.961	2.10715e-12	GluNeu	Bin1cKO_LPSvsControl_LPS
674	Kcnd3	2.01446e-16	0.858873	0.691	0.519	5.12598e-12	GluNeu	Bin1cKO_LPSvsControl_LPS
675	Hecw2	2.20695e-16	-0.484403	0.791	0.911	5.61582e-12	GluNeu	Bin1cKO_LPSvsControl_LPS
676	Pcsk2os2	3.77518e-13	-0.973145	0.26	0.456	9.60633e-09	GluNeu	Bin1cKO_LPSvsControl_LPS
677	Ntrk2	1.07986e-12	0.487029	0.927	0.911	2.74782e-08	GluNeu	Bin1cKO_LPSvsControl_LPS
678	Pde10a	1.45285e-12	0.421884	0.963	0.968	3.69692e-08	GluNeu	Bin1cKO_LPSvsControl_LPS
679	Dscaml1	1.76627e-11	0.871204	0.539	0.377	4.49445e-07	GluNeu	Bin1cKO_LPSvsControl_LPS
680	Zdhhc14	5.51336e-11	0.701279	0.585	0.417	1.40293e-06	GluNeu	Bin1cKO_LPSvsControl_LPS
681	4930415C11Rik	1.81035e-10	1.10507	0.401	0.24	4.60662e-06	GluNeu	Bin1cKO_LPSvsControl_LPS
682	Npas3	1.88928e-10	2.53506	0.148	0.039	4.80746e-06	GluNeu	Bin1cKO_LPSvsControl_LPS
683	Ano3	9.72672e-10	-0.48395	0.689	0.807	2.47506e-05	GluNeu	Bin1cKO_LPSvsControl_LPS
684	Tmtc1	1.02135e-09	-0.759255	0.342	0.504	2.59894e-05	GluNeu	Bin1cKO_LPSvsControl_LPS
685	Gm42418	1.6849e-09	0.395553	0.962	0.939	4.28739e-05	GluNeu	Bin1cKO_LPSvsControl_LPS
686	Kcnh1	3.71435e-09	-0.484994	0.628	0.75	9.45154e-05	GluNeu	Bin1cKO_LPSvsControl_LPS
687	Tox	4.21442e-09	-1.06336	0.222	0.372	0.00010724	GluNeu	Bin1cKO_LPSvsControl_LPS
688	Chsy3	4.30967e-09	-0.467813	0.738	0.848	0.000109664	GluNeu	Bin1cKO_LPSvsControl_LPS
689	Gm12394	4.81416e-09	-0.29495	0.895	0.955	0.000122501	GluNeu	Bin1cKO_LPSvsControl_LPS
690	Rgl1	1.74723e-08	0.752809	0.433	0.279	0.0004446	GluNeu	Bin1cKO_LPSvsControl_LPS
691	Htr1f	2.40152e-08	-0.545988	0.475	0.637	0.000611091	GluNeu	Bin1cKO_LPSvsControl_LPS
692	Slc2a13	4.93983e-08	0.630519	0.74	0.671	0.00125699	GluNeu	Bin1cKO_LPSvsControl_LPS
693	Ncam2	5.26431e-08	-0.412897	0.74	0.832	0.00133956	GluNeu	Bin1cKO_LPSvsControl_LPS
694	4930578G10Rik	6.0483e-08	-0.268373	0.914	0.97	0.00153905	GluNeu	Bin1cKO_LPSvsControl_LPS
695	Adam23	7.7834e-08	-0.578312	0.34	0.496	0.00198056	GluNeu	Bin1cKO_LPSvsControl_LPS
696	Gm13963	2.0455e-07	-0.96252	0.133	0.254	0.00520497	GluNeu	Bin1cKO_LPSvsControl_LPS
697	AC149090.1	3.2265e-07	0.311565	0.92	0.919	0.00821016	GluNeu	Bin1cKO_LPSvsControl_LPS
698	Pou6f2	3.61397e-07	-0.858513	0.262	0.392	0.0091961	GluNeu	Bin1cKO_LPSvsControl_LPS
699	Snca	5.78182e-07	0.645404	0.412	0.277	0.0147124	GluNeu	Bin1cKO_LPSvsControl_LPS
700	4930587E11Rik	7.05817e-07	-0.66145	0.356	0.49	0.0179602	GluNeu	Bin1cKO_LPSvsControl_LPS
701	Rapgef5	7.09202e-07	-0.490881	0.447	0.572	0.0180464	GluNeu	Bin1cKO_LPSvsControl_LPS
702	Kcnt2	8.36786e-07	-0.354259	0.729	0.835	0.0212928	GluNeu	Bin1cKO_LPSvsControl_LPS
703	Sorcs1	1.01726e-06	-0.495527	0.539	0.644	0.0258851	GluNeu	Bin1cKO_LPSvsControl_LPS
704	Cmip	1.08066e-06	0.419597	0.674	0.547	0.0274984	GluNeu	Bin1cKO_LPSvsControl_LPS
705	Fgf13	1.13656e-06	0.868965	0.188	0.086	0.0289209	GluNeu	Bin1cKO_LPSvsControl_LPS
706	Spock1	1.26626e-06	-0.261461	0.829	0.898	0.0322214	GluNeu	Bin1cKO_LPSvsControl_LPS
707	Zfp973	1.30853e-06	-0.468244	0.421	0.558	0.0332968	GluNeu	Bin1cKO_LPSvsControl_LPS
708	Cpne6	1.38248e-06	1.3139	0.136	0.052	0.0351785	GluNeu	Bin1cKO_LPSvsControl_LPS
709	AC149090.1	1.00731e-11	0.430196	0.896	0.815	2.56321e-07	GABANeu	Bin1cKO_LPSvsControl_LPS
710	Tmem178b	1.15475e-07	0.478176	0.814	0.759	0.00293837	GABANeu	Bin1cKO_LPSvsControl_LPS
711	Gm28376	1.57883e-07	-0.828271	0.204	0.337	0.0040175	GABANeu	Bin1cKO_LPSvsControl_LPS
712	Rreb1	2.32342e-07	2.19229	0.146	0.052	0.00591218	GABANeu	Bin1cKO_LPSvsControl_LPS
713	Gm47423	4.06783e-07	-0.946517	0.124	0.235	0.010351	GABANeu	Bin1cKO_LPSvsControl_LPS
714	Mir99ahg	4.2113e-07	-0.572878	0.401	0.561	0.0107161	GABANeu	Bin1cKO_LPSvsControl_LPS
715	Ankfn1	4.33347e-07	1.71043	0.176	0.076	0.0110269	GABANeu	Bin1cKO_LPSvsControl_LPS
716	Tmeff2	5.83404e-07	0.731622	0.555	0.428	0.0148453	GABANeu	Bin1cKO_LPSvsControl_LPS
717	Gm19585	1.08098e-06	-0.748999	0.201	0.324	0.0275066	GABANeu	Bin1cKO_LPSvsControl_LPS
718	Pde1a	1.68899e-06	1.30896	0.341	0.222	0.0429781	GABANeu	Bin1cKO_LPSvsControl_LPS
719	Gm29683	5.59071e-19	4.04109	0.123	0.009	1.42261e-14	Astro	Bin1cKO_LPSvsControl_LPS
720	Scd2	5.29288e-16	0.575548	0.901	0.801	1.34683e-11	Astro	Bin1cKO_LPSvsControl_LPS
721	Gpm6a	9.65724e-15	0.420676	0.945	0.879	2.45738e-10	Astro	Bin1cKO_LPSvsControl_LPS
722	Hif3a	7.36605e-14	-0.772902	0.356	0.518	1.87436e-09	Astro	Bin1cKO_LPSvsControl_LPS
723	S1pr1	4.29691e-13	0.475953	0.772	0.647	1.09339e-08	Astro	Bin1cKO_LPSvsControl_LPS
724	Slc7a11	8.15819e-13	0.56137	0.692	0.541	2.07593e-08	Astro	Bin1cKO_LPSvsControl_LPS
725	Ncam2	2.23483e-12	0.692975	0.673	0.534	5.68675e-08	Astro	Bin1cKO_LPSvsControl_LPS
726	Mertk	4.04729e-12	-0.366829	0.91	0.927	1.02987e-07	Astro	Bin1cKO_LPSvsControl_LPS
727	Lrp1b	5.85981e-12	0.721855	0.716	0.627	1.49109e-07	Astro	Bin1cKO_LPSvsControl_LPS
728	Gm12394	1.12567e-11	-0.498702	0.57	0.717	2.86439e-07	Astro	Bin1cKO_LPSvsControl_LPS
729	Agt	2.50327e-11	1.9183	0.142	0.044	6.36981e-07	Astro	Bin1cKO_LPSvsControl_LPS
730	Ednrb	4.12189e-11	0.655729	0.515	0.366	1.04886e-06	Astro	Bin1cKO_LPSvsControl_LPS
731	Plekhg1	8.12064e-11	-0.509314	0.682	0.747	2.06638e-06	Astro	Bin1cKO_LPSvsControl_LPS
732	Gm48747	1.40236e-10	-0.446509	0.736	0.812	3.56845e-06	Astro	Bin1cKO_LPSvsControl_LPS
733	Fgfr2	1.61133e-10	-0.289424	0.972	0.976	4.1002e-06	Astro	Bin1cKO_LPSvsControl_LPS
734	Dcc	5.14677e-10	-0.56022	0.371	0.52	1.30965e-05	Astro	Bin1cKO_LPSvsControl_LPS
735	4930578G10Rik	5.58444e-10	-0.526926	0.654	0.755	1.42102e-05	Astro	Bin1cKO_LPSvsControl_LPS
736	Fry	6.05899e-10	0.668088	0.548	0.419	1.54177e-05	Astro	Bin1cKO_LPSvsControl_LPS
737	Zfp608	6.53426e-10	0.452332	0.656	0.506	1.66271e-05	Astro	Bin1cKO_LPSvsControl_LPS
738	Kcnd2	1.36128e-09	0.969379	0.457	0.326	3.46392e-05	Astro	Bin1cKO_LPSvsControl_LPS
739	Ppp2r2b	1.37946e-09	0.319013	0.917	0.865	3.51016e-05	Astro	Bin1cKO_LPSvsControl_LPS
740	Slc4a4	1.50484e-09	0.349129	0.931	0.898	3.82921e-05	Astro	Bin1cKO_LPSvsControl_LPS
741	Gm42418	3.95997e-09	0.394849	0.989	0.977	0.000100765	Astro	Bin1cKO_LPSvsControl_LPS
742	Wnk2	3.99185e-09	-0.472698	0.598	0.694	0.000101577	Astro	Bin1cKO_LPSvsControl_LPS
743	Adcy8	4.77752e-09	1.57391	0.156	0.065	0.000121569	Astro	Bin1cKO_LPSvsControl_LPS
744	Robo1	9.16682e-09	0.788795	0.37	0.245	0.000233259	Astro	Bin1cKO_LPSvsControl_LPS
745	Gm20713	9.61264e-09	-0.315924	0.924	0.917	0.000244603	Astro	Bin1cKO_LPSvsControl_LPS
746	Prnp	1.43992e-08	0.461031	0.653	0.522	0.000366401	Astro	Bin1cKO_LPSvsControl_LPS
747	Nrcam	1.53944e-08	0.311236	0.909	0.856	0.000391727	Astro	Bin1cKO_LPSvsControl_LPS
748	Mt3	1.54767e-08	0.588464	0.609	0.499	0.00039382	Astro	Bin1cKO_LPSvsControl_LPS
749	Fth1	1.64656e-08	0.884709	0.42	0.289	0.000418985	Astro	Bin1cKO_LPSvsControl_LPS
750	Pde7b	1.70708e-08	0.410108	0.69	0.585	0.000434384	Astro	Bin1cKO_LPSvsControl_LPS
751	Dlgap1	2.38067e-08	0.254403	0.915	0.837	0.000605785	Astro	Bin1cKO_LPSvsControl_LPS
752	Gja1	3.0491e-08	0.399072	0.842	0.767	0.000775873	Astro	Bin1cKO_LPSvsControl_LPS
753	Sfxn5	4.31374e-08	0.273811	0.919	0.863	0.00109767	Astro	Bin1cKO_LPSvsControl_LPS
754	Csgalnact1	5.04717e-08	0.388625	0.757	0.677	0.0012843	Astro	Bin1cKO_LPSvsControl_LPS
755	Lrig1	5.36165e-08	0.687781	0.37	0.245	0.00136433	Astro	Bin1cKO_LPSvsControl_LPS
756	Gm26512	6.45335e-08	-0.504318	0.548	0.639	0.00164212	Astro	Bin1cKO_LPSvsControl_LPS
757	Dzip1l	8.81051e-08	-0.604636	0.284	0.408	0.00224192	Astro	Bin1cKO_LPSvsControl_LPS
758	Fkbp5	9.10083e-08	-1.14131	0.078	0.163	0.0023158	Astro	Bin1cKO_LPSvsControl_LPS
759	Adgrl3	1.10221e-07	0.261444	0.908	0.86	0.00280469	Astro	Bin1cKO_LPSvsControl_LPS
760	Gm45708	1.16613e-07	-1.12328	0.112	0.203	0.00296733	Astro	Bin1cKO_LPSvsControl_LPS
761	Npas2	1.65036e-07	-0.595878	0.401	0.505	0.0041995	Astro	Bin1cKO_LPSvsControl_LPS
762	Gm21798	1.76381e-07	1.06912	0.133	0.055	0.0044882	Astro	Bin1cKO_LPSvsControl_LPS
763	Fgf14	1.80387e-07	0.397987	0.725	0.598	0.00459014	Astro	Bin1cKO_LPSvsControl_LPS
764	4930545L23Rik	1.97256e-07	-0.930634	0.105	0.197	0.00501936	Astro	Bin1cKO_LPSvsControl_LPS
765	Rorb	2.48918e-07	0.261522	0.971	0.939	0.00633398	Astro	Bin1cKO_LPSvsControl_LPS
766	Ddx5	3.02734e-07	0.25932	0.946	0.894	0.00770336	Astro	Bin1cKO_LPSvsControl_LPS
767	Alms1	3.1273e-07	-0.491608	0.493	0.584	0.00795774	Astro	Bin1cKO_LPSvsControl_LPS
768	Ssbp2	3.80952e-07	0.327044	0.732	0.641	0.0096937	Astro	Bin1cKO_LPSvsControl_LPS
769	Tcf7l2	4.04775e-07	0.324905	0.749	0.655	0.0102999	Astro	Bin1cKO_LPSvsControl_LPS
770	Slc25a4	4.57677e-07	0.579184	0.4	0.283	0.0116461	Astro	Bin1cKO_LPSvsControl_LPS
771	Ifi27	6.40798e-07	0.817164	0.178	0.092	0.0163058	Astro	Bin1cKO_LPSvsControl_LPS
772	Cldn10	6.47639e-07	0.410794	0.594	0.475	0.0164798	Astro	Bin1cKO_LPSvsControl_LPS
773	Skap2	6.8008e-07	0.780996	0.252	0.153	0.0173053	Astro	Bin1cKO_LPSvsControl_LPS
774	Tmtc2	6.94792e-07	0.484519	0.653	0.556	0.0176797	Astro	Bin1cKO_LPSvsControl_LPS
775	Fabp5	7.37248e-07	0.868719	0.228	0.135	0.01876	Astro	Bin1cKO_LPSvsControl_LPS
776	Mical2	7.98833e-07	-0.344169	0.638	0.709	0.0203271	Astro	Bin1cKO_LPSvsControl_LPS
777	Sox6	1.05834e-06	0.265713	0.898	0.863	0.0269304	Astro	Bin1cKO_LPSvsControl_LPS
778	Ptn	1.1522e-06	0.290844	0.892	0.851	0.0293188	Astro	Bin1cKO_LPSvsControl_LPS
779	Zfp973	1.51075e-06	-0.450381	0.43	0.534	0.0384425	Astro	Bin1cKO_LPSvsControl_LPS
780	Cntn1	1.74469e-06	-0.466537	0.414	0.514	0.0443954	Astro	Bin1cKO_LPSvsControl_LPS
781	Fut9	1.79496e-06	0.306832	0.749	0.647	0.0456744	Astro	Bin1cKO_LPSvsControl_LPS
782	Scd2	1.40565e-90	0.610257	0.966	0.924	3.57682e-86	Oligo	Bin1cKO_LPSvsControl_LPS
783	Fth1	2.02053e-90	0.981296	0.929	0.872	5.14144e-86	Oligo	Bin1cKO_LPSvsControl_LPS
784	Apod	9.32851e-89	1.24274	0.888	0.823	2.37373e-84	Oligo	Bin1cKO_LPSvsControl_LPS
785	Gm42418	1.07213e-84	0.738235	0.966	0.937	2.72815e-80	Oligo	Bin1cKO_LPSvsControl_LPS
786	Plp1	2.74418e-78	0.324704	1	1	6.98284e-74	Oligo	Bin1cKO_LPSvsControl_LPS
787	Gm37459	7.70477e-70	-1.0719	0.373	0.603	1.96055e-65	Oligo	Bin1cKO_LPSvsControl_LPS
788	Ptgds	4.91979e-67	1.01413	0.907	0.872	1.25189e-62	Oligo	Bin1cKO_LPSvsControl_LPS
789	Mal	3.29195e-64	0.635662	0.925	0.855	8.37669e-60	Oligo	Bin1cKO_LPSvsControl_LPS
790	Pex5l	4.27571e-60	-0.607694	0.824	0.915	1.088e-55	Oligo	Bin1cKO_LPSvsControl_LPS
791	Zbtb16	3.48512e-53	-0.790416	0.492	0.672	8.86823e-49	Oligo	Bin1cKO_LPSvsControl_LPS
792	4930419G24Rik	6.52468e-51	-0.748911	0.531	0.705	1.66027e-46	Oligo	Bin1cKO_LPSvsControl_LPS
793	Slc15a2	3.9487e-48	-1.24968	0.171	0.351	1.00478e-43	Oligo	Bin1cKO_LPSvsControl_LPS
794	Cryab	1.36558e-47	1.10516	0.494	0.32	3.47487e-43	Oligo	Bin1cKO_LPSvsControl_LPS
795	Ccser1	1.29697e-46	-1.06045	0.271	0.458	3.30027e-42	Oligo	Bin1cKO_LPSvsControl_LPS
796	AY036118	2.47367e-45	0.652255	0.825	0.759	6.29449e-41	Oligo	Bin1cKO_LPSvsControl_LPS
797	Hsp90ab1	5.66632e-41	0.932107	0.463	0.293	1.44185e-36	Oligo	Bin1cKO_LPSvsControl_LPS
798	Apoe	1.62638e-37	0.854293	0.611	0.467	4.13848e-33	Oligo	Bin1cKO_LPSvsControl_LPS
799	Pacrg	5.11063e-34	-0.48603	0.811	0.88	1.30045e-29	Oligo	Bin1cKO_LPSvsControl_LPS
800	Kcnab1	4.54338e-28	-0.568557	0.548	0.676	1.15611e-23	Oligo	Bin1cKO_LPSvsControl_LPS
801	Pakap	2.97947e-27	-0.457304	0.703	0.795	7.58156e-23	Oligo	Bin1cKO_LPSvsControl_LPS
802	A330015K06Rik	7.65497e-27	-0.539546	0.551	0.667	1.94788e-22	Oligo	Bin1cKO_LPSvsControl_LPS
803	Rpl13	6.30139e-25	1.13627	0.224	0.117	1.60345e-20	Oligo	Bin1cKO_LPSvsControl_LPS
804	Atp6v0c	1.25995e-23	1.07345	0.229	0.124	3.20607e-19	Oligo	Bin1cKO_LPSvsControl_LPS
805	Syt11	3.16279e-23	0.505558	0.648	0.54	8.04804e-19	Oligo	Bin1cKO_LPSvsControl_LPS
806	Itm2b	4.01359e-23	0.508244	0.673	0.582	1.0213e-18	Oligo	Bin1cKO_LPSvsControl_LPS
807	Hsp90b1	5.10079e-23	1.00988	0.252	0.144	1.29795e-18	Oligo	Bin1cKO_LPSvsControl_LPS
808	Rcan2	6.4294e-23	-0.386436	0.642	0.742	1.63603e-18	Oligo	Bin1cKO_LPSvsControl_LPS
809	Aplp1	2.08402e-21	0.358907	0.833	0.781	5.303e-17	Oligo	Bin1cKO_LPSvsControl_LPS
810	Npas3	4.1069e-21	-0.530155	0.436	0.556	1.04504e-16	Oligo	Bin1cKO_LPSvsControl_LPS
811	Otud7a	4.3204e-21	-0.477797	0.592	0.685	1.09937e-16	Oligo	Bin1cKO_LPSvsControl_LPS
812	Reep5	4.3558e-21	0.56979	0.475	0.352	1.10838e-16	Oligo	Bin1cKO_LPSvsControl_LPS
813	Hsp90aa1	7.97491e-21	0.857219	0.363	0.256	2.02929e-16	Oligo	Bin1cKO_LPSvsControl_LPS
814	Cd9	4.64819e-20	0.652706	0.487	0.386	1.18278e-15	Oligo	Bin1cKO_LPSvsControl_LPS
815	Trf	1.10924e-19	0.286162	0.932	0.908	2.82258e-15	Oligo	Bin1cKO_LPSvsControl_LPS
816	Hecw2	6.19453e-19	-0.272542	0.891	0.925	1.57626e-14	Oligo	Bin1cKO_LPSvsControl_LPS
817	Rplp1	8.55194e-19	1.09154	0.167	0.085	2.17613e-14	Oligo	Bin1cKO_LPSvsControl_LPS
818	Hspa5	2.5439e-18	1.10107	0.178	0.095	6.4732e-14	Oligo	Bin1cKO_LPSvsControl_LPS
819	Ptma	2.78455e-18	0.628728	0.503	0.411	7.08557e-14	Oligo	Bin1cKO_LPSvsControl_LPS
820	Cnp	1.32406e-17	0.544803	0.571	0.478	3.36921e-13	Oligo	Bin1cKO_LPSvsControl_LPS
821	Ubb	1.4984e-17	0.7693	0.297	0.199	3.81284e-13	Oligo	Bin1cKO_LPSvsControl_LPS
822	Ppia	1.90172e-17	0.85097	0.313	0.218	4.83913e-13	Oligo	Bin1cKO_LPSvsControl_LPS
823	Mt1	3.09042e-17	1.01911	0.178	0.096	7.86388e-13	Oligo	Bin1cKO_LPSvsControl_LPS
824	C030029H02Rik	6.71736e-17	-0.348088	0.628	0.723	1.7093e-12	Oligo	Bin1cKO_LPSvsControl_LPS
825	Cd81	1.04509e-16	0.433354	0.666	0.582	2.65933e-12	Oligo	Bin1cKO_LPSvsControl_LPS
826	Dbi	1.4119e-16	0.874374	0.276	0.185	3.59272e-12	Oligo	Bin1cKO_LPSvsControl_LPS
827	Gm16168	1.67936e-16	-0.328191	0.737	0.821	4.27329e-12	Oligo	Bin1cKO_LPSvsControl_LPS
828	Eml1	5.60389e-16	-0.550794	0.242	0.347	1.42596e-11	Oligo	Bin1cKO_LPSvsControl_LPS
829	A230001M10Rik	7.58223e-16	-0.495094	0.397	0.502	1.92937e-11	Oligo	Bin1cKO_LPSvsControl_LPS
830	Stxbp6	1.08504e-15	0.349206	0.706	0.622	2.76099e-11	Oligo	Bin1cKO_LPSvsControl_LPS
831	Ppp1r14a	1.22004e-15	0.589798	0.438	0.344	3.10452e-11	Oligo	Bin1cKO_LPSvsControl_LPS
832	Slc6a1	2.26925e-15	-0.453918	0.318	0.429	5.77434e-11	Oligo	Bin1cKO_LPSvsControl_LPS
833	Cldn11	2.6294e-15	0.31769	0.814	0.751	6.69078e-11	Oligo	Bin1cKO_LPSvsControl_LPS
834	Hspa8	3.0711e-15	0.752637	0.257	0.168	7.81471e-11	Oligo	Bin1cKO_LPSvsControl_LPS
835	Tmsb4x	3.17179e-15	0.889716	0.254	0.169	8.07093e-11	Oligo	Bin1cKO_LPSvsControl_LPS
836	9330175M20Rik	6.79949e-15	-0.80947	0.153	0.24	1.7302e-10	Oligo	Bin1cKO_LPSvsControl_LPS
837	Rpl15	7.33036e-15	1.1988	0.125	0.062	1.86528e-10	Oligo	Bin1cKO_LPSvsControl_LPS
838	Rpl28	9.1334e-15	1.03546	0.154	0.084	2.32408e-10	Oligo	Bin1cKO_LPSvsControl_LPS
839	Fau	1.27112e-14	0.904292	0.197	0.119	3.2345e-10	Oligo	Bin1cKO_LPSvsControl_LPS
840	Rps10	1.3196e-14	0.9693	0.172	0.1	3.35785e-10	Oligo	Bin1cKO_LPSvsControl_LPS
841	Rps5	1.80253e-14	1.26369	0.115	0.055	4.58673e-10	Oligo	Bin1cKO_LPSvsControl_LPS
842	Ctdspl	2.54104e-14	-0.869135	0.094	0.168	6.46592e-10	Oligo	Bin1cKO_LPSvsControl_LPS
843	Rpl30	9.05074e-14	0.993827	0.137	0.073	2.30305e-09	Oligo	Bin1cKO_LPSvsControl_LPS
844	Gpx4	1.07251e-13	0.87432	0.19	0.117	2.72911e-09	Oligo	Bin1cKO_LPSvsControl_LPS
845	Calr	1.07714e-13	1.05045	0.139	0.076	2.74089e-09	Oligo	Bin1cKO_LPSvsControl_LPS
846	Sec11c	1.48993e-13	0.647036	0.305	0.218	3.79128e-09	Oligo	Bin1cKO_LPSvsControl_LPS
847	Gm816	2.00872e-13	-1.17224	0.05	0.107	5.11139e-09	Oligo	Bin1cKO_LPSvsControl_LPS
848	Mast3	2.10198e-13	-0.274138	0.758	0.808	5.34869e-09	Oligo	Bin1cKO_LPSvsControl_LPS
849	Gm47664	2.12493e-13	-1.09511	0.053	0.112	5.40709e-09	Oligo	Bin1cKO_LPSvsControl_LPS
850	Rps27a	4.18079e-13	1.07076	0.142	0.079	1.06384e-08	Oligo	Bin1cKO_LPSvsControl_LPS
851	Tpt1	4.7907e-13	0.951535	0.174	0.105	1.21904e-08	Oligo	Bin1cKO_LPSvsControl_LPS
852	Rpl37a	5.26192e-13	1.21975	0.104	0.051	1.33895e-08	Oligo	Bin1cKO_LPSvsControl_LPS
853	Eif1	5.52625e-13	0.708738	0.255	0.173	1.40621e-08	Oligo	Bin1cKO_LPSvsControl_LPS
854	Rps8	1.31788e-12	0.781326	0.23	0.154	3.35347e-08	Oligo	Bin1cKO_LPSvsControl_LPS
855	Rpl21	1.39473e-12	1.16222	0.107	0.053	3.54904e-08	Oligo	Bin1cKO_LPSvsControl_LPS
856	Rpl18a	1.45791e-12	1.03927	0.124	0.066	3.7098e-08	Oligo	Bin1cKO_LPSvsControl_LPS
857	Ddx5	1.60886e-12	0.266891	0.825	0.786	4.0939e-08	Oligo	Bin1cKO_LPSvsControl_LPS
858	Rnf13	1.72782e-12	0.297997	0.696	0.634	4.39662e-08	Oligo	Bin1cKO_LPSvsControl_LPS
859	Stmn4	1.77368e-12	0.358406	0.556	0.472	4.5133e-08	Oligo	Bin1cKO_LPSvsControl_LPS
860	Calm1	2.74526e-12	0.861086	0.194	0.124	6.9856e-08	Oligo	Bin1cKO_LPSvsControl_LPS
861	Polr3e	4.99358e-12	-0.458141	0.392	0.48	1.27067e-07	Oligo	Bin1cKO_LPSvsControl_LPS
862	Evi2a	8.37288e-12	0.520536	0.31	0.227	2.13056e-07	Oligo	Bin1cKO_LPSvsControl_LPS
863	Stmn1	1.62034e-11	0.540501	0.406	0.328	4.12311e-07	Oligo	Bin1cKO_LPSvsControl_LPS
864	Stard13	2.55674e-11	-0.267383	0.637	0.715	6.50589e-07	Oligo	Bin1cKO_LPSvsControl_LPS
865	Rpl23	3.34206e-11	0.908005	0.115	0.062	8.50421e-07	Oligo	Bin1cKO_LPSvsControl_LPS
866	Sec62	3.94056e-11	0.540381	0.364	0.284	1.00271e-06	Oligo	Bin1cKO_LPSvsControl_LPS
867	Ftl1	4.83582e-11	0.871865	0.147	0.088	1.23052e-06	Oligo	Bin1cKO_LPSvsControl_LPS
868	Kctd3	6.96139e-11	-0.351793	0.388	0.48	1.77139e-06	Oligo	Bin1cKO_LPSvsControl_LPS
869	Rpl8	7.84599e-11	0.890973	0.143	0.085	1.99649e-06	Oligo	Bin1cKO_LPSvsControl_LPS
870	Rpsa	9.30569e-11	0.666673	0.21	0.142	2.36793e-06	Oligo	Bin1cKO_LPSvsControl_LPS
871	Chchd2	1.01214e-10	1.0977	0.115	0.064	2.5755e-06	Oligo	Bin1cKO_LPSvsControl_LPS
872	Tmbim6	1.16048e-10	0.507931	0.325	0.248	2.95296e-06	Oligo	Bin1cKO_LPSvsControl_LPS
873	Cmss1	2.17499e-10	0.475517	0.42	0.346	5.53448e-06	Oligo	Bin1cKO_LPSvsControl_LPS
874	Rpl3	2.95793e-10	0.898209	0.121	0.069	7.52675e-06	Oligo	Bin1cKO_LPSvsControl_LPS
875	Tmed10	3.02714e-10	0.510636	0.283	0.207	7.70286e-06	Oligo	Bin1cKO_LPSvsControl_LPS
876	Ypel2	3.33898e-10	0.260367	0.781	0.734	8.49637e-06	Oligo	Bin1cKO_LPSvsControl_LPS
877	Rnasek	3.79953e-10	0.845254	0.133	0.079	9.66827e-06	Oligo	Bin1cKO_LPSvsControl_LPS
878	Zfand4	4.28518e-10	-0.72226	0.136	0.202	1.09041e-05	Oligo	Bin1cKO_LPSvsControl_LPS
879	Macf1	4.39081e-10	-0.300695	0.45	0.54	1.11729e-05	Oligo	Bin1cKO_LPSvsControl_LPS
880	Cd63	5.45593e-10	0.903694	0.136	0.082	1.38832e-05	Oligo	Bin1cKO_LPSvsControl_LPS
881	9330199G10Rik	7.5371e-10	-0.885833	0.089	0.146	1.91789e-05	Oligo	Bin1cKO_LPSvsControl_LPS
882	Degs1	7.67106e-10	0.49398	0.262	0.189	1.95198e-05	Oligo	Bin1cKO_LPSvsControl_LPS
883	Snx24	9.05492e-10	-0.478265	0.272	0.349	2.30411e-05	Oligo	Bin1cKO_LPSvsControl_LPS
884	Cox4i1	9.3069e-10	0.755908	0.183	0.123	2.36823e-05	Oligo	Bin1cKO_LPSvsControl_LPS
885	Slc25a4	1.08244e-09	0.766678	0.191	0.131	2.75437e-05	Oligo	Bin1cKO_LPSvsControl_LPS
886	Gm48370	1.14241e-09	-0.526516	0.209	0.283	2.90699e-05	Oligo	Bin1cKO_LPSvsControl_LPS
887	Cox6c	1.58148e-09	0.924785	0.121	0.071	4.02423e-05	Oligo	Bin1cKO_LPSvsControl_LPS
888	Rplp0	2.0974e-09	1.01908	0.1	0.055	5.33704e-05	Oligo	Bin1cKO_LPSvsControl_LPS
889	Scd1	2.60998e-09	0.849566	0.113	0.065	6.64135e-05	Oligo	Bin1cKO_LPSvsControl_LPS
890	Ahsa2	3.21488e-09	0.694431	0.17	0.113	8.1806e-05	Oligo	Bin1cKO_LPSvsControl_LPS
891	Rpl27a	3.52268e-09	0.71066	0.167	0.11	8.96382e-05	Oligo	Bin1cKO_LPSvsControl_LPS
892	Selenos	3.57692e-09	0.652767	0.181	0.121	9.10183e-05	Oligo	Bin1cKO_LPSvsControl_LPS
893	Dennd2a	3.58654e-09	-0.883486	0.063	0.111	9.12631e-05	Oligo	Bin1cKO_LPSvsControl_LPS
894	Klf9	4.3095e-09	-0.479203	0.22	0.293	0.000109659	Oligo	Bin1cKO_LPSvsControl_LPS
895	Rps16	6.73518e-09	0.941174	0.102	0.058	0.000171383	Oligo	Bin1cKO_LPSvsControl_LPS
896	Cmtm5	7.42502e-09	0.437872	0.382	0.311	0.000188937	Oligo	Bin1cKO_LPSvsControl_LPS
897	Ubash3b	9.80716e-09	-0.335716	0.347	0.427	0.000249553	Oligo	Bin1cKO_LPSvsControl_LPS
898	Dnaja1	1.07832e-08	0.809716	0.152	0.1	0.000274391	Oligo	Bin1cKO_LPSvsControl_LPS
899	T2	1.21898e-08	-0.86154	0.059	0.103	0.000310181	Oligo	Bin1cKO_LPSvsControl_LPS
900	Rpl17	1.23407e-08	0.884143	0.103	0.06	0.00031402	Oligo	Bin1cKO_LPSvsControl_LPS
901	Rpl19	1.32128e-08	0.819107	0.127	0.079	0.000336212	Oligo	Bin1cKO_LPSvsControl_LPS
902	Rpl24	1.46237e-08	0.792234	0.133	0.084	0.000372116	Oligo	Bin1cKO_LPSvsControl_LPS
903	Fkbp1a	1.61543e-08	0.498976	0.265	0.199	0.000411063	Oligo	Bin1cKO_LPSvsControl_LPS
904	9330182L06Rik	1.94747e-08	-0.447791	0.269	0.337	0.000495554	Oligo	Bin1cKO_LPSvsControl_LPS
905	Prdx1	2.07498e-08	0.461227	0.321	0.254	0.000527999	Oligo	Bin1cKO_LPSvsControl_LPS
906	Prnp	2.22113e-08	0.458372	0.3	0.234	0.000565188	Oligo	Bin1cKO_LPSvsControl_LPS
907	Grm7	2.42258e-08	-0.455668	0.491	0.557	0.000616449	Oligo	Bin1cKO_LPSvsControl_LPS
908	Pdia3	2.77327e-08	0.663513	0.179	0.124	0.000705687	Oligo	Bin1cKO_LPSvsControl_LPS
909	Gm38304	2.77554e-08	-0.356484	0.388	0.462	0.000706264	Oligo	Bin1cKO_LPSvsControl_LPS
910	Adcy10	2.89197e-08	-0.990326	0.057	0.1	0.00073589	Oligo	Bin1cKO_LPSvsControl_LPS
911	Gm29536	3.22754e-08	-0.730869	0.087	0.136	0.000821279	Oligo	Bin1cKO_LPSvsControl_LPS
912	Cox8a	3.46416e-08	0.797266	0.138	0.089	0.00088149	Oligo	Bin1cKO_LPSvsControl_LPS
913	Fkbp5	3.73856e-08	-0.367427	0.319	0.388	0.000951315	Oligo	Bin1cKO_LPSvsControl_LPS
914	Galnt5	3.78055e-08	-0.412748	0.249	0.319	0.000961998	Oligo	Bin1cKO_LPSvsControl_LPS
915	Aldoa	4.0666e-08	0.749214	0.131	0.083	0.00103479	Oligo	Bin1cKO_LPSvsControl_LPS
916	Cdk5rap2	5.55339e-08	-0.390291	0.221	0.29	0.00141312	Oligo	Bin1cKO_LPSvsControl_LPS
917	Pcsk1n	6.1737e-08	0.720473	0.145	0.097	0.00157096	Oligo	Bin1cKO_LPSvsControl_LPS
918	Gm44866	6.47803e-08	-0.33559	0.415	0.488	0.0016484	Oligo	Bin1cKO_LPSvsControl_LPS
919	Amy1	6.87106e-08	-0.519292	0.169	0.229	0.00174841	Oligo	Bin1cKO_LPSvsControl_LPS
920	Abtb2	8.09353e-08	-0.51541	0.15	0.209	0.00205948	Oligo	Bin1cKO_LPSvsControl_LPS
921	4930420G21Rik	8.40278e-08	-0.409961	0.295	0.362	0.00213817	Oligo	Bin1cKO_LPSvsControl_LPS
922	Hsph1	8.78361e-08	0.782162	0.123	0.078	0.00223508	Oligo	Bin1cKO_LPSvsControl_LPS
923	Ankrd13a	8.91359e-08	-0.38913	0.21	0.277	0.00226815	Oligo	Bin1cKO_LPSvsControl_LPS
924	Rpl11	9.09688e-08	0.653758	0.156	0.106	0.00231479	Oligo	Bin1cKO_LPSvsControl_LPS
925	Pllp	9.2273e-08	0.413292	0.358	0.292	0.00234798	Oligo	Bin1cKO_LPSvsControl_LPS
926	Slco3a1	9.8587e-08	-0.353542	0.333	0.404	0.00250865	Oligo	Bin1cKO_LPSvsControl_LPS
927	Sgk3	1.02094e-07	-0.404751	0.313	0.381	0.00259789	Oligo	Bin1cKO_LPSvsControl_LPS
928	Ckb	1.04309e-07	0.515925	0.332	0.272	0.00265425	Oligo	Bin1cKO_LPSvsControl_LPS
929	Rhob	1.04819e-07	0.586789	0.222	0.166	0.00266723	Oligo	Bin1cKO_LPSvsControl_LPS
930	Gm32036	1.18692e-07	-0.450862	0.208	0.272	0.00302023	Oligo	Bin1cKO_LPSvsControl_LPS
931	Adamts6	1.19744e-07	-0.642459	0.135	0.189	0.00304699	Oligo	Bin1cKO_LPSvsControl_LPS
932	Rps3a1	1.24302e-07	0.836558	0.129	0.084	0.00316299	Oligo	Bin1cKO_LPSvsControl_LPS
933	Igsf11	1.28248e-07	-0.328803	0.334	0.408	0.00326339	Oligo	Bin1cKO_LPSvsControl_LPS
934	Gm12145	1.60646e-07	-0.855249	0.074	0.117	0.0040878	Oligo	Bin1cKO_LPSvsControl_LPS
935	Rpl18	1.6886e-07	0.741348	0.15	0.102	0.00429682	Oligo	Bin1cKO_LPSvsControl_LPS
936	9330159F19Rik	1.80305e-07	-0.298924	0.442	0.514	0.00458803	Oligo	Bin1cKO_LPSvsControl_LPS
937	Gab2	1.81027e-07	-0.685927	0.147	0.2	0.0046064	Oligo	Bin1cKO_LPSvsControl_LPS
938	A330049N07Rik	2.43805e-07	-0.29948	0.371	0.448	0.00620387	Oligo	Bin1cKO_LPSvsControl_LPS
939	Opcml	2.57894e-07	-0.304051	0.318	0.382	0.00656238	Oligo	Bin1cKO_LPSvsControl_LPS
940	Rps2	2.63388e-07	0.705428	0.159	0.111	0.00670216	Oligo	Bin1cKO_LPSvsControl_LPS
941	Tyro3	2.95181e-07	0.474628	0.222	0.166	0.00751117	Oligo	Bin1cKO_LPSvsControl_LPS
942	Fabp5	3.07474e-07	0.767545	0.113	0.071	0.00782399	Oligo	Bin1cKO_LPSvsControl_LPS
943	Rps9	3.48198e-07	0.72784	0.114	0.073	0.00886024	Oligo	Bin1cKO_LPSvsControl_LPS
944	Gapdh	3.55399e-07	0.753673	0.113	0.072	0.00904347	Oligo	Bin1cKO_LPSvsControl_LPS
945	Nxpe4	4.02459e-07	-0.553417	0.134	0.187	0.010241	Oligo	Bin1cKO_LPSvsControl_LPS
946	Scd3	4.25014e-07	-0.583542	0.171	0.224	0.0108149	Oligo	Bin1cKO_LPSvsControl_LPS
947	Nfix	5.68786e-07	0.329713	0.473	0.415	0.0144733	Oligo	Bin1cKO_LPSvsControl_LPS
948	Ankub1	6.2765e-07	-0.341227	0.278	0.343	0.0159712	Oligo	Bin1cKO_LPSvsControl_LPS
949	Ywhaq	6.8609e-07	0.262415	0.619	0.58	0.0174582	Oligo	Bin1cKO_LPSvsControl_LPS
950	P4ha1	7.18255e-07	0.516455	0.216	0.163	0.0182767	Oligo	Bin1cKO_LPSvsControl_LPS
951	Tmem88b	7.7754e-07	0.406191	0.27	0.21	0.0197853	Oligo	Bin1cKO_LPSvsControl_LPS
952	Gm3448	8.3784e-07	-0.411323	0.184	0.243	0.0213197	Oligo	Bin1cKO_LPSvsControl_LPS
953	Taldo1	8.63322e-07	0.392383	0.344	0.286	0.0219681	Oligo	Bin1cKO_LPSvsControl_LPS
954	Rnf7	8.65337e-07	0.548817	0.186	0.136	0.0220194	Oligo	Bin1cKO_LPSvsControl_LPS
955	Pla2g3	8.9772e-07	-0.495674	0.14	0.192	0.0228434	Oligo	Bin1cKO_LPSvsControl_LPS
956	Faim2	9.36291e-07	0.613141	0.146	0.1	0.0238249	Oligo	Bin1cKO_LPSvsControl_LPS
957	Ikzf2	9.47419e-07	-0.268987	0.315	0.384	0.024108	Oligo	Bin1cKO_LPSvsControl_LPS
958	Psap	1.01032e-06	0.402902	0.334	0.276	0.0257087	Oligo	Bin1cKO_LPSvsControl_LPS
959	Onecut2	1.01448e-06	-0.633898	0.096	0.141	0.0258145	Oligo	Bin1cKO_LPSvsControl_LPS
960	Trim59	1.01941e-06	0.29191	0.429	0.363	0.0259399	Oligo	Bin1cKO_LPSvsControl_LPS
961	St13	1.03922e-06	0.479636	0.183	0.133	0.0264441	Oligo	Bin1cKO_LPSvsControl_LPS
962	Rabac1	1.06126e-06	0.575796	0.198	0.147	0.0270049	Oligo	Bin1cKO_LPSvsControl_LPS
963	Gm48249	1.20324e-06	-0.274068	0.439	0.504	0.0306177	Oligo	Bin1cKO_LPSvsControl_LPS
964	Actb	1.30173e-06	0.440564	0.504	0.469	0.0331238	Oligo	Bin1cKO_LPSvsControl_LPS
965	Selenok	1.36404e-06	0.492124	0.221	0.17	0.0347093	Oligo	Bin1cKO_LPSvsControl_LPS
966	Rps3	1.48216e-06	0.779893	0.108	0.07	0.0377151	Oligo	Bin1cKO_LPSvsControl_LPS
967	H2afj	1.53528e-06	0.483229	0.227	0.175	0.0390667	Oligo	Bin1cKO_LPSvsControl_LPS
968	Rps13	1.57704e-06	0.725445	0.101	0.064	0.0401294	Oligo	Bin1cKO_LPSvsControl_LPS
969	Rps24	1.58607e-06	0.780537	0.122	0.082	0.0403592	Oligo	Bin1cKO_LPSvsControl_LPS
970	Hmgb1	1.67615e-06	0.539495	0.225	0.173	0.0426513	Oligo	Bin1cKO_LPSvsControl_LPS
971	Epb41l4b	1.77996e-06	-0.483724	0.143	0.194	0.0452929	Oligo	Bin1cKO_LPSvsControl_LPS
972	Mertk	6.10533e-10	-1.08898	0.354	0.665	1.55356e-05	OPCs	Bin1cKO_LPSvsControl_LPS
973	Vcan	7.23035e-09	-0.532576	0.943	1	0.000183984	OPCs	Bin1cKO_LPSvsControl_LPS
974	Pdia6	3.14698e-08	1.79398	0.345	0.104	0.000800781	OPCs	Bin1cKO_LPSvsControl_LPS
975	Hspa5	7.91984e-08	1.89032	0.31	0.085	0.00201528	OPCs	Bin1cKO_LPSvsControl_LPS
976	Dnm3	2.6474e-07	0.504586	0.948	0.866	0.00673657	OPCs	Bin1cKO_LPSvsControl_LPS
977	Malat1	1.05478e-65	-0.682935	0.999	1	2.68398e-61	Micro	Bin1cKO_LPSvsControl_LPS
978	B2m	1.5113e-24	1.03749	0.586	0.36	3.84566e-20	Micro	Bin1cKO_LPSvsControl_LPS
979	Gm42047	4.75485e-23	2.21797	0.226	0.059	1.20992e-18	Micro	Bin1cKO_LPSvsControl_LPS
980	Slc15a2	2.26226e-21	-1.35519	0.226	0.428	5.75654e-17	Micro	Bin1cKO_LPSvsControl_LPS
981	Top2a	1.58981e-19	2.20894	0.153	0.026	4.04544e-15	Micro	Bin1cKO_LPSvsControl_LPS
982	Saa3	1.01983e-18	3.56252	0.156	0.032	2.59506e-14	Micro	Bin1cKO_LPSvsControl_LPS
983	Knl1	1.50747e-18	1.97689	0.148	0.026	3.8359e-14	Micro	Bin1cKO_LPSvsControl_LPS
984	Fkbp5	1.11645e-17	-0.692573	0.616	0.744	2.84092e-13	Micro	Bin1cKO_LPSvsControl_LPS
985	Fth1	1.88076e-17	1.23562	0.363	0.179	4.78578e-13	Micro	Bin1cKO_LPSvsControl_LPS
986	Aoah	2.30891e-17	1.58916	0.222	0.075	5.87524e-13	Micro	Bin1cKO_LPSvsControl_LPS
987	Itm2b	3.63802e-17	0.430531	0.955	0.883	9.2573e-13	Micro	Bin1cKO_LPSvsControl_LPS
988	Diaph3	2.35132e-16	1.96017	0.151	0.034	5.98318e-12	Micro	Bin1cKO_LPSvsControl_LPS
989	Pid1	2.50902e-16	0.551887	0.833	0.695	6.38445e-12	Micro	Bin1cKO_LPSvsControl_LPS
990	Kif11	2.97684e-16	2.11755	0.137	0.027	7.57486e-12	Micro	Bin1cKO_LPSvsControl_LPS
991	C1qa	4.80195e-16	0.416123	0.958	0.907	1.2219e-11	Micro	Bin1cKO_LPSvsControl_LPS
992	Cd52	9.68008e-16	1.69713	0.216	0.079	2.46319e-11	Micro	Bin1cKO_LPSvsControl_LPS
993	Smc4	1.03435e-15	1.78202	0.167	0.046	2.63201e-11	Micro	Bin1cKO_LPSvsControl_LPS
994	Arl6ip1	1.15566e-15	1.42639	0.274	0.12	2.94068e-11	Micro	Bin1cKO_LPSvsControl_LPS
995	Cenpa	3.48768e-15	2.19594	0.143	0.034	8.87475e-11	Micro	Bin1cKO_LPSvsControl_LPS
996	Bst2	4.49907e-15	1.6475	0.185	0.059	1.14483e-10	Micro	Bin1cKO_LPSvsControl_LPS
997	Cenpe	4.54407e-15	1.77484	0.136	0.029	1.15628e-10	Micro	Bin1cKO_LPSvsControl_LPS
998	Lockd	4.62028e-15	1.98291	0.133	0.028	1.17568e-10	Micro	Bin1cKO_LPSvsControl_LPS
999	Camk1d	4.92569e-15	0.398023	0.924	0.853	1.25339e-10	Micro	Bin1cKO_LPSvsControl_LPS
1000	Kif15	7.41783e-15	2.3908	0.142	0.035	1.88754e-10	Micro	Bin1cKO_LPSvsControl_LPS
1001	Cenpf	7.47703e-15	1.3961	0.173	0.052	1.90261e-10	Micro	Bin1cKO_LPSvsControl_LPS
1002	Prc1	8.97277e-15	2.41248	0.132	0.029	2.28321e-10	Micro	Bin1cKO_LPSvsControl_LPS
1003	Bank1	1.23334e-14	-0.892368	0.263	0.442	3.13836e-10	Micro	Bin1cKO_LPSvsControl_LPS
1004	Ccdc88a	2.32771e-14	1.26196	0.246	0.104	5.92308e-10	Micro	Bin1cKO_LPSvsControl_LPS
1005	Ccnf	2.46055e-14	2.14134	0.111	0.019	6.26111e-10	Micro	Bin1cKO_LPSvsControl_LPS
1006	Kif23	3.58713e-14	2.22342	0.121	0.025	9.1278e-10	Micro	Bin1cKO_LPSvsControl_LPS
1007	Exoc4	3.63375e-14	0.704734	0.783	0.671	9.24644e-10	Micro	Bin1cKO_LPSvsControl_LPS
1008	Arid5b	3.69902e-14	0.764493	0.556	0.376	9.41253e-10	Micro	Bin1cKO_LPSvsControl_LPS
1009	Ifi30	3.83937e-14	0.958935	0.378	0.213	9.76967e-10	Micro	Bin1cKO_LPSvsControl_LPS
1010	Ect2	5.72741e-14	2.10216	0.116	0.022	1.4574e-09	Micro	Bin1cKO_LPSvsControl_LPS
1011	Ctsc	6.37375e-14	0.734965	0.552	0.382	1.62186e-09	Micro	Bin1cKO_LPSvsControl_LPS
1012	Ifi204	7.5057e-14	1.08604	0.349	0.189	1.9099e-09	Micro	Bin1cKO_LPSvsControl_LPS
1013	Mki67	1.39095e-13	2.00646	0.125	0.028	3.53941e-09	Micro	Bin1cKO_LPSvsControl_LPS
1014	Rccd1	1.96481e-13	2.07293	0.133	0.034	4.99966e-09	Micro	Bin1cKO_LPSvsControl_LPS
1015	Neil3	2.02691e-13	2.06704	0.103	0.018	5.15768e-09	Micro	Bin1cKO_LPSvsControl_LPS
1016	Smc2	2.12993e-13	2.1332	0.137	0.037	5.41983e-09	Micro	Bin1cKO_LPSvsControl_LPS
1017	Ctsl	2.39788e-13	0.608895	0.729	0.571	6.10163e-09	Micro	Bin1cKO_LPSvsControl_LPS
1018	Anln	3.11251e-13	2.53536	0.102	0.018	7.92009e-09	Micro	Bin1cKO_LPSvsControl_LPS
1019	Ptprc	4.89629e-13	0.377131	0.9	0.856	1.24591e-08	Micro	Bin1cKO_LPSvsControl_LPS
1020	Gm31243	5.74392e-13	-1.12251	0.202	0.353	1.4616e-08	Micro	Bin1cKO_LPSvsControl_LPS
1021	C1qb	7.52084e-13	0.390234	0.929	0.871	1.91375e-08	Micro	Bin1cKO_LPSvsControl_LPS
1022	Tpx2	8.1863e-13	1.9371	0.11	0.022	2.08309e-08	Micro	Bin1cKO_LPSvsControl_LPS
1023	Cit	1.39582e-12	2.20076	0.126	0.033	3.55181e-08	Micro	Bin1cKO_LPSvsControl_LPS
1024	Ccnd3	1.54202e-12	-0.362563	0.854	0.926	3.92383e-08	Micro	Bin1cKO_LPSvsControl_LPS
1025	Hsp90b1	1.7161e-12	0.709206	0.431	0.262	4.36679e-08	Micro	Bin1cKO_LPSvsControl_LPS
1026	Atrnl1	2.71304e-12	1.23929	0.202	0.081	6.9036e-08	Micro	Bin1cKO_LPSvsControl_LPS
1027	H2-K1	3.94635e-12	0.757193	0.53	0.382	1.00419e-07	Micro	Bin1cKO_LPSvsControl_LPS
1028	Prkca	4.15474e-12	-0.606243	0.51	0.625	1.05722e-07	Micro	Bin1cKO_LPSvsControl_LPS
1029	Cpd	4.45992e-12	1.07012	0.222	0.096	1.13487e-07	Micro	Bin1cKO_LPSvsControl_LPS
1030	Ndc80	5.1685e-12	2.15575	0.105	0.022	1.31518e-07	Micro	Bin1cKO_LPSvsControl_LPS
1031	Fyb	7.05537e-12	0.376304	0.95	0.888	1.79531e-07	Micro	Bin1cKO_LPSvsControl_LPS
1032	Dna2	7.15933e-12	1.40604	0.19	0.077	1.82176e-07	Micro	Bin1cKO_LPSvsControl_LPS
1033	Kif4	7.31699e-12	1.9472	0.108	0.025	1.86188e-07	Micro	Bin1cKO_LPSvsControl_LPS
1034	Nusap1	7.77529e-12	1.97248	0.118	0.031	1.9785e-07	Micro	Bin1cKO_LPSvsControl_LPS
1035	Noct	1.32017e-11	-1.1302	0.168	0.301	3.3593e-07	Micro	Bin1cKO_LPSvsControl_LPS
1036	Mis18bp1	1.35863e-11	2.11441	0.115	0.029	3.45718e-07	Micro	Bin1cKO_LPSvsControl_LPS
1037	Lrmda	1.65636e-11	0.370491	0.934	0.93	4.21477e-07	Micro	Bin1cKO_LPSvsControl_LPS
1038	Actb	1.88826e-11	0.750497	0.478	0.325	4.80487e-07	Micro	Bin1cKO_LPSvsControl_LPS
1039	Akt3	1.95311e-11	1.18694	0.294	0.162	4.96988e-07	Micro	Bin1cKO_LPSvsControl_LPS
1040	Ctsz	1.96792e-11	0.524986	0.717	0.584	5.00758e-07	Micro	Bin1cKO_LPSvsControl_LPS
1041	C2cd5	3.23237e-11	1.4341	0.166	0.062	8.22509e-07	Micro	Bin1cKO_LPSvsControl_LPS
1042	Arhgap15	3.71675e-11	0.694841	0.246	0.117	9.45765e-07	Micro	Bin1cKO_LPSvsControl_LPS
1043	Gm26740	4.46811e-11	0.489415	0.611	0.446	1.13695e-06	Micro	Bin1cKO_LPSvsControl_LPS
1044	Cenpp	4.60621e-11	1.63759	0.197	0.087	1.1721e-06	Micro	Bin1cKO_LPSvsControl_LPS
1045	Atad2	4.80328e-11	1.98735	0.148	0.053	1.22224e-06	Micro	Bin1cKO_LPSvsControl_LPS
1046	Ezh2	8.04756e-11	1.84934	0.143	0.051	2.04778e-06	Micro	Bin1cKO_LPSvsControl_LPS
1047	Ptma	9.98269e-11	1.42202	0.161	0.061	2.5402e-06	Micro	Bin1cKO_LPSvsControl_LPS
1048	Ly6e	1.29568e-10	0.632688	0.565	0.438	3.29698e-06	Micro	Bin1cKO_LPSvsControl_LPS
1049	Fat3	1.66745e-10	0.70072	0.519	0.368	4.24298e-06	Micro	Bin1cKO_LPSvsControl_LPS
1050	Gm10790	2.00688e-10	-0.430197	0.762	0.837	5.1067e-06	Micro	Bin1cKO_LPSvsControl_LPS
1051	Gm4316	2.37532e-10	1.52247	0.152	0.058	6.04424e-06	Micro	Bin1cKO_LPSvsControl_LPS
1052	Ifitm10	2.59274e-10	-0.567499	0.424	0.573	6.59748e-06	Micro	Bin1cKO_LPSvsControl_LPS
1053	C1qc	3.43084e-10	0.304226	0.954	0.92	8.73012e-06	Micro	Bin1cKO_LPSvsControl_LPS
1054	Cd63	3.81231e-10	0.893259	0.282	0.154	9.7008e-06	Micro	Bin1cKO_LPSvsControl_LPS
1055	Siglech	4.63212e-10	-0.358562	0.8	0.837	1.17869e-05	Micro	Bin1cKO_LPSvsControl_LPS
1056	Kif20b	4.66637e-10	1.72735	0.112	0.033	1.18741e-05	Micro	Bin1cKO_LPSvsControl_LPS
1057	Kif18a	6.06758e-10	2.106	0.105	0.029	1.54396e-05	Micro	Bin1cKO_LPSvsControl_LPS
1058	Cbx5	6.07045e-10	1.97663	0.128	0.045	1.54469e-05	Micro	Bin1cKO_LPSvsControl_LPS
1059	Rsrp1	7.21564e-10	-0.335423	0.815	0.881	1.83609e-05	Micro	Bin1cKO_LPSvsControl_LPS
1060	Csf2ra	9.14296e-10	0.72092	0.378	0.241	2.32652e-05	Micro	Bin1cKO_LPSvsControl_LPS
1061	Ppm1h	1.13879e-09	0.390064	0.88	0.783	2.89776e-05	Micro	Bin1cKO_LPSvsControl_LPS
1062	Cd72	2.03725e-09	1.80293	0.11	0.034	5.18398e-05	Micro	Bin1cKO_LPSvsControl_LPS
1063	AY036118	2.1269e-09	0.368712	0.882	0.797	5.4121e-05	Micro	Bin1cKO_LPSvsControl_LPS
1064	A330040F15Rik	2.26448e-09	1.04927	0.299	0.182	5.76219e-05	Micro	Bin1cKO_LPSvsControl_LPS
1065	Fcgr2b	3.23612e-09	0.594529	0.388	0.25	8.23463e-05	Micro	Bin1cKO_LPSvsControl_LPS
1066	Mat2a	3.52077e-09	1.34895	0.153	0.064	8.95894e-05	Micro	Bin1cKO_LPSvsControl_LPS
1067	Sp100	3.77539e-09	0.849849	0.279	0.159	9.60685e-05	Micro	Bin1cKO_LPSvsControl_LPS
1068	Lgmn	4.29694e-09	0.288267	0.933	0.871	0.00010934	Micro	Bin1cKO_LPSvsControl_LPS
1069	Smyd3	4.94603e-09	-0.483978	0.479	0.588	0.000125857	Micro	Bin1cKO_LPSvsControl_LPS
1070	Gm40841	5.01193e-09	-0.982034	0.158	0.272	0.000127534	Micro	Bin1cKO_LPSvsControl_LPS
1071	Gm7480	6.00622e-09	0.74166	0.418	0.295	0.000152834	Micro	Bin1cKO_LPSvsControl_LPS
1072	H2-D1	6.02839e-09	0.589603	0.545	0.415	0.000153398	Micro	Bin1cKO_LPSvsControl_LPS
1073	Efcab11	6.16077e-09	1.72047	0.126	0.047	0.000156767	Micro	Bin1cKO_LPSvsControl_LPS
1074	Incenp	7.97745e-09	1.68618	0.122	0.045	0.000202994	Micro	Bin1cKO_LPSvsControl_LPS
1075	Lgals3bp	1.01789e-08	0.821375	0.258	0.145	0.000259013	Micro	Bin1cKO_LPSvsControl_LPS
1076	Cd9	1.19051e-08	0.446977	0.584	0.446	0.000302938	Micro	Bin1cKO_LPSvsControl_LPS
1077	Rpsa	1.48412e-08	0.966642	0.224	0.119	0.000377648	Micro	Bin1cKO_LPSvsControl_LPS
1078	Cx3cr1	1.69291e-08	-0.289594	0.833	0.869	0.000430777	Micro	Bin1cKO_LPSvsControl_LPS
1079	Olfml3	2.01687e-08	0.638457	0.387	0.261	0.000513212	Micro	Bin1cKO_LPSvsControl_LPS
1080	Stat1	2.36442e-08	0.81655	0.329	0.21	0.000601651	Micro	Bin1cKO_LPSvsControl_LPS
1081	Lat2	2.77545e-08	0.999325	0.234	0.133	0.00070624	Micro	Bin1cKO_LPSvsControl_LPS
1082	Srsf5	2.80179e-08	-0.506002	0.46	0.566	0.000712943	Micro	Bin1cKO_LPSvsControl_LPS
1083	3222401L13Rik	3.04461e-08	-0.919538	0.101	0.199	0.000774731	Micro	Bin1cKO_LPSvsControl_LPS
1084	Lifr	3.22566e-08	-0.879712	0.165	0.276	0.000820802	Micro	Bin1cKO_LPSvsControl_LPS
1085	Zc3hav1	3.90401e-08	0.689441	0.36	0.243	0.000993414	Micro	Bin1cKO_LPSvsControl_LPS
1086	Plek	5.26282e-08	0.600262	0.485	0.369	0.00133918	Micro	Bin1cKO_LPSvsControl_LPS
1087	Parp14	5.29585e-08	0.844201	0.35	0.232	0.00134758	Micro	Bin1cKO_LPSvsControl_LPS
1088	Fhit	5.46556e-08	-0.602438	0.424	0.545	0.00139077	Micro	Bin1cKO_LPSvsControl_LPS
1089	Rps2	5.95784e-08	0.964581	0.232	0.132	0.00151603	Micro	Bin1cKO_LPSvsControl_LPS
1090	Ppib	5.9923e-08	0.952454	0.178	0.086	0.0015248	Micro	Bin1cKO_LPSvsControl_LPS
1091	Zeb2	7.39192e-08	0.252707	0.964	0.933	0.00188095	Micro	Bin1cKO_LPSvsControl_LPS
1092	Kif24	7.54581e-08	1.83143	0.105	0.038	0.00192011	Micro	Bin1cKO_LPSvsControl_LPS
1093	Lgals9	8.37959e-08	0.567037	0.413	0.284	0.00213227	Micro	Bin1cKO_LPSvsControl_LPS
1094	Pvt1	8.58668e-08	0.607929	0.572	0.459	0.00218497	Micro	Bin1cKO_LPSvsControl_LPS
1095	Ms4a6c	1.00152e-07	0.922096	0.2	0.105	0.00254847	Micro	Bin1cKO_LPSvsControl_LPS
1096	AU020206	1.01665e-07	0.478007	0.626	0.519	0.00258696	Micro	Bin1cKO_LPSvsControl_LPS
1097	Tmpo	1.0354e-07	1.30163	0.217	0.124	0.00263467	Micro	Bin1cKO_LPSvsControl_LPS
1098	Vps54	1.116e-07	0.476558	0.535	0.41	0.00283977	Micro	Bin1cKO_LPSvsControl_LPS
1099	G2e3	1.14125e-07	1.2695	0.166	0.081	0.00290404	Micro	Bin1cKO_LPSvsControl_LPS
1100	Ccdc18	1.20388e-07	1.72029	0.1	0.035	0.00306339	Micro	Bin1cKO_LPSvsControl_LPS
1101	Kctd18	1.29349e-07	1.29406	0.171	0.086	0.00329141	Micro	Bin1cKO_LPSvsControl_LPS
1102	Vmp1	1.35799e-07	0.867218	0.201	0.107	0.00345554	Micro	Bin1cKO_LPSvsControl_LPS
1103	Havcr2	1.48548e-07	0.425747	0.633	0.517	0.00377995	Micro	Bin1cKO_LPSvsControl_LPS
1104	Cntln	1.57573e-07	1.25766	0.157	0.075	0.0040096	Micro	Bin1cKO_LPSvsControl_LPS
1105	Luzp1	1.68781e-07	0.827696	0.227	0.129	0.00429481	Micro	Bin1cKO_LPSvsControl_LPS
1106	Ust	1.84217e-07	0.592258	0.358	0.244	0.0046876	Micro	Bin1cKO_LPSvsControl_LPS
1107	Cenpc1	1.98114e-07	1.09573	0.168	0.084	0.0050412	Micro	Bin1cKO_LPSvsControl_LPS
1108	Ank2	2.03994e-07	-0.40051	0.547	0.654	0.00519083	Micro	Bin1cKO_LPSvsControl_LPS
1109	Uty	2.09257e-07	0.519468	0.502	0.388	0.00532475	Micro	Bin1cKO_LPSvsControl_LPS
1110	Gm13710	2.10223e-07	0.785937	0.38	0.275	0.00534934	Micro	Bin1cKO_LPSvsControl_LPS
1111	Ptpn6	2.45665e-07	0.876448	0.196	0.105	0.0062512	Micro	Bin1cKO_LPSvsControl_LPS
1112	Slc16a10	2.77009e-07	0.742592	0.242	0.143	0.00704878	Micro	Bin1cKO_LPSvsControl_LPS
1113	Gsap	2.90144e-07	0.508278	0.501	0.384	0.00738299	Micro	Bin1cKO_LPSvsControl_LPS
1114	Ctsh	3.3572e-07	0.393652	0.702	0.608	0.00854274	Micro	Bin1cKO_LPSvsControl_LPS
1115	H2afv	3.91061e-07	1.28528	0.135	0.061	0.00995094	Micro	Bin1cKO_LPSvsControl_LPS
1116	Trim30a	4.05265e-07	0.658107	0.496	0.39	0.0103124	Micro	Bin1cKO_LPSvsControl_LPS
1117	Rps8	4.1294e-07	0.734889	0.284	0.18	0.0105077	Micro	Bin1cKO_LPSvsControl_LPS
1118	Cxcl16	5.25467e-07	1.05662	0.146	0.07	0.013371	Micro	Bin1cKO_LPSvsControl_LPS
1119	Pla2g4a	6.29168e-07	0.646156	0.397	0.289	0.0160098	Micro	Bin1cKO_LPSvsControl_LPS
1120	Rbl1	7.03275e-07	1.4215	0.128	0.059	0.0178955	Micro	Bin1cKO_LPSvsControl_LPS
1121	Cep57l1	7.34233e-07	1.06318	0.14	0.066	0.0186833	Micro	Bin1cKO_LPSvsControl_LPS
1122	8030442B05Rik	9.06635e-07	-0.488239	0.488	0.58	0.0230702	Micro	Bin1cKO_LPSvsControl_LPS
1123	Ckap5	9.59676e-07	0.826982	0.3	0.204	0.0244199	Micro	Bin1cKO_LPSvsControl_LPS
1124	Hpgds	1.06451e-06	-0.266567	0.792	0.842	0.0270875	Micro	Bin1cKO_LPSvsControl_LPS
1125	Kcnma1	1.23706e-06	0.572858	0.46	0.353	0.0314783	Micro	Bin1cKO_LPSvsControl_LPS
1126	Pml	1.46445e-06	1.06216	0.191	0.108	0.0372645	Micro	Bin1cKO_LPSvsControl_LPS
1127	Ube2s	1.49219e-06	1.6259	0.101	0.041	0.0379703	Micro	Bin1cKO_LPSvsControl_LPS
1128	Stx16	1.55939e-06	0.47845	0.484	0.375	0.0396803	Micro	Bin1cKO_LPSvsControl_LPS
1129	Pbx3	1.58402e-06	0.626223	0.416	0.309	0.040307	Micro	Bin1cKO_LPSvsControl_LPS
1130	Ifi207	1.76742e-06	1.14542	0.14	0.068	0.0449737	Micro	Bin1cKO_LPSvsControl_LPS
1131	Tap1	1.9024e-06	1.26207	0.11	0.047	0.0484086	Micro	Bin1cKO_LPSvsControl_LPS
1132	Slc10a7	1.91793e-06	0.669329	0.297	0.198	0.0488036	Micro	Bin1cKO_LPSvsControl_LPS
1133	Ifitm3	9.06131e-07	1.73881	0.333	0.126	0.0230574	Peri	Bin1cKO_LPSvsControl_LPS
1134	Phactr1	1.09753e-40	0.750583	0.993	0.795	2.79276e-36	GluNeu	Bin1cKO_PBSvsControl_PBS
1135	Chn2	9.75039e-40	-3.91304	0.084	0.434	2.48108e-35	GluNeu	Bin1cKO_PBSvsControl_PBS
1136	Unc13c	3.70874e-39	-3.23331	0.084	0.441	9.43727e-35	GluNeu	Bin1cKO_PBSvsControl_PBS
1137	Camk2a	8.33014e-38	0.924955	0.958	0.559	2.11969e-33	GluNeu	Bin1cKO_PBSvsControl_PBS
1138	Mdga2	7.67972e-37	0.819042	0.98	0.613	1.95418e-32	GluNeu	Bin1cKO_PBSvsControl_PBS
1139	Gabra6	1.26287e-36	-4.3979	0.013	0.324	3.21349e-32	GluNeu	Bin1cKO_PBSvsControl_PBS
1140	Gria1	1.75507e-36	0.956348	0.887	0.508	4.46595e-32	GluNeu	Bin1cKO_PBSvsControl_PBS
1141	Chd7	4.22241e-36	-3.77834	0.018	0.33	1.07443e-31	GluNeu	Bin1cKO_PBSvsControl_PBS
1142	Zfp521	7.102e-36	-4.27914	0.022	0.333	1.80718e-31	GluNeu	Bin1cKO_PBSvsControl_PBS
1143	Trpm3	2.64642e-35	-2.04927	0.342	0.654	6.73408e-31	GluNeu	Bin1cKO_PBSvsControl_PBS
1144	Dpp10	7.57335e-34	0.876637	0.971	0.677	1.92712e-29	GluNeu	Bin1cKO_PBSvsControl_PBS
1145	Prickle1	1.255e-33	0.827312	0.922	0.542	3.19347e-29	GluNeu	Bin1cKO_PBSvsControl_PBS
1146	Sipa1l1	1.74776e-33	0.804054	0.911	0.625	4.44734e-29	GluNeu	Bin1cKO_PBSvsControl_PBS
1147	Meis1	1.85359e-33	-4.5957	0.011	0.296	4.71663e-29	GluNeu	Bin1cKO_PBSvsControl_PBS
1148	Grik2	5.0886e-33	-1.57536	0.904	0.943	1.29484e-28	GluNeu	Bin1cKO_PBSvsControl_PBS
1149	Lncpint	2.28478e-32	0.673104	0.964	0.785	5.81385e-28	GluNeu	Bin1cKO_PBSvsControl_PBS
1150	Il16	2.7589e-32	-4.70659	0.016	0.295	7.02029e-28	GluNeu	Bin1cKO_PBSvsControl_PBS
1151	Reln	3.50731e-32	-2.88756	0.102	0.415	8.92471e-28	GluNeu	Bin1cKO_PBSvsControl_PBS
1152	Gm2694	3.64945e-32	-3.5004	0.038	0.333	9.2864e-28	GluNeu	Bin1cKO_PBSvsControl_PBS
1153	Grin2b	4.41794e-32	0.761633	0.976	0.594	1.12419e-27	GluNeu	Bin1cKO_PBSvsControl_PBS
1154	Grm5	3.22507e-31	0.805506	0.951	0.579	8.20652e-27	GluNeu	Bin1cKO_PBSvsControl_PBS
1155	Atrnl1	8.47955e-31	0.851327	0.911	0.546	2.15771e-26	GluNeu	Bin1cKO_PBSvsControl_PBS
1156	Cnpy1	2.5225e-30	-4.84316	0.009	0.269	6.41874e-26	GluNeu	Bin1cKO_PBSvsControl_PBS
1157	Trim9	2.57255e-30	0.796383	0.9	0.566	6.54611e-26	GluNeu	Bin1cKO_PBSvsControl_PBS
1158	Fat2	3.40239e-30	-4.40467	0.016	0.279	8.65772e-26	GluNeu	Bin1cKO_PBSvsControl_PBS
1159	Dlg2	1.32892e-29	0.556114	0.998	0.972	3.38156e-25	GluNeu	Bin1cKO_PBSvsControl_PBS
1160	Zbtb20	2.2321e-29	-2.88262	0.118	0.417	5.67981e-25	GluNeu	Bin1cKO_PBSvsControl_PBS
1161	Ptprd	4.05791e-29	0.619721	0.998	0.968	1.03258e-24	GluNeu	Bin1cKO_PBSvsControl_PBS
1162	Sgcz	4.62423e-29	0.788953	0.938	0.554	1.17668e-24	GluNeu	Bin1cKO_PBSvsControl_PBS
1163	Cobl	9.18759e-29	1.04103	0.72	0.377	2.33787e-24	GluNeu	Bin1cKO_PBSvsControl_PBS
1164	Ntrk2	9.68259e-29	0.873811	0.916	0.741	2.46383e-24	GluNeu	Bin1cKO_PBSvsControl_PBS
1165	Lrfn5	1.12541e-28	0.767564	0.936	0.571	2.86372e-24	GluNeu	Bin1cKO_PBSvsControl_PBS
1166	Dpp6	1.26534e-28	-2.04273	0.744	0.832	3.21979e-24	GluNeu	Bin1cKO_PBSvsControl_PBS
1167	Tmem266	1.86989e-28	-3.1369	0.044	0.318	4.75813e-24	GluNeu	Bin1cKO_PBSvsControl_PBS
1168	Tmem163	2.84164e-28	-2.76218	0.096	0.386	7.23084e-24	GluNeu	Bin1cKO_PBSvsControl_PBS
1169	St18	3.35563e-28	-4.55714	0.011	0.258	8.53873e-24	GluNeu	Bin1cKO_PBSvsControl_PBS
1170	Maml2	6.3698e-28	-3.36765	0.056	0.327	1.62086e-23	GluNeu	Bin1cKO_PBSvsControl_PBS
1171	Tenm1	7.29416e-28	-1.5034	0.709	0.826	1.85607e-23	GluNeu	Bin1cKO_PBSvsControl_PBS
1172	Chn1	8.48945e-28	0.852225	0.824	0.463	2.16023e-23	GluNeu	Bin1cKO_PBSvsControl_PBS
1173	Kcnq5	1.14313e-27	0.829285	0.88	0.514	2.9088e-23	GluNeu	Bin1cKO_PBSvsControl_PBS
1174	Klhl29	1.48757e-27	0.820717	0.858	0.549	3.78528e-23	GluNeu	Bin1cKO_PBSvsControl_PBS
1175	Epha5	1.74324e-27	0.841192	0.862	0.539	4.43585e-23	GluNeu	Bin1cKO_PBSvsControl_PBS
1176	Itpr1	1.99426e-27	0.824618	0.844	0.512	5.0746e-23	GluNeu	Bin1cKO_PBSvsControl_PBS
1177	Zic1	2.27693e-27	-3.89761	0.016	0.261	5.79388e-23	GluNeu	Bin1cKO_PBSvsControl_PBS
1178	Kirrel3	5.13056e-27	-1.73532	0.52	0.711	1.30552e-22	GluNeu	Bin1cKO_PBSvsControl_PBS
1179	Slc4a4	5.24206e-27	-1.84198	0.289	0.565	1.33389e-22	GluNeu	Bin1cKO_PBSvsControl_PBS
1180	Kcnd2	5.40945e-27	-1.64865	0.993	0.997	1.37649e-22	GluNeu	Bin1cKO_PBSvsControl_PBS
1181	Sh3rf3	5.42566e-27	1.05957	0.711	0.389	1.38061e-22	GluNeu	Bin1cKO_PBSvsControl_PBS
1182	Gria3	6.19481e-27	0.784609	0.878	0.512	1.57633e-22	GluNeu	Bin1cKO_PBSvsControl_PBS
1183	Tnr	6.62307e-27	0.78148	0.891	0.596	1.68531e-22	GluNeu	Bin1cKO_PBSvsControl_PBS
1184	Dclk1	7.69844e-27	0.590346	0.987	0.795	1.95895e-22	GluNeu	Bin1cKO_PBSvsControl_PBS
1185	Tenm4	8.1199e-27	0.747721	0.893	0.525	2.06619e-22	GluNeu	Bin1cKO_PBSvsControl_PBS
1186	Etv1	8.60923e-27	-2.8579	0.102	0.377	2.1907e-22	GluNeu	Bin1cKO_PBSvsControl_PBS
1187	Syne1	8.96778e-27	-1.2008	0.838	0.914	2.28194e-22	GluNeu	Bin1cKO_PBSvsControl_PBS
1188	Adcy2	1.22391e-26	0.820441	0.822	0.471	3.11436e-22	GluNeu	Bin1cKO_PBSvsControl_PBS
1189	Fgf14	1.85708e-26	-0.730276	1	0.998	4.72552e-22	GluNeu	Bin1cKO_PBSvsControl_PBS
1190	Nlk	2.39459e-26	0.853002	0.862	0.56	6.09327e-22	GluNeu	Bin1cKO_PBSvsControl_PBS
1191	Phf24	2.82753e-26	0.858051	0.798	0.455	7.19493e-22	GluNeu	Bin1cKO_PBSvsControl_PBS
1192	Ror1	3.82803e-26	-4.1617	0.033	0.278	9.74082e-22	GluNeu	Bin1cKO_PBSvsControl_PBS
1193	Agbl4	4.42615e-26	0.686696	0.94	0.59	1.12628e-21	GluNeu	Bin1cKO_PBSvsControl_PBS
1194	Dpf3	5.56627e-26	-3.6344	0.022	0.261	1.41639e-21	GluNeu	Bin1cKO_PBSvsControl_PBS
1195	Nkain2	5.94758e-26	0.677131	0.971	0.616	1.51342e-21	GluNeu	Bin1cKO_PBSvsControl_PBS
1196	9530059O14Rik	6.3091e-26	0.919935	0.76	0.407	1.60541e-21	GluNeu	Bin1cKO_PBSvsControl_PBS
1197	Prickle2	6.79893e-26	0.717518	0.909	0.545	1.73006e-21	GluNeu	Bin1cKO_PBSvsControl_PBS
1198	Astn2	7.56572e-26	-1.44329	0.758	0.832	1.92517e-21	GluNeu	Bin1cKO_PBSvsControl_PBS
1199	Prkca	7.91296e-26	1.11975	0.691	0.38	2.01353e-21	GluNeu	Bin1cKO_PBSvsControl_PBS
1200	Kalrn	1.0961e-25	0.686377	0.973	0.59	2.78913e-21	GluNeu	Bin1cKO_PBSvsControl_PBS
1201	Erbb4	1.67229e-25	-2.77864	0.071	0.338	4.25531e-21	GluNeu	Bin1cKO_PBSvsControl_PBS
1202	Chsy3	2.45167e-25	0.820812	0.831	0.489	6.23851e-21	GluNeu	Bin1cKO_PBSvsControl_PBS
1203	Mef2c	3.79183e-25	0.635124	0.94	0.619	9.6487e-21	GluNeu	Bin1cKO_PBSvsControl_PBS
1204	Pld5	4.52497e-25	-1.89834	0.16	0.451	1.15142e-20	GluNeu	Bin1cKO_PBSvsControl_PBS
1205	Robo2	7.50707e-25	0.759205	0.873	0.535	1.91025e-20	GluNeu	Bin1cKO_PBSvsControl_PBS
1206	Sntg1	7.67757e-25	0.714208	0.938	0.556	1.95363e-20	GluNeu	Bin1cKO_PBSvsControl_PBS
1207	Nav3	1.12649e-24	0.579057	0.987	0.81	2.86648e-20	GluNeu	Bin1cKO_PBSvsControl_PBS
1208	Ank1	1.12836e-24	-2.82219	0.069	0.324	2.87124e-20	GluNeu	Bin1cKO_PBSvsControl_PBS
1209	Frmpd4	1.26895e-24	0.69763	0.936	0.569	3.22896e-20	GluNeu	Bin1cKO_PBSvsControl_PBS
1210	Meg3	1.44037e-24	0.47633	1	0.971	3.66517e-20	GluNeu	Bin1cKO_PBSvsControl_PBS
1211	Dmd	1.5394e-24	0.559487	0.982	0.796	3.91716e-20	GluNeu	Bin1cKO_PBSvsControl_PBS
1212	Khdrbs3	1.55385e-24	0.892197	0.773	0.46	3.95393e-20	GluNeu	Bin1cKO_PBSvsControl_PBS
1213	Lpp	3.40108e-24	-2.7114	0.089	0.346	8.65438e-20	GluNeu	Bin1cKO_PBSvsControl_PBS
1214	Pex5l	4.06586e-24	0.762136	0.838	0.485	1.0346e-19	GluNeu	Bin1cKO_PBSvsControl_PBS
1215	Dlgap2	4.13239e-24	0.662416	0.976	0.59	1.05153e-19	GluNeu	Bin1cKO_PBSvsControl_PBS
1216	Cadps2	4.49848e-24	-1.29932	0.642	0.772	1.14468e-19	GluNeu	Bin1cKO_PBSvsControl_PBS
1217	Etl4	4.6885e-24	0.649813	0.88	0.52	1.19304e-19	GluNeu	Bin1cKO_PBSvsControl_PBS
1218	Gabrb1	4.7402e-24	0.707764	0.918	0.577	1.20619e-19	GluNeu	Bin1cKO_PBSvsControl_PBS
1219	Ptk2	4.77551e-24	0.717293	0.864	0.566	1.21518e-19	GluNeu	Bin1cKO_PBSvsControl_PBS
1220	Grin2c	4.8422e-24	-4.82443	0.007	0.216	1.23215e-19	GluNeu	Bin1cKO_PBSvsControl_PBS
1221	Kcnq3	4.92421e-24	0.706872	0.922	0.6	1.25301e-19	GluNeu	Bin1cKO_PBSvsControl_PBS
1222	Cntn4	5.22191e-24	0.699278	0.898	0.617	1.32877e-19	GluNeu	Bin1cKO_PBSvsControl_PBS
1223	Nrg3os	6.47379e-24	0.654661	0.96	0.596	1.64732e-19	GluNeu	Bin1cKO_PBSvsControl_PBS
1224	Dscam	7.31655e-24	0.753592	0.849	0.515	1.86177e-19	GluNeu	Bin1cKO_PBSvsControl_PBS
1225	Tanc2	8.63612e-24	0.653323	0.96	0.59	2.19755e-19	GluNeu	Bin1cKO_PBSvsControl_PBS
1226	Airn	1.08896e-23	-2.68629	0.087	0.34	2.77096e-19	GluNeu	Bin1cKO_PBSvsControl_PBS
1227	Nrxn1	1.29219e-23	-0.395503	1	0.998	3.28811e-19	GluNeu	Bin1cKO_PBSvsControl_PBS
1228	Plcb1	1.8355e-23	0.622031	0.976	0.623	4.67061e-19	GluNeu	Bin1cKO_PBSvsControl_PBS
1229	Pde1a	2.29727e-23	0.827823	0.769	0.427	5.84563e-19	GluNeu	Bin1cKO_PBSvsControl_PBS
1230	Mir100hg	2.35647e-23	0.854754	0.764	0.461	5.99628e-19	GluNeu	Bin1cKO_PBSvsControl_PBS
1231	Galnt13	4.28945e-23	-1.50519	0.764	0.849	1.09149e-18	GluNeu	Bin1cKO_PBSvsControl_PBS
1232	Lrfn2	4.61172e-23	1.13666	0.613	0.33	1.1735e-18	GluNeu	Bin1cKO_PBSvsControl_PBS
1233	Snhg11	4.71503e-23	0.537256	0.989	0.798	1.19979e-18	GluNeu	Bin1cKO_PBSvsControl_PBS
1234	Pcdh7	6.66476e-23	0.687847	0.878	0.542	1.69592e-18	GluNeu	Bin1cKO_PBSvsControl_PBS
1235	Bcl11a	7.51837e-23	0.876566	0.74	0.426	1.91313e-18	GluNeu	Bin1cKO_PBSvsControl_PBS
1236	Homer1	9.078e-23	0.931006	0.793	0.535	2.30999e-18	GluNeu	Bin1cKO_PBSvsControl_PBS
1237	Mgat4c	1.02841e-22	0.838111	0.676	0.355	2.61689e-18	GluNeu	Bin1cKO_PBSvsControl_PBS
1238	Ankrd33b	1.09446e-22	0.960279	0.653	0.346	2.78496e-18	GluNeu	Bin1cKO_PBSvsControl_PBS
1239	Fhod3	1.13097e-22	1.03618	0.64	0.343	2.87787e-18	GluNeu	Bin1cKO_PBSvsControl_PBS
1240	Asap1	1.20859e-22	0.750158	0.822	0.498	3.07539e-18	GluNeu	Bin1cKO_PBSvsControl_PBS
1241	Hecw1	1.27418e-22	0.654766	0.936	0.654	3.24228e-18	GluNeu	Bin1cKO_PBSvsControl_PBS
1242	Kcnh7	1.49608e-22	0.619862	0.976	0.591	3.80693e-18	GluNeu	Bin1cKO_PBSvsControl_PBS
1243	Csmd1	1.5602e-22	0.635353	0.987	0.722	3.97008e-18	GluNeu	Bin1cKO_PBSvsControl_PBS
1244	Tjp1	1.90425e-22	0.665543	0.851	0.523	4.84556e-18	GluNeu	Bin1cKO_PBSvsControl_PBS
1245	Kcnb1	1.97114e-22	0.888639	0.689	0.381	5.01576e-18	GluNeu	Bin1cKO_PBSvsControl_PBS
1246	Cdh12	2.20574e-22	0.768026	0.807	0.474	5.61272e-18	GluNeu	Bin1cKO_PBSvsControl_PBS
1247	Ppm1e	3.97321e-22	0.73849	0.851	0.545	1.01102e-17	GluNeu	Bin1cKO_PBSvsControl_PBS
1248	Grm7	4.56478e-22	0.58172	0.958	0.588	1.16155e-17	GluNeu	Bin1cKO_PBSvsControl_PBS
1249	Fut8	4.81072e-22	-1.59465	0.311	0.557	1.22414e-17	GluNeu	Bin1cKO_PBSvsControl_PBS
1250	Neto1	4.86033e-22	0.960951	0.638	0.327	1.23676e-17	GluNeu	Bin1cKO_PBSvsControl_PBS
1251	Gm15738	5.91369e-22	0.710032	0.867	0.569	1.5048e-17	GluNeu	Bin1cKO_PBSvsControl_PBS
1252	Erc2	6.63212e-22	0.570252	0.982	0.687	1.68761e-17	GluNeu	Bin1cKO_PBSvsControl_PBS
1253	Cap2	8.5297e-22	0.734049	0.802	0.498	2.17047e-17	GluNeu	Bin1cKO_PBSvsControl_PBS
1254	Ociad2	9.99733e-22	1.40521	0.413	0.154	2.54392e-17	GluNeu	Bin1cKO_PBSvsControl_PBS
1255	Gm42303	1.09406e-21	0.834089	0.764	0.443	2.78394e-17	GluNeu	Bin1cKO_PBSvsControl_PBS
1256	Dok6	1.13589e-21	0.659335	0.853	0.514	2.89037e-17	GluNeu	Bin1cKO_PBSvsControl_PBS
1257	Celf2	1.20575e-21	0.589005	0.993	0.926	3.06815e-17	GluNeu	Bin1cKO_PBSvsControl_PBS
1258	Grid1	1.24354e-21	0.780771	0.749	0.427	3.16432e-17	GluNeu	Bin1cKO_PBSvsControl_PBS
1259	Lrrtm4	1.56804e-21	0.755294	0.827	0.506	3.99004e-17	GluNeu	Bin1cKO_PBSvsControl_PBS
1260	Efna5	1.97806e-21	0.821318	0.72	0.4	5.03338e-17	GluNeu	Bin1cKO_PBSvsControl_PBS
1261	Asic2	2.04176e-21	0.597583	0.938	0.617	5.19547e-17	GluNeu	Bin1cKO_PBSvsControl_PBS
1262	Atp2b1	2.05276e-21	0.583761	0.951	0.81	5.22345e-17	GluNeu	Bin1cKO_PBSvsControl_PBS
1263	Shank2	2.17971e-21	0.815233	0.718	0.412	5.54648e-17	GluNeu	Bin1cKO_PBSvsControl_PBS
1264	Fnbp1	2.32559e-21	-2.13906	0.204	0.444	5.91769e-17	GluNeu	Bin1cKO_PBSvsControl_PBS
1265	Usp3	2.58765e-21	-2.31445	0.164	0.404	6.58452e-17	GluNeu	Bin1cKO_PBSvsControl_PBS
1266	A230006K03Rik	2.79431e-21	0.901957	0.704	0.418	7.11041e-17	GluNeu	Bin1cKO_PBSvsControl_PBS
1267	Miat	3.01127e-21	0.802501	0.72	0.412	7.66247e-17	GluNeu	Bin1cKO_PBSvsControl_PBS
1268	Gpm6b	3.65422e-21	0.738688	0.802	0.508	9.29854e-17	GluNeu	Bin1cKO_PBSvsControl_PBS
1269	Nin	3.65514e-21	0.973912	0.609	0.321	9.30087e-17	GluNeu	Bin1cKO_PBSvsControl_PBS
1270	Zbtb16	3.8056e-21	1.58776	0.358	0.117	9.68372e-17	GluNeu	Bin1cKO_PBSvsControl_PBS
1271	Mast4	4.76998e-21	0.718038	0.82	0.514	1.21377e-16	GluNeu	Bin1cKO_PBSvsControl_PBS
1272	Fam189a1	4.96624e-21	0.793135	0.758	0.444	1.26371e-16	GluNeu	Bin1cKO_PBSvsControl_PBS
1273	Rif1	5.98545e-21	-2.73076	0.06	0.282	1.52306e-16	GluNeu	Bin1cKO_PBSvsControl_PBS
1274	Kcnma1	6.59253e-21	0.594456	0.976	0.594	1.67754e-16	GluNeu	Bin1cKO_PBSvsControl_PBS
1275	Olfm3	7.36672e-21	-2.22099	0.364	0.543	1.87454e-16	GluNeu	Bin1cKO_PBSvsControl_PBS
1276	Slc35f1	7.36674e-21	0.858011	0.682	0.369	1.87454e-16	GluNeu	Bin1cKO_PBSvsControl_PBS
1277	Pkib	1.03916e-20	-2.6598	0.056	0.276	2.64424e-16	GluNeu	Bin1cKO_PBSvsControl_PBS
1278	Slc8a1	1.18187e-20	0.613726	0.947	0.744	3.00737e-16	GluNeu	Bin1cKO_PBSvsControl_PBS
1279	Grm4	1.3478e-20	-2.92429	0.051	0.265	3.42961e-16	GluNeu	Bin1cKO_PBSvsControl_PBS
1280	Megf11	1.47072e-20	-2.15004	0.16	0.403	3.74239e-16	GluNeu	Bin1cKO_PBSvsControl_PBS
1281	Svep1	1.54941e-20	-3.61898	0.02	0.215	3.94263e-16	GluNeu	Bin1cKO_PBSvsControl_PBS
1282	Sox5	1.90506e-20	0.880269	0.689	0.394	4.84762e-16	GluNeu	Bin1cKO_PBSvsControl_PBS
1283	Lrrc7	1.93935e-20	0.638019	0.978	0.59	4.93486e-16	GluNeu	Bin1cKO_PBSvsControl_PBS
1284	Pak3	2.00735e-20	0.843904	0.678	0.378	5.10791e-16	GluNeu	Bin1cKO_PBSvsControl_PBS
1285	Rasal2	2.04361e-20	0.67903	0.891	0.616	5.20016e-16	GluNeu	Bin1cKO_PBSvsControl_PBS
1286	Mical2	2.32073e-20	0.632984	0.878	0.651	5.90532e-16	GluNeu	Bin1cKO_PBSvsControl_PBS
1287	Slc24a2	2.99797e-20	0.670878	0.829	0.525	7.62863e-16	GluNeu	Bin1cKO_PBSvsControl_PBS
1288	9130019P16Rik	3.31911e-20	-3.89761	0.022	0.215	8.4458e-16	GluNeu	Bin1cKO_PBSvsControl_PBS
1289	Satb2	5.30062e-20	0.895082	0.653	0.377	1.3488e-15	GluNeu	Bin1cKO_PBSvsControl_PBS
1290	5730522E02Rik	6.10786e-20	0.640499	0.853	0.528	1.5542e-15	GluNeu	Bin1cKO_PBSvsControl_PBS
1291	Kctd8	6.42122e-20	-2.11779	0.156	0.389	1.63394e-15	GluNeu	Bin1cKO_PBSvsControl_PBS
1292	Pcca	6.7919e-20	-1.68565	0.313	0.534	1.72827e-15	GluNeu	Bin1cKO_PBSvsControl_PBS
1293	Myt1l	7.68772e-20	0.537238	0.964	0.789	1.95622e-15	GluNeu	Bin1cKO_PBSvsControl_PBS
1294	Lhfp	7.95928e-20	-1.63631	0.398	0.594	2.02532e-15	GluNeu	Bin1cKO_PBSvsControl_PBS
1295	Opcml	8.53084e-20	0.497908	0.989	0.914	2.17076e-15	GluNeu	Bin1cKO_PBSvsControl_PBS
1296	Dapk1	8.67218e-20	0.904207	0.624	0.344	2.20672e-15	GluNeu	Bin1cKO_PBSvsControl_PBS
1297	Cnksr3	8.92951e-20	-3.16376	0.031	0.228	2.2722e-15	GluNeu	Bin1cKO_PBSvsControl_PBS
1298	Chrm3	9.00558e-20	0.62554	0.798	0.465	2.29156e-15	GluNeu	Bin1cKO_PBSvsControl_PBS
1299	Tmem132b	1.12111e-19	0.675598	0.798	0.483	2.85278e-15	GluNeu	Bin1cKO_PBSvsControl_PBS
1300	Kcnt2	1.22558e-19	0.630323	0.836	0.505	3.11862e-15	GluNeu	Bin1cKO_PBSvsControl_PBS
1301	Cadps	1.67737e-19	0.451766	0.984	0.844	4.26824e-15	GluNeu	Bin1cKO_PBSvsControl_PBS
1302	Ppp2r2b	1.78777e-19	0.571306	0.956	0.644	4.54917e-15	GluNeu	Bin1cKO_PBSvsControl_PBS
1303	Npas2	2.14163e-19	1.07777	0.524	0.256	5.4496e-15	GluNeu	Bin1cKO_PBSvsControl_PBS
1304	Patj	2.19081e-19	-2.21953	0.142	0.37	5.57474e-15	GluNeu	Bin1cKO_PBSvsControl_PBS
1305	Arhgap32	2.5088e-19	0.859423	0.667	0.395	6.3839e-15	GluNeu	Bin1cKO_PBSvsControl_PBS
1306	Rian	2.63784e-19	0.507643	0.964	0.784	6.71224e-15	GluNeu	Bin1cKO_PBSvsControl_PBS
1307	Nrg1	2.83852e-19	0.545457	0.967	0.586	7.2229e-15	GluNeu	Bin1cKO_PBSvsControl_PBS
1308	Large1	3.12738e-19	0.533213	0.976	0.752	7.95793e-15	GluNeu	Bin1cKO_PBSvsControl_PBS
1309	Gse1	3.68739e-19	1.25725	0.438	0.194	9.38294e-15	GluNeu	Bin1cKO_PBSvsControl_PBS
1310	Adgrb1	6.88826e-19	0.832172	0.653	0.378	1.75279e-14	GluNeu	Bin1cKO_PBSvsControl_PBS
1311	Pde4a	7.03392e-19	1.04454	0.542	0.279	1.78985e-14	GluNeu	Bin1cKO_PBSvsControl_PBS
1312	Frmd4a	7.18197e-19	0.571583	0.949	0.597	1.82752e-14	GluNeu	Bin1cKO_PBSvsControl_PBS
1313	Gm48747	8.2013e-19	0.938564	0.587	0.323	2.0869e-14	GluNeu	Bin1cKO_PBSvsControl_PBS
1314	Ptk2b	8.49453e-19	0.96135	0.562	0.296	2.16152e-14	GluNeu	Bin1cKO_PBSvsControl_PBS
1315	Scn2a	9.36669e-19	-0.813137	0.862	0.926	2.38345e-14	GluNeu	Bin1cKO_PBSvsControl_PBS
1316	Gm27016	9.47682e-19	-3.82645	0.013	0.187	2.41147e-14	GluNeu	Bin1cKO_PBSvsControl_PBS
1317	Nos1ap	9.8346e-19	0.841465	0.651	0.378	2.50251e-14	GluNeu	Bin1cKO_PBSvsControl_PBS
1318	2210408I21Rik	1.15274e-18	0.836115	0.649	0.386	2.93325e-14	GluNeu	Bin1cKO_PBSvsControl_PBS
1319	Fstl4	1.3136e-18	0.747493	0.736	0.444	3.34259e-14	GluNeu	Bin1cKO_PBSvsControl_PBS
1320	Tll1	1.51735e-18	-2.33605	0.058	0.264	3.86105e-14	GluNeu	Bin1cKO_PBSvsControl_PBS
1321	Brinp2	1.53918e-18	0.851503	0.687	0.446	3.91661e-14	GluNeu	Bin1cKO_PBSvsControl_PBS
1322	Caln1	1.69703e-18	-1.26626	0.618	0.753	4.31827e-14	GluNeu	Bin1cKO_PBSvsControl_PBS
1323	Nrg3	1.93515e-18	0.528377	0.982	0.85	4.92419e-14	GluNeu	Bin1cKO_PBSvsControl_PBS
1324	Thrb	1.9394e-18	0.814101	0.711	0.429	4.93501e-14	GluNeu	Bin1cKO_PBSvsControl_PBS
1325	Sorbs2	2.60725e-18	0.552161	0.947	0.639	6.6344e-14	GluNeu	Bin1cKO_PBSvsControl_PBS
1326	Rgs6	3.0579e-18	0.678072	0.787	0.475	7.78112e-14	GluNeu	Bin1cKO_PBSvsControl_PBS
1327	Grm8	3.94132e-18	0.667075	0.691	0.384	1.00291e-13	GluNeu	Bin1cKO_PBSvsControl_PBS
1328	Camk4	3.94954e-18	-1.12053	0.776	0.819	1.005e-13	GluNeu	Bin1cKO_PBSvsControl_PBS
1329	Kcnk10	4.01472e-18	-2.05247	0.142	0.363	1.02158e-13	GluNeu	Bin1cKO_PBSvsControl_PBS
1330	Gria4	4.66074e-18	-0.750603	0.933	0.955	1.18597e-13	GluNeu	Bin1cKO_PBSvsControl_PBS
1331	Camk2d	4.72247e-18	-1.36225	0.318	0.543	1.20168e-13	GluNeu	Bin1cKO_PBSvsControl_PBS
1332	Plcb4	5.17367e-18	-1.56102	0.353	0.546	1.31649e-13	GluNeu	Bin1cKO_PBSvsControl_PBS
1333	Lingo2	5.24432e-18	0.682397	0.796	0.485	1.33447e-13	GluNeu	Bin1cKO_PBSvsControl_PBS
1334	R3hdm1	6.63004e-18	0.473623	0.982	0.807	1.68708e-13	GluNeu	Bin1cKO_PBSvsControl_PBS
1335	Cmip	7.38972e-18	0.82231	0.624	0.363	1.88039e-13	GluNeu	Bin1cKO_PBSvsControl_PBS
1336	Gm15563	7.45817e-18	-2.03617	0.124	0.344	1.89781e-13	GluNeu	Bin1cKO_PBSvsControl_PBS
1337	Ntn4	7.50148e-18	-3.22882	0.024	0.201	1.90883e-13	GluNeu	Bin1cKO_PBSvsControl_PBS
1338	Syt9	8.33861e-18	-3.05889	0.036	0.219	2.12184e-13	GluNeu	Bin1cKO_PBSvsControl_PBS
1339	Khdrbs2	9.00934e-18	0.626333	0.787	0.494	2.29252e-13	GluNeu	Bin1cKO_PBSvsControl_PBS
1340	Ccdc88a	1.00434e-17	0.709135	0.698	0.415	2.55563e-13	GluNeu	Bin1cKO_PBSvsControl_PBS
1341	Appl2	1.12582e-17	-2.76415	0.031	0.213	2.86476e-13	GluNeu	Bin1cKO_PBSvsControl_PBS
1342	Fat3	1.2681e-17	0.610514	0.764	0.446	3.22681e-13	GluNeu	Bin1cKO_PBSvsControl_PBS
1343	Lrp1b	1.3034e-17	0.580791	0.936	0.736	3.31664e-13	GluNeu	Bin1cKO_PBSvsControl_PBS
1344	Ralyl	1.37916e-17	-0.65116	0.993	0.991	3.50941e-13	GluNeu	Bin1cKO_PBSvsControl_PBS
1345	Negr1	1.53845e-17	-0.536386	1	0.995	3.91474e-13	GluNeu	Bin1cKO_PBSvsControl_PBS
1346	Pam	1.80756e-17	0.924743	0.609	0.353	4.59951e-13	GluNeu	Bin1cKO_PBSvsControl_PBS
1347	Gria2	2.00729e-17	0.35833	0.996	0.946	5.10774e-13	GluNeu	Bin1cKO_PBSvsControl_PBS
1348	Gm42418	2.05055e-17	0.477616	0.956	0.836	5.21784e-13	GluNeu	Bin1cKO_PBSvsControl_PBS
1349	Acap2	2.38406e-17	0.750192	0.704	0.449	6.06649e-13	GluNeu	Bin1cKO_PBSvsControl_PBS
1350	Lrrfip1	2.51996e-17	0.79782	0.631	0.364	6.4123e-13	GluNeu	Bin1cKO_PBSvsControl_PBS
1351	Sorbs2os	2.69349e-17	0.525055	0.909	0.603	6.85387e-13	GluNeu	Bin1cKO_PBSvsControl_PBS
1352	Trhde	2.80917e-17	-1.13323	0.558	0.716	7.14821e-13	GluNeu	Bin1cKO_PBSvsControl_PBS
1353	Soga1	3.43173e-17	-3.53806	0.016	0.179	8.73239e-13	GluNeu	Bin1cKO_PBSvsControl_PBS
1354	Nxn	3.98338e-17	-4.06556	0.013	0.173	1.01361e-12	GluNeu	Bin1cKO_PBSvsControl_PBS
1355	Als2	5.0976e-17	-2.09703	0.098	0.302	1.29713e-12	GluNeu	Bin1cKO_PBSvsControl_PBS
1356	Dock9	5.67062e-17	-1.53597	0.309	0.512	1.44295e-12	GluNeu	Bin1cKO_PBSvsControl_PBS
1357	Cdh10	6.36586e-17	0.729922	0.678	0.404	1.61986e-12	GluNeu	Bin1cKO_PBSvsControl_PBS
1358	Camkv	6.4089e-17	1.0115	0.529	0.287	1.63081e-12	GluNeu	Bin1cKO_PBSvsControl_PBS
1359	Gabrg3	6.88637e-17	0.699134	0.693	0.398	1.75231e-12	GluNeu	Bin1cKO_PBSvsControl_PBS
1360	Kat2b	6.98806e-17	-2.95074	0.013	0.173	1.77818e-12	GluNeu	Bin1cKO_PBSvsControl_PBS
1361	Cacna1a	7.35513e-17	-0.567907	0.989	0.981	1.87159e-12	GluNeu	Bin1cKO_PBSvsControl_PBS
1362	Meis2	7.75841e-17	1.21412	0.433	0.208	1.9742e-12	GluNeu	Bin1cKO_PBSvsControl_PBS
1363	Rimbp2	8.60582e-17	0.737103	0.664	0.4	2.18984e-12	GluNeu	Bin1cKO_PBSvsControl_PBS
1364	Trerf1	9.10621e-17	0.740316	0.696	0.435	2.31717e-12	GluNeu	Bin1cKO_PBSvsControl_PBS
1365	Hivep2	1.03303e-16	0.3696	0.987	0.931	2.62865e-12	GluNeu	Bin1cKO_PBSvsControl_PBS
1366	Ldb2	1.17923e-16	0.874279	0.507	0.252	3.00068e-12	GluNeu	Bin1cKO_PBSvsControl_PBS
1367	AC149090.1	1.27058e-16	-0.769154	0.704	0.821	3.23312e-12	GluNeu	Bin1cKO_PBSvsControl_PBS
1368	Tmem132d	1.38561e-16	0.595005	0.809	0.492	3.52583e-12	GluNeu	Bin1cKO_PBSvsControl_PBS
1369	Ak5	1.4026e-16	0.762937	0.691	0.44	3.56907e-12	GluNeu	Bin1cKO_PBSvsControl_PBS
1370	Cntn6	1.42281e-16	-1.36597	0.4	0.583	3.62048e-12	GluNeu	Bin1cKO_PBSvsControl_PBS
1371	Pde4b	1.59896e-16	-0.846855	0.818	0.887	4.06871e-12	GluNeu	Bin1cKO_PBSvsControl_PBS
1372	Fgfr1	1.74942e-16	-3.49023	0.02	0.181	4.45157e-12	GluNeu	Bin1cKO_PBSvsControl_PBS
1373	Shc3	1.82994e-16	1.2185	0.387	0.165	4.65648e-12	GluNeu	Bin1cKO_PBSvsControl_PBS
1374	Epb41	1.83329e-16	-1.28774	0.313	0.532	4.665e-12	GluNeu	Bin1cKO_PBSvsControl_PBS
1375	Cacng3	2.14094e-16	0.823455	0.593	0.335	5.44784e-12	GluNeu	Bin1cKO_PBSvsControl_PBS
1376	Eps8	2.42858e-16	-4.6736	0.004	0.148	6.17977e-12	GluNeu	Bin1cKO_PBSvsControl_PBS
1377	Epha10	2.46316e-16	1.22968	0.427	0.199	6.26776e-12	GluNeu	Bin1cKO_PBSvsControl_PBS
1378	Sphkap	2.51448e-16	-1.17728	0.638	0.742	6.39835e-12	GluNeu	Bin1cKO_PBSvsControl_PBS
1379	Galnt7	2.53717e-16	-2.24499	0.091	0.287	6.45609e-12	GluNeu	Bin1cKO_PBSvsControl_PBS
1380	2210408F21Rik	2.55628e-16	0.922674	0.573	0.335	6.5047e-12	GluNeu	Bin1cKO_PBSvsControl_PBS
1381	Egr1	2.56651e-16	2.46467	0.178	0.032	6.53075e-12	GluNeu	Bin1cKO_PBSvsControl_PBS
1382	Gm20642	3.435e-16	0.498565	0.958	0.619	8.74071e-12	GluNeu	Bin1cKO_PBSvsControl_PBS
1383	Cacnb2	3.47922e-16	0.771276	0.656	0.398	8.85322e-12	GluNeu	Bin1cKO_PBSvsControl_PBS
1384	Cdk14	3.84006e-16	0.683425	0.731	0.469	9.7714e-12	GluNeu	Bin1cKO_PBSvsControl_PBS
1385	Pik3r3	3.90448e-16	-1.72861	0.184	0.397	9.93533e-12	GluNeu	Bin1cKO_PBSvsControl_PBS
1386	Prkg1	4.15495e-16	0.477693	0.844	0.539	1.05727e-11	GluNeu	Bin1cKO_PBSvsControl_PBS
1387	Ptprn	4.538e-16	0.673466	0.762	0.534	1.15474e-11	GluNeu	Bin1cKO_PBSvsControl_PBS
1388	Kcnc1	4.86397e-16	-1.83549	0.16	0.366	1.23769e-11	GluNeu	Bin1cKO_PBSvsControl_PBS
1389	Ndrg4	5.74565e-16	0.790832	0.596	0.343	1.46204e-11	GluNeu	Bin1cKO_PBSvsControl_PBS
1390	Csrnp3	7.42462e-16	0.762769	0.678	0.451	1.88927e-11	GluNeu	Bin1cKO_PBSvsControl_PBS
1391	Cntn5	7.93421e-16	0.60812	0.727	0.441	2.01894e-11	GluNeu	Bin1cKO_PBSvsControl_PBS
1392	Mmp24	7.95588e-16	-2.08216	0.082	0.273	2.02445e-11	GluNeu	Bin1cKO_PBSvsControl_PBS
1393	Trank1	8.50833e-16	0.632458	0.718	0.444	2.16503e-11	GluNeu	Bin1cKO_PBSvsControl_PBS
1394	Plcxd3	8.64448e-16	-1.3307	0.249	0.471	2.19968e-11	GluNeu	Bin1cKO_PBSvsControl_PBS
1395	Mast3	8.98706e-16	1.15359	0.433	0.213	2.28685e-11	GluNeu	Bin1cKO_PBSvsControl_PBS
1396	Shisa9	1.20023e-15	0.764038	0.549	0.302	3.05409e-11	GluNeu	Bin1cKO_PBSvsControl_PBS
1397	Adgrl2	1.26697e-15	0.949568	0.536	0.296	3.22393e-11	GluNeu	Bin1cKO_PBSvsControl_PBS
1398	Runx2	1.33001e-15	0.932978	0.538	0.302	3.38435e-11	GluNeu	Bin1cKO_PBSvsControl_PBS
1399	Kctd16	1.33029e-15	0.496018	0.882	0.529	3.38507e-11	GluNeu	Bin1cKO_PBSvsControl_PBS
1400	Nrgn	1.77977e-15	1.02274	0.498	0.269	4.52881e-11	GluNeu	Bin1cKO_PBSvsControl_PBS
1401	Gm40841	2.01708e-15	0.864095	0.587	0.347	5.13266e-11	GluNeu	Bin1cKO_PBSvsControl_PBS
1402	Atp2b3	2.79365e-15	-1.5931	0.18	0.387	7.10873e-11	GluNeu	Bin1cKO_PBSvsControl_PBS
1403	Lrrtm3	2.87308e-15	-1.08059	0.716	0.782	7.31083e-11	GluNeu	Bin1cKO_PBSvsControl_PBS
1404	Pclo	2.90105e-15	-0.664404	0.929	0.941	7.38201e-11	GluNeu	Bin1cKO_PBSvsControl_PBS
1405	Mrtfb	3.29155e-15	0.572445	0.82	0.569	8.37567e-11	GluNeu	Bin1cKO_PBSvsControl_PBS
1406	Fnbp1l	3.88455e-15	0.856714	0.547	0.304	9.88462e-11	GluNeu	Bin1cKO_PBSvsControl_PBS
1407	Rps6ka1	4.11708e-15	-4.06888	0.011	0.151	1.04763e-10	GluNeu	Bin1cKO_PBSvsControl_PBS
1408	Schip1	4.5998e-15	0.661798	0.86	0.708	1.17047e-10	GluNeu	Bin1cKO_PBSvsControl_PBS
1409	Kif26b	4.90422e-15	-1.89568	0.093	0.282	1.24793e-10	GluNeu	Bin1cKO_PBSvsControl_PBS
1410	Zfpm2	5.425e-15	-0.962406	0.349	0.573	1.38045e-10	GluNeu	Bin1cKO_PBSvsControl_PBS
1411	Lin7a	5.86741e-15	-1.24181	0.593	0.701	1.49302e-10	GluNeu	Bin1cKO_PBSvsControl_PBS
1412	Ddx5	7.70127e-15	-1.08039	0.549	0.687	1.95967e-10	GluNeu	Bin1cKO_PBSvsControl_PBS
1413	Prkcg	8.19083e-15	0.937747	0.469	0.241	2.08424e-10	GluNeu	Bin1cKO_PBSvsControl_PBS
1414	Epha4	9.15561e-15	0.849882	0.56	0.326	2.32974e-10	GluNeu	Bin1cKO_PBSvsControl_PBS
1415	March1	9.82515e-15	0.48417	0.818	0.514	2.50011e-10	GluNeu	Bin1cKO_PBSvsControl_PBS
1416	Ajap1	1.27642e-14	1.41619	0.293	0.11	3.24798e-10	GluNeu	Bin1cKO_PBSvsControl_PBS
1417	Tmtc4	1.29493e-14	-2.19976	0.073	0.248	3.29509e-10	GluNeu	Bin1cKO_PBSvsControl_PBS
1418	Grm1	1.84371e-14	-1.15437	0.509	0.654	4.69151e-10	GluNeu	Bin1cKO_PBSvsControl_PBS
1419	Plxna4	1.96836e-14	0.528339	0.776	0.514	5.00869e-10	GluNeu	Bin1cKO_PBSvsControl_PBS
1420	Igf2r	2.21255e-14	-2.52356	0.051	0.215	5.63006e-10	GluNeu	Bin1cKO_PBSvsControl_PBS
1421	Xylt1	2.25072e-14	0.890122	0.571	0.341	5.72718e-10	GluNeu	Bin1cKO_PBSvsControl_PBS
1422	Cdh7	2.51414e-14	-1.72275	0.142	0.336	6.39749e-10	GluNeu	Bin1cKO_PBSvsControl_PBS
1423	Tmtc2	2.57764e-14	-1.39194	0.249	0.452	6.55906e-10	GluNeu	Bin1cKO_PBSvsControl_PBS
1424	Car10	2.66544e-14	-0.533475	0.891	0.938	6.78248e-10	GluNeu	Bin1cKO_PBSvsControl_PBS
1425	Mctp1	2.72008e-14	-0.895228	0.771	0.849	6.92152e-10	GluNeu	Bin1cKO_PBSvsControl_PBS
1426	2010300C02Rik	2.89931e-14	0.793841	0.582	0.352	7.37759e-10	GluNeu	Bin1cKO_PBSvsControl_PBS
1427	Sema6d	3.4224e-14	0.932561	0.547	0.335	8.70865e-10	GluNeu	Bin1cKO_PBSvsControl_PBS
1428	Slc15a2	3.91004e-14	-3.14231	0.022	0.165	9.94948e-10	GluNeu	Bin1cKO_PBSvsControl_PBS
1429	Tspan9	4.17749e-14	-2.68182	0.047	0.205	1.063e-09	GluNeu	Bin1cKO_PBSvsControl_PBS
1430	Gm26871	4.32205e-14	0.478253	0.804	0.529	1.09979e-09	GluNeu	Bin1cKO_PBSvsControl_PBS
1431	Gm12002	4.4466e-14	1.18584	0.356	0.156	1.13148e-09	GluNeu	Bin1cKO_PBSvsControl_PBS
1432	Ctnna3	4.7424e-14	-0.686225	0.853	0.904	1.20675e-09	GluNeu	Bin1cKO_PBSvsControl_PBS
1433	Prune2	5.96486e-14	-2.05889	0.082	0.256	1.51782e-09	GluNeu	Bin1cKO_PBSvsControl_PBS
1434	Gm31615	9.58636e-14	-3.48392	0.018	0.153	2.43935e-09	GluNeu	Bin1cKO_PBSvsControl_PBS
1435	4930419G24Rik	9.76826e-14	0.694751	0.582	0.335	2.48563e-09	GluNeu	Bin1cKO_PBSvsControl_PBS
1436	Nrep	9.81826e-14	-2.80485	0.031	0.177	2.49835e-09	GluNeu	Bin1cKO_PBSvsControl_PBS
1437	B3galt1	1.01245e-13	0.454096	0.909	0.688	2.57628e-09	GluNeu	Bin1cKO_PBSvsControl_PBS
1438	Pdzrn3	1.11759e-13	0.725434	0.607	0.347	2.84381e-09	GluNeu	Bin1cKO_PBSvsControl_PBS
1439	Adamts10	1.17421e-13	-2.60104	0.04	0.191	2.9879e-09	GluNeu	Bin1cKO_PBSvsControl_PBS
1440	5330417C22Rik	1.29265e-13	0.830923	0.529	0.309	3.28927e-09	GluNeu	Bin1cKO_PBSvsControl_PBS
1441	Slc1a2	1.50972e-13	0.685085	0.62	0.372	3.84162e-09	GluNeu	Bin1cKO_PBSvsControl_PBS
1442	Grip1	1.5797e-13	0.841316	0.513	0.287	4.01971e-09	GluNeu	Bin1cKO_PBSvsControl_PBS
1443	Rnf152	1.86071e-13	-2.42146	0.058	0.216	4.73475e-09	GluNeu	Bin1cKO_PBSvsControl_PBS
1444	Dlgap4	1.87127e-13	0.762577	0.551	0.327	4.76164e-09	GluNeu	Bin1cKO_PBSvsControl_PBS
1445	Plppr4	2.00351e-13	0.692381	0.616	0.38	5.09814e-09	GluNeu	Bin1cKO_PBSvsControl_PBS
1446	Cttnbp2	2.20447e-13	0.483876	0.88	0.568	5.6095e-09	GluNeu	Bin1cKO_PBSvsControl_PBS
1447	Wwc1	2.42086e-13	1.3153	0.322	0.14	6.16013e-09	GluNeu	Bin1cKO_PBSvsControl_PBS
1448	Ablim1	2.47245e-13	-0.858075	0.796	0.84	6.2914e-09	GluNeu	Bin1cKO_PBSvsControl_PBS
1449	Sorcs3	2.64602e-13	0.831053	0.533	0.307	6.73307e-09	GluNeu	Bin1cKO_PBSvsControl_PBS
1450	A830018L16Rik	3.4264e-13	0.61761	0.702	0.451	8.71883e-09	GluNeu	Bin1cKO_PBSvsControl_PBS
1451	Flrt2	3.63392e-13	0.704484	0.629	0.404	9.24686e-09	GluNeu	Bin1cKO_PBSvsControl_PBS
1452	Tcf4	3.85044e-13	-0.545708	0.918	0.935	9.79784e-09	GluNeu	Bin1cKO_PBSvsControl_PBS
1453	Gphn	3.97503e-13	-0.605822	0.876	0.924	1.01149e-08	GluNeu	Bin1cKO_PBSvsControl_PBS
1454	Btg1	4.31295e-13	-2.9885	0.027	0.164	1.09747e-08	GluNeu	Bin1cKO_PBSvsControl_PBS
1455	Atp1b1	4.6609e-13	0.626471	0.722	0.522	1.18601e-08	GluNeu	Bin1cKO_PBSvsControl_PBS
1456	Pdzrn4	5.02413e-13	0.676647	0.596	0.361	1.27844e-08	GluNeu	Bin1cKO_PBSvsControl_PBS
1457	Lingo1	6.38658e-13	0.694918	0.596	0.378	1.62513e-08	GluNeu	Bin1cKO_PBSvsControl_PBS
1458	Bcl2l15	6.4342e-13	-3.62774	0.009	0.128	1.63725e-08	GluNeu	Bin1cKO_PBSvsControl_PBS
1459	Wscd2	6.79281e-13	-1.41157	0.258	0.437	1.7285e-08	GluNeu	Bin1cKO_PBSvsControl_PBS
1460	Snrk	7.04375e-13	-2.00375	0.073	0.235	1.79235e-08	GluNeu	Bin1cKO_PBSvsControl_PBS
1461	Astn1	7.53918e-13	0.535719	0.729	0.494	1.91842e-08	GluNeu	Bin1cKO_PBSvsControl_PBS
1462	Dgkh	7.98596e-13	0.573375	0.649	0.409	2.03211e-08	GluNeu	Bin1cKO_PBSvsControl_PBS
1463	Csmd3	8.25012e-13	0.380463	0.931	0.778	2.09932e-08	GluNeu	Bin1cKO_PBSvsControl_PBS
1464	Zfp385b	8.51129e-13	-0.890177	0.731	0.804	2.16578e-08	GluNeu	Bin1cKO_PBSvsControl_PBS
1465	A330076H08Rik	8.5288e-13	-1.03968	0.453	0.602	2.17024e-08	GluNeu	Bin1cKO_PBSvsControl_PBS
1466	Dgkb	1.17683e-12	0.563683	0.616	0.36	2.99457e-08	GluNeu	Bin1cKO_PBSvsControl_PBS
1467	Peli2	1.47954e-12	-3.05889	0.024	0.154	3.76483e-08	GluNeu	Bin1cKO_PBSvsControl_PBS
1468	Rims1	1.58546e-12	-0.388852	1	0.991	4.03437e-08	GluNeu	Bin1cKO_PBSvsControl_PBS
1469	Fgd4	1.64358e-12	-1.41919	0.196	0.377	4.18224e-08	GluNeu	Bin1cKO_PBSvsControl_PBS
1470	Cacna2d3	1.64974e-12	0.604543	0.693	0.488	4.19794e-08	GluNeu	Bin1cKO_PBSvsControl_PBS
1471	9630028H03Rik	1.93979e-12	0.591852	0.656	0.414	4.93599e-08	GluNeu	Bin1cKO_PBSvsControl_PBS
1472	Ubash3b	1.99797e-12	-1.97257	0.1	0.264	5.08403e-08	GluNeu	Bin1cKO_PBSvsControl_PBS
1473	Kank2	2.24091e-12	-3.42146	0.011	0.128	5.70222e-08	GluNeu	Bin1cKO_PBSvsControl_PBS
1474	Tmem191c	2.56198e-12	0.775625	0.5	0.292	6.51921e-08	GluNeu	Bin1cKO_PBSvsControl_PBS
1475	Ust	2.60596e-12	-1.90392	0.124	0.292	6.63111e-08	GluNeu	Bin1cKO_PBSvsControl_PBS
1476	Vsnl1	2.80209e-12	-0.86751	0.604	0.727	7.13019e-08	GluNeu	Bin1cKO_PBSvsControl_PBS
1477	Rnf150	2.96314e-12	0.616455	0.704	0.506	7.54e-08	GluNeu	Bin1cKO_PBSvsControl_PBS
1478	Dkk3	2.99185e-12	1.19349	0.353	0.174	7.61307e-08	GluNeu	Bin1cKO_PBSvsControl_PBS
1479	Camk1d	3.14648e-12	0.459777	0.84	0.631	8.00654e-08	GluNeu	Bin1cKO_PBSvsControl_PBS
1480	Mpped1	3.17363e-12	0.931325	0.384	0.188	8.07562e-08	GluNeu	Bin1cKO_PBSvsControl_PBS
1481	Loxl2	3.32454e-12	1.67112	0.222	0.077	8.45963e-08	GluNeu	Bin1cKO_PBSvsControl_PBS
1482	Csmd2	3.38341e-12	0.438152	0.862	0.637	8.60943e-08	GluNeu	Bin1cKO_PBSvsControl_PBS
1483	Ube2e2	3.78822e-12	0.378762	0.964	0.79	9.6395e-08	GluNeu	Bin1cKO_PBSvsControl_PBS
1484	Pde1c	3.85114e-12	-1.37502	0.473	0.586	9.79961e-08	GluNeu	Bin1cKO_PBSvsControl_PBS
1485	Fam81a	3.85155e-12	1.1281	0.338	0.159	9.80065e-08	GluNeu	Bin1cKO_PBSvsControl_PBS
1486	Afap1l2	4.0869e-12	-4.41253	0.004	0.111	1.03995e-07	GluNeu	Bin1cKO_PBSvsControl_PBS
1487	Syt2	4.59233e-12	-2.152	0.058	0.205	1.16856e-07	GluNeu	Bin1cKO_PBSvsControl_PBS
1488	Cntn3	4.87386e-12	0.487655	0.682	0.438	1.2402e-07	GluNeu	Bin1cKO_PBSvsControl_PBS
1489	Smg1	4.99274e-12	-1.0608	0.484	0.603	1.27045e-07	GluNeu	Bin1cKO_PBSvsControl_PBS
1490	Kcnh5	5.04305e-12	0.801703	0.451	0.242	1.28326e-07	GluNeu	Bin1cKO_PBSvsControl_PBS
1491	Slc17a7	5.82011e-12	0.487401	0.829	0.647	1.48098e-07	GluNeu	Bin1cKO_PBSvsControl_PBS
1492	Gm42912	6.19018e-12	-4.2109	0.004	0.11	1.57515e-07	GluNeu	Bin1cKO_PBSvsControl_PBS
1493	Fstl5	6.26845e-12	-1.48552	0.169	0.346	1.59507e-07	GluNeu	Bin1cKO_PBSvsControl_PBS
1494	Dock4	6.82777e-12	-0.843067	0.609	0.707	1.7374e-07	GluNeu	Bin1cKO_PBSvsControl_PBS
1495	Iqgap2	7.07544e-12	1.12837	0.376	0.199	1.80042e-07	GluNeu	Bin1cKO_PBSvsControl_PBS
1496	Neb	7.68708e-12	-3.34335	0.027	0.151	1.95605e-07	GluNeu	Bin1cKO_PBSvsControl_PBS
1497	Baiap2	7.90669e-12	0.681446	0.58	0.366	2.01194e-07	GluNeu	Bin1cKO_PBSvsControl_PBS
1498	Synpr	8.5e-12	-2.41381	0.08	0.231	2.16291e-07	GluNeu	Bin1cKO_PBSvsControl_PBS
1499	Rab37	8.59648e-12	-3.35657	0.016	0.131	2.18746e-07	GluNeu	Bin1cKO_PBSvsControl_PBS
1500	Arhgap15	8.8649e-12	0.761622	0.476	0.265	2.25576e-07	GluNeu	Bin1cKO_PBSvsControl_PBS
1501	Hs3st2	9.13889e-12	0.766358	0.436	0.236	2.32548e-07	GluNeu	Bin1cKO_PBSvsControl_PBS
1502	Zeb2	9.35657e-12	0.59368	0.636	0.412	2.38087e-07	GluNeu	Bin1cKO_PBSvsControl_PBS
1503	Plxna2	9.37321e-12	0.646069	0.651	0.446	2.38511e-07	GluNeu	Bin1cKO_PBSvsControl_PBS
1504	Pax6	1.12743e-11	-3.35308	0.011	0.122	2.86886e-07	GluNeu	Bin1cKO_PBSvsControl_PBS
1505	Alms1	1.13592e-11	-1.77974	0.109	0.269	2.89046e-07	GluNeu	Bin1cKO_PBSvsControl_PBS
1506	Lhfpl3	1.22526e-11	0.781654	0.431	0.225	3.11779e-07	GluNeu	Bin1cKO_PBSvsControl_PBS
1507	Nptn	1.2679e-11	0.361609	0.951	0.813	3.2263e-07	GluNeu	Bin1cKO_PBSvsControl_PBS
1508	Foxn2	1.35305e-11	-2.42813	0.04	0.173	3.44298e-07	GluNeu	Bin1cKO_PBSvsControl_PBS
1509	Gm28905	1.40006e-11	0.958384	0.353	0.171	3.5626e-07	GluNeu	Bin1cKO_PBSvsControl_PBS
1510	Kcnb2	1.42151e-11	0.572103	0.744	0.525	3.61718e-07	GluNeu	Bin1cKO_PBSvsControl_PBS
1511	Nlgn1	1.44458e-11	0.291012	1	0.929	3.67588e-07	GluNeu	Bin1cKO_PBSvsControl_PBS
1512	Xkr4	1.47809e-11	0.368588	0.964	0.767	3.76115e-07	GluNeu	Bin1cKO_PBSvsControl_PBS
1513	Rnf182	1.72111e-11	-2.72186	0.033	0.16	4.37953e-07	GluNeu	Bin1cKO_PBSvsControl_PBS
1514	Kctd1	1.85162e-11	0.804718	0.527	0.33	4.71162e-07	GluNeu	Bin1cKO_PBSvsControl_PBS
1515	Ahi1	1.88981e-11	0.352508	0.969	0.802	4.8088e-07	GluNeu	Bin1cKO_PBSvsControl_PBS
1516	Rgs7bp	1.91046e-11	0.431464	0.864	0.667	4.86135e-07	GluNeu	Bin1cKO_PBSvsControl_PBS
1517	Syt16	1.96559e-11	0.507612	0.696	0.471	5.00164e-07	GluNeu	Bin1cKO_PBSvsControl_PBS
1518	Pde7b	1.97316e-11	0.984058	0.442	0.25	5.02091e-07	GluNeu	Bin1cKO_PBSvsControl_PBS
1519	Mapk4	2.55273e-11	0.952334	0.436	0.248	6.49569e-07	GluNeu	Bin1cKO_PBSvsControl_PBS
1520	4930594M22Rik	2.96544e-11	-2.56638	0.036	0.162	7.54586e-07	GluNeu	Bin1cKO_PBSvsControl_PBS
1521	Phactr3	3.0357e-11	-1.19954	0.3	0.465	7.72465e-07	GluNeu	Bin1cKO_PBSvsControl_PBS
1522	Specc1	3.3417e-11	-1.2606	0.493	0.585	8.50329e-07	GluNeu	Bin1cKO_PBSvsControl_PBS
1523	Nol4	3.57037e-11	0.409675	0.86	0.66	9.08517e-07	GluNeu	Bin1cKO_PBSvsControl_PBS
1524	Grik3	3.7451e-11	0.850133	0.404	0.216	9.52979e-07	GluNeu	Bin1cKO_PBSvsControl_PBS
1525	Cntnap4	4.03757e-11	-1.34183	0.211	0.386	1.0274e-06	GluNeu	Bin1cKO_PBSvsControl_PBS
1526	Gm44151	4.06252e-11	0.815575	0.456	0.262	1.03375e-06	GluNeu	Bin1cKO_PBSvsControl_PBS
1527	Ptpn22	5.2165e-11	-3.50956	0.009	0.111	1.32739e-06	GluNeu	Bin1cKO_PBSvsControl_PBS
1528	Ptprn2	6.26386e-11	0.348836	0.944	0.827	1.5939e-06	GluNeu	Bin1cKO_PBSvsControl_PBS
1529	Tafa2	6.57218e-11	0.480791	0.569	0.336	1.67236e-06	GluNeu	Bin1cKO_PBSvsControl_PBS
1530	Adcy9	6.73631e-11	0.626998	0.644	0.461	1.71412e-06	GluNeu	Bin1cKO_PBSvsControl_PBS
1531	Elmod1	6.80212e-11	0.62947	0.596	0.387	1.73087e-06	GluNeu	Bin1cKO_PBSvsControl_PBS
1532	Cntn2	8.8902e-11	-2.20328	0.029	0.148	2.2622e-06	GluNeu	Bin1cKO_PBSvsControl_PBS
1533	Smad3	9.49311e-11	1.11552	0.309	0.147	2.41562e-06	GluNeu	Bin1cKO_PBSvsControl_PBS
1534	Tcf12	1.00665e-10	-1.18207	0.362	0.506	2.56152e-06	GluNeu	Bin1cKO_PBSvsControl_PBS
1535	Aff3	1.00922e-10	0.526069	0.709	0.52	2.56807e-06	GluNeu	Bin1cKO_PBSvsControl_PBS
1536	Htr1f	1.23842e-10	0.717495	0.52	0.323	3.15129e-06	GluNeu	Bin1cKO_PBSvsControl_PBS
1537	Stag1	1.28129e-10	-0.675289	0.753	0.793	3.26036e-06	GluNeu	Bin1cKO_PBSvsControl_PBS
1538	Dgki	1.3051e-10	0.353288	0.922	0.705	3.32095e-06	GluNeu	Bin1cKO_PBSvsControl_PBS
1539	Prkn	1.39663e-10	0.414148	0.853	0.662	3.55385e-06	GluNeu	Bin1cKO_PBSvsControl_PBS
1540	Rit2	1.44456e-10	-1.10391	0.562	0.65	3.67582e-06	GluNeu	Bin1cKO_PBSvsControl_PBS
1541	Atp2b4	1.47128e-10	0.913092	0.382	0.208	3.74383e-06	GluNeu	Bin1cKO_PBSvsControl_PBS
1542	4430402I18Rik	1.71548e-10	0.983276	0.322	0.156	4.3652e-06	GluNeu	Bin1cKO_PBSvsControl_PBS
1543	Epha6	1.81057e-10	0.401128	0.6	0.377	4.60717e-06	GluNeu	Bin1cKO_PBSvsControl_PBS
1544	Unc5d	1.83533e-10	0.383245	0.691	0.438	4.67017e-06	GluNeu	Bin1cKO_PBSvsControl_PBS
1545	Hcn1	1.85367e-10	0.481233	0.82	0.61	4.71684e-06	GluNeu	Bin1cKO_PBSvsControl_PBS
1546	Ebf1	1.92702e-10	-2.58699	0.018	0.125	4.90349e-06	GluNeu	Bin1cKO_PBSvsControl_PBS
1547	Nrg2	2.62112e-10	-0.930212	0.413	0.562	6.6697e-06	GluNeu	Bin1cKO_PBSvsControl_PBS
1548	Otud7a	2.62331e-10	-0.542781	0.933	0.946	6.67528e-06	GluNeu	Bin1cKO_PBSvsControl_PBS
1549	Pcdh15	2.62974e-10	0.461634	0.629	0.401	6.69165e-06	GluNeu	Bin1cKO_PBSvsControl_PBS
1550	Cnr1	2.75689e-10	-1.46511	0.151	0.307	7.01519e-06	GluNeu	Bin1cKO_PBSvsControl_PBS
1551	Pan3	2.90515e-10	-0.996725	0.484	0.596	7.39245e-06	GluNeu	Bin1cKO_PBSvsControl_PBS
1552	Creb5	3.13645e-10	-3.9002	0.011	0.108	7.98101e-06	GluNeu	Bin1cKO_PBSvsControl_PBS
1553	Tafa1	3.38535e-10	0.510984	0.569	0.36	8.61436e-06	GluNeu	Bin1cKO_PBSvsControl_PBS
1554	Gm27008	3.40739e-10	1.22351	0.242	0.1	8.67045e-06	GluNeu	Bin1cKO_PBSvsControl_PBS
1555	Gm30382	3.40809e-10	0.799279	0.444	0.256	8.67223e-06	GluNeu	Bin1cKO_PBSvsControl_PBS
1556	Grin2a	3.42541e-10	0.265739	0.989	0.954	8.7163e-06	GluNeu	Bin1cKO_PBSvsControl_PBS
1557	Sgpp2	3.44055e-10	-1.56139	0.098	0.244	8.75483e-06	GluNeu	Bin1cKO_PBSvsControl_PBS
1558	Cabp1	3.4889e-10	0.634472	0.593	0.401	8.87786e-06	GluNeu	Bin1cKO_PBSvsControl_PBS
1559	Galnt18	3.7181e-10	0.560918	0.611	0.407	9.46109e-06	GluNeu	Bin1cKO_PBSvsControl_PBS
1560	Trmt9b	4.02054e-10	-1.91785	0.058	0.187	1.02307e-05	GluNeu	Bin1cKO_PBSvsControl_PBS
1561	Celf5	4.54807e-10	0.725838	0.464	0.275	1.1573e-05	GluNeu	Bin1cKO_PBSvsControl_PBS
1562	Lsamp	4.56226e-10	-0.448883	0.942	0.974	1.16091e-05	GluNeu	Bin1cKO_PBSvsControl_PBS
1563	Cdh8	4.97383e-10	-1.03597	0.373	0.528	1.26564e-05	GluNeu	Bin1cKO_PBSvsControl_PBS
1564	Arc	5.11984e-10	2.20414	0.12	0.026	1.3028e-05	GluNeu	Bin1cKO_PBSvsControl_PBS
1565	Nfia	5.16096e-10	-0.94164	0.318	0.488	1.31326e-05	GluNeu	Bin1cKO_PBSvsControl_PBS
1566	Asph	5.20021e-10	-1.34349	0.218	0.37	1.32324e-05	GluNeu	Bin1cKO_PBSvsControl_PBS
1567	Unc5b	5.69068e-10	-3.23643	0.011	0.106	1.44805e-05	GluNeu	Bin1cKO_PBSvsControl_PBS
1568	Slc24a4	5.71324e-10	1.11103	0.293	0.14	1.45379e-05	GluNeu	Bin1cKO_PBSvsControl_PBS
1569	Sntb2	5.76758e-10	0.764856	0.476	0.298	1.46762e-05	GluNeu	Bin1cKO_PBSvsControl_PBS
1570	Tcf20	6.00463e-10	0.59001	0.602	0.41	1.52794e-05	GluNeu	Bin1cKO_PBSvsControl_PBS
1571	Mbnl2	6.43203e-10	0.383111	0.844	0.656	1.6367e-05	GluNeu	Bin1cKO_PBSvsControl_PBS
1572	Csgalnact1	6.48143e-10	0.780044	0.44	0.256	1.64926e-05	GluNeu	Bin1cKO_PBSvsControl_PBS
1573	Ptprk	6.66686e-10	0.654568	0.562	0.373	1.69645e-05	GluNeu	Bin1cKO_PBSvsControl_PBS
1574	Adamts18	6.7217e-10	-1.84191	0.071	0.204	1.71041e-05	GluNeu	Bin1cKO_PBSvsControl_PBS
1575	Foxn3	6.81831e-10	-1.19615	0.289	0.438	1.73499e-05	GluNeu	Bin1cKO_PBSvsControl_PBS
1576	Ncam2	6.93383e-10	0.359771	0.778	0.556	1.76438e-05	GluNeu	Bin1cKO_PBSvsControl_PBS
1577	St6galnac5	7.09366e-10	0.819515	0.371	0.196	1.80505e-05	GluNeu	Bin1cKO_PBSvsControl_PBS
1578	Pdzd2	7.17316e-10	0.896437	0.42	0.252	1.82528e-05	GluNeu	Bin1cKO_PBSvsControl_PBS
1579	Gm15155	7.51034e-10	0.63666	0.527	0.335	1.91108e-05	GluNeu	Bin1cKO_PBSvsControl_PBS
1580	Shf	7.67228e-10	-2.09284	0.042	0.16	1.95229e-05	GluNeu	Bin1cKO_PBSvsControl_PBS
1581	Exoc6b	7.80227e-10	0.473474	0.713	0.511	1.98537e-05	GluNeu	Bin1cKO_PBSvsControl_PBS
1582	Pde3a	7.82471e-10	-3.47393	0.011	0.105	1.99107e-05	GluNeu	Bin1cKO_PBSvsControl_PBS
1583	Gm15810	7.99788e-10	0.95349	0.32	0.16	2.03514e-05	GluNeu	Bin1cKO_PBSvsControl_PBS
1584	Rbfox1	8.39951e-10	-0.373899	0.98	0.983	2.13734e-05	GluNeu	Bin1cKO_PBSvsControl_PBS
1585	Alcam	8.63947e-10	0.839416	0.462	0.292	2.1984e-05	GluNeu	Bin1cKO_PBSvsControl_PBS
1586	Ppfia4	9.10987e-10	-2.03953	0.053	0.176	2.3181e-05	GluNeu	Bin1cKO_PBSvsControl_PBS
1587	Sdk2	9.34332e-10	0.923619	0.367	0.201	2.3775e-05	GluNeu	Bin1cKO_PBSvsControl_PBS
1588	Gabrb2	9.62628e-10	-0.589064	0.811	0.843	2.4495e-05	GluNeu	Bin1cKO_PBSvsControl_PBS
1589	Kcnc2	1.02561e-09	0.543229	0.567	0.363	2.60976e-05	GluNeu	Bin1cKO_PBSvsControl_PBS
1590	Agap1	1.03046e-09	-1.2099	0.278	0.427	2.6221e-05	GluNeu	Bin1cKO_PBSvsControl_PBS
1591	Cntnap5a	1.05058e-09	0.458845	0.591	0.38	2.6733e-05	GluNeu	Bin1cKO_PBSvsControl_PBS
1592	Vps13a	1.07353e-09	0.358496	0.882	0.708	2.73169e-05	GluNeu	Bin1cKO_PBSvsControl_PBS
1593	Rims2	1.14595e-09	-0.410803	0.984	0.977	2.91599e-05	GluNeu	Bin1cKO_PBSvsControl_PBS
1594	Kcnj3	1.17806e-09	-0.555118	0.847	0.881	2.99769e-05	GluNeu	Bin1cKO_PBSvsControl_PBS
1595	Add3	1.19621e-09	-1.9002	0.051	0.173	3.04388e-05	GluNeu	Bin1cKO_PBSvsControl_PBS
1596	Tmem108	1.27292e-09	-0.814691	0.527	0.64	3.23907e-05	GluNeu	Bin1cKO_PBSvsControl_PBS
1597	Bcl11b	1.27933e-09	1.0441	0.302	0.15	3.25539e-05	GluNeu	Bin1cKO_PBSvsControl_PBS
1598	Susd6	1.30049e-09	-1.27716	0.198	0.349	3.30921e-05	GluNeu	Bin1cKO_PBSvsControl_PBS
1599	Epha7	1.3023e-09	0.526069	0.618	0.394	3.31382e-05	GluNeu	Bin1cKO_PBSvsControl_PBS
1600	Rtn4	1.31356e-09	0.73999	0.5	0.329	3.34248e-05	GluNeu	Bin1cKO_PBSvsControl_PBS
1601	Egfem1	1.35869e-09	0.621186	0.484	0.29	3.45731e-05	GluNeu	Bin1cKO_PBSvsControl_PBS
1602	Rora	1.39888e-09	-0.46683	0.898	0.915	3.55959e-05	GluNeu	Bin1cKO_PBSvsControl_PBS
1603	Erc1	1.56288e-09	-1.01909	0.536	0.616	3.9769e-05	GluNeu	Bin1cKO_PBSvsControl_PBS
1604	Pdgfc	1.65276e-09	1.29271	0.236	0.102	4.20561e-05	GluNeu	Bin1cKO_PBSvsControl_PBS
1605	Kif13a	1.69718e-09	-2.05889	0.044	0.16	4.31866e-05	GluNeu	Bin1cKO_PBSvsControl_PBS
1606	Add2	1.81714e-09	0.542463	0.609	0.424	4.6239e-05	GluNeu	Bin1cKO_PBSvsControl_PBS
1607	Xkr6	1.84612e-09	-1.04186	0.4	0.534	4.69764e-05	GluNeu	Bin1cKO_PBSvsControl_PBS
1608	4930473D10Rik	2.00824e-09	-1.19216	0.147	0.304	5.11018e-05	GluNeu	Bin1cKO_PBSvsControl_PBS
1609	Sulf2	2.04816e-09	1.87971	0.138	0.039	5.21174e-05	GluNeu	Bin1cKO_PBSvsControl_PBS
1610	Rasal1	2.08648e-09	0.989041	0.296	0.145	5.30924e-05	GluNeu	Bin1cKO_PBSvsControl_PBS
1611	9130024F11Rik	2.14054e-09	1.09821	0.298	0.151	5.44682e-05	GluNeu	Bin1cKO_PBSvsControl_PBS
1612	Cadm3	2.21125e-09	-1.13289	0.231	0.383	5.62674e-05	GluNeu	Bin1cKO_PBSvsControl_PBS
1613	Kcnj6	2.27134e-09	0.382624	0.851	0.687	5.77965e-05	GluNeu	Bin1cKO_PBSvsControl_PBS
1614	Btbd3	2.28121e-09	-1.69426	0.1	0.235	5.80478e-05	GluNeu	Bin1cKO_PBSvsControl_PBS
1615	Vxn	2.28739e-09	1.04064	0.3	0.151	5.8205e-05	GluNeu	Bin1cKO_PBSvsControl_PBS
1616	Pde3b	2.63312e-09	-1.61777	0.127	0.264	6.70024e-05	GluNeu	Bin1cKO_PBSvsControl_PBS
1617	Exph5	2.64998e-09	-1.21228	0.202	0.353	6.74314e-05	GluNeu	Bin1cKO_PBSvsControl_PBS
1618	Nell2	2.66301e-09	0.377889	0.862	0.733	6.7763e-05	GluNeu	Bin1cKO_PBSvsControl_PBS
1619	Snx30	2.71372e-09	-1.85536	0.078	0.205	6.90532e-05	GluNeu	Bin1cKO_PBSvsControl_PBS
1620	1700025G04Rik	2.75372e-09	-1.03872	0.329	0.472	7.00712e-05	GluNeu	Bin1cKO_PBSvsControl_PBS
1621	Ccnd2	2.77476e-09	1.2824	0.231	0.1	7.06067e-05	GluNeu	Bin1cKO_PBSvsControl_PBS
1622	Mmp16	2.86707e-09	0.452237	0.802	0.631	7.29554e-05	GluNeu	Bin1cKO_PBSvsControl_PBS
1623	Adcy1	2.90464e-09	-0.984511	0.382	0.514	7.39115e-05	GluNeu	Bin1cKO_PBSvsControl_PBS
1624	Tiam1	3.04442e-09	-0.735924	0.298	0.471	7.74683e-05	GluNeu	Bin1cKO_PBSvsControl_PBS
1625	Slc22a4	3.13497e-09	-2.16043	0.027	0.13	7.97726e-05	GluNeu	Bin1cKO_PBSvsControl_PBS
1626	Ndst3	3.37902e-09	-0.886254	0.46	0.577	8.59827e-05	GluNeu	Bin1cKO_PBSvsControl_PBS
1627	Hs3st4	3.60714e-09	0.673162	0.507	0.318	9.17874e-05	GluNeu	Bin1cKO_PBSvsControl_PBS
1628	Myrip	3.86419e-09	0.695306	0.478	0.306	9.83281e-05	GluNeu	Bin1cKO_PBSvsControl_PBS
1629	Nell1	4.01681e-09	0.570124	0.507	0.312	0.000102212	GluNeu	Bin1cKO_PBSvsControl_PBS
1630	Plekhg5	4.19588e-09	0.83609	0.36	0.198	0.000106768	GluNeu	Bin1cKO_PBSvsControl_PBS
1631	Lmo4	4.30809e-09	0.80437	0.402	0.235	0.000109624	GluNeu	Bin1cKO_PBSvsControl_PBS
1632	Vat1l	4.54852e-09	-1.92883	0.056	0.173	0.000115742	GluNeu	Bin1cKO_PBSvsControl_PBS
1633	Basp1	4.68351e-09	0.799634	0.407	0.242	0.000119177	GluNeu	Bin1cKO_PBSvsControl_PBS
1634	Fat1	4.92032e-09	-1.77227	0.069	0.191	0.000125202	GluNeu	Bin1cKO_PBSvsControl_PBS
1635	Kcnq2	5.08082e-09	0.659693	0.496	0.319	0.000129287	GluNeu	Bin1cKO_PBSvsControl_PBS
1636	Grk5	5.23431e-09	-1.93016	0.087	0.211	0.000133192	GluNeu	Bin1cKO_PBSvsControl_PBS
1637	Gucy1a2	5.23609e-09	0.357597	0.829	0.62	0.000133238	GluNeu	Bin1cKO_PBSvsControl_PBS
1638	Cck	5.29556e-09	1.25001	0.256	0.122	0.000134751	GluNeu	Bin1cKO_PBSvsControl_PBS
1639	Chd5	5.36622e-09	0.934349	0.298	0.15	0.000136549	GluNeu	Bin1cKO_PBSvsControl_PBS
1640	Fgf13	5.49039e-09	-1.41989	0.149	0.293	0.000139708	GluNeu	Bin1cKO_PBSvsControl_PBS
1641	Gm10115	5.66875e-09	0.779825	0.364	0.204	0.000144247	GluNeu	Bin1cKO_PBSvsControl_PBS
1642	B230209E15Rik	5.79098e-09	0.56469	0.5	0.31	0.000147357	GluNeu	Bin1cKO_PBSvsControl_PBS
1643	Smurf1	5.98267e-09	1.05251	0.298	0.154	0.000152235	GluNeu	Bin1cKO_PBSvsControl_PBS
1644	Enc1	6.52324e-09	1.52607	0.169	0.06	0.00016599	GluNeu	Bin1cKO_PBSvsControl_PBS
1645	Lurap1	7.86363e-09	-2.89539	0.013	0.1	0.000200098	GluNeu	Bin1cKO_PBSvsControl_PBS
1646	Slit1	7.89244e-09	0.989636	0.258	0.12	0.000200831	GluNeu	Bin1cKO_PBSvsControl_PBS
1647	Rapgef5	8.10284e-09	0.449673	0.547	0.344	0.000206185	GluNeu	Bin1cKO_PBSvsControl_PBS
1648	Atxn1	8.14258e-09	0.300398	0.976	0.847	0.000207196	GluNeu	Bin1cKO_PBSvsControl_PBS
1649	Dgkg	9.01341e-09	-0.994763	0.342	0.481	0.000229355	GluNeu	Bin1cKO_PBSvsControl_PBS
1650	Kctd17	9.03505e-09	1.20414	0.224	0.099	0.000229906	GluNeu	Bin1cKO_PBSvsControl_PBS
1651	Msra	9.35241e-09	-0.668309	0.687	0.733	0.000237981	GluNeu	Bin1cKO_PBSvsControl_PBS
1652	Nck1	9.3997e-09	-1.58013	0.073	0.196	0.000239185	GluNeu	Bin1cKO_PBSvsControl_PBS
1653	Grik4	9.43426e-09	0.578749	0.398	0.222	0.000240064	GluNeu	Bin1cKO_PBSvsControl_PBS
1654	Gabbr2	9.5581e-09	0.367807	0.878	0.731	0.000243215	GluNeu	Bin1cKO_PBSvsControl_PBS
1655	Wdr17	9.659e-09	0.585113	0.553	0.37	0.000245783	GluNeu	Bin1cKO_PBSvsControl_PBS
1656	Robo3	1.0055e-08	0.975595	0.231	0.1	0.000255861	GluNeu	Bin1cKO_PBSvsControl_PBS
1657	Cacng8	1.04434e-08	1.24853	0.209	0.088	0.000265743	GluNeu	Bin1cKO_PBSvsControl_PBS
1658	Slc9a9	1.05628e-08	0.579139	0.542	0.361	0.00026878	GluNeu	Bin1cKO_PBSvsControl_PBS
1659	Git2	1.16552e-08	-1.55366	0.084	0.21	0.000296578	GluNeu	Bin1cKO_PBSvsControl_PBS
1660	Pxn	1.23177e-08	-2.47393	0.024	0.119	0.000313437	GluNeu	Bin1cKO_PBSvsControl_PBS
1661	Kndc1	1.24646e-08	-2.2109	0.033	0.134	0.000317174	GluNeu	Bin1cKO_PBSvsControl_PBS
1662	Pip5k1b	1.30311e-08	-1.02647	0.229	0.384	0.000331589	GluNeu	Bin1cKO_PBSvsControl_PBS
1663	Rasgef1b	1.35924e-08	0.445308	0.762	0.585	0.000345872	GluNeu	Bin1cKO_PBSvsControl_PBS
1664	Pde2a	1.3756e-08	0.732998	0.429	0.267	0.000350036	GluNeu	Bin1cKO_PBSvsControl_PBS
1665	B230334C09Rik	1.42904e-08	0.789103	0.351	0.196	0.000363634	GluNeu	Bin1cKO_PBSvsControl_PBS
1666	Tnfrsf21	1.53784e-08	1.31456	0.198	0.082	0.000391318	GluNeu	Bin1cKO_PBSvsControl_PBS
1667	Pkp4	1.63561e-08	-0.986082	0.287	0.427	0.000416197	GluNeu	Bin1cKO_PBSvsControl_PBS
1668	Gm44643	1.66498e-08	1.3505	0.18	0.069	0.000423671	GluNeu	Bin1cKO_PBSvsControl_PBS
1669	Zfp536	1.69014e-08	-0.85008	0.144	0.302	0.000430073	GluNeu	Bin1cKO_PBSvsControl_PBS
1670	Lpgat1	1.82328e-08	0.681043	0.418	0.25	0.000463951	GluNeu	Bin1cKO_PBSvsControl_PBS
1671	Rnf165	1.85752e-08	0.790716	0.353	0.198	0.000472664	GluNeu	Bin1cKO_PBSvsControl_PBS
1672	Rgl1	1.8744e-08	0.791802	0.391	0.233	0.000476959	GluNeu	Bin1cKO_PBSvsControl_PBS
1673	Epb41l4b	1.9666e-08	-1.07913	0.231	0.375	0.000500421	GluNeu	Bin1cKO_PBSvsControl_PBS
1674	Rgs11	1.97918e-08	0.750856	0.38	0.221	0.000503623	GluNeu	Bin1cKO_PBSvsControl_PBS
1675	Ripor2	2.02313e-08	0.774982	0.338	0.185	0.000514807	GluNeu	Bin1cKO_PBSvsControl_PBS
1676	Esrrg	2.04324e-08	0.740468	0.471	0.31	0.000519923	GluNeu	Bin1cKO_PBSvsControl_PBS
1677	Sema6a	2.05966e-08	-1.57702	0.082	0.205	0.000524102	GluNeu	Bin1cKO_PBSvsControl_PBS
1678	Tut4	2.07294e-08	-0.84944	0.413	0.537	0.00052748	GluNeu	Bin1cKO_PBSvsControl_PBS
1679	Micu3	2.1329e-08	-0.897648	0.293	0.441	0.000542738	GluNeu	Bin1cKO_PBSvsControl_PBS
1680	Gm32014	2.1333e-08	1.14451	0.218	0.096	0.000542839	GluNeu	Bin1cKO_PBSvsControl_PBS
1681	Crtc3	2.24332e-08	-1.56139	0.109	0.235	0.000570835	GluNeu	Bin1cKO_PBSvsControl_PBS
1682	Syne2	2.26343e-08	-2.51207	0.029	0.123	0.000575953	GluNeu	Bin1cKO_PBSvsControl_PBS
1683	Lamp5	2.26703e-08	1.38489	0.196	0.082	0.000576869	GluNeu	Bin1cKO_PBSvsControl_PBS
1684	Dmtn	2.30071e-08	0.667113	0.418	0.252	0.000585439	GluNeu	Bin1cKO_PBSvsControl_PBS
1685	Arpp21	2.30279e-08	0.259344	0.993	0.927	0.000585968	GluNeu	Bin1cKO_PBSvsControl_PBS
1686	Nr6a1	2.49321e-08	0.505459	0.513	0.332	0.000634421	GluNeu	Bin1cKO_PBSvsControl_PBS
1687	Atp1a3	2.68377e-08	0.425817	0.689	0.508	0.000682912	GluNeu	Bin1cKO_PBSvsControl_PBS
1688	Nsg2	2.79963e-08	0.862594	0.307	0.162	0.000712395	GluNeu	Bin1cKO_PBSvsControl_PBS
1689	Pxylp1	2.81734e-08	-2.03032	0.033	0.131	0.000716899	GluNeu	Bin1cKO_PBSvsControl_PBS
1690	Bcl2l1	2.91669e-08	-2.16323	0.04	0.14	0.000742181	GluNeu	Bin1cKO_PBSvsControl_PBS
1691	Uchl1	2.98912e-08	1.31615	0.178	0.069	0.000760613	GluNeu	Bin1cKO_PBSvsControl_PBS
1692	Calm1	3.02171e-08	0.712885	0.442	0.287	0.000768904	GluNeu	Bin1cKO_PBSvsControl_PBS
1693	Tubb4a	3.1118e-08	-1.82352	0.051	0.159	0.000791829	GluNeu	Bin1cKO_PBSvsControl_PBS
1694	Osbpl3	3.2413e-08	0.778955	0.424	0.275	0.000824782	GluNeu	Bin1cKO_PBSvsControl_PBS
1695	Peak1	3.31374e-08	-1.24078	0.231	0.363	0.000843215	GluNeu	Bin1cKO_PBSvsControl_PBS
1696	Ccdc85a	3.40369e-08	0.62601	0.424	0.264	0.000866103	GluNeu	Bin1cKO_PBSvsControl_PBS
1697	Tenm3	3.44887e-08	0.776336	0.462	0.302	0.0008776	GluNeu	Bin1cKO_PBSvsControl_PBS
1698	Unc13b	3.64941e-08	0.634593	0.489	0.323	0.000928629	GluNeu	Bin1cKO_PBSvsControl_PBS
1699	Nwd2	3.73651e-08	0.5293	0.524	0.336	0.000950792	GluNeu	Bin1cKO_PBSvsControl_PBS
1700	Osbpl1a	3.99639e-08	0.684498	0.444	0.287	0.00101692	GluNeu	Bin1cKO_PBSvsControl_PBS
1701	Dgkd	4.0246e-08	-1.06225	0.293	0.421	0.0010241	GluNeu	Bin1cKO_PBSvsControl_PBS
1702	Tub	4.04471e-08	0.811226	0.364	0.216	0.00102922	GluNeu	Bin1cKO_PBSvsControl_PBS
1703	Dagla	4.14231e-08	0.94876	0.26	0.128	0.00105405	GluNeu	Bin1cKO_PBSvsControl_PBS
1704	Mcc	4.23365e-08	-1.29679	0.213	0.346	0.0010773	GluNeu	Bin1cKO_PBSvsControl_PBS
1705	Reps2	4.23406e-08	0.572863	0.518	0.344	0.0010774	GluNeu	Bin1cKO_PBSvsControl_PBS
1706	Prkag2	4.28552e-08	0.559936	0.609	0.466	0.00109049	GluNeu	Bin1cKO_PBSvsControl_PBS
1707	C230057M02Rik	4.30661e-08	0.749902	0.349	0.198	0.00109586	GluNeu	Bin1cKO_PBSvsControl_PBS
1708	Kif1b	4.42673e-08	-0.612977	0.742	0.761	0.00112643	GluNeu	Bin1cKO_PBSvsControl_PBS
1709	Adgra1	4.62437e-08	0.874964	0.258	0.127	0.00117672	GluNeu	Bin1cKO_PBSvsControl_PBS
1710	Tiam2	4.72862e-08	0.85257	0.313	0.173	0.00120324	GluNeu	Bin1cKO_PBSvsControl_PBS
1711	Atp2c1	4.73629e-08	0.636429	0.482	0.321	0.0012052	GluNeu	Bin1cKO_PBSvsControl_PBS
1712	Tusc3	4.7951e-08	0.488715	0.584	0.4	0.00122016	GluNeu	Bin1cKO_PBSvsControl_PBS
1713	Nsf	5.07192e-08	0.349519	0.793	0.603	0.0012906	GluNeu	Bin1cKO_PBSvsControl_PBS
1714	Pitpnm2	5.12497e-08	0.636876	0.462	0.301	0.0013041	GluNeu	Bin1cKO_PBSvsControl_PBS
1715	Rasgrp1	5.20653e-08	0.697835	0.387	0.23	0.00132485	GluNeu	Bin1cKO_PBSvsControl_PBS
1716	Tacc1	5.77272e-08	0.545241	0.538	0.366	0.00146893	GluNeu	Bin1cKO_PBSvsControl_PBS
1717	Lzts1	5.94958e-08	0.709291	0.413	0.261	0.00151393	GluNeu	Bin1cKO_PBSvsControl_PBS
1718	Cpeb1	5.95629e-08	0.7507	0.402	0.252	0.00151564	GluNeu	Bin1cKO_PBSvsControl_PBS
1719	Gm1992	6.28018e-08	0.560246	0.502	0.329	0.00159805	GluNeu	Bin1cKO_PBSvsControl_PBS
1720	Dleu2	6.31632e-08	-1.09124	0.271	0.407	0.00160725	GluNeu	Bin1cKO_PBSvsControl_PBS
1721	B830012L14Rik	6.42537e-08	0.582451	0.522	0.36	0.001635	GluNeu	Bin1cKO_PBSvsControl_PBS
1722	Ildr2	6.43972e-08	0.605391	0.467	0.301	0.00163865	GluNeu	Bin1cKO_PBSvsControl_PBS
1723	Sv2b	6.55453e-08	0.332189	0.898	0.747	0.00166787	GluNeu	Bin1cKO_PBSvsControl_PBS
1724	Unc5c	6.60537e-08	-0.716187	0.656	0.738	0.0016808	GluNeu	Bin1cKO_PBSvsControl_PBS
1725	Cerkl	6.78714e-08	-1.80735	0.051	0.154	0.00172706	GluNeu	Bin1cKO_PBSvsControl_PBS
1726	Pomgnt1	7.04482e-08	-1.7022	0.069	0.179	0.00179263	GluNeu	Bin1cKO_PBSvsControl_PBS
1727	Kif21b	7.65269e-08	1.34773	0.164	0.063	0.0019473	GluNeu	Bin1cKO_PBSvsControl_PBS
1728	Hpcal1	7.77048e-08	-2.19014	0.029	0.119	0.00197728	GluNeu	Bin1cKO_PBSvsControl_PBS
1729	Rnf130	7.80324e-08	-0.929996	0.324	0.449	0.00198561	GluNeu	Bin1cKO_PBSvsControl_PBS
1730	Plcl2	7.86355e-08	0.387529	0.742	0.573	0.00200096	GluNeu	Bin1cKO_PBSvsControl_PBS
1731	Mindy2	8.35656e-08	-1.3304	0.14	0.267	0.00212641	GluNeu	Bin1cKO_PBSvsControl_PBS
1732	Maf	8.47067e-08	-2.2109	0.031	0.122	0.00215545	GluNeu	Bin1cKO_PBSvsControl_PBS
1733	Myt1	8.52138e-08	-2.26534	0.024	0.111	0.00216835	GluNeu	Bin1cKO_PBSvsControl_PBS
1734	Smoc2	8.61916e-08	1.96347	0.1	0.025	0.00219323	GluNeu	Bin1cKO_PBSvsControl_PBS
1735	Selenom	8.73605e-08	-2.2109	0.031	0.122	0.00222297	GluNeu	Bin1cKO_PBSvsControl_PBS
1736	Ptch1	9.06751e-08	-1.8635	0.051	0.153	0.00230732	GluNeu	Bin1cKO_PBSvsControl_PBS
1737	Camk2n1	1.01584e-07	1.09509	0.249	0.127	0.00258492	GluNeu	Bin1cKO_PBSvsControl_PBS
1738	Aff2	1.03906e-07	0.611587	0.471	0.312	0.002644	GluNeu	Bin1cKO_PBSvsControl_PBS
1739	Prmt8	1.09657e-07	0.703856	0.38	0.231	0.00279033	GluNeu	Bin1cKO_PBSvsControl_PBS
1740	Nova1	1.10202e-07	-1.22567	0.136	0.264	0.0028042	GluNeu	Bin1cKO_PBSvsControl_PBS
1741	Cnih3	1.10404e-07	0.781326	0.278	0.144	0.00280934	GluNeu	Bin1cKO_PBSvsControl_PBS
1742	Tmem229b	1.1488e-07	-2.39993	0.02	0.102	0.00292323	GluNeu	Bin1cKO_PBSvsControl_PBS
1743	4933424G05Rik	1.25025e-07	0.653986	0.458	0.295	0.00318139	GluNeu	Bin1cKO_PBSvsControl_PBS
1744	Sp4	1.29929e-07	-1.3945	0.084	0.199	0.00330617	GluNeu	Bin1cKO_PBSvsControl_PBS
1745	Dcc	1.32364e-07	0.366733	0.638	0.458	0.00336813	GluNeu	Bin1cKO_PBSvsControl_PBS
1746	Col4a2	1.32707e-07	0.880912	0.284	0.153	0.00337687	GluNeu	Bin1cKO_PBSvsControl_PBS
1747	Clstn2	1.33197e-07	0.376654	0.853	0.673	0.00338932	GluNeu	Bin1cKO_PBSvsControl_PBS
1748	Apba1	1.33407e-07	-0.850561	0.518	0.61	0.00339468	GluNeu	Bin1cKO_PBSvsControl_PBS
1749	Sorcs1	1.38279e-07	0.379327	0.54	0.358	0.00351864	GluNeu	Bin1cKO_PBSvsControl_PBS
1750	Rtl4	1.42711e-07	0.638335	0.458	0.306	0.00363142	GluNeu	Bin1cKO_PBSvsControl_PBS
1751	Unc79	1.43274e-07	0.283934	0.864	0.694	0.00364574	GluNeu	Bin1cKO_PBSvsControl_PBS
1752	Grm3	1.51262e-07	0.403897	0.553	0.36	0.00384901	GluNeu	Bin1cKO_PBSvsControl_PBS
1753	Lrrc3b	1.5262e-07	-1.28685	0.22	0.347	0.00388358	GluNeu	Bin1cKO_PBSvsControl_PBS
1754	Rb1	1.56909e-07	-1.36618	0.14	0.262	0.0039927	GluNeu	Bin1cKO_PBSvsControl_PBS
1755	Pappa	1.63912e-07	-2.52704	0.02	0.1	0.00417091	GluNeu	Bin1cKO_PBSvsControl_PBS
1756	Pcp4	1.65503e-07	1.18173	0.209	0.097	0.00421138	GluNeu	Bin1cKO_PBSvsControl_PBS
1757	Dbn1	1.7035e-07	0.840704	0.309	0.174	0.00433473	GluNeu	Bin1cKO_PBSvsControl_PBS
1758	Aim2	1.7185e-07	-1.62826	0.062	0.167	0.00437289	GluNeu	Bin1cKO_PBSvsControl_PBS
1759	Mir9-3hg	1.75332e-07	0.665675	0.404	0.253	0.00446149	GluNeu	Bin1cKO_PBSvsControl_PBS
1760	Nr2c2	1.79568e-07	-0.97568	0.231	0.366	0.00456928	GluNeu	Bin1cKO_PBSvsControl_PBS
1761	Grb2	1.84158e-07	-1.39639	0.087	0.201	0.00468608	GluNeu	Bin1cKO_PBSvsControl_PBS
1762	Stx1a	1.84652e-07	0.684767	0.382	0.233	0.00469865	GluNeu	Bin1cKO_PBSvsControl_PBS
1763	Gm1043	1.91275e-07	0.847997	0.289	0.157	0.00486718	GluNeu	Bin1cKO_PBSvsControl_PBS
1764	Ly6h	1.98267e-07	0.799087	0.353	0.211	0.00504509	GluNeu	Bin1cKO_PBSvsControl_PBS
1765	Edil3	2.06319e-07	0.390605	0.536	0.346	0.00524999	GluNeu	Bin1cKO_PBSvsControl_PBS
1766	Lin28b	2.18995e-07	0.937137	0.249	0.127	0.00557255	GluNeu	Bin1cKO_PBSvsControl_PBS
1767	Nipsnap2	2.29362e-07	-1.4827	0.084	0.194	0.00583633	GluNeu	Bin1cKO_PBSvsControl_PBS
1768	Lmtk3	2.49343e-07	0.816659	0.304	0.171	0.00634478	GluNeu	Bin1cKO_PBSvsControl_PBS
1769	Mpp7	2.55689e-07	-1.60971	0.078	0.185	0.00650627	GluNeu	Bin1cKO_PBSvsControl_PBS
1770	Coro2b	2.61824e-07	-1.24511	0.16	0.284	0.00666238	GluNeu	Bin1cKO_PBSvsControl_PBS
1771	Sgcd	2.6865e-07	0.433491	0.476	0.313	0.00683606	GluNeu	Bin1cKO_PBSvsControl_PBS
1772	Nhsl2	2.74061e-07	-0.859822	0.356	0.48	0.00697377	GluNeu	Bin1cKO_PBSvsControl_PBS
1773	Zfp697	2.75794e-07	0.626419	0.436	0.282	0.00701787	GluNeu	Bin1cKO_PBSvsControl_PBS
1774	Hlf	2.81005e-07	0.815575	0.271	0.144	0.00715045	GluNeu	Bin1cKO_PBSvsControl_PBS
1775	Gabra5	2.98393e-07	1.19423	0.213	0.103	0.00759291	GluNeu	Bin1cKO_PBSvsControl_PBS
1776	Stmn1	2.99211e-07	1.14498	0.178	0.076	0.00761372	GluNeu	Bin1cKO_PBSvsControl_PBS
1777	Crhr1	2.99967e-07	-1.09716	0.124	0.247	0.00763296	GluNeu	Bin1cKO_PBSvsControl_PBS
1778	Atp11c	3.05907e-07	-1.5043	0.098	0.21	0.0077841	GluNeu	Bin1cKO_PBSvsControl_PBS
1779	Mtcl1	3.12107e-07	-0.790679	0.489	0.588	0.00794186	GluNeu	Bin1cKO_PBSvsControl_PBS
1780	Cntnap2	3.12157e-07	-0.331163	0.993	0.992	0.00794316	GluNeu	Bin1cKO_PBSvsControl_PBS
1781	Msi2	3.15228e-07	-1.09813	0.267	0.386	0.0080213	GluNeu	Bin1cKO_PBSvsControl_PBS
1782	Wdfy3	3.24063e-07	-0.734798	0.427	0.537	0.00824612	GluNeu	Bin1cKO_PBSvsControl_PBS
1783	Cerk	3.24686e-07	-2.19014	0.029	0.113	0.00826196	GluNeu	Bin1cKO_PBSvsControl_PBS
1784	Rbfox3	3.36196e-07	-0.457721	0.956	0.935	0.00855485	GluNeu	Bin1cKO_PBSvsControl_PBS
1785	Tmem164	3.46315e-07	-1.97218	0.038	0.127	0.00881233	GluNeu	Bin1cKO_PBSvsControl_PBS
1786	1700109K24Rik	3.51892e-07	0.504568	0.562	0.407	0.00895426	GluNeu	Bin1cKO_PBSvsControl_PBS
1787	Tenm2	3.73099e-07	0.272476	0.887	0.742	0.00949387	GluNeu	Bin1cKO_PBSvsControl_PBS
1788	Dlgap3	3.77294e-07	0.564397	0.498	0.346	0.00960063	GluNeu	Bin1cKO_PBSvsControl_PBS
1789	Zfp462	3.80344e-07	0.87635	0.298	0.171	0.00967824	GluNeu	Bin1cKO_PBSvsControl_PBS
1790	Ablim3	3.94742e-07	-1.39676	0.147	0.264	0.0100446	GluNeu	Bin1cKO_PBSvsControl_PBS
1791	Zfhx2	4.07597e-07	-1.2109	0.167	0.287	0.0103717	GluNeu	Bin1cKO_PBSvsControl_PBS
1792	Atp6v0c	4.08335e-07	0.628319	0.353	0.213	0.0103905	GluNeu	Bin1cKO_PBSvsControl_PBS
1793	Iqsec1	4.09552e-07	0.390377	0.74	0.566	0.0104215	GluNeu	Bin1cKO_PBSvsControl_PBS
1794	4930590L20Rik	4.12477e-07	0.64295	0.424	0.273	0.0104959	GluNeu	Bin1cKO_PBSvsControl_PBS
1795	Ranbp17	4.18117e-07	-1.51624	0.087	0.194	0.0106394	GluNeu	Bin1cKO_PBSvsControl_PBS
1796	Dusp16	4.24389e-07	-2.31523	0.022	0.1	0.010799	GluNeu	Bin1cKO_PBSvsControl_PBS
1797	Cntnap5c	4.26691e-07	0.827238	0.251	0.13	0.0108576	GluNeu	Bin1cKO_PBSvsControl_PBS
1798	Lyn	4.2989e-07	-1.48143	0.089	0.196	0.010939	GluNeu	Bin1cKO_PBSvsControl_PBS
1799	Enox2	4.32978e-07	-2.01366	0.051	0.145	0.0110176	GluNeu	Bin1cKO_PBSvsControl_PBS
1800	Reep1	4.45615e-07	0.516015	0.527	0.37	0.0113391	GluNeu	Bin1cKO_PBSvsControl_PBS
1801	Rapgef4	4.47166e-07	-0.441996	0.849	0.892	0.0113786	GluNeu	Bin1cKO_PBSvsControl_PBS
1802	Kcnc3	4.53397e-07	-1.31896	0.116	0.23	0.0115371	GluNeu	Bin1cKO_PBSvsControl_PBS
1803	Lyzl4	4.55589e-07	1.11103	0.204	0.097	0.0115929	GluNeu	Bin1cKO_PBSvsControl_PBS
1804	Synpo	4.56406e-07	0.77905	0.3	0.17	0.0116137	GluNeu	Bin1cKO_PBSvsControl_PBS
1805	Picalm	4.60327e-07	-1.39993	0.096	0.205	0.0117135	GluNeu	Bin1cKO_PBSvsControl_PBS
1806	Msrb3	4.76996e-07	1.13703	0.176	0.076	0.0121376	GluNeu	Bin1cKO_PBSvsControl_PBS
1807	Sept7	4.83791e-07	0.733227	0.318	0.184	0.0123105	GluNeu	Bin1cKO_PBSvsControl_PBS
1808	Rspo3	5.01375e-07	0.987043	0.218	0.106	0.012758	GluNeu	Bin1cKO_PBSvsControl_PBS
1809	Sh3rf1	5.12718e-07	0.803603	0.34	0.207	0.0130466	GluNeu	Bin1cKO_PBSvsControl_PBS
1810	Zbtb46	5.20147e-07	-1.33453	0.076	0.181	0.0132357	GluNeu	Bin1cKO_PBSvsControl_PBS
1811	Pcdh10	5.20576e-07	0.753479	0.287	0.157	0.0132466	GluNeu	Bin1cKO_PBSvsControl_PBS
1812	Ptn	5.28262e-07	0.828865	0.338	0.205	0.0134421	GluNeu	Bin1cKO_PBSvsControl_PBS
1813	Chrm1	5.32347e-07	1.22441	0.18	0.08	0.0135461	GluNeu	Bin1cKO_PBSvsControl_PBS
1814	Kcnk12	5.36838e-07	-1.69277	0.06	0.157	0.0136604	GluNeu	Bin1cKO_PBSvsControl_PBS
1815	Gpc6	5.37415e-07	0.811299	0.329	0.199	0.0136751	GluNeu	Bin1cKO_PBSvsControl_PBS
1816	9330159F19Rik	5.43416e-07	0.650397	0.42	0.278	0.0138278	GluNeu	Bin1cKO_PBSvsControl_PBS
1817	Grid2	5.48757e-07	-0.468987	0.711	0.807	0.0139637	GluNeu	Bin1cKO_PBSvsControl_PBS
1818	Cit	5.59295e-07	0.560596	0.524	0.375	0.0142318	GluNeu	Bin1cKO_PBSvsControl_PBS
1819	Ttc14	5.71309e-07	0.316792	0.758	0.566	0.0145375	GluNeu	Bin1cKO_PBSvsControl_PBS
1820	Tle2	5.80354e-07	-1.58436	0.047	0.139	0.0147677	GluNeu	Bin1cKO_PBSvsControl_PBS
1821	Hdac9	5.87055e-07	0.508119	0.647	0.481	0.0149382	GluNeu	Bin1cKO_PBSvsControl_PBS
1822	Ppp3ca	5.91613e-07	-0.266431	0.989	0.972	0.0150542	GluNeu	Bin1cKO_PBSvsControl_PBS
1823	Fmn2	5.94378e-07	0.322274	0.744	0.568	0.0151246	GluNeu	Bin1cKO_PBSvsControl_PBS
1824	Ptprr	5.94648e-07	-0.765053	0.467	0.574	0.0151314	GluNeu	Bin1cKO_PBSvsControl_PBS
1825	Cyfip2	6.11341e-07	0.373683	0.671	0.502	0.0155562	GluNeu	Bin1cKO_PBSvsControl_PBS
1826	Nr4a1	6.41431e-07	0.931325	0.267	0.147	0.0163219	GluNeu	Bin1cKO_PBSvsControl_PBS
1827	Reep3	6.46718e-07	-1.26534	0.153	0.272	0.0164564	GluNeu	Bin1cKO_PBSvsControl_PBS
1828	Nfib	6.94397e-07	-0.579648	0.567	0.682	0.0176696	GluNeu	Bin1cKO_PBSvsControl_PBS
1829	Ptprs	7.05588e-07	0.35006	0.733	0.565	0.0179544	GluNeu	Bin1cKO_PBSvsControl_PBS
1830	Clvs2	7.17544e-07	0.684573	0.351	0.215	0.0182586	GluNeu	Bin1cKO_PBSvsControl_PBS
1831	Prpf38b	7.35847e-07	-1.29248	0.118	0.231	0.0187244	GluNeu	Bin1cKO_PBSvsControl_PBS
1832	Gabpb2	7.56512e-07	-1.6545	0.053	0.147	0.0192502	GluNeu	Bin1cKO_PBSvsControl_PBS
1833	Efhd2	7.73509e-07	1.46097	0.133	0.049	0.0196827	GluNeu	Bin1cKO_PBSvsControl_PBS
1834	Olfm2	7.84985e-07	0.69825	0.324	0.191	0.0199747	GluNeu	Bin1cKO_PBSvsControl_PBS
1835	Bclaf3	8.33025e-07	1.37042	0.158	0.066	0.0211972	GluNeu	Bin1cKO_PBSvsControl_PBS
1836	Klhl33	8.4414e-07	-1.91687	0.033	0.116	0.02148	GluNeu	Bin1cKO_PBSvsControl_PBS
1837	Kat6a	8.59881e-07	-1.33555	0.082	0.187	0.0218805	GluNeu	Bin1cKO_PBSvsControl_PBS
1838	Slc35f4	8.66029e-07	0.401763	0.664	0.483	0.022037	GluNeu	Bin1cKO_PBSvsControl_PBS
1839	Fbxw11	8.85818e-07	-1.25871	0.196	0.309	0.0225405	GluNeu	Bin1cKO_PBSvsControl_PBS
1840	Ctdspl	8.94417e-07	0.652246	0.391	0.252	0.0227593	GluNeu	Bin1cKO_PBSvsControl_PBS
1841	Igsf9b	9.09073e-07	0.421452	0.6	0.431	0.0231323	GluNeu	Bin1cKO_PBSvsControl_PBS
1842	Robo1	9.21218e-07	0.54395	0.547	0.401	0.0234413	GluNeu	Bin1cKO_PBSvsControl_PBS
1843	Dlc1	9.42736e-07	0.628431	0.433	0.295	0.0239888	GluNeu	Bin1cKO_PBSvsControl_PBS
1844	Ndrg3	9.61509e-07	-0.691226	0.451	0.557	0.0244666	GluNeu	Bin1cKO_PBSvsControl_PBS
1845	Stat5b	9.62989e-07	-1.9145	0.058	0.15	0.0245042	GluNeu	Bin1cKO_PBSvsControl_PBS
1846	Slc12a2	9.68626e-07	-1.76766	0.064	0.159	0.0246476	GluNeu	Bin1cKO_PBSvsControl_PBS
1847	Zmiz1	9.89632e-07	-1.29084	0.164	0.278	0.0251822	GluNeu	Bin1cKO_PBSvsControl_PBS
1848	Ntrk3	1.01395e-06	-0.487478	0.764	0.826	0.025801	GluNeu	Bin1cKO_PBSvsControl_PBS
1849	Atcay	1.0181e-06	0.73252	0.313	0.184	0.0259065	GluNeu	Bin1cKO_PBSvsControl_PBS
1850	4930447C04Rik	1.03143e-06	0.814695	0.313	0.187	0.0262457	GluNeu	Bin1cKO_PBSvsControl_PBS
1851	Dennd5a	1.03748e-06	-1.55193	0.076	0.174	0.0263997	GluNeu	Bin1cKO_PBSvsControl_PBS
1852	Nav1	1.04547e-06	0.644946	0.344	0.208	0.0266031	GluNeu	Bin1cKO_PBSvsControl_PBS
1853	Clasp2	1.10791e-06	-0.605382	0.576	0.644	0.0281918	GluNeu	Bin1cKO_PBSvsControl_PBS
1854	Sec61a2	1.18116e-06	0.566035	0.384	0.241	0.0300559	GluNeu	Bin1cKO_PBSvsControl_PBS
1855	Gabra3	1.18537e-06	0.756682	0.344	0.216	0.030163	GluNeu	Bin1cKO_PBSvsControl_PBS
1856	Map4k4	1.18683e-06	-1.34494	0.08	0.182	0.0302001	GluNeu	Bin1cKO_PBSvsControl_PBS
1857	Rps6ka2	1.18935e-06	0.741458	0.28	0.156	0.0302643	GluNeu	Bin1cKO_PBSvsControl_PBS
1858	Spag5	1.19722e-06	1.50404	0.129	0.048	0.0304645	GluNeu	Bin1cKO_PBSvsControl_PBS
1859	Rasgrf2	1.21426e-06	0.584963	0.387	0.242	0.0308981	GluNeu	Bin1cKO_PBSvsControl_PBS
1860	Gm47283	1.28822e-06	-0.913801	0.218	0.341	0.0327801	GluNeu	Bin1cKO_PBSvsControl_PBS
1861	Atxn7l1	1.30913e-06	0.55478	0.409	0.265	0.033312	GluNeu	Bin1cKO_PBSvsControl_PBS
1862	Arpp19	1.31006e-06	0.906891	0.247	0.133	0.0333358	GluNeu	Bin1cKO_PBSvsControl_PBS
1863	Plekha6	1.33266e-06	0.567889	0.46	0.315	0.0339108	GluNeu	Bin1cKO_PBSvsControl_PBS
1864	Lrrk2	1.33971e-06	0.723669	0.404	0.27	0.0340901	GluNeu	Bin1cKO_PBSvsControl_PBS
1865	Stmn2	1.37174e-06	-0.874376	0.422	0.519	0.0349052	GluNeu	Bin1cKO_PBSvsControl_PBS
1866	4921511I17Rik	1.44205e-06	1.14992	0.184	0.086	0.0366943	GluNeu	Bin1cKO_PBSvsControl_PBS
1867	Fam135a	1.46421e-06	-0.896164	0.207	0.33	0.0372584	GluNeu	Bin1cKO_PBSvsControl_PBS
1868	Stat2	1.47503e-06	-1.47393	0.078	0.176	0.0375336	GluNeu	Bin1cKO_PBSvsControl_PBS
1869	Hivep1	1.48923e-06	0.765076	0.267	0.147	0.037895	GluNeu	Bin1cKO_PBSvsControl_PBS
1870	Gm48239	1.51779e-06	0.539008	0.427	0.281	0.0386217	GluNeu	Bin1cKO_PBSvsControl_PBS
1871	Gm2824	1.51862e-06	0.97673	0.229	0.12	0.0386427	GluNeu	Bin1cKO_PBSvsControl_PBS
1872	Nme7	1.56682e-06	0.530951	0.504	0.369	0.0398694	GluNeu	Bin1cKO_PBSvsControl_PBS
1873	Camkk1	1.62731e-06	1.06664	0.202	0.1	0.0414085	GluNeu	Bin1cKO_PBSvsControl_PBS
1874	Gm20754	1.62809e-06	0.426778	0.447	0.29	0.0414284	GluNeu	Bin1cKO_PBSvsControl_PBS
1875	Gm27153	1.66671e-06	0.821525	0.229	0.117	0.0424111	GluNeu	Bin1cKO_PBSvsControl_PBS
1876	Rabgap1l	1.69287e-06	-0.438252	0.876	0.866	0.0430768	GluNeu	Bin1cKO_PBSvsControl_PBS
1877	Gm32442	1.7316e-06	1.19349	0.158	0.068	0.0440623	GluNeu	Bin1cKO_PBSvsControl_PBS
1878	Stard5	1.75156e-06	-1.90689	0.027	0.102	0.0445702	GluNeu	Bin1cKO_PBSvsControl_PBS
1879	Syt5	1.87072e-06	1.0115	0.204	0.102	0.0476024	GluNeu	Bin1cKO_PBSvsControl_PBS
1880	Sorcs2	1.90298e-06	0.894851	0.22	0.113	0.0484233	GluNeu	Bin1cKO_PBSvsControl_PBS
1881	Greb1l	1.91971e-06	0.761089	0.282	0.16	0.0488489	GluNeu	Bin1cKO_PBSvsControl_PBS
1882	Pacs1	1.96329e-06	0.503958	0.48	0.332	0.0499579	GluNeu	Bin1cKO_PBSvsControl_PBS
1883	AC149090.1	1.08201e-30	-1.05871	0.648	0.867	2.75329e-26	GABANeu	Bin1cKO_PBSvsControl_PBS
1884	Gm42418	2.37649e-29	0.750473	0.973	0.909	6.04722e-25	GABANeu	Bin1cKO_PBSvsControl_PBS
1885	Gng7	1.73017e-18	1.42919	0.437	0.186	4.40259e-14	GABANeu	Bin1cKO_PBSvsControl_PBS
1886	Phactr1	1.01256e-15	0.822259	0.861	0.772	2.57656e-11	GABANeu	Bin1cKO_PBSvsControl_PBS
1887	Kcnab1	1.12883e-15	0.866409	0.63	0.394	2.87242e-11	GABANeu	Bin1cKO_PBSvsControl_PBS
1888	Adcy5	1.9586e-15	1.10014	0.501	0.266	4.98385e-11	GABANeu	Bin1cKO_PBSvsControl_PBS
1889	Rgs9	2.20457e-15	0.971322	0.514	0.263	5.60976e-11	GABANeu	Bin1cKO_PBSvsControl_PBS
1890	Dlgap1	5.75188e-15	-0.697228	0.805	0.881	1.46362e-10	GABANeu	Bin1cKO_PBSvsControl_PBS
1891	Fam155a	7.45164e-15	-0.539422	0.817	0.935	1.89615e-10	GABANeu	Bin1cKO_PBSvsControl_PBS
1892	Rarb	9.17234e-15	0.972469	0.556	0.336	2.33399e-10	GABANeu	Bin1cKO_PBSvsControl_PBS
1893	Foxp2	1.80934e-14	1.10738	0.484	0.254	4.60405e-10	GABANeu	Bin1cKO_PBSvsControl_PBS
1894	Cacna1d	2.40046e-14	-0.865977	0.648	0.781	6.10822e-10	GABANeu	Bin1cKO_PBSvsControl_PBS
1895	Gnal	4.55757e-14	0.843312	0.613	0.392	1.15972e-09	GABANeu	Bin1cKO_PBSvsControl_PBS
1896	Pde8b	1.83944e-13	0.806246	0.574	0.34	4.68063e-09	GABANeu	Bin1cKO_PBSvsControl_PBS
1897	A330015K06Rik	1.92935e-13	0.940576	0.566	0.347	4.90943e-09	GABANeu	Bin1cKO_PBSvsControl_PBS
1898	Arhgap26	2.48812e-13	0.910404	0.525	0.301	6.33126e-09	GABANeu	Bin1cKO_PBSvsControl_PBS
1899	Pde7b	2.53106e-13	1.18146	0.505	0.305	6.44053e-09	GABANeu	Bin1cKO_PBSvsControl_PBS
1900	Dnah11	2.72589e-13	-2.73356	0.04	0.168	6.93631e-09	GABANeu	Bin1cKO_PBSvsControl_PBS
1901	Ryr3	4.76017e-13	0.828248	0.664	0.485	1.21127e-08	GABANeu	Bin1cKO_PBSvsControl_PBS
1902	Gm21798	7.23497e-13	-1.20956	0.146	0.331	1.84101e-08	GABANeu	Bin1cKO_PBSvsControl_PBS
1903	Chn1	1.22971e-12	0.85802	0.578	0.371	3.12913e-08	GABANeu	Bin1cKO_PBSvsControl_PBS
1904	Ppm1e	1.4437e-12	-0.808739	0.539	0.727	3.67363e-08	GABANeu	Bin1cKO_PBSvsControl_PBS
1905	Kctd16	2.57006e-12	0.669217	0.703	0.515	6.53978e-08	GABANeu	Bin1cKO_PBSvsControl_PBS
1906	Sobp	2.98842e-12	-0.821132	0.373	0.573	7.60433e-08	GABANeu	Bin1cKO_PBSvsControl_PBS
1907	Dscam	5.90851e-12	-0.675075	0.342	0.562	1.50348e-07	GABANeu	Bin1cKO_PBSvsControl_PBS
1908	Adam23	7.45861e-12	0.866564	0.501	0.294	1.89792e-07	GABANeu	Bin1cKO_PBSvsControl_PBS
1909	Tac1	1.21158e-11	1.55096	0.329	0.152	3.08299e-07	GABANeu	Bin1cKO_PBSvsControl_PBS
1910	Gpr88	1.36297e-11	1.57271	0.244	0.082	3.46822e-07	GABANeu	Bin1cKO_PBSvsControl_PBS
1911	Hsp90ab1	1.47289e-11	1.05184	0.411	0.219	3.74792e-07	GABANeu	Bin1cKO_PBSvsControl_PBS
1912	Adcy8	1.54101e-11	-1.16998	0.193	0.375	3.92125e-07	GABANeu	Bin1cKO_PBSvsControl_PBS
1913	Ptpn5	3.01973e-11	0.859993	0.478	0.277	7.68399e-07	GABANeu	Bin1cKO_PBSvsControl_PBS
1914	Camk4	3.15255e-11	0.850451	0.574	0.399	8.02199e-07	GABANeu	Bin1cKO_PBSvsControl_PBS
1915	Cdk14	3.62464e-11	-0.750664	0.412	0.601	9.22325e-07	GABANeu	Bin1cKO_PBSvsControl_PBS
1916	Ephb1	4.05181e-11	0.94802	0.454	0.252	1.03102e-06	GABANeu	Bin1cKO_PBSvsControl_PBS
1917	Hpca	4.06312e-11	2.00176	0.207	0.063	1.0339e-06	GABANeu	Bin1cKO_PBSvsControl_PBS
1918	Pcbp3	4.68584e-11	-1.16573	0.338	0.501	1.19236e-06	GABANeu	Bin1cKO_PBSvsControl_PBS
1919	Nedd4l	5.37561e-11	0.633397	0.686	0.515	1.36788e-06	GABANeu	Bin1cKO_PBSvsControl_PBS
1920	Gm10754	5.65555e-11	1.13142	0.344	0.163	1.43911e-06	GABANeu	Bin1cKO_PBSvsControl_PBS
1921	Prune2	5.75782e-11	-1.23283	0.125	0.282	1.46513e-06	GABANeu	Bin1cKO_PBSvsControl_PBS
1922	Sphkap	5.85073e-11	-1.21969	0.175	0.343	1.48878e-06	GABANeu	Bin1cKO_PBSvsControl_PBS
1923	Luzp2	7.31245e-11	-1.03307	0.277	0.459	1.86073e-06	GABANeu	Bin1cKO_PBSvsControl_PBS
1924	Calm1	7.95322e-11	1.08728	0.426	0.245	2.02378e-06	GABANeu	Bin1cKO_PBSvsControl_PBS
1925	Zfp608	9.55516e-11	-0.78679	0.346	0.531	2.43141e-06	GABANeu	Bin1cKO_PBSvsControl_PBS
1926	Srgap1	1.41193e-10	1.15516	0.324	0.149	3.5928e-06	GABANeu	Bin1cKO_PBSvsControl_PBS
1927	Cacna2d3	1.64349e-10	0.662169	0.648	0.48	4.18203e-06	GABANeu	Bin1cKO_PBSvsControl_PBS
1928	Kcnj3	1.78832e-10	-0.614916	0.467	0.681	4.55055e-06	GABANeu	Bin1cKO_PBSvsControl_PBS
1929	Pde1b	1.82054e-10	1.18676	0.347	0.175	4.63256e-06	GABANeu	Bin1cKO_PBSvsControl_PBS
1930	Grm5	2.01104e-10	0.456079	0.868	0.814	5.11728e-06	GABANeu	Bin1cKO_PBSvsControl_PBS
1931	Ppfia2	3.55261e-10	-0.549926	0.852	0.89	9.03997e-06	GABANeu	Bin1cKO_PBSvsControl_PBS
1932	Gpm6b	3.83056e-10	0.833963	0.502	0.324	9.74725e-06	GABANeu	Bin1cKO_PBSvsControl_PBS
1933	Osbpl8	3.96531e-10	0.678627	0.693	0.573	1.00901e-05	GABANeu	Bin1cKO_PBSvsControl_PBS
1934	Robo1	3.99538e-10	0.479087	0.784	0.618	1.01666e-05	GABANeu	Bin1cKO_PBSvsControl_PBS
1935	Slc8a1	4.58121e-10	-0.659098	0.546	0.704	1.16573e-05	GABANeu	Bin1cKO_PBSvsControl_PBS
1936	Adamts3	5.64372e-10	0.84886	0.498	0.329	1.4361e-05	GABANeu	Bin1cKO_PBSvsControl_PBS
1937	Gsg1l	5.75467e-10	1.19771	0.291	0.131	1.46433e-05	GABANeu	Bin1cKO_PBSvsControl_PBS
1938	Phactr2	6.07807e-10	-1.70655	0.059	0.177	1.54662e-05	GABANeu	Bin1cKO_PBSvsControl_PBS
1939	Cntnap4	6.62684e-10	-0.934957	0.262	0.431	1.68627e-05	GABANeu	Bin1cKO_PBSvsControl_PBS
1940	Gria4	7.04554e-10	-0.65737	0.747	0.841	1.79281e-05	GABANeu	Bin1cKO_PBSvsControl_PBS
1941	Ppp1r9a	7.40308e-10	0.616117	0.737	0.648	1.88379e-05	GABANeu	Bin1cKO_PBSvsControl_PBS
1942	Ivns1abp	1.01421e-09	1.17728	0.315	0.154	2.58076e-05	GABANeu	Bin1cKO_PBSvsControl_PBS
1943	Cpa6	1.0576e-09	-1.52579	0.145	0.289	2.69117e-05	GABANeu	Bin1cKO_PBSvsControl_PBS
1944	Srrm4	1.07219e-09	-0.721017	0.297	0.485	2.72829e-05	GABANeu	Bin1cKO_PBSvsControl_PBS
1945	Camk2d	1.3172e-09	-0.826661	0.254	0.427	3.35175e-05	GABANeu	Bin1cKO_PBSvsControl_PBS
1946	Ndrg4	1.37798e-09	0.66186	0.67	0.503	3.50641e-05	GABANeu	Bin1cKO_PBSvsControl_PBS
1947	Ablim3	1.47397e-09	-1.04574	0.225	0.385	3.75066e-05	GABANeu	Bin1cKO_PBSvsControl_PBS
1948	Dcc	1.70982e-09	0.500561	0.793	0.662	4.35082e-05	GABANeu	Bin1cKO_PBSvsControl_PBS
1949	Dync1i1	1.76908e-09	-0.974058	0.502	0.618	4.5016e-05	GABANeu	Bin1cKO_PBSvsControl_PBS
1950	AY036118	1.80666e-09	0.535052	0.796	0.713	4.59723e-05	GABANeu	Bin1cKO_PBSvsControl_PBS
1951	Grm7	2.03607e-09	0.447911	0.77	0.636	5.18099e-05	GABANeu	Bin1cKO_PBSvsControl_PBS
1952	Tcf4	2.09134e-09	-0.374782	0.531	0.751	5.32163e-05	GABANeu	Bin1cKO_PBSvsControl_PBS
1953	Rap1gap	2.45125e-09	0.880779	0.42	0.247	6.23744e-05	GABANeu	Bin1cKO_PBSvsControl_PBS
1954	Scn4b	2.81583e-09	1.88758	0.169	0.049	7.16516e-05	GABANeu	Bin1cKO_PBSvsControl_PBS
1955	Zeb2	3.11799e-09	-0.739646	0.373	0.55	7.93404e-05	GABANeu	Bin1cKO_PBSvsControl_PBS
1956	Drd1	3.66189e-09	1.53603	0.193	0.065	9.31806e-05	GABANeu	Bin1cKO_PBSvsControl_PBS
1957	Pde4d	4.07954e-09	-0.490187	0.659	0.8	0.000103808	GABANeu	Bin1cKO_PBSvsControl_PBS
1958	Galnt13	4.72407e-09	0.586797	0.731	0.643	0.000120209	GABANeu	Bin1cKO_PBSvsControl_PBS
1959	Kcnd3	5.30202e-09	-0.930991	0.359	0.513	0.000134915	GABANeu	Bin1cKO_PBSvsControl_PBS
1960	Pcp4	5.48775e-09	1.05161	0.396	0.24	0.000139641	GABANeu	Bin1cKO_PBSvsControl_PBS
1961	Slc9a9	6.76396e-09	-0.927855	0.21	0.368	0.000172116	GABANeu	Bin1cKO_PBSvsControl_PBS
1962	Kcnip1	8.27098e-09	-0.919904	0.312	0.473	0.000210463	GABANeu	Bin1cKO_PBSvsControl_PBS
1963	Oxr1	1.0015e-08	-0.607194	0.385	0.566	0.000254842	GABANeu	Bin1cKO_PBSvsControl_PBS
1964	Ppp3ca	1.01886e-08	0.543206	0.877	0.797	0.000259259	GABANeu	Bin1cKO_PBSvsControl_PBS
1965	Inpp4b	1.087e-08	-0.952497	0.294	0.455	0.000276597	GABANeu	Bin1cKO_PBSvsControl_PBS
1966	Kcnk2	1.13401e-08	0.733849	0.432	0.256	0.00028856	GABANeu	Bin1cKO_PBSvsControl_PBS
1967	Usp46	1.28913e-08	-1.15924	0.193	0.336	0.000328031	GABANeu	Bin1cKO_PBSvsControl_PBS
1968	Nrxn1	1.35383e-08	-0.361847	0.98	0.993	0.000344495	GABANeu	Bin1cKO_PBSvsControl_PBS
1969	Fras1	1.39463e-08	0.59868	0.476	0.289	0.000354877	GABANeu	Bin1cKO_PBSvsControl_PBS
1970	Ngef	1.3985e-08	0.926159	0.314	0.159	0.000355862	GABANeu	Bin1cKO_PBSvsControl_PBS
1971	Hdac4	1.46876e-08	-0.880649	0.213	0.364	0.000373741	GABANeu	Bin1cKO_PBSvsControl_PBS
1972	Strn	1.51855e-08	1.10229	0.364	0.214	0.000386409	GABANeu	Bin1cKO_PBSvsControl_PBS
1973	Astn2	1.54108e-08	-0.781418	0.435	0.592	0.000392144	GABANeu	Bin1cKO_PBSvsControl_PBS
1974	Diaph2	1.57742e-08	0.578787	0.61	0.462	0.000401391	GABANeu	Bin1cKO_PBSvsControl_PBS
1975	Alcam	1.58703e-08	0.73602	0.516	0.354	0.000403835	GABANeu	Bin1cKO_PBSvsControl_PBS
1976	Foxp1	1.6673e-08	0.811439	0.65	0.583	0.000424262	GABANeu	Bin1cKO_PBSvsControl_PBS
1977	Anks1b	1.72332e-08	0.281891	0.992	0.988	0.000438517	GABANeu	Bin1cKO_PBSvsControl_PBS
1978	Dbp	1.99622e-08	1.67049	0.167	0.054	0.000507959	GABANeu	Bin1cKO_PBSvsControl_PBS
1979	Zfp804a	2.14003e-08	0.4397	0.601	0.41	0.000544553	GABANeu	Bin1cKO_PBSvsControl_PBS
1980	Rftn1	2.47725e-08	-1.60342	0.079	0.191	0.00063036	GABANeu	Bin1cKO_PBSvsControl_PBS
1981	Rgs20	2.51242e-08	0.944375	0.367	0.214	0.00063931	GABANeu	Bin1cKO_PBSvsControl_PBS
1982	Nlk	2.58999e-08	0.620301	0.691	0.529	0.000659049	GABANeu	Bin1cKO_PBSvsControl_PBS
1983	Xkr6	2.72816e-08	0.515856	0.653	0.483	0.000694209	GABANeu	Bin1cKO_PBSvsControl_PBS
1984	Pcsk2	2.80144e-08	0.523069	0.715	0.615	0.000712855	GABANeu	Bin1cKO_PBSvsControl_PBS
1985	Sgcz	2.82597e-08	0.496527	0.725	0.608	0.000719096	GABANeu	Bin1cKO_PBSvsControl_PBS
1986	Pde2a	3.48588e-08	0.714244	0.47	0.303	0.000887017	GABANeu	Bin1cKO_PBSvsControl_PBS
1987	Ptprk	4.38238e-08	-1.56274	0.104	0.219	0.00111514	GABANeu	Bin1cKO_PBSvsControl_PBS
1988	Chchd10	4.58758e-08	1.94148	0.131	0.033	0.00116736	GABANeu	Bin1cKO_PBSvsControl_PBS
1989	Hdac9	5.26069e-08	-0.686826	0.554	0.688	0.00133863	GABANeu	Bin1cKO_PBSvsControl_PBS
1990	Ccdc88c	5.43229e-08	1.25133	0.216	0.091	0.0013823	GABANeu	Bin1cKO_PBSvsControl_PBS
1991	Gm28905	5.45029e-08	0.741718	0.393	0.224	0.00138688	GABANeu	Bin1cKO_PBSvsControl_PBS
1992	St6galnac5	5.56035e-08	0.769461	0.499	0.347	0.00141489	GABANeu	Bin1cKO_PBSvsControl_PBS
1993	Ppm1l	5.6018e-08	-0.606303	0.399	0.562	0.00142543	GABANeu	Bin1cKO_PBSvsControl_PBS
1994	Aig1	5.7983e-08	-0.640171	0.434	0.578	0.00147543	GABANeu	Bin1cKO_PBSvsControl_PBS
1995	Mbnl2	5.87247e-08	0.610452	0.659	0.55	0.00149431	GABANeu	Bin1cKO_PBSvsControl_PBS
1996	Lmo7	6.50797e-08	0.867779	0.388	0.238	0.00165602	GABANeu	Bin1cKO_PBSvsControl_PBS
1997	Ubash3b	6.61498e-08	-0.811953	0.227	0.373	0.00168325	GABANeu	Bin1cKO_PBSvsControl_PBS
1998	Pparg	6.79172e-08	-1.06863	0.117	0.24	0.00172822	GABANeu	Bin1cKO_PBSvsControl_PBS
[truncated: 4,223 more rows]
