# Supplementary material for: Microglial BIN1 deficiency elicits enhanced microglial inflammatory responses that mimic early AD pathology
Source: Research Square preprint supplement (doi:10.21203/rs.3.rs-7262443/v1), 2025-08-14
Supplement: Supplementary file 4 [file b29d551f912d9c4a191abbc6.xlsx]

## Sheet: DEGs
Suppl. File 4: DEGs (log2FC>0.25 and p value<0.01) for each microglia cluster compared with all other clusters
Gene	p_val	avg_log2FC	pct.1	pct.2	p_val_adj	cluster
Sik3	5.77479e-47	1.48097	0.413	0.147	8.50511e-43	0
Kcnma1	1.74588e-38	1.09072	0.522	0.256	2.57134e-34	0
Abca1	5.02256e-36	0.699433	0.81	0.553	7.39722e-32	0
A830008E24Rik	8.80804e-36	0.982103	0.634	0.367	1.29725e-31	0
Camk1d	1.9536e-35	0.537477	0.946	0.83	2.87725e-31	0
Neat1	1.30506e-34	1.35117	0.332	0.121	1.92209e-30	0
Gm13710	2.62322e-33	1.16846	0.421	0.191	3.86348e-29	0
Gm40645	7.03529e-33	1.00114	0.455	0.213	1.03616e-28	0
Vav2	1.10368e-31	0.90452	0.527	0.274	1.6255e-27	0
Anapc15	1.8132e-31	1.08243	0.451	0.218	2.67048e-27	0
Ank2	2.56278e-31	0.764016	0.617	0.343	3.77446e-27	0
Tbc1d8	1.62644e-30	1.14707	0.387	0.171	2.39542e-26	0
Pnpla7	3.61929e-29	0.59739	0.844	0.639	5.33049e-25	0
Gphn	4.98689e-29	0.931008	0.451	0.221	7.3447e-25	0
Mthfs	1.11626e-28	0.883585	0.543	0.305	1.64403e-24	0
Plek	4.80434e-27	0.945833	0.498	0.276	7.07583e-23	0
Sorl1	7.79178e-27	1.32395	0.283	0.109	1.14757e-22	0
Peli1	1.23829e-26	0.65742	0.73	0.498	1.82375e-22	0
Ctsb	1.7963e-26	0.615161	0.644	0.387	2.64559e-22	0
Arhgap24	2.5948e-26	1.03927	0.452	0.24	3.82163e-22	0
Mbd5	4.39461e-26	0.646735	0.644	0.396	6.47238e-22	0
Fgd4	6.05058e-26	0.82654	0.498	0.276	8.91129e-22	0
Bcas3	1.07356e-25	0.824938	0.575	0.356	1.58114e-21	0
Ankrd12	1.08119e-25	0.921786	0.471	0.259	1.59237e-21	0
Dlg1	1.10217e-25	1.00284	0.376	0.177	1.62328e-21	0
Adgre1	1.27214e-25	0.72842	0.571	0.338	1.87361e-21	0
Rin2	2.31301e-25	0.84784	0.475	0.26	3.4066e-21	0
Tspan7	4.7665e-25	0.998938	0.388	0.191	7.02011e-21	0
Myo9a	1.3272e-24	0.63043	0.672	0.447	1.9547e-20	0
Cd84	3.03347e-24	0.656258	0.671	0.438	4.46769e-20	0
Frrs1	4.45304e-24	0.709843	0.57	0.341	6.55843e-20	0
Cacna1d	6.63441e-24	0.558596	0.76	0.536	9.77116e-20	0
Lacc1	7.02737e-24	0.654721	0.563	0.334	1.03499e-19	0
Ncoa1	1.15929e-23	1.11259	0.357	0.174	1.7074e-19	0
Tulp4	1.31905e-23	1.04307	0.398	0.208	1.9427e-19	0
Gm26740	1.4613e-23	0.792734	0.542	0.331	2.15221e-19	0
Tcf12	2.21476e-23	0.640462	0.639	0.416	3.26189e-19	0
Fnbp1	2.43332e-23	0.627455	0.661	0.424	3.58379e-19	0
Capn3	3.90621e-23	0.64305	0.67	0.437	5.75307e-19	0
Rassf4	5.82082e-23	0.973388	0.35	0.166	8.5729e-19	0
Fyb	7.12131e-23	0.416351	0.963	0.886	1.04883e-18	0
Csf3r	9.03265e-23	0.4856	0.854	0.654	1.33033e-18	0
Scaper	2.1492e-22	0.809618	0.484	0.28	3.16533e-18	0
Arhgap25	5.06232e-22	0.73469	0.538	0.331	7.45579e-18	0
Rcbtb2	9.77566e-22	0.651607	0.625	0.406	1.43976e-17	0
Arid5b	1.35343e-21	0.773931	0.505	0.307	1.99334e-17	0
Exoc6b	1.75774e-21	0.70598	0.486	0.282	2.5888e-17	0
Blnk	3.11989e-21	0.471933	0.759	0.536	4.59498e-17	0
Dnajc13	3.42657e-21	0.643065	0.553	0.336	5.04665e-17	0
Slc12a2	4.00888e-21	0.823541	0.377	0.192	5.90427e-17	0
Atp8a1	4.03078e-21	0.464649	0.86	0.681	5.93653e-17	0
Lncpint	6.33691e-21	0.642205	0.581	0.365	9.33301e-17	0
Sipa1l2	7.00173e-21	0.575324	0.65	0.419	1.03121e-16	0
Pbxip1	7.26226e-21	1.02551	0.254	0.103	1.06959e-16	0
Kif13b	8.19708e-21	0.710183	0.472	0.27	1.20727e-16	0
Havcr2	8.24834e-21	0.552147	0.639	0.412	1.21482e-16	0
Pvt1	8.72388e-21	0.788303	0.555	0.356	1.28485e-16	0
Flcn	1.15444e-20	1.12448	0.286	0.129	1.70025e-16	0
Gm12185	1.22586e-20	0.93523	0.328	0.158	1.80544e-16	0
Zmynd8	1.8961e-20	0.721389	0.483	0.281	2.79258e-16	0
Prpf38b	3.62275e-20	0.694903	0.458	0.257	5.33559e-16	0
Vps41	3.94342e-20	0.8676	0.388	0.209	5.80787e-16	0
Zeb1	4.06792e-20	0.483181	0.725	0.507	5.99123e-16	0
Elf2	4.5209e-20	0.654606	0.488	0.285	6.65838e-16	0
Dram2	6.5132e-20	0.678373	0.469	0.273	9.59264e-16	0
Ube2b	1.06027e-19	0.85941	0.361	0.189	1.56156e-15	0
Tpd52	1.25747e-19	0.680334	0.426	0.235	1.852e-15	0
Ppm1h	2.03757e-19	0.474696	0.871	0.75	3.00093e-15	0
Atp8a2	2.37169e-19	0.439026	0.878	0.726	3.49302e-15	0
Lpgat1	2.70534e-19	0.952871	0.319	0.158	3.98443e-15	0
Myo1f	2.9809e-19	0.451187	0.821	0.647	4.39026e-15	0
Abcg1	3.38158e-19	0.956922	0.313	0.153	4.98039e-15	0
Tbc1d14	3.87109e-19	0.680406	0.501	0.307	5.70134e-15	0
Zdhhc14	4.1422e-19	0.635114	0.595	0.389	6.10064e-15	0
Rhoq	5.45815e-19	0.662284	0.496	0.302	8.03876e-15	0
Naip2	9.7583e-19	0.770593	0.389	0.215	1.4372e-14	0
Zranb2	1.05745e-18	0.98142	0.311	0.155	1.55742e-14	0
Fnip2	1.1092e-18	0.836893	0.441	0.264	1.63363e-14	0
Tbc1d16	1.26253e-18	0.600588	0.603	0.397	1.85946e-14	0
Magi1	1.28341e-18	0.533665	0.752	0.563	1.8902e-14	0
Slc38a6	1.37485e-18	0.917235	0.327	0.168	2.02487e-14	0
Cotl1	1.92859e-18	0.827526	0.389	0.219	2.84043e-14	0
Ctsl	1.99181e-18	0.475305	0.644	0.43	2.93353e-14	0
Mitf	1.99561e-18	0.565229	0.721	0.527	2.93914e-14	0
Nlrp1b	3.26082e-18	0.631939	0.528	0.341	4.80254e-14	0
Cd33	3.59979e-18	0.448974	0.709	0.488	5.30177e-14	0
Mafb	3.83524e-18	0.605961	0.48	0.286	5.64854e-14	0
Eya4	3.9519e-18	0.869884	0.314	0.156	5.82036e-14	0
Slc1a3	4.10048e-18	0.621577	0.557	0.353	6.03918e-14	0
Vav1	4.45961e-18	0.673516	0.455	0.273	6.56811e-14	0
Naip5	4.84749e-18	0.695102	0.428	0.247	7.13938e-14	0
Fam114a2	4.95967e-18	0.888814	0.275	0.128	7.3046e-14	0
Irak2	5.51183e-18	0.521618	0.651	0.45	8.11783e-14	0
Tns1	6.74278e-18	0.832484	0.324	0.165	9.93077e-14	0
Snx24	8.01426e-18	0.551363	0.609	0.408	1.18034e-13	0
Pnisr	1.22339e-17	0.523468	0.644	0.44	1.80181e-13	0
Pafah1b1	1.38268e-17	0.579737	0.595	0.397	2.03641e-13	0
Prkch	1.60375e-17	0.911383	0.353	0.194	2.362e-13	0
Sfi1	1.74518e-17	0.617428	0.537	0.343	2.57031e-13	0
Mlph	1.84087e-17	0.74904	0.375	0.209	2.71123e-13	0
Nbea	1.90326e-17	0.723988	0.413	0.238	2.80313e-13	0
Clec4a3	2.03963e-17	0.932403	0.322	0.168	3.00396e-13	0
Lamp2	2.33535e-17	0.60367	0.536	0.343	3.4395e-13	0
Lyst	2.50447e-17	0.642971	0.485	0.294	3.68858e-13	0
Hipk2	2.95878e-17	0.683547	0.49	0.307	4.35769e-13	0
Ust	3.82233e-17	0.860726	0.357	0.2	5.62953e-13	0
Ipcef1	3.8643e-17	0.948085	0.29	0.145	5.69134e-13	0
Sgpl1	3.92944e-17	0.64552	0.413	0.235	5.78727e-13	0
Ppp1r21	4.18185e-17	0.538105	0.577	0.38	6.15902e-13	0
Arhgap17	4.26411e-17	0.484036	0.651	0.441	6.28017e-13	0
Actb	4.44858e-17	0.663754	0.434	0.256	6.55186e-13	0
Plekha1	4.62315e-17	0.991863	0.297	0.152	6.80898e-13	0
Aopep	4.63154e-17	0.787275	0.391	0.223	6.82133e-13	0
Trpm2	5.40482e-17	0.855449	0.314	0.163	7.96021e-13	0
Il10rb	7.37323e-17	0.845264	0.335	0.182	1.08593e-12	0
R3hdm1	8.04975e-17	0.7469	0.4	0.237	1.18557e-12	0
Taok3	1.06126e-16	0.522651	0.55	0.346	1.56303e-12	0
Atxn1	1.06594e-16	0.513728	0.639	0.433	1.56991e-12	0
Rnf180	1.4605e-16	0.524621	0.693	0.5	2.15102e-12	0
P2rx4	1.67939e-16	0.702076	0.402	0.235	2.47341e-12	0
9930111J21Rik2	1.76909e-16	0.769321	0.327	0.172	2.60552e-12	0
Fth1	1.83879e-16	0.739661	0.295	0.148	2.70817e-12	0
Pde1c	1.84675e-16	0.911534	0.295	0.151	2.71989e-12	0
Usp35	2.21815e-16	0.949841	0.268	0.13	3.26689e-12	0
Pts	2.90868e-16	0.681451	0.43	0.259	4.2839e-12	0
Dis3l2	3.04496e-16	0.656233	0.437	0.264	4.48462e-12	0
Zfr	3.09825e-16	0.525199	0.58	0.384	4.5631e-12	0
Asxl2	3.27857e-16	0.603436	0.518	0.337	4.82868e-12	0
Lrmda	3.3943e-16	0.305155	0.968	0.949	4.99913e-12	0
Spata13	3.54647e-16	0.80047	0.34	0.185	5.22323e-12	0
Rab27a	4.22062e-16	0.95678	0.292	0.152	6.21613e-12	0
Fcgr3	4.39954e-16	0.64208	0.419	0.249	6.47964e-12	0
Cpeb4	4.68336e-16	0.750485	0.335	0.179	6.89766e-12	0
Gm26917	4.957e-16	0.857953	0.301	0.156	7.30066e-12	0
Trf	5.23951e-16	0.700618	0.439	0.276	7.71675e-12	0
Ralgapa1	6.73791e-16	0.764985	0.373	0.216	9.9236e-12	0
Mertk	7.06488e-16	0.255008	0.991	0.972	1.04052e-11	0
Cadm1	7.40893e-16	0.533814	0.695	0.505	1.09119e-11	0
Usp8	9.92595e-16	0.594077	0.466	0.291	1.46189e-11	0
App	9.97257e-16	0.918474	0.275	0.139	1.46876e-11	0
Nuak1	1.26414e-15	0.629506	0.477	0.303	1.86183e-11	0
Arid4b	1.47385e-15	0.709575	0.405	0.244	2.17069e-11	0
Clint1	1.66144e-15	0.554122	0.493	0.31	2.44697e-11	0
Gm5086	1.73892e-15	0.510851	0.59	0.401	2.56108e-11	0
Ddx17	1.7557e-15	0.58496	0.564	0.39	2.5858e-11	0
Il1a	1.8308e-15	0.929557	0.259	0.127	2.6964e-11	0
Dpy19l4	1.83276e-15	0.592786	0.49	0.312	2.69929e-11	0
Gtf2i	1.97507e-15	0.597499	0.453	0.281	2.90888e-11	0
Tmcc1	2.0379e-15	0.502616	0.581	0.394	3.00141e-11	0
Gna12	2.32606e-15	0.446809	0.628	0.438	3.42582e-11	0
Atxn7l1	2.51049e-15	0.521254	0.561	0.372	3.69745e-11	0
Tmcc3	2.78096e-15	0.310861	0.964	0.944	4.09579e-11	0
Eri3	3.37374e-15	0.707739	0.388	0.23	4.96884e-11	0
Atg10	3.78541e-15	0.672931	0.408	0.243	5.57515e-11	0
Anxa3	4.05641e-15	0.516377	0.548	0.358	5.97428e-11	0
Cmss1	4.22752e-15	0.603261	0.426	0.262	6.22629e-11	0
Crebrf	4.68201e-15	0.557316	0.504	0.326	6.89567e-11	0
Itga6	5.43339e-15	0.491049	0.606	0.418	8.0023e-11	0
Igf1r	5.44143e-15	0.656881	0.458	0.288	8.01414e-11	0
Syk	5.46875e-15	0.505861	0.516	0.335	8.05437e-11	0
Vps54	5.72309e-15	0.531305	0.52	0.339	8.42896e-11	0
Xpr1	6.00294e-15	0.685596	0.388	0.23	8.84113e-11	0
Ctsh	6.26481e-15	0.445325	0.658	0.469	9.22682e-11	0
AU020206	6.33511e-15	0.584885	0.571	0.394	9.33035e-11	0
Tbxas1	6.60751e-15	0.432117	0.67	0.474	9.73155e-11	0
Stard9	7.10354e-15	0.449713	0.649	0.467	1.04621e-10	0
Csf2ra	7.58508e-15	0.670736	0.345	0.192	1.11713e-10	0
Peli2	7.6924e-15	0.595662	0.494	0.325	1.13294e-10	0
Gns	7.89746e-15	0.384881	0.731	0.533	1.16314e-10	0
Ncf1	8.21418e-15	0.551425	0.486	0.312	1.20978e-10	0
Slc25a36	1.10023e-14	0.611493	0.407	0.245	1.62041e-10	0
Rnpep	1.10138e-14	0.539631	0.471	0.298	1.62211e-10	0
Apc	1.29688e-14	0.591158	0.494	0.327	1.91005e-10	0
Dtnbp1	1.50773e-14	0.786143	0.281	0.146	2.22058e-10	0
Stx8	1.51743e-14	0.687817	0.394	0.239	2.23488e-10	0
Slc7a7	1.53899e-14	0.544417	0.491	0.317	2.26662e-10	0
Hps4	1.58877e-14	0.488367	0.504	0.326	2.33993e-10	0
Map4k3	1.72383e-14	0.538334	0.437	0.271	2.53886e-10	0
Slc29a3	1.8176e-14	0.546345	0.457	0.288	2.67696e-10	0
Fkbp15	2.0737e-14	0.520241	0.488	0.312	3.05415e-10	0
Il1rl2	2.10109e-14	0.815093	0.268	0.137	3.09448e-10	0
Chd7	2.12546e-14	0.410601	0.615	0.42	3.13038e-10	0
Plekhm3	2.15186e-14	0.49474	0.466	0.29	3.16927e-10	0
Capzb	2.17608e-14	0.583862	0.43	0.262	3.20493e-10	0
Ccr5	2.18256e-14	0.429381	0.636	0.445	3.21447e-10	0
Kidins220	2.27719e-14	0.730898	0.37	0.222	3.35385e-10	0
Rps6kc1	2.3669e-14	0.614089	0.34	0.189	3.48597e-10	0
Igsf6	2.83917e-14	0.854883	0.257	0.129	4.18152e-10	0
Stx7	2.89368e-14	0.567939	0.451	0.285	4.26182e-10	0
Ccnd3	3.09203e-14	0.320554	0.934	0.857	4.55394e-10	0
Tnrc6a	3.34046e-14	0.552127	0.475	0.309	4.91983e-10	0
Rassf3	3.419e-14	0.713455	0.34	0.194	5.03551e-10	0
Klhl24	3.44099e-14	0.606078	0.383	0.225	5.0679e-10	0
Gm43821	3.47261e-14	0.971436	0.258	0.134	5.11446e-10	0
Il17ra	3.53499e-14	0.792947	0.323	0.183	5.20634e-10	0
Tln2	3.67577e-14	0.701888	0.329	0.184	5.41367e-10	0
Bcl2l1	3.68055e-14	0.840003	0.299	0.166	5.42071e-10	0
Extl3	3.77607e-14	0.413068	0.666	0.477	5.5614e-10	0
Fnip1	3.80592e-14	0.473705	0.629	0.454	5.60536e-10	0
Abr	3.83034e-14	0.519438	0.509	0.333	5.64133e-10	0
Fer	4.10931e-14	0.472406	0.506	0.329	6.05219e-10	0
Spag9	4.93164e-14	0.554895	0.491	0.326	7.26332e-10	0
Lrrc8d	5.04622e-14	0.630648	0.376	0.221	7.43207e-10	0
Efhd2	5.47833e-14	0.738224	0.284	0.15	8.06849e-10	0
Bach2	6.34083e-14	0.434234	0.614	0.416	9.33878e-10	0
Gpatch8	6.82181e-14	0.557051	0.483	0.319	1.00472e-09	0
Ypel2	8.40228e-14	0.877643	0.252	0.129	1.23749e-09	0
Vps13d	8.43182e-14	0.628926	0.369	0.219	1.24184e-09	0
Tnks2	8.64645e-14	0.581709	0.381	0.225	1.27345e-09	0
Dennd4a	8.78503e-14	0.333014	0.931	0.873	1.29386e-09	0
Tmem87b	9.25996e-14	0.737199	0.324	0.185	1.36381e-09	0
Rab11fip5	9.67653e-14	0.845441	0.257	0.131	1.42516e-09	0
Gpr137b	1.02033e-13	0.695921	0.312	0.173	1.50274e-09	0
Kdm7a	1.03901e-13	0.490034	0.489	0.317	1.53025e-09	0
Sirpa	1.05452e-13	0.352646	0.837	0.678	1.5531e-09	0
Golgb1	1.06477e-13	0.776394	0.312	0.177	1.56819e-09	0
Hmbox1	1.07027e-13	0.64313	0.389	0.238	1.57629e-09	0
Scarb2	1.09646e-13	0.516653	0.482	0.315	1.61486e-09	0
Wwp2	1.12913e-13	0.73615	0.29	0.156	1.66298e-09	0
Fbxl17	1.17066e-13	0.381747	0.735	0.567	1.72415e-09	0
Ptpro	1.21298e-13	0.61161	0.388	0.236	1.78648e-09	0
Pfkfb3	1.22269e-13	0.706231	0.351	0.207	1.80077e-09	0
Ube2h	1.24338e-13	0.489976	0.571	0.391	1.83125e-09	0
Pik3cb	1.35432e-13	0.601486	0.37	0.22	1.99464e-09	0
Polb	1.39132e-13	0.832275	0.259	0.134	2.04914e-09	0
Pbx1	1.41472e-13	0.852372	0.287	0.158	2.0836e-09	0
Aff1	1.47262e-13	0.56717	0.432	0.276	2.16887e-09	0
Lgals9	1.51384e-13	0.655229	0.38	0.232	2.22958e-09	0
Akap9	1.55831e-13	0.791457	0.316	0.181	2.29508e-09	0
Tmem104	1.57954e-13	0.600195	0.357	0.206	2.32635e-09	0
Susd6	1.6094e-13	0.517775	0.447	0.279	2.37033e-09	0
Synj1	1.63528e-13	0.459757	0.507	0.333	2.40844e-09	0
Npnt	1.73256e-13	0.829738	0.278	0.15	2.55171e-09	0
Xrcc4	1.75988e-13	0.712355	0.337	0.197	2.59195e-09	0
Clasp2	2.0288e-13	0.466122	0.645	0.494	2.98802e-09	0
Sft2d1	2.04408e-13	0.41503	0.568	0.381	3.01053e-09	0
Man1c1	2.20783e-13	0.504056	0.57	0.401	3.25168e-09	0
Lrrfip1	2.20939e-13	0.641716	0.372	0.226	3.25399e-09	0
Rfx3	2.31313e-13	0.790683	0.355	0.218	3.40678e-09	0
Lhfpl2	2.57206e-13	0.428471	0.671	0.505	3.78813e-09	0
Trim2	2.58039e-13	0.755292	0.276	0.149	3.80039e-09	0
Ncf2	2.71481e-13	0.529781	0.418	0.256	3.99837e-09	0
Cd86	2.75557e-13	0.418701	0.656	0.465	4.0584e-09	0
Cd300a	2.86147e-13	0.676088	0.323	0.185	4.21437e-09	0
Fars2	2.95491e-13	0.545664	0.464	0.302	4.35199e-09	0
Comt	3.12195e-13	0.385739	0.563	0.378	4.598e-09	0
Msi2	3.15105e-13	0.605698	0.425	0.279	4.64086e-09	0
Gm35154	3.27598e-13	0.709523	0.399	0.257	4.82486e-09	0
Eps15	3.34067e-13	0.692282	0.343	0.204	4.92013e-09	0
Spire1	3.52326e-13	0.473139	0.539	0.369	5.18906e-09	0
Itpr2	3.67924e-13	0.416752	0.709	0.531	5.41878e-09	0
Tnpo1	3.84445e-13	0.561295	0.436	0.278	5.6621e-09	0
Soat1	4.21737e-13	0.732059	0.283	0.154	6.21134e-09	0
Pld4	4.25115e-13	0.372306	0.674	0.485	6.26109e-09	0
Gm2629	4.35895e-13	0.302674	0.886	0.782	6.41986e-09	0
Tet2	4.36059e-13	0.521166	0.414	0.255	6.42227e-09	0
Ranbp10	4.3872e-13	0.592148	0.372	0.224	6.46146e-09	0
Ppard	4.88389e-13	0.698348	0.313	0.179	7.19299e-09	0
Rps6ka3	4.89786e-13	0.517362	0.486	0.328	7.21357e-09	0
Shisa3	4.90168e-13	0.475955	0.445	0.279	7.2192e-09	0
Ogt	4.94481e-13	0.508017	0.48	0.315	7.28272e-09	0
P3h2	5.45212e-13	0.393539	0.802	0.652	8.02988e-09	0
Map2k5	5.59999e-13	0.541479	0.431	0.273	8.24766e-09	0
Pou2f2	5.60519e-13	0.394022	0.686	0.495	8.25532e-09	0
Tbc1d22a	5.83568e-13	0.442195	0.595	0.416	8.5948e-09	0
Znfx1	5.8445e-13	0.574359	0.28	0.15	8.60779e-09	0
Ulk2	6.13268e-13	0.381181	0.733	0.548	9.03221e-09	0
Wdr7	6.42904e-13	0.758944	0.311	0.179	9.4687e-09	0
Hdac8	6.53852e-13	0.572391	0.425	0.271	9.62994e-09	0
Marcks	6.65925e-13	0.370152	0.579	0.385	9.80775e-09	0
Sat1	6.6667e-13	0.339767	0.714	0.526	9.81872e-09	0
2010315B03Rik	7.09595e-13	0.768737	0.291	0.163	1.04509e-08	0
Senp7	7.35287e-13	0.61263	0.371	0.225	1.08293e-08	0
Tcf25	8.0746e-13	0.503392	0.494	0.329	1.18923e-08	0
Epsti1	8.3595e-13	0.30427	0.557	0.373	1.23119e-08	0
Tnfrsf11a	8.83658e-13	0.456419	0.436	0.274	1.30145e-08	0
Ophn1	8.9265e-13	0.273376	0.948	0.9	1.3147e-08	0
Fryl	9.44789e-13	0.626112	0.392	0.247	1.39149e-08	0
Naip6	9.67058e-13	0.624886	0.334	0.196	1.42428e-08	0
Btaf1	9.78311e-13	0.522289	0.49	0.333	1.44086e-08	0
St3gal4	9.97523e-13	0.839269	0.256	0.137	1.46915e-08	0
Tep1	1.03398e-12	0.779775	0.263	0.141	1.52285e-08	0
Senp2	1.06638e-12	0.415022	0.541	0.361	1.57057e-08	0
Tnfrsf1b	1.14746e-12	0.634637	0.312	0.178	1.68997e-08	0
Ehd4	1.15412e-12	0.509643	0.356	0.209	1.69979e-08	0
Cux1	1.20233e-12	0.386653	0.731	0.556	1.7708e-08	0
H2-D1	1.28289e-12	0.414037	0.453	0.29	1.88943e-08	0
St6gal1	1.34472e-12	0.59631	0.389	0.24	1.9805e-08	0
N4bp2l1	1.41528e-12	0.562419	0.36	0.215	2.08443e-08	0
Pros1	1.43596e-12	0.432012	0.571	0.407	2.11488e-08	0
Gnas	1.49534e-12	0.655279	0.285	0.156	2.20233e-08	0
Fcgr2b	1.56502e-12	0.66262	0.33	0.196	2.30496e-08	0
Tgfa	1.71818e-12	0.662391	0.318	0.185	2.53053e-08	0
5031425E22Rik	1.71903e-12	0.665606	0.335	0.2	2.53178e-08	0
Kmt2a	1.72735e-12	0.696882	0.335	0.202	2.54405e-08	0
Rab3gap1	1.74286e-12	0.543859	0.418	0.265	2.56689e-08	0
Lcp1	1.75707e-12	0.572544	0.434	0.283	2.58782e-08	0
Add1	1.81189e-12	0.908053	0.256	0.139	2.66856e-08	0
Rap1b	1.91511e-12	0.438101	0.434	0.273	2.82057e-08	0
Dpysl2	1.93664e-12	0.840668	0.278	0.157	2.85229e-08	0
Pitpnc1	2.0757e-12	0.422614	0.794	0.645	3.05709e-08	0
Liph	2.1294e-12	0.799111	0.254	0.137	3.13618e-08	0
Myo9b	2.47497e-12	0.498816	0.413	0.259	3.64514e-08	0
Ptprc	2.47853e-12	0.277804	0.908	0.791	3.65038e-08	0
Kdm6a	2.58735e-12	0.651177	0.338	0.201	3.81065e-08	0
Dmxl1	2.73325e-12	0.491222	0.447	0.291	4.02553e-08	0
Ndfip1	2.82355e-12	0.586764	0.36	0.219	4.15853e-08	0
Rabgap1	2.95906e-12	0.449801	0.477	0.314	4.3581e-08	0
Oxct1	2.96531e-12	0.524971	0.493	0.337	4.36731e-08	0
Phkb	3.05378e-12	0.450864	0.486	0.324	4.49761e-08	0
Mysm1	3.24332e-12	0.630491	0.348	0.209	4.77676e-08	0
Phf21a	3.29636e-12	0.41045	0.69	0.512	4.85488e-08	0
Cd300c2	3.34456e-12	0.352499	0.549	0.362	4.92587e-08	0
Wls	3.45389e-12	0.460848	0.429	0.27	5.08689e-08	0
Actr3	3.46109e-12	0.459984	0.44	0.282	5.09749e-08	0
Traf3ip3	3.49868e-12	0.588204	0.299	0.167	5.15285e-08	0
Acss1	3.69887e-12	0.603335	0.386	0.243	5.44769e-08	0
Slc11a1	3.74039e-12	0.534045	0.399	0.25	5.50885e-08	0
Ptk2b	4.21638e-12	0.429621	0.483	0.32	6.20988e-08	0
Lrig2	4.28595e-12	0.874967	0.253	0.139	6.31235e-08	0
Slc36a1	4.4394e-12	0.502561	0.42	0.27	6.53835e-08	0
Abcc3	4.62419e-12	0.621307	0.37	0.229	6.8105e-08	0
Sdccag8	4.63012e-12	0.459647	0.536	0.375	6.81925e-08	0
Camk1	5.09037e-12	0.428237	0.49	0.326	7.49709e-08	0
Ypel3	5.23899e-12	0.490793	0.373	0.228	7.71598e-08	0
Wipf1	5.24694e-12	0.4131	0.633	0.471	7.72769e-08	0
Galk2	5.61932e-12	0.731262	0.273	0.153	8.27614e-08	0
Fbxl20	5.69193e-12	0.405964	0.512	0.344	8.38307e-08	0
Snx5	5.71941e-12	0.378838	0.538	0.36	8.42355e-08	0
H2-K1	5.87703e-12	0.414791	0.437	0.277	8.65569e-08	0
Csad	5.87766e-12	0.551808	0.403	0.254	8.65662e-08	0
Ifngr2	6.01413e-12	0.482966	0.452	0.298	8.85762e-08	0
Ttc17	6.15495e-12	0.556992	0.371	0.226	9.06501e-08	0
Zfp740	6.38651e-12	0.665733	0.294	0.168	9.40606e-08	0
Cyp27a1	7.07016e-12	0.568597	0.296	0.167	1.04129e-07	0
Usp12	7.09908e-12	0.597304	0.392	0.251	1.04555e-07	0
Asph	7.47232e-12	0.394534	0.572	0.397	1.10052e-07	0
Chfr	7.4833e-12	0.665397	0.313	0.183	1.10214e-07	0
Acap2	7.48998e-12	0.323839	0.682	0.495	1.10312e-07	0
Baz2b	7.55921e-12	0.419673	0.639	0.468	1.11332e-07	0
Fgfr2	7.7532e-12	0.333541	0.693	0.515	1.14189e-07	0
Slc6a6	7.78383e-12	0.571091	0.409	0.265	1.1464e-07	0
Tnfrsf21	7.80391e-12	0.716137	0.326	0.197	1.14936e-07	0
Slc43a2	8.00309e-12	0.515694	0.434	0.282	1.1787e-07	0
Rp2	8.21376e-12	0.512685	0.42	0.271	1.20972e-07	0
Stx16	8.44419e-12	0.48918	0.457	0.303	1.24366e-07	0
Trip12	8.72686e-12	0.410087	0.597	0.424	1.28529e-07	0
Tns3	9.07739e-12	0.389725	0.686	0.52	1.33692e-07	0
Daglb	9.64542e-12	0.416305	0.511	0.345	1.42058e-07	0
Tango2	9.92253e-12	0.718526	0.296	0.172	1.46139e-07	0
Paip2	9.94024e-12	0.752983	0.302	0.18	1.464e-07	0
Tbc1d9	1.00514e-11	0.359202	0.657	0.47	1.48038e-07	0
Smarca2	1.04988e-11	0.442123	0.515	0.351	1.54627e-07	0
Rb1cc1	1.07046e-11	0.458554	0.468	0.313	1.57657e-07	0
Mpeg1	1.07313e-11	0.603012	0.344	0.21	1.58051e-07	0
Nktr	1.12154e-11	0.469652	0.478	0.323	1.6518e-07	0
Bin1	1.14923e-11	0.344491	0.8	0.652	1.69258e-07	0
Trappc8	1.19553e-11	0.489314	0.398	0.253	1.76078e-07	0
Dock2	1.26514e-11	0.292412	0.916	0.842	1.8633e-07	0
Appl2	1.27664e-11	0.672621	0.335	0.206	1.88024e-07	0
Gak	1.3081e-11	0.669616	0.305	0.179	1.92656e-07	0
Sh3pxd2a	1.31029e-11	0.481679	0.44	0.291	1.92979e-07	0
Rgs10	1.34031e-11	0.385855	0.611	0.438	1.974e-07	0
Gm2245	1.35602e-11	0.340897	0.757	0.586	1.99715e-07	0
Mms19	1.38478e-11	0.545139	0.316	0.184	2.0395e-07	0
Utrn	1.44975e-11	0.791457	0.263	0.148	2.13519e-07	0
Sh3kbp1	1.50463e-11	0.365789	0.749	0.603	2.21603e-07	0
Hbp1	1.51308e-11	0.736383	0.264	0.148	2.22847e-07	0
Tjp1	1.51571e-11	0.472854	0.488	0.334	2.23234e-07	0
Cpeb2	1.55595e-11	0.75824	0.286	0.167	2.29161e-07	0
Papola	1.56652e-11	0.4086	0.498	0.336	2.30717e-07	0
Zzz3	1.61726e-11	0.675738	0.303	0.179	2.38189e-07	0
Ip6k1	1.62714e-11	0.534109	0.451	0.303	2.39646e-07	0
Ddi2	1.6382e-11	0.497944	0.404	0.259	2.41274e-07	0
Tnrc6b	1.65581e-11	0.352416	0.717	0.533	2.43867e-07	0
Usp48	1.66537e-11	0.596507	0.299	0.172	2.45276e-07	0
Foxo3	1.69035e-11	0.550815	0.383	0.243	2.48955e-07	0
Adcy7	1.73578e-11	0.595	0.31	0.18	2.55646e-07	0
Ecpas	1.75959e-11	0.537311	0.391	0.249	2.59153e-07	0
Snx13	1.85213e-11	0.438904	0.521	0.363	2.72782e-07	0
Gcnt1	1.90727e-11	0.719676	0.31	0.187	2.80903e-07	0
Gna15	1.92e-11	0.465187	0.496	0.341	2.82777e-07	0
Wdfy1	1.96435e-11	0.6791	0.285	0.165	2.8931e-07	0
Tpm3	1.97489e-11	0.47736	0.51	0.354	2.90861e-07	0
Kif13a	1.9778e-11	0.61286	0.342	0.211	2.91291e-07	0
Hnrnpu	2.21985e-11	0.509146	0.4	0.259	3.2694e-07	0
Cerk	2.41022e-11	0.394682	0.618	0.457	3.54978e-07	0
Hpgds	2.4691e-11	0.274739	0.878	0.76	3.63649e-07	0
Ifi30	2.5072e-11	0.588964	0.295	0.17	3.6926e-07	0
Gpcpd1	2.56294e-11	0.536747	0.375	0.237	3.7747e-07	0
Pde4dip	2.7733e-11	0.696735	0.305	0.183	4.08452e-07	0
Mapre2	2.90995e-11	0.722771	0.281	0.163	4.28578e-07	0
Zbtb20	3.0951e-11	0.34144	0.828	0.721	4.55846e-07	0
Kpna4	3.15503e-11	0.46922	0.443	0.297	4.64673e-07	0
Strbp	3.16642e-11	0.502597	0.495	0.345	4.6635e-07	0
Fat3	3.20172e-11	0.585586	0.499	0.356	4.7155e-07	0
Elk3	3.29087e-11	0.489736	0.482	0.331	4.8468e-07	0
Plxdc1	3.33251e-11	0.550187	0.366	0.229	4.90812e-07	0
Clk1	3.47669e-11	0.394138	0.586	0.42	5.12046e-07	0
Phc2	3.54327e-11	0.487052	0.482	0.334	5.21852e-07	0
Rnf130	3.58323e-11	0.494928	0.439	0.294	5.27738e-07	0
Rffl	3.59523e-11	0.526335	0.45	0.303	5.29505e-07	0
Osbpl11	3.60407e-11	0.350307	0.568	0.397	5.30807e-07	0
Btrc	3.62047e-11	0.768737	0.284	0.167	5.33223e-07	0
Itgam	3.68104e-11	0.352121	0.74	0.576	5.42144e-07	0
Jak1	3.80015e-11	0.416596	0.525	0.365	5.59686e-07	0
Erbin	3.80682e-11	0.419739	0.593	0.429	5.60669e-07	0
Cdh11	3.91752e-11	0.411695	0.63	0.472	5.76973e-07	0
Gm47754	4.58632e-11	0.68026	0.258	0.144	6.75473e-07	0
Pik3r6	4.58849e-11	0.612618	0.26	0.145	6.75793e-07	0
Ripk2	4.89759e-11	0.750566	0.279	0.162	7.21316e-07	0
Rab10	4.93583e-11	0.498578	0.44	0.297	7.26949e-07	0
Atp6v1c1	5.04897e-11	0.626963	0.29	0.17	7.43612e-07	0
Mga	5.11343e-11	0.585308	0.314	0.188	7.53106e-07	0
Arhgef12	5.49923e-11	0.655843	0.295	0.175	8.09926e-07	0
Gm17106	5.61662e-11	0.417858	0.463	0.31	8.27215e-07	0
Pon3	5.79558e-11	0.650509	0.265	0.151	8.53573e-07	0
Zfp608	5.85984e-11	0.494452	0.415	0.268	8.63038e-07	0
Parp8	5.87615e-11	0.362064	0.67	0.497	8.65439e-07	0
Eef2k	5.89683e-11	0.373577	0.541	0.38	8.68485e-07	0
Clcn3	6.05866e-11	0.734824	0.26	0.148	8.9232e-07	0
Ccnt2	6.68917e-11	0.431397	0.414	0.268	9.85181e-07	0
Dclre1c	6.74933e-11	0.493276	0.385	0.246	9.94042e-07	0
Tmem131	6.96042e-11	0.540649	0.332	0.203	1.02513e-06	0
Zfp407	7.13087e-11	0.523261	0.45	0.308	1.05024e-06	0
Atp6v1b2	7.25297e-11	0.584592	0.275	0.158	1.06822e-06	0
Clip1	7.29014e-11	0.52732	0.338	0.208	1.07369e-06	0
Snx29	7.43161e-11	0.269188	0.926	0.844	1.09453e-06	0
B2m	7.69794e-11	0.374691	0.474	0.317	1.13375e-06	0
Slc46a3	8.00326e-11	0.708517	0.268	0.155	1.17872e-06	0
Bri3	8.14679e-11	0.569913	0.327	0.2	1.19986e-06	0
Spsb1	8.27517e-11	0.625962	0.302	0.18	1.21877e-06	0
Plgrkt	8.28019e-11	0.475572	0.467	0.322	1.21951e-06	0
Tbck	8.29174e-11	0.416146	0.409	0.261	1.22121e-06	0
Klhl6	8.45818e-11	0.570674	0.297	0.176	1.24572e-06	0
Insr	8.88196e-11	0.481832	0.447	0.303	1.30813e-06	0
Rptor	8.96136e-11	0.286278	0.72	0.536	1.31983e-06	0
Gab2	9.19418e-11	0.263811	0.959	0.927	1.35412e-06	0
Dgkd	9.42452e-11	0.358069	0.555	0.386	1.38804e-06	0
Abcc5	9.57845e-11	0.439655	0.362	0.225	1.41071e-06	0
N4bp2l2	9.64929e-11	0.505619	0.36	0.226	1.42115e-06	0
Ccdc93	9.6954e-11	0.551738	0.335	0.208	1.42794e-06	0
Itgb2	9.94496e-11	0.704607	0.253	0.143	1.46469e-06	0
Ctps2	1.01765e-10	0.672337	0.286	0.169	1.49879e-06	0
Sp3	1.02143e-10	0.551643	0.34	0.212	1.50437e-06	0
Abcd2	1.05809e-10	0.607425	0.351	0.223	1.55836e-06	0
Cd180	1.10065e-10	0.495947	0.485	0.339	1.62104e-06	0
Znrf2	1.13126e-10	0.487226	0.453	0.309	1.66612e-06	0
Ythdf3	1.13284e-10	0.417919	0.483	0.333	1.66845e-06	0
Tra2a	1.13796e-10	0.358566	0.571	0.406	1.67599e-06	0
Map3k7	1.13824e-10	0.778663	0.252	0.144	1.67639e-06	0
Ncoa2	1.14126e-10	0.424881	0.543	0.387	1.68085e-06	0
Fmn1	1.19388e-10	0.769986	0.26	0.151	1.75835e-06	0
Srsf11	1.21193e-10	0.385491	0.514	0.361	1.78494e-06	0
Uty	1.21622e-10	0.516174	0.467	0.327	1.79126e-06	0
Tet3	1.26694e-10	0.428751	0.463	0.315	1.86596e-06	0
Gsap	1.29647e-10	0.448905	0.477	0.331	1.90944e-06	0
4931422A03Rik	1.32615e-10	0.659289	0.264	0.151	1.95315e-06	0
Nufip2	1.33903e-10	0.446809	0.419	0.276	1.97212e-06	0
Ptp4a2	1.34593e-10	0.429875	0.491	0.345	1.98229e-06	0
Galnt7	1.3545e-10	0.625485	0.317	0.195	1.9949e-06	0
Vti1a	1.4694e-10	0.396768	0.585	0.425	2.16413e-06	0
Pibf1	1.47436e-10	0.468342	0.389	0.251	2.17144e-06	0
Gnb1	1.47745e-10	0.475509	0.431	0.287	2.17599e-06	0
Prkcb	1.48641e-10	0.341671	0.769	0.611	2.18919e-06	0
Tgs1	1.55609e-10	0.540676	0.359	0.228	2.29181e-06	0
Itsn2	1.58228e-10	0.433753	0.493	0.346	2.33038e-06	0
Snx30	1.66579e-10	0.526634	0.38	0.248	2.45337e-06	0
Pias2	1.67903e-10	0.486702	0.432	0.291	2.47287e-06	0
Npepps	1.71104e-10	0.613172	0.351	0.225	2.52002e-06	0
Zfp609	1.71533e-10	0.655791	0.338	0.216	2.52634e-06	0
Cept1	1.72319e-10	0.423571	0.518	0.365	2.53792e-06	0
Slc30a7	1.77429e-10	0.666139	0.267	0.155	2.61317e-06	0
Rab40c	1.79654e-10	0.681587	0.284	0.17	2.64594e-06	0
Clta	1.81738e-10	0.404103	0.445	0.293	2.67663e-06	0
Zfp90	1.8938e-10	0.498675	0.335	0.206	2.78919e-06	0
Rftn1	1.90179e-10	0.486735	0.38	0.244	2.80095e-06	0
Gm12353	1.91034e-10	0.47923	0.381	0.248	2.81355e-06	0
Fgd2	1.95462e-10	0.286488	0.829	0.68	2.87876e-06	0
Zfc3h1	1.99062e-10	0.481082	0.413	0.276	2.93179e-06	0
Tyk2	2.00776e-10	0.533961	0.286	0.168	2.95703e-06	0
Ralgapb	2.0783e-10	0.752796	0.273	0.163	3.06092e-06	0
Adcy9	2.08491e-10	0.53301	0.333	0.206	3.07065e-06	0
Mvb12b	2.13505e-10	0.40396	0.525	0.371	3.1445e-06	0
Heatr5a	2.14884e-10	0.284198	0.625	0.446	3.16481e-06	0
Kat6b	2.15184e-10	0.596564	0.281	0.166	3.16923e-06	0
Cflar	2.33184e-10	0.353602	0.66	0.495	3.43434e-06	0
Mtmr3	2.62192e-10	0.355026	0.571	0.399	3.86157e-06	0
Ppt1	2.81623e-10	0.628028	0.328	0.208	4.14775e-06	0
Mtmr6	2.88736e-10	0.535565	0.321	0.197	4.2525e-06	0
Hnrnpc	3.01832e-10	0.464017	0.426	0.29	4.44538e-06	0
Pak1	3.03114e-10	0.757024	0.27	0.162	4.46426e-06	0
Atad2b	3.07021e-10	0.381127	0.531	0.367	4.52181e-06	0
Cacul1	3.14308e-10	0.644908	0.273	0.161	4.62913e-06	0
Klf12	3.21534e-10	0.399637	0.625	0.473	4.73555e-06	0
Sdcbp	3.23362e-10	0.484008	0.378	0.247	4.76248e-06	0
Ubl3	3.24793e-10	0.441063	0.397	0.262	4.78355e-06	0
Snx6	3.25503e-10	0.453627	0.399	0.261	4.79402e-06	0
Dglucy	3.26868e-10	0.567209	0.296	0.177	4.81411e-06	0
Ssbp1	3.28332e-10	0.615292	0.252	0.144	4.83568e-06	0
Grn	3.3593e-10	0.33848	0.55	0.39	4.94758e-06	0
Ppp1r9a	3.36947e-10	0.292043	0.771	0.627	4.96256e-06	0
Tent2	3.46501e-10	0.363196	0.498	0.343	5.10327e-06	0
Cmip	3.54921e-10	0.357659	0.591	0.43	5.22728e-06	0
Akap8l	3.57587e-10	0.334378	0.591	0.43	5.26653e-06	0
Zfand3	3.85085e-10	0.292497	0.71	0.522	5.67153e-06	0
Arid1b	4.0216e-10	0.375798	0.601	0.435	5.92301e-06	0
Smad2	4.11642e-10	0.578563	0.291	0.174	6.06267e-06	0
Abcg2	4.12768e-10	0.651573	0.267	0.158	6.07924e-06	0
Sla	4.18421e-10	0.494531	0.353	0.224	6.1625e-06	0
Mylip	4.3016e-10	0.334886	0.579	0.406	6.33539e-06	0
Fermt3	4.50001e-10	0.357363	0.577	0.416	6.62761e-06	0
Oprm1	4.53154e-10	0.553297	0.302	0.184	6.67405e-06	0
Prex1	4.8615e-10	0.362125	0.577	0.422	7.16002e-06	0
Oga	5.07002e-10	0.42697	0.436	0.295	7.46713e-06	0
Gpbp1l1	5.07542e-10	0.539425	0.319	0.197	7.47508e-06	0
Retreg1	6.36556e-10	0.367176	0.557	0.406	9.3752e-06	0
Pik3ap1	6.44518e-10	0.257091	0.678	0.524	9.49246e-06	0
Trio	6.4966e-10	0.392178	0.51	0.356	9.56819e-06	0
F11r	6.6873e-10	0.364843	0.553	0.394	9.84906e-06	0
Sort1	6.69564e-10	0.570101	0.36	0.236	9.86133e-06	0
Atp6v0a1	6.71954e-10	0.364141	0.518	0.364	9.89654e-06	0
Slfn8	6.89603e-10	0.598216	0.265	0.157	1.01565e-05	0
Ccnl1	6.90277e-10	0.372623	0.472	0.322	1.01664e-05	0
Ubxn4	7.21638e-10	0.61933	0.302	0.187	1.06283e-05	0
Apobec3	7.31547e-10	0.351007	0.507	0.355	1.07742e-05	0
Avl9	7.45772e-10	0.592927	0.295	0.18	1.09837e-05	0
Chic2	7.54852e-10	0.624857	0.333	0.216	1.11175e-05	0
Notch2	7.83598e-10	0.401014	0.464	0.321	1.15408e-05	0
Elmsan1	7.96311e-10	0.578236	0.281	0.168	1.17281e-05	0
Ppp4r3b	8.23328e-10	0.525475	0.339	0.215	1.2126e-05	0
Gfm2	8.42828e-10	0.319479	0.542	0.384	1.24132e-05	0
Phf3	8.93945e-10	0.514478	0.343	0.219	1.3166e-05	0
Itgb5	9.07222e-10	0.280816	0.878	0.768	1.33616e-05	0
Ccni	9.3936e-10	0.435313	0.361	0.233	1.38349e-05	0
Fam91a1	9.64402e-10	0.425329	0.412	0.274	1.42037e-05	0
Gusb	9.67468e-10	0.517892	0.36	0.235	1.42489e-05	0
Fam219a	9.72356e-10	0.679347	0.252	0.148	1.43209e-05	0
Ralgps1	9.89989e-10	0.665926	0.286	0.176	1.45806e-05	0
Ogdh	1.0082e-09	0.485385	0.319	0.198	1.48487e-05	0
Rab43	1.01032e-09	0.470396	0.332	0.21	1.48799e-05	0
Stxbp5	1.01728e-09	0.477982	0.394	0.263	1.49825e-05	0
Arhgef6	1.02326e-09	0.427128	0.393	0.259	1.50706e-05	0
Csnk1g1	1.04689e-09	0.511579	0.356	0.233	1.54186e-05	0
Gm37494	1.06525e-09	0.493843	0.36	0.233	1.5689e-05	0
Atp2c1	1.0694e-09	0.357804	0.533	0.377	1.57501e-05	0
Lst1	1.095e-09	0.593407	0.28	0.17	1.61271e-05	0
Ifnar2	1.10933e-09	0.458554	0.452	0.318	1.63382e-05	0
Mtr	1.11921e-09	0.518288	0.335	0.213	1.64838e-05	0
Cltc	1.13322e-09	0.334524	0.584	0.43	1.66901e-05	0
Clock	1.14828e-09	0.527771	0.324	0.204	1.69119e-05	0
Exoc6	1.16721e-09	0.436402	0.41	0.276	1.71907e-05	0
Ube3a	1.19186e-09	0.430648	0.463	0.322	1.75537e-05	0
Atp9b	1.20116e-09	0.411113	0.455	0.309	1.76907e-05	0
A630001G21Rik	1.21166e-09	0.34366	0.49	0.341	1.78454e-05	0
Mon2	1.25036e-09	0.413597	0.464	0.326	1.84154e-05	0
Il6st	1.26589e-09	0.49825	0.342	0.218	1.86441e-05	0
Cd53	1.26845e-09	0.463882	0.337	0.213	1.86817e-05	0
Chd2	1.29283e-09	0.31878	0.638	0.476	1.90408e-05	0
Pkig	1.30252e-09	0.325013	0.538	0.386	1.91835e-05	0
Mindy2	1.31549e-09	0.482513	0.318	0.198	1.93745e-05	0
Acox3	1.31873e-09	0.59136	0.265	0.156	1.94223e-05	0
Pid1	1.35302e-09	0.296236	0.785	0.676	1.99273e-05	0
Mier1	1.39115e-09	0.443312	0.398	0.266	2.04888e-05	0
Kdm4c	1.4139e-09	0.45712	0.35	0.223	2.08239e-05	0
Faf1	1.42884e-09	0.520995	0.388	0.262	2.10439e-05	0
Hnrnpl	1.47583e-09	0.634808	0.271	0.164	2.17361e-05	0
Kdm5a	1.49092e-09	0.495863	0.35	0.226	2.19583e-05	0
Nckap1l	1.58367e-09	0.316019	0.629	0.467	2.33243e-05	0
Pik3ca	1.5851e-09	0.426643	0.356	0.227	2.33453e-05	0
Pdxdc1	1.65013e-09	0.630176	0.29	0.18	2.43031e-05	0
E230029C05Rik	1.65299e-09	0.29675	0.892	0.785	2.43452e-05	0
Tnks	1.66071e-09	0.41718	0.354	0.228	2.44589e-05	0
Rtn4	1.66843e-09	0.341773	0.581	0.43	2.45726e-05	0
N4bp1	1.68931e-09	0.641593	0.276	0.169	2.48802e-05	0
Skil	1.84965e-09	0.441009	0.474	0.338	2.72417e-05	0
4930517O19Rik	1.87356e-09	0.406993	0.394	0.263	2.75937e-05	0
Erp29	1.88546e-09	0.386776	0.446	0.305	2.77691e-05	0
Rassf2	1.90022e-09	0.394483	0.464	0.329	2.79864e-05	0
Osbpl9	1.90357e-09	0.36555	0.483	0.343	2.80358e-05	0
Asah1	1.90854e-09	0.40562	0.485	0.346	2.81089e-05	0
Aagab	1.93267e-09	0.555223	0.324	0.208	2.84644e-05	0
Trim30d	1.96677e-09	0.44877	0.34	0.219	2.89665e-05	0
Ep300	1.98642e-09	0.333502	0.511	0.363	2.9256e-05	0
Tgfbr2	2.02249e-09	0.311518	0.654	0.495	2.97872e-05	0
Fbxo11	2.05255e-09	0.326308	0.52	0.372	3.023e-05	0
P2ry6	2.1183e-09	0.354258	0.525	0.379	3.11983e-05	0
Zfp950	2.17692e-09	0.416969	0.408	0.277	3.20617e-05	0
Npc2	2.3008e-09	0.410655	0.382	0.251	3.38862e-05	0
Acbd5	2.34097e-09	0.679969	0.26	0.157	3.44777e-05	0
Washc4	2.65023e-09	0.419043	0.432	0.297	3.90326e-05	0
Nt5c2	2.68008e-09	0.526211	0.329	0.211	3.94722e-05	0
Yes1	2.69085e-09	0.540907	0.316	0.201	3.96308e-05	0
Mgll	2.72021e-09	0.463882	0.292	0.177	4.00633e-05	0
Bbx	2.86886e-09	0.552777	0.267	0.16	4.22526e-05	0
Huwe1	2.90242e-09	0.413894	0.472	0.332	4.27469e-05	0
Zfp277	2.93165e-09	0.438746	0.33	0.211	4.31774e-05	0
Gpatch2	2.93777e-09	0.602215	0.281	0.174	4.32675e-05	0
Psme4	3.00568e-09	0.364089	0.445	0.303	4.42676e-05	0
Chka	3.05627e-09	0.574965	0.284	0.175	4.50127e-05	0
Ubr5	3.14775e-09	0.487285	0.346	0.226	4.636e-05	0
Ppfia4	3.15415e-09	0.529666	0.317	0.201	4.64544e-05	0
Khdrbs1	3.16923e-09	0.371409	0.446	0.307	4.66764e-05	0
Map4k4	3.27374e-09	0.348333	0.604	0.445	4.82156e-05	0
Dnajc5	3.27538e-09	0.538171	0.31	0.197	4.82398e-05	0
Klhl7	3.36428e-09	0.682889	0.252	0.152	4.9549e-05	0
Tcf4	3.52826e-09	0.300582	0.769	0.63	5.19642e-05	0
Mia2	3.60426e-09	0.406487	0.455	0.322	5.30836e-05	0
Csnk2a1	3.63101e-09	0.599515	0.251	0.148	5.34775e-05	0
Tmem273	3.65583e-09	0.443534	0.387	0.26	5.38431e-05	0
Rmnd5a	3.69643e-09	0.593792	0.275	0.168	5.44411e-05	0
Itch	3.84374e-09	0.32625	0.596	0.438	5.66106e-05	0
Washc2	3.88355e-09	0.690581	0.254	0.153	5.7197e-05	0
Leng8	4.06494e-09	0.630042	0.294	0.186	5.98685e-05	0
Ash1l	4.0662e-09	0.300348	0.672	0.503	5.9887e-05	0
Zmym2	4.13328e-09	0.429744	0.385	0.259	6.08749e-05	0
P2rx7	4.15436e-09	0.362788	0.504	0.37	6.11855e-05	0
Ptbp2	4.24517e-09	0.547425	0.337	0.221	6.25228e-05	0
Lrp1	4.26907e-09	0.33564	0.587	0.438	6.28748e-05	0
Dcakd	4.2726e-09	0.355389	0.436	0.294	6.29268e-05	0
Mark3	4.28341e-09	0.418704	0.41	0.281	6.30861e-05	0
Trim33	4.29828e-09	0.534682	0.307	0.195	6.33051e-05	0
Hnrnpul1	4.3331e-09	0.551799	0.292	0.182	6.38179e-05	0
Dock1	4.34981e-09	0.377521	0.409	0.279	6.40639e-05	0
Eif2ak2	4.71941e-09	0.574659	0.258	0.156	6.95075e-05	0
Slc23a2	4.82148e-09	0.523977	0.301	0.188	7.10107e-05	0
Dnm2	4.83703e-09	0.258334	0.592	0.426	7.12398e-05	0
Hsd17b4	4.90606e-09	0.730703	0.257	0.157	7.22564e-05	0
Casc3	4.98811e-09	0.579748	0.292	0.185	7.34649e-05	0
Akna	5.05709e-09	0.555867	0.258	0.154	7.44808e-05	0
Pcmtd1	5.1257e-09	0.443199	0.434	0.305	7.54913e-05	0
Rgl1	5.35482e-09	0.525064	0.295	0.184	7.88657e-05	0
Mknk1	5.37732e-09	0.383022	0.466	0.328	7.91971e-05	0
Krit1	5.4106e-09	0.548601	0.324	0.211	7.96873e-05	0
Fto	5.68108e-09	0.429226	0.424	0.294	8.36709e-05	0
Nfatc1	5.70272e-09	0.532163	0.329	0.215	8.39897e-05	0
Rnf13	5.76026e-09	0.324292	0.529	0.383	8.48371e-05	0
Plcl1	6.05458e-09	0.257266	0.955	0.924	8.91718e-05	0
Fam13b	6.05495e-09	0.372753	0.466	0.326	8.91773e-05	0
Itga9	6.07954e-09	0.336749	0.466	0.322	8.95395e-05	0
Spred1	6.25697e-09	0.551862	0.275	0.169	9.21526e-05	0
Usp24	6.437e-09	0.364067	0.545	0.401	9.48041e-05	0
Tmem131l	6.46509e-09	0.519872	0.319	0.206	9.52179e-05	0
Depdc5	6.66532e-09	0.532163	0.323	0.21	9.81669e-05	0
Nfkb1	6.68955e-09	0.299266	0.58	0.424	9.85237e-05	0
Pkn1	6.85648e-09	0.38875	0.442	0.308	0.000100982	0
Dgkz	6.92316e-09	0.598812	0.253	0.153	0.000101964	0
Zfp148	7.11311e-09	0.379662	0.504	0.363	0.000104762	0
Arap1	7.57605e-09	0.619075	0.259	0.158	0.00011158	0
Fry	7.82489e-09	0.512025	0.37	0.25	0.000115245	0
Pacs1	7.88102e-09	0.345862	0.5	0.357	0.000116072	0
Ski	8.00651e-09	0.338882	0.604	0.457	0.00011792	0
Selenop	8.09036e-09	0.455663	0.396	0.275	0.000119155	0
Fam193a	8.15856e-09	0.330085	0.529	0.387	0.000120159	0
Fbxw7	8.56233e-09	0.44055	0.344	0.224	0.000126106	0
Ldhb	8.74706e-09	0.596319	0.274	0.17	0.000128827	0
Nlk	8.78708e-09	0.329286	0.464	0.323	0.000129416	0
Trim12a	8.79585e-09	0.450129	0.348	0.23	0.000129545	0
Wwc2	8.8205e-09	0.610053	0.278	0.174	0.000129908	0
Csnk1a1	8.82877e-09	0.455615	0.442	0.317	0.00013003	0
Ctsz	8.83742e-09	0.306004	0.622	0.462	0.000130158	0
Ubn2	8.97189e-09	0.292736	0.597	0.449	0.000132138	0
Rhoa	9.02403e-09	0.433451	0.314	0.201	0.000132906	0
Zmiz1	9.26662e-09	0.310456	0.557	0.409	0.000136479	0
Parp9	9.66985e-09	0.512958	0.286	0.181	0.000142418	0
Kcmf1	9.75336e-09	0.525466	0.327	0.215	0.000143647	0
Rapgef2	9.77096e-09	0.396347	0.435	0.305	0.000143907	0
Setd3	9.86824e-09	0.439359	0.362	0.241	0.000145339	0
Nbeal1	1.00973e-08	0.609245	0.299	0.193	0.000148714	0
Gpr160	1.033e-08	0.599377	0.28	0.176	0.00015214	0
Kcnk13	1.04612e-08	0.361469	0.467	0.331	0.000154072	0
Rabep1	1.06321e-08	0.385338	0.494	0.36	0.00015659	0
Ctsa	1.07258e-08	0.360758	0.388	0.261	0.000157969	0
Kctd12	1.08968e-08	0.469347	0.442	0.317	0.000160488	0
Lrrk1	1.11308e-08	0.310831	0.601	0.449	0.000163934	0
Tmem135	1.14222e-08	0.267115	0.719	0.556	0.000168226	0
Fgfr1op2	1.15301e-08	0.528002	0.274	0.169	0.000169815	0
Gab1	1.19147e-08	0.350811	0.471	0.332	0.00017548	0
Ptpra	1.20445e-08	0.33735	0.516	0.373	0.000177391	0
Olfr56	1.20474e-08	0.311619	0.512	0.368	0.000177435	0
Cdk13	1.21948e-08	0.285079	0.536	0.382	0.000179605	0
Dcaf8	1.22161e-08	0.494169	0.355	0.239	0.000179919	0
Fli1	1.23177e-08	0.273177	0.862	0.774	0.000181414	0
Irf8	1.24629e-08	0.380743	0.488	0.356	0.000183553	0
Tmem68	1.25807e-08	0.565897	0.269	0.167	0.000185288	0
Elp4	1.27526e-08	0.73899	0.26	0.164	0.00018782	0
Tyrobp	1.27672e-08	0.335884	0.456	0.322	0.000188036	0
Stat1	1.27787e-08	0.333083	0.273	0.167	0.000188205	0
Nf1	1.28121e-08	0.330126	0.638	0.492	0.000188697	0
Arl8b	1.29749e-08	0.602101	0.256	0.156	0.000191094	0
Pcf11	1.30729e-08	0.492334	0.359	0.243	0.000192537	0
Rnf111	1.30759e-08	0.277323	0.473	0.328	0.000192582	0
Lpp	1.31171e-08	0.454307	0.393	0.272	0.000193189	0
Acin1	1.31601e-08	0.417062	0.423	0.295	0.000193822	0
Entpd1	1.34786e-08	0.286537	0.878	0.783	0.000198513	0
Tm6sf1	1.35396e-08	0.334815	0.527	0.377	0.000199412	0
Mef2d	1.39266e-08	0.45832	0.313	0.201	0.000205111	0
Bmp2k	1.39437e-08	0.28058	0.774	0.638	0.000205363	0
Rasal3	1.40633e-08	0.463657	0.289	0.18	0.000207124	0
Ap1b1	1.4178e-08	0.382803	0.321	0.203	0.000208813	0
Rab7	1.50035e-08	0.558284	0.283	0.179	0.000220971	0
Evl	1.52808e-08	0.310946	0.515	0.37	0.000225056	0
Ppp2r5c	1.53393e-08	0.393098	0.428	0.298	0.000225917	0
Cttnbp2nl	1.53523e-08	0.262733	0.682	0.511	0.000226109	0
Cul5	1.5598e-08	0.595813	0.267	0.165	0.000229727	0
Wdfy4	1.64849e-08	0.305812	0.482	0.343	0.000242789	0
Gpatch2l	1.66307e-08	0.541164	0.291	0.187	0.000244936	0
Nfe2l2	1.66694e-08	0.426189	0.435	0.314	0.000245507	0
Atxn10	1.71297e-08	0.588797	0.3	0.196	0.000252286	0
Madd	1.79839e-08	0.478404	0.324	0.211	0.000264867	0
Copa	1.84255e-08	0.57402	0.268	0.167	0.000271371	0
Stk4	1.85149e-08	0.424811	0.375	0.256	0.000272688	0
Phyhd1	1.87346e-08	0.250318	0.724	0.563	0.000275924	0
Mgrn1	1.89413e-08	0.448932	0.3	0.19	0.000278968	0
Prkcd	1.94794e-08	0.302891	0.627	0.479	0.000286893	0
Phka2	1.99349e-08	0.569502	0.303	0.199	0.000293601	0
Morc3	2.00518e-08	0.325855	0.486	0.34	0.000295323	0
Il21r	2.00634e-08	0.392908	0.357	0.239	0.000295494	0
Rsf1	2.07987e-08	0.40367	0.439	0.314	0.000306324	0
Rin3	2.09936e-08	0.474775	0.342	0.228	0.000309194	0
Nrd1	2.10201e-08	0.464391	0.353	0.239	0.000309584	0
Irf2	2.11344e-08	0.322304	0.572	0.428	0.000311268	0
Bptf	2.2572e-08	0.439773	0.415	0.297	0.000332441	0
Man2b1	2.29101e-08	0.284117	0.55	0.401	0.00033742	0
Git2	2.33539e-08	0.308185	0.627	0.475	0.000343957	0
Atf7	2.44954e-08	0.460728	0.447	0.329	0.000360768	0
Gm46224	2.5185e-08	0.516944	0.26	0.161	0.000370924	0
Prkn	2.55753e-08	0.282212	0.714	0.594	0.000376673	0
Pdcd6ip	2.60561e-08	0.59675	0.252	0.155	0.000383755	0
Ubac2	2.62291e-08	0.313468	0.498	0.356	0.000386302	0
Cep152	2.63567e-08	0.53876	0.317	0.21	0.000388182	0
Map3k2	2.65914e-08	0.573533	0.306	0.203	0.000391639	0
Fcgr1	2.71529e-08	0.489077	0.296	0.19	0.000399907	0
Nfatc2	2.72414e-08	0.412489	0.332	0.217	0.000401211	0
Slc12a9	2.81811e-08	0.518081	0.285	0.18	0.000415052	0
Mau2	2.82182e-08	0.534421	0.263	0.163	0.000415597	0
Rap1a	2.87264e-08	0.297824	0.472	0.334	0.000423083	0
Gng2	2.91346e-08	0.314561	0.548	0.403	0.000429095	0
St3gal5	2.97605e-08	0.316736	0.486	0.351	0.000438313	0
Vps4b	3.04552e-08	0.558026	0.274	0.173	0.000448544	0
Pik3r5	3.11428e-08	0.360519	0.381	0.259	0.000458671	0
Manba	3.19858e-08	0.495531	0.27	0.168	0.000471088	0
Ankrd11	3.21478e-08	0.271854	0.654	0.496	0.000473473	0
Spopl	3.26384e-08	0.480182	0.302	0.196	0.000480699	0
Noct	3.28002e-08	0.464367	0.251	0.152	0.000483081	0
Plcg2	3.30043e-08	0.326468	0.579	0.432	0.000486087	0
Capza2	3.36669e-08	0.290891	0.569	0.415	0.000495847	0
Cables1	3.37947e-08	0.422223	0.354	0.24	0.000497729	0
Eml6	3.41508e-08	0.427666	0.429	0.304	0.000502973	0
Zfp951	3.42723e-08	0.501951	0.275	0.173	0.000504762	0
Frs2	3.54218e-08	0.532214	0.274	0.174	0.000521693	0
Nmt1	3.54496e-08	0.415414	0.362	0.245	0.000522101	0
Sncaip	3.625e-08	0.410079	0.294	0.187	0.00053389	0
Kif16b	3.63399e-08	0.517936	0.28	0.177	0.000535214	0
Stat3	3.70294e-08	0.422459	0.326	0.213	0.000545369	0
Cpsf6	3.93501e-08	0.32309	0.458	0.322	0.000579548	0
Plekhm2	4.02106e-08	0.547633	0.279	0.178	0.000592222	0
Gm4258	4.10221e-08	0.395942	0.428	0.305	0.000604173	0
Babam2	4.326e-08	0.380272	0.504	0.373	0.000637133	0
Tubgcp5	4.36472e-08	0.36087	0.565	0.423	0.000642836	0
Sh3glb1	4.38428e-08	0.357238	0.469	0.343	0.000645717	0
Scamp5	4.46357e-08	0.455371	0.342	0.231	0.000657394	0
Brwd1	4.556e-08	0.511317	0.303	0.199	0.000671007	0
Ube2g1	4.59028e-08	0.660516	0.258	0.164	0.000676056	0
Fmnl2	4.63278e-08	0.385154	0.377	0.265	0.000682316	0
Tpcn1	4.63293e-08	0.532539	0.271	0.172	0.000682337	0
Pla2g15	4.66715e-08	0.44631	0.3	0.193	0.000687378	0
Taok1	4.70148e-08	0.333505	0.499	0.362	0.000692434	0
Syngr1	4.74156e-08	0.302502	0.504	0.362	0.000698337	0
Cdip1	4.74659e-08	0.665926	0.259	0.166	0.000699077	0
Lrp5	4.84383e-08	0.499909	0.337	0.229	0.000713399	0
Ino80d	4.87442e-08	0.430527	0.322	0.213	0.000717904	0
Ahcyl2	4.9379e-08	0.525629	0.317	0.209	0.000727253	0
Bicra	5.0522e-08	0.416301	0.364	0.249	0.000744088	0
Rac1	5.15746e-08	0.427558	0.283	0.178	0.000759591	0
Rala	5.18315e-08	0.455579	0.251	0.153	0.000763374	0
Sbno1	5.22281e-08	0.452799	0.356	0.244	0.000769215	0
Dtx4	5.30956e-08	0.594843	0.256	0.161	0.000781992	0
Sec24b	5.49492e-08	0.518759	0.278	0.178	0.000809291	0
AC160336.1	5.69819e-08	0.471866	0.308	0.204	0.00083923	0
Dennd6a	5.79715e-08	0.402892	0.408	0.286	0.000853805	0
Arid3b	5.83347e-08	0.476684	0.294	0.19	0.000859153	0
Med13l	5.96419e-08	0.299051	0.529	0.387	0.000878406	0
Riok3	6.29568e-08	0.492452	0.303	0.2	0.000927228	0
Tasor	6.40143e-08	0.373531	0.446	0.326	0.000942803	0
Snx10	6.4829e-08	0.538171	0.289	0.187	0.000954802	0
Ubap2l	6.62282e-08	0.335613	0.453	0.32	0.000975408	0
Tlr7	6.70691e-08	0.375592	0.471	0.343	0.000987794	0
Mib1	6.74583e-08	0.405507	0.345	0.232	0.000993526	0
Map2k4	6.79485e-08	0.536667	0.269	0.17	0.00100075	0
Foxk2	6.85167e-08	0.4786	0.259	0.162	0.00100911	0
Cd9	7.27048e-08	0.305419	0.527	0.391	0.0010708	0
Zkscan3	7.27541e-08	0.455699	0.31	0.205	0.00107152	0
Rogdi	7.39816e-08	0.544925	0.264	0.168	0.0010896	0
Ncoa3	7.45087e-08	0.287079	0.49	0.351	0.00109736	0
Rb1	7.52588e-08	0.29609	0.528	0.391	0.00110841	0
Lpcat3	7.53602e-08	0.517911	0.305	0.201	0.0011099	0
Zmynd11	7.88559e-08	0.348269	0.394	0.271	0.00116139	0
Mark2	7.98327e-08	0.322406	0.458	0.332	0.00117578	0
Sgce	8.16342e-08	0.548712	0.292	0.194	0.00120231	0
Glud1	8.30012e-08	0.513923	0.258	0.162	0.00122244	0
Itprid2	8.31443e-08	0.512741	0.254	0.159	0.00122455	0
Ccm2	8.35611e-08	0.471198	0.329	0.22	0.00123069	0
Tmem175	8.55724e-08	0.542343	0.268	0.171	0.00126031	0
Cul3	8.70929e-08	0.444683	0.335	0.226	0.0012827	0
Tnrc6c	8.75807e-08	0.360923	0.435	0.308	0.00128989	0
Akr1a1	8.80442e-08	0.523977	0.252	0.157	0.00129672	0
Prcp	8.95775e-08	0.411868	0.373	0.263	0.0013193	0
2510009E07Rik	8.98619e-08	0.517326	0.276	0.178	0.00132349	0
Dhx57	9.35549e-08	0.510599	0.284	0.184	0.00137788	0
Ppp4r1	9.383e-08	0.438614	0.317	0.209	0.00138193	0
Vps13c	9.50213e-08	0.448932	0.337	0.228	0.00139947	0
Ppp6r2	9.64821e-08	0.517775	0.299	0.198	0.00142099	0
Akt3	9.6486e-08	0.663477	0.256	0.162	0.00142105	0
Cdk8	9.72237e-08	0.50907	0.281	0.181	0.00143191	0
Gatad2b	9.80977e-08	0.374255	0.404	0.286	0.00144478	0
Smad4	9.8506e-08	0.556859	0.259	0.165	0.0014508	0
Pou2f1	9.86701e-08	0.424208	0.364	0.251	0.00145321	0
Mgat4a	1.02231e-07	0.267789	0.709	0.575	0.00150565	0
Hdlbp	1.02919e-07	0.539149	0.259	0.165	0.00151579	0
Kdm2a	1.03567e-07	0.278932	0.533	0.404	0.00152534	0
Pik3cd	1.0907e-07	0.32701	0.525	0.392	0.00160639	0
Vps9d1	1.09341e-07	0.515025	0.281	0.183	0.00161037	0
Tsc22d2	1.09688e-07	0.351885	0.402	0.283	0.00161548	0
Sppl3	1.10955e-07	0.287715	0.528	0.391	0.00163415	0
Marf1	1.119e-07	0.456838	0.342	0.235	0.00164806	0
Ncoa6	1.15671e-07	0.591776	0.257	0.164	0.0017036	0
Tln1	1.21738e-07	0.561389	0.258	0.165	0.00179295	0
Cog5	1.27556e-07	0.257573	0.543	0.401	0.00187864	0
Ddx3y	1.31917e-07	0.488548	0.275	0.177	0.00194288	0
Mpc1	1.35731e-07	0.493079	0.326	0.223	0.00199905	0
Specc1	1.37087e-07	0.274269	0.759	0.628	0.00201902	0
Fcer1g	1.37552e-07	0.271433	0.459	0.332	0.00202586	0
Acsl4	1.40541e-07	0.419016	0.364	0.252	0.00206989	0
Nrf1	1.40971e-07	0.335838	0.416	0.293	0.00207622	0
Ube2w	1.50291e-07	0.489048	0.27	0.174	0.00221349	0
Abhd12	1.52733e-07	0.283557	0.764	0.649	0.00224945	0
Atrx	1.52941e-07	0.298817	0.59	0.452	0.00225251	0
Nedd4l	1.54877e-07	0.269096	0.434	0.304	0.00228103	0
Arhgef11	1.5612e-07	0.423512	0.321	0.215	0.00229933	0
Zfand6	1.59023e-07	0.255759	0.504	0.365	0.00234209	0
Ap3d1	1.60978e-07	0.517229	0.251	0.158	0.00237088	0
Ago3	1.71322e-07	0.387106	0.456	0.34	0.00252324	0
Trpc4ap	1.72488e-07	0.530225	0.342	0.238	0.0025404	0
Kmt2c	1.76539e-07	0.263945	0.658	0.51	0.00260006	0
Commd10	1.84561e-07	0.425888	0.264	0.167	0.00271821	0
Bod1l	1.86875e-07	0.478299	0.281	0.184	0.0027523	0
Ikbkb	1.86925e-07	0.467843	0.306	0.204	0.00275302	0
Etnk1	1.87155e-07	0.43782	0.292	0.192	0.00275642	0
Rab14	1.90993e-07	0.344859	0.416	0.295	0.00281295	0
Stim1	1.91115e-07	0.532821	0.279	0.184	0.00281474	0
Cds1	1.92272e-07	0.38252	0.381	0.266	0.00283178	0
Lnpep	1.95027e-07	0.28751	0.534	0.394	0.00287235	0
Sema4d	1.96307e-07	0.398993	0.362	0.252	0.00289121	0
Slx4ip	1.96575e-07	0.475955	0.263	0.168	0.00289516	0
Dpp8	1.97041e-07	0.504337	0.316	0.216	0.00290202	0
Mfhas1	2.03943e-07	0.407581	0.294	0.192	0.00300367	0
Nsf	2.04911e-07	0.461395	0.327	0.225	0.00301793	0
Nptn	2.06392e-07	0.362576	0.42	0.302	0.00303975	0
Zfp644	2.07005e-07	0.381096	0.382	0.271	0.00304877	0
Nudcd3	2.08624e-07	0.391657	0.345	0.237	0.00307262	0
Mbtd1	2.10142e-07	0.359051	0.5	0.375	0.00309497	0
Kmt2e	2.16143e-07	0.276104	0.585	0.439	0.00318336	0
Cd2ap	2.16553e-07	0.278535	0.539	0.399	0.00318939	0
Hltf	2.1783e-07	0.336263	0.447	0.321	0.0032082	0
Tial1	2.18937e-07	0.352356	0.424	0.302	0.00322451	0
Pak2	2.23156e-07	0.315103	0.436	0.309	0.00328664	0
Snapc3	2.30662e-07	0.601762	0.274	0.182	0.00339719	0
Lmo2	2.37543e-07	0.41014	0.314	0.21	0.00349853	0
Slc16a6	2.41275e-07	0.278082	0.455	0.322	0.0035535	0
Htt	2.42634e-07	0.537092	0.279	0.184	0.00357352	0
Wdr20	2.42833e-07	0.536554	0.265	0.174	0.00357644	0
Fam120b	2.45088e-07	0.50397	0.269	0.175	0.00360965	0
Iqsec2	2.45152e-07	0.454591	0.307	0.206	0.00361059	0
Cdc42	2.47201e-07	0.29041	0.537	0.407	0.00364078	0
Nck1	2.49729e-07	0.462874	0.299	0.198	0.00367801	0
Acer3	2.56111e-07	0.306561	0.59	0.449	0.003772	0
Nsmaf	2.58291e-07	0.362822	0.353	0.242	0.00380411	0
St3gal3	2.60738e-07	0.410757	0.385	0.276	0.00384015	0
Col4a3bp	2.6455e-07	0.543656	0.276	0.183	0.00389629	0
Rel	2.68351e-07	0.418164	0.351	0.244	0.00395227	0
Pxk	2.68473e-07	0.497982	0.281	0.186	0.00395407	0
Eif4g3	2.70004e-07	0.259478	0.623	0.478	0.00397662	0
Map4	2.72329e-07	0.301794	0.631	0.491	0.00401086	0
St5	2.78133e-07	0.542252	0.251	0.159	0.00409635	0
Btk	2.81085e-07	0.319761	0.446	0.323	0.00413982	0
Relch	2.82332e-07	0.309627	0.407	0.286	0.00415819	0
R3hdm2	2.9021e-07	0.341191	0.425	0.311	0.00427422	0
Tcirg1	2.93292e-07	0.346241	0.394	0.281	0.00431961	0
Taf15	3.09664e-07	0.306969	0.493	0.365	0.00456073	0
Hook3	3.1524e-07	0.430595	0.377	0.269	0.00464286	0
AU040320	3.16589e-07	0.499414	0.307	0.209	0.00466272	0
Atf6	3.17563e-07	0.417507	0.408	0.296	0.00467707	0
Tspan14	3.29474e-07	0.35451	0.453	0.334	0.00485249	0
Nr6a1os	3.41215e-07	0.370826	0.371	0.262	0.00502541	0
Med13	3.43239e-07	0.338062	0.423	0.305	0.00505523	0
Ankle2	3.51689e-07	0.54105	0.269	0.177	0.00517967	0
Vps35l	3.53386e-07	0.501477	0.286	0.191	0.00520468	0
Rbm5	3.58058e-07	0.271995	0.545	0.412	0.00527348	0
4930469K13Rik	3.58963e-07	0.392254	0.371	0.262	0.0052868	0
Apbb2	3.69166e-07	0.535988	0.311	0.216	0.00543707	0
Arhgap39	3.74958e-07	0.275619	0.633	0.495	0.00552239	0
Zfp638	3.90267e-07	0.255045	0.569	0.43	0.00574785	0
Zfyve1	3.93017e-07	0.503392	0.276	0.184	0.00578835	0
Pcca	3.96626e-07	0.435172	0.297	0.198	0.00584151	0
Xrn2	3.98471e-07	0.368886	0.373	0.262	0.00586869	0
Hmox2	3.98558e-07	0.458025	0.303	0.206	0.00586996	0
Usp32	4.12727e-07	0.507405	0.276	0.184	0.00607865	0
Fbxw4	4.13849e-07	0.42266	0.364	0.256	0.00609516	0
Lgals8	4.40524e-07	0.419723	0.265	0.173	0.00648804	0
Prrc2c	4.43322e-07	0.322964	0.48	0.361	0.00652924	0
Thoc2	4.60681e-07	0.346481	0.436	0.315	0.0067849	0
Ppp2r5a	4.68859e-07	0.553635	0.258	0.17	0.00690536	0
Rnf38	4.72819e-07	0.433057	0.344	0.238	0.00696368	0
Elf1	4.77583e-07	0.322352	0.462	0.338	0.00703384	0
Tbk1	4.81281e-07	0.366224	0.371	0.262	0.0070883	0
Cebpg	4.82305e-07	0.366524	0.343	0.238	0.00710338	0
Zdhhc20	4.90971e-07	0.400399	0.36	0.254	0.00723101	0
Lcp2	5.04272e-07	0.310797	0.504	0.379	0.00742692	0
Tbl1x	5.13722e-07	0.383737	0.478	0.362	0.0075661	0
Snap23	5.14404e-07	0.448988	0.275	0.181	0.00757614	0
Nipa2	5.15284e-07	0.399366	0.327	0.223	0.0075891	0
Rnf169	5.16036e-07	0.323131	0.563	0.437	0.00760019	0
Plxna4	5.20247e-07	0.255113	0.673	0.53	0.0076622	0
Trak1	5.20707e-07	0.551506	0.283	0.192	0.00766897	0
Arrb2	5.30868e-07	0.3537	0.426	0.312	0.00781862	0
Srcap	5.34752e-07	0.338452	0.357	0.249	0.00787582	0
Chd4	5.41555e-07	0.481493	0.273	0.18	0.00797602	0
Tax1bp1	5.56341e-07	0.497307	0.286	0.192	0.00819379	0
Jarid2	5.59737e-07	0.35455	0.364	0.254	0.0082438	0
Wwp1	5.74737e-07	0.264606	0.353	0.244	0.00846472	0
Ccnl2	5.83411e-07	0.369585	0.364	0.254	0.00859248	0
Cdk17	5.86064e-07	0.35278	0.337	0.229	0.00863154	0
Tut7	6.04346e-07	0.283999	0.466	0.344	0.00890082	0
Zyg11b	6.09312e-07	0.41567	0.355	0.25	0.00897395	0
Cdk19	6.11528e-07	0.282756	0.522	0.396	0.00900658	0
Zmym4	6.16488e-07	0.33902	0.434	0.314	0.00907963	0
Hs2st1	6.22036e-07	0.452017	0.31	0.213	0.00916134	0
Dhx9	6.23875e-07	0.328901	0.405	0.295	0.00918843	0
Snrnp70	6.33524e-07	0.254444	0.666	0.516	0.00933055	0
Arhgap30	6.40263e-07	0.402216	0.386	0.278	0.00942979	0
Sfpq	6.71228e-07	0.385653	0.396	0.289	0.00988584	0
Mdm4	7.01977e-07	0.298585	0.436	0.314	0.0103387	0
Ranbp9	7.05708e-07	0.492795	0.337	0.239	0.0103937	0
Smim14	7.10936e-07	0.478345	0.267	0.175	0.0104707	0
Ggnbp2	7.16177e-07	0.44631	0.296	0.202	0.0105479	0
Gmip	7.54364e-07	0.363618	0.369	0.258	0.0111103	0
Creb1	7.8741e-07	0.327238	0.41	0.299	0.011597	0
Bin2	7.89497e-07	0.311625	0.472	0.36	0.0116277	0
Ctsc	7.99923e-07	0.252493	0.466	0.339	0.0117813	0
Dip2c	8.07264e-07	0.328379	0.376	0.266	0.0118894	0
Atp6v0a2	8.16743e-07	0.379355	0.328	0.227	0.012029	0
Ralgps2	8.18899e-07	0.443618	0.275	0.182	0.0120608	0
Rfx7	8.24948e-07	0.59365	0.283	0.194	0.0121498	0
Mbnl2	8.26802e-07	0.259857	0.7	0.551	0.0121771	0
Cyba	8.46124e-07	0.259562	0.432	0.31	0.0124617	0
Senp6	8.60214e-07	0.406646	0.388	0.281	0.0126692	0
Hmg20a	8.76042e-07	0.360234	0.327	0.225	0.0129023	0
Slc37a2	8.86941e-07	0.51635	0.251	0.164	0.0130629	0
Fbxw11	8.9443e-07	0.423909	0.346	0.247	0.0131732	0
Scoc	9.00457e-07	0.27588	0.538	0.413	0.0132619	0
Psen1	9.04436e-07	0.435313	0.265	0.175	0.0133205	0
Tut4	9.35196e-07	0.29623	0.517	0.395	0.0137736	0
Kif3b	9.41008e-07	0.460644	0.252	0.163	0.0138592	0
Rmdn1	9.46127e-07	0.35312	0.364	0.256	0.0139346	0
Morf4l1	1.00312e-06	0.475184	0.274	0.185	0.014774	0
Eya3	1.00467e-06	0.477598	0.26	0.172	0.0147968	0
Ptbp3	1.01279e-06	0.250779	0.59	0.456	0.0149164	0
Lamp1	1.01866e-06	0.339894	0.345	0.241	0.0150028	0
Mkln1	1.02064e-06	0.255305	0.585	0.444	0.015032	0
Abl2	1.04197e-06	0.34691	0.345	0.24	0.0153462	0
Phc3	1.05553e-06	0.441796	0.323	0.226	0.0155459	0
Rasal2	1.06392e-06	0.352172	0.383	0.277	0.0156694	0
Rhobtb1	1.06939e-06	0.400404	0.413	0.31	0.0157499	0
Cnot2	1.08781e-06	0.251757	0.622	0.479	0.0160213	0
Dcaf5	1.0926e-06	0.443607	0.31	0.214	0.0160918	0
Exoc4	1.11274e-06	0.277097	0.778	0.633	0.0163885	0
Srrm1	1.1301e-06	0.423563	0.372	0.271	0.0166442	0
B4galt1	1.13076e-06	0.253064	0.51	0.374	0.0166538	0
Pik3cg	1.13355e-06	0.38219	0.329	0.229	0.016695	0
Dyrk1a	1.18473e-06	0.288142	0.45	0.332	0.0174486	0
Arpc2	1.18945e-06	0.312237	0.404	0.291	0.0175182	0
Atxn2	1.19514e-06	0.390305	0.35	0.249	0.017602	0
Cop1	1.20705e-06	0.349365	0.383	0.276	0.0177775	0
Dym	1.21288e-06	0.478688	0.297	0.205	0.0178633	0
Rab1a	1.23901e-06	0.422577	0.312	0.218	0.0182481	0
Ankfy1	1.24544e-06	0.406942	0.382	0.278	0.0183428	0
Rtn4rl1	1.26833e-06	0.308015	0.441	0.327	0.01868	0
Strada	1.28161e-06	0.40011	0.301	0.206	0.0188756	0
Tm9sf2	1.30672e-06	0.453012	0.308	0.216	0.0192454	0
Kpna3	1.34275e-06	0.361595	0.343	0.24	0.019776	0
Hectd1	1.39562e-06	0.308286	0.385	0.273	0.0205547	0
Mast3	1.40899e-06	0.513923	0.283	0.194	0.0207516	0
Mtus1	1.42206e-06	0.317062	0.55	0.434	0.0209442	0
Rhoh	1.44201e-06	0.304408	0.453	0.338	0.021238	0
Hck	1.44438e-06	0.254242	0.553	0.421	0.0212729	0
Hnrnph3	1.45735e-06	0.41069	0.3	0.207	0.0214639	0
Grina	1.4653e-06	0.361653	0.324	0.227	0.0215809	0
Fbrsl1	1.4727e-06	0.292266	0.443	0.326	0.0216899	0
Exoc2	1.50841e-06	0.475955	0.27	0.182	0.0222159	0
Tlk1	1.51955e-06	0.443743	0.324	0.23	0.0223799	0
Kdm2b	1.53636e-06	0.371445	0.36	0.257	0.0226275	0
Wdr26	1.54288e-06	0.256194	0.51	0.381	0.0227235	0
Ntpcr	1.54858e-06	0.291531	0.429	0.314	0.0228075	0
Nbr1	1.57248e-06	0.471755	0.252	0.167	0.0231595	0
Kmt5b	1.59014e-06	0.387454	0.345	0.246	0.0234196	0
Sec14l1	1.64419e-06	0.368471	0.361	0.259	0.0242157	0
Atxn7	1.64947e-06	0.36963	0.386	0.281	0.0242934	0
Gmeb1	1.6532e-06	0.436581	0.254	0.168	0.0243483	0
Ankrd10	1.68984e-06	0.505829	0.253	0.168	0.024888	0
Gm16599	1.6914e-06	0.256265	0.539	0.408	0.0249109	0
Trim44	1.72906e-06	0.408198	0.308	0.215	0.0254656	0
Elf4	1.73349e-06	0.330074	0.364	0.261	0.0255309	0
Rsu1	1.75166e-06	0.344711	0.31	0.213	0.0257985	0
Nr1d2	1.76514e-06	0.518111	0.262	0.177	0.025997	0
Srpk2	1.77669e-06	0.321124	0.474	0.36	0.0261671	0
Fez2	1.78491e-06	0.374339	0.26	0.171	0.0262881	0
Casd1	1.80734e-06	0.39734	0.302	0.208	0.0266185	0
Ubtd1	1.80882e-06	0.383669	0.275	0.184	0.0266402	0
Shoc2	1.87412e-06	0.446809	0.257	0.17	0.0276021	0
Nfat5	1.89504e-06	0.288158	0.536	0.416	0.0279102	0
Mxi1	1.9509e-06	0.46413	0.254	0.169	0.0287328	0
Hexa	1.99168e-06	0.282411	0.387	0.277	0.0293334	0
Bcor	2.03759e-06	0.403488	0.269	0.179	0.0300096	0
Cyld	2.07907e-06	0.274958	0.367	0.259	0.0306205	0
Il18	2.12856e-06	0.482919	0.274	0.187	0.0313494	0
Stxbp3	2.17131e-06	0.390325	0.29	0.197	0.031979	0
Cdk12	2.23146e-06	0.252986	0.511	0.385	0.0328649	0
Nrp1	2.33839e-06	0.275657	0.367	0.267	0.0344398	0
Srek1	2.35807e-06	0.291713	0.431	0.321	0.0347297	0
Znrf1	2.36606e-06	0.284161	0.389	0.279	0.0348473	0
Ttc7	2.38147e-06	0.331405	0.31	0.212	0.0350743	0
Safb2	2.41198e-06	0.330091	0.303	0.209	0.0355236	0
Trpm7	2.43556e-06	0.319053	0.491	0.374	0.0358709	0
Csnk1e	2.5184e-06	0.349764	0.299	0.204	0.0370911	0
Arnt	2.59311e-06	0.357427	0.337	0.238	0.0381914	0
Kdm3a	2.66698e-06	0.348636	0.26	0.172	0.0392792	0
Dnajb6	2.66804e-06	0.306093	0.362	0.258	0.039295	0
Ppig	2.6889e-06	0.450822	0.258	0.173	0.0396021	0
Rasa1	2.72593e-06	0.269364	0.431	0.317	0.0401475	0
Cradd	2.74426e-06	0.254035	0.436	0.322	0.0404175	0
Tpst2	2.80472e-06	0.305965	0.355	0.251	0.0413079	0
Setdb1	2.80834e-06	0.37905	0.34	0.245	0.0413612	0
Ggta1	2.80849e-06	0.431212	0.314	0.223	0.0413635	0
Gsk3b	2.82377e-06	0.268235	0.505	0.387	0.0415885	0
Rc3h2	2.84003e-06	0.385386	0.286	0.195	0.041828	0
Atp7a	2.87804e-06	0.31091	0.386	0.28	0.0423878	0
Ube2d3	2.88619e-06	0.335547	0.354	0.252	0.0425078	0
Strn3	2.90654e-06	0.269787	0.569	0.445	0.0428075	0
Usp47	2.98534e-06	0.363403	0.329	0.232	0.0439681	0
Gpr155	3.1236e-06	0.475104	0.251	0.167	0.0460044	0
Larp4b	3.29238e-06	0.262179	0.425	0.31	0.0484902	0
Btbd7	3.33927e-06	0.253368	0.425	0.312	0.0491808	0
Pnpla8	3.34492e-06	0.430459	0.283	0.194	0.0492639	0
Fam168a	3.43164e-06	0.259964	0.482	0.362	0.0505412	0
Zfp292	3.51967e-06	0.251032	0.489	0.37	0.0518377	0
Tmbim6	3.7706e-06	0.26248	0.373	0.268	0.0555334	0
Rab2a	3.86414e-06	0.308653	0.393	0.288	0.056911	0
Hnrnpm	3.86444e-06	0.304831	0.418	0.314	0.0569155	0
Bclaf1	3.91449e-06	0.29512	0.366	0.262	0.0576526	0
Chchd3	3.93938e-06	0.498592	0.303	0.218	0.0580192	0
Msn	3.98233e-06	0.327857	0.353	0.253	0.0586517	0
Rbbp6	4.06819e-06	0.36513	0.308	0.216	0.0599163	0
Rcsd1	4.15251e-06	0.288805	0.48	0.367	0.0611582	0
Smad3	4.22867e-06	0.290646	0.383	0.279	0.0622799	0
Gls	4.25402e-06	0.296451	0.378	0.274	0.0626533	0
Rab39	4.32264e-06	0.493877	0.251	0.169	0.0636639	0
Usp40	4.42775e-06	0.337758	0.291	0.2	0.0652119	0
Tor1aip1	4.46604e-06	0.307157	0.388	0.288	0.0657759	0
Arih2	4.47653e-06	0.407946	0.302	0.214	0.0659303	0
Tm9sf3	4.65844e-06	0.441294	0.256	0.173	0.0686096	0
Ppp3cb	4.79571e-06	0.366572	0.307	0.215	0.0706312	0
Ubr3	5.03346e-06	0.31577	0.407	0.302	0.0741328	0
Aatf	5.20552e-06	0.366947	0.267	0.181	0.076667	0
Prpf40a	5.33239e-06	0.349112	0.319	0.225	0.0785354	0
Slf2	5.40846e-06	0.353573	0.357	0.26	0.0796558	0
Fip1l1	5.43855e-06	0.476822	0.251	0.17	0.0800989	0
Garnl3	5.44826e-06	0.438285	0.353	0.262	0.080242	0
Rapgef1	5.5143e-06	0.296471	0.429	0.322	0.0812147	0
Zfp280d	5.5721e-06	0.43544	0.305	0.217	0.0820658	0
Stau1	5.62337e-06	0.377928	0.318	0.227	0.082821	0
Phactr2	5.90056e-06	0.318388	0.416	0.312	0.0869035	0
Fyco1	5.909e-06	0.321214	0.359	0.261	0.0870277	0
Slc40a1	6.05711e-06	0.307072	0.328	0.232	0.0892091	0
Setd2	6.15061e-06	0.273326	0.494	0.375	0.0905863	0
Scaf11	6.40055e-06	0.288192	0.339	0.24	0.0942674	0
Pdpk1	6.40302e-06	0.458214	0.26	0.178	0.0943036	0
Map2k6	6.44104e-06	0.462813	0.269	0.187	0.0948636	0
Nr2c2	6.5959e-06	0.338006	0.382	0.285	0.0971444	0
Ssbp2	7.06757e-06	0.282695	0.458	0.346	0.104091	0
Crk	7.0715e-06	0.437597	0.285	0.201	0.104149	0
Prpsap2	7.09388e-06	0.336183	0.324	0.231	0.104479	0
Caprin1	7.31302e-06	0.391066	0.323	0.232	0.107706	0
Ubxn7	7.318e-06	0.404279	0.258	0.175	0.10778	0
Rasa3	7.45347e-06	0.383114	0.294	0.204	0.109775	0
Opa1	7.50402e-06	0.442008	0.254	0.174	0.110519	0
Myh9	7.75171e-06	0.300081	0.394	0.291	0.114167	0
Phf20	7.81805e-06	0.335197	0.38	0.283	0.115144	0
Pdss2	7.84963e-06	0.527415	0.256	0.178	0.115609	0
Arih1	7.89391e-06	0.253003	0.534	0.409	0.116261	0
Kat2b	8.19342e-06	0.32208	0.322	0.228	0.120673	0
Ppm1l	8.21839e-06	0.473984	0.31	0.226	0.12104	0
Thada	8.33773e-06	0.396692	0.372	0.284	0.122798	0
Spi1	8.50654e-06	0.274359	0.441	0.339	0.125284	0
Tec	8.61217e-06	0.331632	0.393	0.293	0.12684	0
Gm15614	8.80388e-06	0.293258	0.345	0.249	0.129664	0
Tlk2	8.92006e-06	0.392758	0.295	0.206	0.131375	0
Epc2	9.0138e-06	0.37642	0.322	0.232	0.132755	0
Ap1g1	9.12898e-06	0.322221	0.362	0.267	0.134452	0
Trip11	9.19725e-06	0.354477	0.338	0.244	0.135457	0
Esco1	9.4895e-06	0.346205	0.262	0.177	0.139761	0
Gm28501	9.63625e-06	0.317884	0.31	0.217	0.141923	0
Atp6v0c	9.76596e-06	0.362936	0.289	0.202	0.143833	0
U2surp	9.79499e-06	0.426693	0.3	0.213	0.144261	0
Zfp207	1.03085e-05	0.250889	0.365	0.261	0.151824	0
Rlf	1.08059e-05	0.304718	0.323	0.228	0.15915	0
Braf	1.09546e-05	0.309305	0.324	0.232	0.161339	0
4930470G03Rik	1.10039e-05	0.285907	0.294	0.203	0.162065	0
Synrg	1.12054e-05	0.355497	0.265	0.182	0.165033	0
Man1a	1.19659e-05	0.325345	0.597	0.491	0.176234	0
Gm15563	1.20978e-05	0.27278	0.274	0.187	0.178176	0
Aff4	1.26814e-05	0.368766	0.35	0.26	0.186772	0
Ankhd1	1.30569e-05	0.250541	0.549	0.437	0.192302	0
Ptpn18	1.32141e-05	0.369096	0.263	0.181	0.194617	0
Cstf3	1.34565e-05	0.267629	0.349	0.252	0.198187	0
Slc30a9	1.3731e-05	0.394342	0.281	0.199	0.202231	0
H3f3b	1.39185e-05	0.389179	0.267	0.186	0.204991	0
Stk10	1.39639e-05	0.37328	0.303	0.218	0.205661	0
Zzef1	1.46275e-05	0.453072	0.283	0.203	0.215433	0
Hspa4	1.51867e-05	0.330977	0.269	0.185	0.22367	0
4932438A13Rik	1.54732e-05	0.402229	0.357	0.269	0.22789	0
Ostf1	1.55406e-05	0.454226	0.278	0.197	0.228882	0
Vgll4	1.55536e-05	0.285079	0.398	0.297	0.229074	0
Ubn1	1.55595e-05	0.383209	0.285	0.202	0.229161	0
Hnrnpdl	1.57174e-05	0.368066	0.301	0.216	0.231486	0
Dlc1	1.59638e-05	0.388867	0.291	0.209	0.235115	0
Cdc42se2	1.68446e-05	0.394342	0.253	0.174	0.248088	0
Npc1	1.78687e-05	0.390003	0.257	0.177	0.263171	0
Copg2	1.80061e-05	0.341508	0.299	0.213	0.265193	0
Gtdc1	1.84694e-05	0.295027	0.553	0.445	0.272018	0
Litaf	1.89905e-05	0.481389	0.265	0.188	0.279693	0
4833420G17Rik	1.97528e-05	0.313126	0.291	0.204	0.290919	0
Abl1	2.0574e-05	0.284774	0.434	0.331	0.303013	0
Sipa1l1	2.1179e-05	0.259741	0.459	0.353	0.311924	0
Uimc1	2.23272e-05	0.319176	0.287	0.203	0.328834	0
Ino80	2.23273e-05	0.312855	0.302	0.214	0.328836	0
Cmklr1	2.24399e-05	0.374854	0.302	0.218	0.330495	0
Nfatc3	2.34188e-05	0.366959	0.303	0.219	0.344912	0
Smurf1	2.38899e-05	0.318276	0.313	0.226	0.35185	0
Cfap74	2.4363e-05	0.265861	0.327	0.237	0.358819	0
Nr3c2	2.49264e-05	0.37941	0.265	0.186	0.367116	0
Ddhd2	2.56544e-05	0.341654	0.289	0.204	0.377838	0
Camkk2	2.5689e-05	0.406681	0.269	0.19	0.378347	0
Usp25	2.61121e-05	0.31923	0.303	0.218	0.384578	0
Chsy1	2.63604e-05	0.396831	0.267	0.189	0.388236	0
Rsrc2	2.66263e-05	0.281423	0.369	0.276	0.392153	0
Cep85l	2.79991e-05	0.426268	0.267	0.188	0.412371	0
Slc15a2	2.82264e-05	0.286782	0.351	0.26	0.415718	0
Eif4a2	2.84708e-05	0.304731	0.256	0.175	0.419318	0
Ktn1	2.88499e-05	0.312903	0.447	0.355	0.424901	0
Wsb1	2.94867e-05	0.273948	0.435	0.334	0.43428	0
Usp3	3.16466e-05	0.28383	0.338	0.248	0.466091	0
Phf12	3.18096e-05	0.321558	0.307	0.221	0.468492	0
Ubr2	3.19591e-05	0.339425	0.308	0.225	0.470693	0
Adnp	3.21466e-05	0.371066	0.28	0.2	0.473455	0
Gm26510	3.30645e-05	0.307472	0.294	0.208	0.486975	0
Acvr1	3.36179e-05	0.34037	0.303	0.221	0.495124	0
Zfp532	3.38165e-05	0.316675	0.33	0.24	0.498049	0
Baz1b	3.41542e-05	0.387226	0.275	0.198	0.503023	0
Eef1a1	3.67565e-05	0.37642	0.256	0.18	0.541349	0
Ccar1	3.71345e-05	0.316268	0.317	0.23	0.546917	0
Snx18	3.81234e-05	0.343775	0.33	0.246	0.561481	0
Acbd3	3.85052e-05	0.39932	0.259	0.184	0.567104	0
Atp13a3	3.87459e-05	0.352865	0.316	0.232	0.57065	0
Nfam1	3.87554e-05	0.36631	0.252	0.176	0.570789	0
Hps3	3.9737e-05	0.252339	0.472	0.372	0.585247	0
Fam76b	4.17963e-05	0.415166	0.253	0.179	0.615576	0
Prdm2	4.21719e-05	0.367888	0.289	0.209	0.621108	0
Maml1	4.44041e-05	0.28331	0.303	0.218	0.653984	0
Slc10a7	4.44736e-05	0.399334	0.269	0.194	0.655007	0
Ctnnd1	4.56615e-05	0.271067	0.306	0.22	0.672503	0
Gna13	4.75286e-05	0.37642	0.305	0.225	0.700001	0
Zscan26	4.78528e-05	0.276202	0.333	0.245	0.704776	0
Wdr37	4.86475e-05	0.303937	0.318	0.233	0.716481	0
Umad1	4.8783e-05	0.440852	0.268	0.195	0.718476	0
Gm15503	5.01238e-05	0.311272	0.279	0.198	0.738223	0
Abhd15	5.01378e-05	0.27793	0.351	0.263	0.73843	0
Arpc1b	5.09492e-05	0.392405	0.258	0.184	0.75038	0
Mapk1	5.24479e-05	0.404165	0.285	0.208	0.772453	0
Edem1	5.29916e-05	0.362519	0.257	0.181	0.78046	0
Nup98	5.51862e-05	0.301054	0.326	0.241	0.812782	0
Gnai2	5.54683e-05	0.355161	0.263	0.187	0.816938	0
Pxn	5.75856e-05	0.352482	0.265	0.189	0.848121	0
Rsbn1	5.93721e-05	0.324268	0.322	0.238	0.874432	0
Epc1	5.97566e-05	0.264068	0.389	0.298	0.880095	0
Pnn	6.25303e-05	0.282071	0.303	0.219	0.920946	0
Tia1	6.25848e-05	0.301038	0.346	0.26	0.921749	0
Ywhae	6.38684e-05	0.312931	0.324	0.241	0.940654	0
Akap8	6.45869e-05	0.296486	0.28	0.201	0.951235	0
Qrich1	6.71314e-05	0.312694	0.313	0.228	0.988711	0
Supt20	6.73764e-05	0.25049	0.382	0.29	0.992319	0
Samsn1	6.82091e-05	0.37313	0.279	0.203	1	0
Arhgap4	6.82265e-05	0.336619	0.296	0.216	1	0
Ylpm1	7.08224e-05	0.335673	0.273	0.196	1	0
Gm27017	7.55051e-05	0.312479	0.33	0.247	1	0
Capza1	7.89232e-05	0.264369	0.419	0.324	1	0
Bicral	8.0368e-05	0.424739	0.251	0.18	1	0
Pla2g4a	8.14971e-05	0.301989	0.378	0.29	1	0
Tgfb1	8.19971e-05	0.303129	0.329	0.244	1	0
Slc4a7	8.39778e-05	0.377831	0.319	0.24	1	0
Stk38	8.43387e-05	0.253221	0.34	0.254	1	0
Tmem59	8.67139e-05	0.253117	0.367	0.279	1	0
Sarnp	8.96057e-05	0.337531	0.254	0.181	1	0
Ubr1	9.27003e-05	0.264896	0.271	0.194	1	0
Gal3st4	9.4404e-05	0.434247	0.256	0.185	1	0
Usp33	9.91907e-05	0.469177	0.267	0.198	1	0
Arhgef2	0.00010074	0.257775	0.295	0.215	1	0
Pdgfb	0.000116701	0.269504	0.259	0.185	1	0
Irf5	0.000121709	0.253563	0.289	0.209	1	0
Dennd1c	0.000124125	0.330382	0.27	0.198	1	0
Rab3ip	0.000126392	0.305115	0.254	0.181	1	0
Rgl2	0.000126913	0.301232	0.26	0.186	1	0
Smarcad1	0.000128383	0.404764	0.258	0.187	1	0
Asb3	0.000131429	0.284203	0.372	0.288	1	0
Clk4	0.000135339	0.250889	0.376	0.289	1	0
Suclg2	0.000140183	0.264553	0.286	0.209	1	0
Aak1	0.000142882	0.310062	0.326	0.245	1	0
Baz1a	0.000143728	0.293266	0.302	0.225	1	0
Serpine2	0.00015805	0.317349	0.295	0.218	1	0
I830077J02Rik	0.000159555	0.274287	0.274	0.198	1	0
Traf3	0.000173183	0.371818	0.276	0.205	1	0
Atf2	0.000179573	0.349043	0.274	0.202	1	0
Klf3	0.000184111	0.250223	0.353	0.27	1	0
Scaf4	0.000187449	0.350496	0.254	0.185	1	0
Cnot6l	0.000188142	0.309305	0.313	0.235	1	0
Cxxc5	0.000199836	0.368427	0.252	0.184	1	0
March7	0.000200054	0.263526	0.342	0.261	1	0
Fes	0.000200781	0.294394	0.263	0.191	1	0
Ap2b1	0.000200783	0.267318	0.316	0.237	1	0
Zfp106	0.000213047	0.278979	0.294	0.218	1	0
Sppl2a	0.000219267	0.260607	0.313	0.236	1	0
Galnt10	0.000233613	0.346121	0.265	0.196	1	0
Pank2	0.000238457	0.266074	0.268	0.196	1	0
Rprd2	0.000247178	0.302957	0.275	0.204	1	0
Ireb2	0.00026824	0.275198	0.279	0.209	1	0
Lpxn	0.000271906	0.26756	0.338	0.26	1	0
Pald1	0.000272785	0.26468	0.332	0.254	1	0
Tmem170b	0.000280422	0.314743	0.29	0.219	1	0
Fam120a	0.000285227	0.306518	0.258	0.189	1	0
Zfx	0.000290505	0.26973	0.306	0.232	1	0
Gm26916	0.000304451	0.281337	0.269	0.199	1	0
Kcnrg	0.000339214	0.287675	0.294	0.223	1	0
Nt5dc1	0.000348433	0.383457	0.253	0.189	1	0
Supt3	0.000348873	0.27308	0.342	0.264	1	0
Gbf1	0.000361645	0.2571	0.34	0.263	1	0
E130307A14Rik	0.000363519	0.335489	0.264	0.197	1	0
Fxr1	0.000376406	0.26369	0.297	0.223	1	0
Numa1	0.000381392	0.314865	0.27	0.203	1	0
Pik3c2a	0.000394571	0.378108	0.275	0.209	1	0
Rhot1	0.000396941	0.28331	0.257	0.188	1	0
Il15	0.00040209	0.26759	0.251	0.184	1	0
Mbtps2	0.000418867	0.281182	0.263	0.194	1	0
Chd6	0.000421603	0.362899	0.323	0.255	1	0
Dync1i2	0.000421635	0.280708	0.285	0.214	1	0
Pcbp2	0.000433234	0.260096	0.376	0.299	1	0
Kif21b	0.000452606	0.262384	0.313	0.238	1	0
Fut8	0.00049667	0.257969	0.263	0.194	1	0
Hnrnpr	0.000537875	0.31485	0.251	0.187	1	0
Memo1	0.000589969	0.265883	0.334	0.263	1	0
Cox16	0.00074436	0.259978	0.419	0.339	1	0
Xpo7	0.000864057	0.285545	0.313	0.245	1	0
Chd1	0.000908469	0.272697	0.252	0.189	1	0
Rps6kb1	0.00091231	0.271982	0.324	0.254	1	0
Syncrip	0.000952941	0.299252	0.276	0.213	1	0
Gtpbp2	0.000962455	0.292872	0.26	0.197	1	0
Ube3c	0.00104786	0.272741	0.337	0.263	1	0
Traf5	0.00105897	0.308355	0.274	0.21	1	0
Pot1b	0.00113021	0.271067	0.263	0.201	1	0
Bcl9	0.00121405	0.254945	0.259	0.197	1	0
Tmem87a	0.00165977	0.310359	0.253	0.196	1	0
Kif5b	0.00174439	0.260942	0.264	0.204	1	0
Tardbp	0.00321714	0.257583	0.275	0.218	1	0
Sgms1	0.00893716	0.250889	0.263	0.212	1	0
Csmd3	3.72883e-46	0.729421	0.986	0.899	5.49183e-42	1
Plxdc2	1.84305e-32	0.458702	1	0.976	2.71444e-28	1
Numb	2.62826e-29	0.687304	0.871	0.74	3.87091e-25	1
Cst3	1.72083e-27	0.552576	0.998	0.979	2.53444e-23	1
Elmo1	4.28547e-26	0.382516	0.998	0.99	6.31165e-22	1
Selplg	3.15226e-23	0.634605	0.827	0.711	4.64264e-19	1
Nav2	1.78751e-21	0.418469	0.991	0.923	2.63265e-17	1
Nav3	1.48859e-20	0.481699	0.962	0.853	2.1924e-16	1
Gm35188	2.05284e-20	0.57262	0.921	0.808	3.02342e-16	1
Rapgef5	2.21233e-19	0.564556	0.853	0.76	3.25831e-15	1
Maml3	4.60721e-16	0.412546	0.916	0.83	6.7855e-12	1
Arhgap5	1.23276e-15	0.565511	0.791	0.705	1.81561e-11	1
Slc8a1	2.58071e-14	0.341734	0.984	0.931	3.80086e-10	1
Zfp710	6.68094e-14	0.532863	0.766	0.686	9.83969e-10	1
Tgfbr1	1.40884e-13	0.303892	0.988	0.955	2.07494e-09	1
Gm46367	1.91002e-13	0.722406	0.583	0.478	2.81308e-09	1
Srgap2	4.25184e-13	0.27309	0.997	0.985	6.26211e-09	1
Ivns1abp	5.51913e-13	0.354699	0.93	0.862	8.12858e-09	1
Zfhx3	4.31703e-11	0.28411	0.986	0.965	6.35812e-07	1
Hexb	2.67065e-10	0.262342	0.997	0.978	3.93334e-06	1
Macf1	3.10113e-09	0.285956	0.928	0.893	4.56734e-05	1
Cx3cr1	1.91456e-08	0.28296	0.906	0.85	0.000281977	1
Dip2b	2.05015e-08	0.316044	0.845	0.812	0.000301946	1
Gm32036	2.54486e-08	0.643883	0.546	0.467	0.000374807	1
Apbb1ip	1.2466e-07	0.334584	0.843	0.798	0.001836	1
Mef2c	2.76217e-07	0.28712	0.939	0.924	0.00406812	1
Gpr34	2.85196e-07	0.45699	0.712	0.666	0.00420037	1
Ifitm10	4.30928e-06	0.533324	0.541	0.485	0.063467	1
P2ry12	5.46663e-06	0.290308	0.88	0.832	0.0805126	1
Large1	6.59422e-06	0.33577	0.7	0.645	0.0971197	1
Picalm	7.93243e-06	0.272689	0.897	0.843	0.116829	1
Fhit	8.68986e-06	0.445748	0.553	0.482	0.127984	1
Gm31243	5.3253e-05	0.578104	0.346	0.271	0.78431	1
Zcchc7	6.81607e-05	0.30951	0.716	0.681	1	1
Bank1	0.00025391	0.494131	0.412	0.354	1	1
Fchsd2	0.000350533	0.261071	0.881	0.837	1	1
Fgf13	0.000398682	0.442666	0.435	0.371	1	1
Slc24a3	0.000535167	0.410015	0.494	0.444	1	1
Anks1b	0.00144672	0.274019	0.639	0.585	1	1
Agmo	0.00611254	0.251663	0.742	0.725	1	1
8030442B05Rik	0.00699301	0.282884	0.539	0.517	1	1
0610040J01Rik	0.00877384	0.282157	0.579	0.597	1	1
C1qa	5.00075e-28	0.576061	0.957	0.886	7.3651e-24	2
C1qc	2.36432e-23	0.52215	0.948	0.909	3.48217e-19	2
Ctsd	1.1944e-20	0.650213	0.804	0.708	1.75912e-16	2
C1qb	2.07131e-20	0.538615	0.9	0.844	3.05062e-16	2
Itm2b	1.88052e-18	0.507	0.928	0.857	2.76963e-14	2
Ctss	5.15774e-16	0.406296	0.967	0.911	7.59633e-12	2
Cst31	1.64719e-14	0.319212	0.996	0.98	2.42599e-10	2
AC149090.1	8.25846e-14	0.41924	0.907	0.866	1.21631e-09	2
Ctsl1	5.05375e-11	0.786338	0.578	0.48	7.44316e-07	2
Arhgap45	6.24025e-11	0.438841	0.824	0.814	9.19064e-07	2
Ctsz1	1.41684e-10	0.623523	0.594	0.493	2.08672e-06	2
Anks1b1	1.92611e-10	0.522243	0.676	0.576	2.83677e-06	2
Ddx5	2.00624e-06	0.282761	0.95	0.937	0.0295478	2
Psap	2.25533e-06	0.485098	0.639	0.622	0.0332165	2
Lgmn	5.25328e-06	0.27859	0.894	0.877	0.0773704	2
Atp6v0b	1.4837e-05	0.351167	0.728	0.718	0.21852	2
Ptprc1	1.70192e-05	0.26136	0.852	0.824	0.250659	2
Gm22451	2.47958e-05	0.431138	0.659	0.64	0.365192	2
Cd81	7.33907e-05	0.390237	0.656	0.625	1	2
H2-D11	0.000252381	0.571076	0.396	0.331	1	2
Fau	0.000292662	0.662142	0.278	0.212	1	2
Sat11	0.000414169	0.397797	0.606	0.585	1	2
H2-K11	0.000570708	0.511293	0.378	0.318	1	2
E330020D12Rik	0.00108615	0.385587	0.469	0.41	1	2
Man2b11	0.00206532	0.399022	0.489	0.441	1	2
5330438D12Rik	0.00330131	0.283066	0.731	0.751	1	2
Rsrp1	0.00372038	0.256375	0.756	0.784	1	2
Ctsh1	0.00492659	0.392443	0.55	0.529	1	2
Cd331	0.00976236	0.3115	0.576	0.559	1	2
Elmo11	1.7454e-34	0.624052	1	0.991	2.57063e-30	3
Tgfbr11	2.32184e-30	0.756571	0.996	0.96	3.41961e-26	3
Plxdc21	4.24027e-30	0.555538	1	0.98	6.24507e-26	3
Csmd31	9.07667e-28	0.826194	0.982	0.913	1.33681e-23	3
Nav31	1.94619e-27	0.833405	0.969	0.87	2.86635e-23	3
Maml31	1.61813e-26	0.74202	0.978	0.838	2.38319e-22	3
Prkca	1.7797e-23	0.905667	0.825	0.53	2.62115e-19	3
Slc24a31	7.41286e-23	1.04608	0.744	0.426	1.09177e-18	3
Ank21	1.98303e-22	1.02624	0.722	0.407	2.92061e-18	3
Slc8a11	4.43625e-21	0.601861	1	0.938	6.53371e-17	3
Exoc6b1	2.44918e-20	1.13156	0.623	0.324	3.60715e-16	3
Nav21	2.94897e-20	0.612338	0.996	0.933	4.34324e-16	3
8030442B05Rik1	4.32151e-20	0.874526	0.807	0.493	6.36472e-16	3
Nos1ap	6.29211e-20	1.20221	0.543	0.26	9.26701e-16	3
Fam102b	2.48713e-19	0.929507	0.713	0.403	3.66305e-15	3
Srgap21	2.69806e-19	0.495086	0.996	0.987	3.97371e-15	3
Itga91	8.48838e-19	0.986812	0.641	0.343	1.25017e-14	3
Gphn1	8.50904e-19	1.15346	0.547	0.273	1.25321e-14	3
Ankib1	9.02182e-19	1.4345	0.399	0.163	1.32873e-14	3
Oxr1	1.44139e-18	1.16094	0.65	0.369	2.12289e-14	3
Bbs9	2.04518e-18	0.900642	0.74	0.457	3.01215e-14	3
Bank11	2.58802e-18	1.02126	0.641	0.34	3.81163e-14	3
Large11	9.90489e-18	0.711322	0.861	0.637	1.45879e-13	3
Gm42581	4.53868e-17	1.1195	0.583	0.323	6.68457e-13	3
Fhit1	5.16062e-17	0.977494	0.731	0.475	7.60056e-13	3
Myo18b	7.06028e-17	1.59014	0.296	0.105	1.03984e-12	3
Mir99ahg	4.45118e-16	0.546959	0.987	0.917	6.5557e-12	3
E2f3	5.16086e-16	0.855859	0.556	0.279	7.60092e-12	3
Mast4	6.04752e-16	1.61495	0.256	0.085	8.90679e-12	3
Vxn	1.08953e-15	1.21433	0.395	0.172	1.60466e-11	3
Gmds	4.08169e-15	1.45006	0.3	0.114	6.01151e-11	3
Numb1	6.21161e-15	0.629784	0.915	0.756	9.14847e-11	3
Stambpl1	7.62437e-15	1.05656	0.489	0.25	1.12292e-10	3
Nbea1	3.55343e-14	1.1084	0.507	0.276	5.23349e-10	3
Prkn1	3.64889e-14	0.753502	0.834	0.614	5.37409e-10	3
Trim21	4.21618e-14	1.4089	0.372	0.174	6.20959e-10	3
Slc2a5	4.42687e-14	1.15163	0.359	0.157	6.51989e-10	3
Cmss11	4.46856e-14	1.09061	0.534	0.295	6.5813e-10	3
Cables11	6.13266e-14	1.06169	0.493	0.257	9.03218e-10	3
Plxna41	6.73668e-14	0.697857	0.816	0.554	9.92178e-10	3
Apbb21	9.63307e-14	1.0338	0.453	0.227	1.41876e-09	3
Akap91	1.79002e-13	1.09248	0.422	0.207	2.63634e-09	3
Rab6b	4.05548e-13	1.26298	0.327	0.142	5.97291e-09	3
Nrros	4.39407e-13	0.860113	0.552	0.3	6.47159e-09	3
Lrba	6.54834e-13	0.911675	0.587	0.359	9.64439e-09	3
Braf1	8.17538e-13	1.00277	0.462	0.243	1.20407e-08	3
Mctp1	1.11776e-12	0.826278	0.753	0.524	1.64623e-08	3
AW554918	1.22208e-12	0.990659	0.493	0.273	1.79988e-08	3
Pdlim5	1.29713e-12	1.04329	0.435	0.223	1.91041e-08	3
Ldlrad4	1.55862e-12	0.448455	0.978	0.961	2.29553e-08	3
Nr3c21	1.81323e-12	1.34419	0.386	0.195	2.67052e-08	3
4933406F09Rik	2.61031e-12	1.26893	0.251	0.095	3.84446e-08	3
Rasgrp3	4.64904e-12	0.601368	0.749	0.495	6.8471e-08	3
Kcnk131	4.86949e-12	0.873101	0.574	0.357	7.17179e-08	3
Hivep3	4.99233e-12	0.591359	0.785	0.529	7.3527e-08	3
Tanc2	6.05199e-12	0.295839	0.996	0.99	8.91337e-08	3
Myo1d	1.01374e-11	1.00264	0.35	0.162	1.49304e-07	3
Ehmt1	1.06542e-11	0.804575	0.507	0.282	1.56915e-07	3
0610040J01Rik1	1.56099e-11	0.636373	0.812	0.571	2.29902e-07	3
Tjp11	1.61459e-11	0.815742	0.587	0.366	2.37797e-07	3
2610203C22Rik	1.72509e-11	0.827131	0.587	0.363	2.54071e-07	3
Camta1	2.2481e-11	1.29648	0.283	0.122	3.311e-07	3
Rtn4rl11	2.45724e-11	0.748697	0.578	0.344	3.61902e-07	3
Pak11	2.45981e-11	1.06712	0.368	0.182	3.62281e-07	3
Inpp4b	2.84474e-11	0.548459	0.942	0.855	4.18973e-07	3
Dlc11	3.20282e-11	1.13212	0.413	0.219	4.71712e-07	3
Gm40841	4.10319e-11	1.03918	0.408	0.212	6.04318e-07	3
Mapkap1	5.38984e-11	0.846521	0.489	0.272	7.93816e-07	3
Dip2c1	5.76559e-11	0.896145	0.493	0.284	8.49156e-07	3
Ubr31	6.77312e-11	0.750201	0.538	0.317	9.97545e-07	3
Ralgps11	7.59115e-11	1.01035	0.381	0.196	1.11803e-06	3
Brwd11	8.59861e-11	0.883762	0.413	0.216	1.2664e-06	3
Pde3b	1.06154e-10	0.428488	0.973	0.928	1.56344e-06	3
Cdk6	1.1712e-10	0.792246	0.48	0.268	1.72494e-06	3
Rtn1	1.31198e-10	0.794201	0.596	0.386	1.93229e-06	3
Pwwp2a	1.40071e-10	0.637624	0.695	0.483	2.06296e-06	3
Mgll1	1.49109e-10	1.13428	0.377	0.199	2.19608e-06	3
Pik3r51	1.62915e-10	0.834051	0.498	0.28	2.39941e-06	3
Arhgef121	1.79804e-10	0.930932	0.386	0.198	2.64816e-06	3
Rapgef51	1.8501e-10	0.446448	0.951	0.765	2.72482e-06	3
Ets1	2.00604e-10	1.07837	0.395	0.214	2.9545e-06	3
Rhob	2.02554e-10	1.07916	0.296	0.134	2.98321e-06	3
Chst8	2.05724e-10	1.46943	0.251	0.108	3.0299e-06	3
Gm47664	2.22502e-10	1.01863	0.359	0.18	3.27701e-06	3
Klf121	2.22851e-10	0.681972	0.717	0.505	3.28216e-06	3
Agmo1	2.32185e-10	0.528739	0.874	0.714	3.41962e-06	3
Igf1r1	2.59256e-10	0.626587	0.552	0.325	3.81833e-06	3
Crybb1	3.03473e-10	0.914774	0.332	0.16	4.46955e-06	3
Arid2	3.48053e-10	0.631666	0.543	0.308	5.12612e-06	3
Morc2a	3.78071e-10	1.22428	0.26	0.114	5.56823e-06	3
9130015G15Rik	4.02253e-10	0.873624	0.426	0.236	5.92439e-06	3
Pard3b	4.20369e-10	0.613162	0.601	0.371	6.1912e-06	3
Peak1	4.37564e-10	0.836205	0.507	0.307	6.44445e-06	3
Slc7a8	4.39879e-10	0.54738	0.704	0.454	6.47853e-06	3
Arhgap51	4.5607e-10	0.492873	0.892	0.708	6.71699e-06	3
Ifitm101	5.05562e-10	0.532557	0.722	0.476	7.44592e-06	3
Mras	5.14098e-10	1.11193	0.265	0.116	7.57163e-06	3
Gm26936	5.38923e-10	0.949122	0.372	0.195	7.93726e-06	3
Kcnq1ot1	6.50565e-10	1.1577	0.323	0.16	9.58152e-06	3
Sp4	8.07544e-10	1.37733	0.251	0.113	1.18935e-05	3
Ylpm11	8.59361e-10	0.956642	0.381	0.206	1.26567e-05	3
Zfp182	8.99811e-10	0.777549	0.444	0.249	1.32524e-05	3
D5Ertd579e	9.64817e-10	0.988314	0.327	0.16	1.42098e-05	3
Aig1	1.10465e-09	1.28313	0.296	0.145	1.62693e-05	3
Cryl1	1.10474e-09	0.885358	0.422	0.234	1.62706e-05	3
Asb31	1.10573e-09	0.723919	0.502	0.297	1.62853e-05	3
Qk	1.22414e-09	0.375062	0.978	0.963	1.80292e-05	3
Map4k5	1.23467e-09	0.978441	0.332	0.166	1.81842e-05	3
Ehbp1	1.49639e-09	1.21617	0.269	0.125	2.20389e-05	3
Zfp7101	1.72216e-09	0.509257	0.865	0.688	2.5364e-05	3
Tmem119	1.78848e-09	0.627765	0.511	0.301	2.63408e-05	3
Cdkal1	1.96212e-09	0.765326	0.552	0.343	2.88982e-05	3
Dlg11	2.14877e-09	0.934578	0.404	0.228	3.16471e-05	3
Immp2l	2.20876e-09	1.05052	0.466	0.29	3.25307e-05	3
Cox161	2.3154e-09	0.780312	0.538	0.348	3.41012e-05	3
Lifr	3.10078e-09	0.851282	0.381	0.204	4.56683e-05	3
Tiam1	3.97798e-09	1.1505	0.287	0.139	5.85877e-05	3
Loxl2	4.07202e-09	0.797002	0.377	0.203	5.99728e-05	3
Atrn	4.16473e-09	0.992572	0.291	0.14	6.13382e-05	3
Asxl1	4.22259e-09	0.675432	0.538	0.335	6.21903e-05	3
Cdh111	5.00127e-09	0.542808	0.709	0.507	7.36586e-05	3
9930021J03Rik	6.08022e-09	0.743971	0.484	0.294	8.95495e-05	3
Selplg1	6.42488e-09	0.424615	0.915	0.721	9.46256e-05	3
Plcl2	7.58242e-09	0.429508	0.915	0.784	0.000111674	3
Arih11	7.74408e-09	0.628235	0.632	0.433	0.000114055	3
R3hdm11	8.0084e-09	0.828075	0.457	0.275	0.000117948	3
Pag1	8.68728e-09	0.347203	0.991	0.931	0.000127946	3
Gm11146	8.79449e-09	1.11664	0.274	0.132	0.000129525	3
Trim441	8.99808e-09	0.810125	0.408	0.23	0.000132524	3
Chn2	9.18505e-09	0.510069	0.852	0.686	0.000135277	3
Cdc37l1	9.53539e-09	1.06886	0.269	0.128	0.000140437	3
Pten	9.58703e-09	0.577304	0.704	0.499	0.000141198	3
Spata5	1.0147e-08	0.952662	0.327	0.17	0.000149445	3
Atp11c	1.02915e-08	0.819335	0.435	0.258	0.000151573	3
Smyd3	1.04834e-08	0.613119	0.691	0.497	0.000154399	3
Fbxl5	1.08674e-08	1.08328	0.283	0.138	0.000160055	3
Nfia	1.30786e-08	0.487143	0.87	0.719	0.000192621	3
3222401L13Rik	1.39607e-08	0.888014	0.305	0.152	0.000205613	3
Trappc9	1.67854e-08	0.731974	0.466	0.278	0.000247215	3
Cacnb2	1.77651e-08	0.673316	0.758	0.588	0.000261645	3
Apc1	2.00479e-08	0.658178	0.565	0.365	0.000295265	3
St3gal6	2.33389e-08	0.492943	0.803	0.598	0.000343736	3
Vsir	2.33896e-08	0.486862	0.753	0.542	0.000344483	3
Fut81	2.39342e-08	0.944351	0.359	0.203	0.000352503	3
Armh3	2.39474e-08	0.716603	0.466	0.283	0.000352697	3
Hnrnpu1	2.43206e-08	0.676695	0.475	0.29	0.000358194	3
Ecscr	2.70024e-08	0.885892	0.305	0.156	0.000397691	3
Ppp2r3a	2.78649e-08	1.04636	0.256	0.122	0.000410394	3
Ppm1l1	2.80349e-08	0.799781	0.408	0.239	0.000412898	3
Rin31	2.98308e-08	0.801542	0.422	0.25	0.000439348	3
Zfhx31	2.99422e-08	0.29035	0.996	0.968	0.000440988	3
Snd1	3.44503e-08	0.611863	0.552	0.356	0.000507384	3
Ptgs1	3.60519e-08	0.513256	0.614	0.399	0.000530973	3
Med12l	3.65802e-08	0.425083	0.839	0.645	0.000538754	3
Sbf2	3.8112e-08	0.4839	0.744	0.531	0.000561313	3
Rcsd11	3.93225e-08	0.548453	0.596	0.386	0.000579142	3
Impact	4.10912e-08	0.877172	0.305	0.157	0.000605192	3
Apbb1ip1	4.13625e-08	0.353758	0.946	0.795	0.000609187	3
Wdfy3	4.48088e-08	0.538871	0.704	0.503	0.000659944	3
Rprd1a	5.06317e-08	1.03281	0.291	0.152	0.000745703	3
Pnn1	5.27251e-08	0.760763	0.399	0.232	0.000776535	3
Smurf11	5.30785e-08	0.821722	0.404	0.24	0.00078174	3
Cask	5.61893e-08	0.556961	0.668	0.483	0.000827557	3
Frmd4a	5.66011e-08	0.334193	0.969	0.905	0.000833621	3
Fcrls	5.70598e-08	0.502604	0.78	0.569	0.000840377	3
Dock7	5.81774e-08	0.754842	0.43	0.26	0.000856836	3
Pbx11	6.39258e-08	0.976708	0.336	0.188	0.000941499	3
Abcb4	6.55449e-08	1.01354	0.287	0.149	0.000965346	3
Rasal21	6.80377e-08	0.75731	0.466	0.297	0.00100206	3
Med131	6.83662e-08	0.65673	0.511	0.328	0.0010069	3
Zeb11	6.96551e-08	0.636729	0.726	0.566	0.00102588	3
Usp321	7.09188e-08	0.816243	0.359	0.201	0.00104449	3
Plxdc11	8.19116e-08	0.617231	0.435	0.259	0.00120639	3
Acvr2a	8.43374e-08	0.887156	0.323	0.172	0.00124212	3
Mtss1	8.76579e-08	0.817719	0.39	0.23	0.00129103	3
Smg6	9.49146e-08	0.599954	0.628	0.448	0.0013979	3
Kcnk6	9.85536e-08	0.837002	0.318	0.171	0.0014515	3
Rlf1	1.00551e-07	0.693261	0.413	0.245	0.00148092	3
Lrp51	1.1054e-07	0.716983	0.417	0.25	0.00162803	3
Tcf121	1.14562e-07	0.588706	0.646	0.476	0.00168727	3
Ppp6r3	1.18547e-07	0.596804	0.511	0.329	0.00174595	3
Pspc1	1.20455e-07	0.803046	0.381	0.222	0.00177407	3
Suclg21	1.2364e-07	0.935828	0.368	0.222	0.00182097	3
Otud7b	1.26195e-07	1.02353	0.265	0.134	0.0018586	3
Prkce	1.30552e-07	0.638147	0.619	0.427	0.00192277	3
Zbtb201	1.36581e-07	0.450062	0.857	0.747	0.00201157	3
Nrip1	1.39492e-07	0.402082	0.807	0.597	0.00205444	3
Elavl1	1.43606e-07	0.897521	0.314	0.17	0.00211503	3
Ube2e3	1.46617e-07	0.867773	0.278	0.142	0.00215938	3
Zyg11b1	1.62316e-07	0.685541	0.439	0.27	0.0023906	3
Tnrc6a1	1.67579e-07	0.718878	0.52	0.35	0.0024681	3
Arap3	1.68878e-07	0.859904	0.318	0.173	0.00248723	3
Klf7	1.7109e-07	0.928566	0.296	0.159	0.00251982	3
Pcca1	1.74758e-07	0.942033	0.363	0.218	0.00257384	3
Susd3	1.76709e-07	0.735501	0.408	0.245	0.00260257	3
Gm320361	1.77351e-07	0.435085	0.668	0.467	0.00261203	3
Nr3c1	1.82506e-07	0.619277	0.547	0.367	0.00268794	3
Ncor1	1.8524e-07	0.517266	0.641	0.449	0.00272822	3
Rffl1	1.85761e-07	0.562255	0.52	0.335	0.00273589	3
Adcy91	1.87929e-07	0.781994	0.39	0.234	0.00276782	3
Cd531	1.90431e-07	0.727364	0.404	0.239	0.00280466	3
Sltm	1.92307e-07	0.688574	0.471	0.301	0.00283229	3
Epc21	1.96617e-07	0.695395	0.413	0.247	0.00289578	3
Wasf2	2.11023e-07	0.468766	0.78	0.609	0.00310795	3
Ttc71	2.1238e-07	0.655588	0.395	0.23	0.00312793	3
Ptprm	2.18071e-07	0.54086	0.646	0.452	0.00321175	3
Smap2	2.25345e-07	0.46957	0.762	0.574	0.00331889	3
Gm34280	2.32662e-07	0.829925	0.327	0.182	0.00342664	3
Ttc3	2.38134e-07	0.918493	0.291	0.154	0.00350724	3
Golm1	2.45233e-07	0.482893	0.641	0.449	0.0036118	3
Gm43221	2.50711e-07	0.81917	0.372	0.22	0.00369247	3
Man1a1	2.58135e-07	0.384989	0.731	0.506	0.00380181	3
Pacsin2	2.58999e-07	0.609431	0.475	0.302	0.00381454	3
Lactb2	2.59042e-07	0.882173	0.305	0.165	0.00381518	3
Vps37a	2.609e-07	1.02353	0.256	0.13	0.00384253	3
Ube3a1	2.6326e-07	0.566513	0.538	0.352	0.0038773	3
Scaper1	2.72112e-07	0.595891	0.516	0.332	0.00400766	3
Whrn	2.88491e-07	0.580137	0.484	0.311	0.00424889	3
Gtf2h2	3.20879e-07	0.452882	0.682	0.502	0.00472591	3
Klf31	3.42732e-07	0.664126	0.453	0.282	0.00504775	3
Baz2b1	3.43409e-07	0.417975	0.717	0.506	0.00505772	3
Prpf39	3.64106e-07	0.66673	0.408	0.246	0.00536255	3
E130307A14Rik1	3.76645e-07	0.846336	0.354	0.206	0.00554723	3
Cttnbp2nl1	3.79749e-07	0.436924	0.744	0.551	0.00559294	3
Adgrl2	4.05189e-07	0.908697	0.278	0.147	0.00596762	3
Hdac81	4.2627e-07	0.686034	0.475	0.307	0.0062781	3
Gm3488	4.27996e-07	0.894246	0.269	0.14	0.00630352	3
Rock1	4.32269e-07	0.565396	0.583	0.401	0.00636646	3
1810026B05Rik	4.32479e-07	0.776836	0.318	0.177	0.00636956	3
Canx	4.34933e-07	0.582404	0.489	0.315	0.00640569	3
Sgce1	4.41473e-07	0.692109	0.368	0.213	0.00650202	3
Map2k41	4.48012e-07	0.796104	0.336	0.19	0.00659832	3
Dapp1	4.59349e-07	0.42058	0.695	0.488	0.00676529	3
Bicral1	4.92107e-07	0.765731	0.336	0.191	0.00724775	3
Arl15	5.25487e-07	0.53091	0.673	0.521	0.00773937	3
Sh3pxd2a1	5.27915e-07	0.589086	0.502	0.325	0.00777513	3
Cdc42bpb	5.45091e-07	0.94847	0.274	0.146	0.0080281	3
Gng21	5.45435e-07	0.482877	0.637	0.433	0.00803316	3
Pcmtd11	5.51037e-07	0.582548	0.502	0.333	0.00811567	3
Zfp6081	5.82973e-07	0.61265	0.471	0.302	0.00858602	3
Ppp2r2a	6.12574e-07	0.911524	0.3	0.166	0.00902199	3
Ccnt1	6.78371e-07	0.838235	0.305	0.17	0.00999104	3
Msi21	6.88235e-07	0.620105	0.484	0.312	0.0101363	3
Appbp2	6.90764e-07	0.956173	0.26	0.136	0.0101736	3
Fto1	7.17754e-07	0.615399	0.493	0.322	0.0105711	3
Zfp236	7.23096e-07	0.787461	0.3	0.163	0.0106498	3
Tulp41	7.38566e-07	0.685659	0.408	0.259	0.0108776	3
Jam2	7.50626e-07	0.926161	0.269	0.141	0.0110552	3
Gm47283	7.50777e-07	0.913904	0.314	0.179	0.0110574	3
Csnk1e1	7.64155e-07	0.761243	0.372	0.222	0.0112545	3
Plcl11	7.91758e-07	0.308421	0.973	0.93	0.011661	3
Traf51	8.03968e-07	0.711061	0.368	0.218	0.0118408	3
Disc1	8.13439e-07	0.844857	0.399	0.255	0.0119803	3
Zfp652	8.57273e-07	0.480871	0.758	0.61	0.0126259	3
Myl12b	8.76078e-07	0.724684	0.332	0.188	0.0129029	3
Scaf8	8.93952e-07	0.57607	0.462	0.295	0.0131661	3
Tmem245	9.00835e-07	0.596436	0.399	0.24	0.0132675	3
Hmg20a1	9.15246e-07	0.717995	0.395	0.245	0.0134797	3
Rab3ip1	9.37243e-07	0.7016	0.336	0.193	0.0138037	3
Rab391	9.52393e-07	0.786992	0.323	0.184	0.0140268	3
Cxxc51	9.56147e-07	0.759481	0.336	0.194	0.0140821	3
Chd9	9.62971e-07	0.279094	0.973	0.932	0.0141826	3
Sncaip1	9.7608e-07	0.789828	0.354	0.21	0.0143757	3
Pik3c2a1	9.95737e-07	0.739075	0.368	0.218	0.0146652	3
Abcc51	9.99782e-07	0.743595	0.408	0.257	0.0147248	3
Ipo7	1.05083e-06	0.844154	0.256	0.132	0.0154767	3
Ncoa61	1.07081e-06	0.843433	0.318	0.183	0.0157709	3
Ppp1r12b	1.07719e-06	0.916339	0.314	0.179	0.0158649	3
Ube2d2a	1.19589e-06	0.618053	0.435	0.277	0.0176131	3
Cx3cr11	1.2043e-06	0.337591	0.924	0.858	0.0177369	3
Tbc1d22a1	1.21523e-06	0.43046	0.655	0.459	0.0178979	3
Arhgap12	1.26733e-06	0.400734	0.74	0.532	0.0186653	3
Add11	1.32752e-06	0.873869	0.296	0.167	0.0195518	3
P3h21	1.36123e-06	0.424992	0.848	0.688	0.0200483	3
Cdc73	1.36705e-06	0.910187	0.287	0.16	0.020134	3
Macf11	1.37343e-06	0.326765	0.937	0.898	0.0202279	3
Pla2g4a1	1.40911e-06	0.454743	0.48	0.303	0.0207534	3
Cds11	1.41448e-06	0.705015	0.444	0.291	0.0208324	3
Fat31	1.42527e-06	0.531867	0.547	0.39	0.0209914	3
Sparc	1.43414e-06	0.350246	0.744	0.525	0.021122	3
Sppl31	1.45052e-06	0.466771	0.61	0.42	0.0213633	3
Fubp1	1.49848e-06	0.560978	0.484	0.317	0.0220696	3
Chst11	1.52005e-06	0.890303	0.3	0.171	0.0223874	3
Klhl71	1.52475e-06	0.797627	0.305	0.174	0.0224565	3
Copa1	1.59596e-06	0.713235	0.327	0.188	0.0235053	3
Slc16a7	1.62407e-06	0.734022	0.35	0.208	0.0239193	3
Ppp4r2	1.64365e-06	0.738295	0.291	0.16	0.0242077	3
Tcerg1	1.66781e-06	0.960633	0.265	0.144	0.0245635	3
Chd61	1.73493e-06	0.604739	0.426	0.263	0.0255521	3
Dtx41	1.83537e-06	0.677147	0.318	0.18	0.0270314	3
4732471J01Rik	2.18425e-06	0.66176	0.417	0.267	0.0321697	3
Tmem1351	2.2913e-06	0.382608	0.803	0.592	0.0337463	3
Faf11	2.31159e-06	0.617813	0.444	0.291	0.0340451	3
Sgms11	2.34921e-06	0.6759	0.359	0.216	0.0345992	3
Bod1l1	2.48346e-06	0.76701	0.341	0.204	0.0365763	3
Zranb21	2.50391e-06	0.891262	0.323	0.196	0.0368776	3
Zc3h13	2.56708e-06	0.811225	0.305	0.175	0.037808	3
Gm312431	2.61074e-06	0.649296	0.43	0.274	0.038451	3
Mpp6	2.66414e-06	0.862537	0.287	0.164	0.0392375	3
Vapa	2.67183e-06	0.659907	0.395	0.245	0.0393508	3
Basp1	2.74373e-06	0.519793	0.556	0.394	0.0404096	3
Siglech	2.79829e-06	0.324319	0.928	0.822	0.0412132	3
Aatf1	2.87443e-06	0.725317	0.332	0.198	0.0423346	3
Klhl18	2.95991e-06	0.823389	0.269	0.147	0.0435935	3
Slco2b1	3.03096e-06	0.384393	0.879	0.772	0.0446399	3
Itpkb	3.04358e-06	0.718136	0.381	0.238	0.0448259	3
Arsb	3.16243e-06	0.620179	0.552	0.391	0.0465763	3
Reps1	3.20842e-06	0.934964	0.269	0.15	0.0472536	3
Cdk14	3.25391e-06	0.504104	0.498	0.333	0.0479236	3
Cab39	3.36193e-06	0.670814	0.323	0.188	0.0495145	3
Cdyl	3.50885e-06	0.864205	0.291	0.165	0.0516783	3
Eif4g1	3.51247e-06	0.77834	0.296	0.169	0.0517316	3
Dock11	3.52262e-06	0.521028	0.471	0.308	0.0518811	3
Glul	3.57329e-06	0.666786	0.399	0.252	0.0526274	3
Rfx31	3.57451e-06	0.664928	0.395	0.251	0.0526453	3
Gigyf2	3.61441e-06	0.668434	0.439	0.286	0.0532331	3
Rere	3.71605e-06	0.357608	0.852	0.668	0.05473	3
Cop11	3.71682e-06	0.567339	0.457	0.298	0.0547413	3
Gm463671	3.76131e-06	0.376061	0.686	0.484	0.0553966	3
Helz	3.78917e-06	0.479208	0.457	0.29	0.0558069	3
Cep350	3.80054e-06	0.54911	0.493	0.331	0.0559743	3
Yes11	3.89101e-06	0.767918	0.363	0.227	0.0573068	3
Sik2	3.95806e-06	0.547023	0.543	0.38	0.0582943	3
Gm26542	4.04577e-06	0.456571	0.641	0.467	0.059586	3
Nktr1	4.10564e-06	0.56145	0.525	0.36	0.0604679	3
Mecp2	4.30684e-06	0.780027	0.386	0.246	0.0634311	3
Fry1	4.37856e-06	0.666152	0.422	0.277	0.0644874	3
Cwc27	4.5095e-06	1.03613	0.278	0.161	0.0664159	3
Ube3c1	4.63757e-06	0.622343	0.422	0.274	0.0683022	3
Atf21	4.64093e-06	0.696494	0.35	0.214	0.0683516	3
Prkd3	4.74404e-06	0.739889	0.278	0.154	0.0698703	3
Mapk8	4.76088e-06	0.807395	0.256	0.139	0.0701182	3
Trit1	4.7767e-06	0.835902	0.274	0.155	0.0703512	3
Chchd31	4.77722e-06	0.685659	0.377	0.234	0.0703588	3
Smad31	4.78346e-06	0.611254	0.453	0.301	0.0704508	3
Map2k1	5.04528e-06	0.424554	0.439	0.271	0.0743069	3
Maml11	5.24611e-06	0.682407	0.372	0.234	0.0772648	3
Ube2g11	5.32493e-06	0.720637	0.314	0.184	0.0784256	3
Gab11	5.33393e-06	0.54808	0.525	0.364	0.0785582	3
Rab3il1	5.39816e-06	0.633013	0.345	0.205	0.0795041	3
Kif21b1	5.5617e-06	0.635964	0.39	0.25	0.0819127	3
Arih21	5.59388e-06	0.630517	0.377	0.23	0.0823867	3
Fndc3a	5.6881e-06	0.481922	0.507	0.339	0.0837744	3
Tmem2731	5.7019e-06	0.644878	0.435	0.29	0.0839776	3
Abca9	5.78085e-06	0.359535	0.762	0.597	0.0851404	3
Scamp1	5.86667e-06	0.861541	0.287	0.166	0.0864043	3
Prdm21	5.87433e-06	0.568334	0.368	0.222	0.0865171	3
Cdk191	5.90936e-06	0.550904	0.583	0.424	0.0870331	3
Phf121	5.96027e-06	0.607624	0.381	0.237	0.0877829	3
Fam172a	5.97938e-06	0.410062	0.758	0.618	0.0880643	3
Huwe11	6.03927e-06	0.500231	0.525	0.365	0.0889463	3
Tns31	6.05683e-06	0.369025	0.749	0.558	0.089205	3
Tbl1xr1	6.14612e-06	0.401677	0.628	0.446	0.09052	3
Dnajc1	6.17143e-06	0.521966	0.52	0.369	0.0908929	3
Babam21	6.21919e-06	0.504409	0.57	0.402	0.0915963	3
Epc11	6.42122e-06	0.626312	0.466	0.315	0.0945718	3
A930015D03Rik	6.44688e-06	0.577272	0.377	0.231	0.0949497	3
Atp2c11	6.551e-06	0.492383	0.574	0.415	0.0964831	3
Entpd11	6.82361e-06	0.324975	0.901	0.807	0.100498	3
Txndc11	6.82825e-06	0.675128	0.336	0.202	0.100566	3
Narf	6.86516e-06	0.884464	0.278	0.16	0.10111	3
Zdhhc201	6.87335e-06	0.652434	0.422	0.276	0.101231	3
Clip11	6.87382e-06	0.597577	0.381	0.239	0.101238	3
P4ha1	6.89781e-06	0.488032	0.511	0.348	0.101591	3
Cep68	6.89822e-06	0.479208	0.417	0.261	0.101597	3
Sos1	6.92893e-06	0.883335	0.256	0.142	0.102049	3
Ddx171	7.00449e-06	0.432971	0.605	0.433	0.103162	3
Rsrc1	7.24185e-06	0.469817	0.529	0.365	0.106658	3
Evi5	7.36461e-06	0.635511	0.413	0.269	0.108466	3
Tlr71	7.50314e-06	0.527396	0.529	0.371	0.110506	3
Maml2	7.71875e-06	0.373388	0.852	0.716	0.113682	3
Rbm28	7.8872e-06	0.732461	0.256	0.139	0.116163	3
Celf2	7.89504e-06	0.344607	0.861	0.765	0.116278	3
Ikzf1	7.89525e-06	0.301038	0.91	0.825	0.116281	3
Galnt101	8.1209e-06	0.602065	0.345	0.207	0.119605	3
Ptpn1	8.19496e-06	0.352365	0.565	0.373	0.120695	3
Usp34	8.24692e-06	0.449824	0.646	0.489	0.121461	3
Ttc171	8.25115e-06	0.644632	0.399	0.262	0.121523	3
Prrc2c1	8.40874e-06	0.423954	0.561	0.385	0.123844	3
Ccdc50	8.44167e-06	0.361013	0.587	0.396	0.124329	3
Pnp	8.5721e-06	0.776368	0.256	0.142	0.12625	3
Zfp451	8.68755e-06	0.921799	0.251	0.14	0.12795	3
Bach21	8.70174e-06	0.424615	0.623	0.469	0.128159	3
Rab2a1	8.87863e-06	0.526462	0.462	0.31	0.130765	3
Smarca21	8.89643e-06	0.510284	0.547	0.392	0.131027	3
Foxn3	8.9e-06	0.25932	0.946	0.909	0.131079	3
Usp241	8.94853e-06	0.364306	0.619	0.432	0.131794	3
Cep170	9.04236e-06	0.4768	0.538	0.372	0.133176	3
Hook31	9.18018e-06	0.615186	0.435	0.292	0.135206	3
March6	9.23641e-06	0.770974	0.274	0.156	0.136034	3
P2ry121	9.28167e-06	0.338005	0.888	0.839	0.1367	3
Lpar6	9.33765e-06	0.499292	0.435	0.281	0.137525	3
Acss11	9.36316e-06	0.565464	0.43	0.277	0.137901	3
Ubash3b	9.43725e-06	0.40424	0.78	0.651	0.138992	3
Crybg3	9.5043e-06	0.858229	0.278	0.161	0.139979	3
Rhot11	9.54811e-06	0.809295	0.323	0.2	0.140625	3
Cdk9	9.60542e-06	0.676321	0.278	0.157	0.141469	3
Stk3	9.78511e-06	0.534331	0.462	0.305	0.144115	3
Mllt10	9.83122e-06	0.399342	0.691	0.503	0.144794	3
Thada1	1.00451e-05	0.584561	0.448	0.3	0.147944	3
Itgav	1.04235e-05	0.627053	0.493	0.349	0.153517	3
Srsf6	1.07593e-05	0.752739	0.269	0.152	0.158463	3
Zmynd111	1.12656e-05	0.525213	0.448	0.299	0.16592	3
Rhobtb11	1.13633e-05	0.445975	0.502	0.329	0.167359	3
Tia11	1.18249e-05	0.519184	0.426	0.275	0.174158	3
Rc3h1	1.20311e-05	0.468766	0.435	0.279	0.177194	3
Fgf131	1.21412e-05	0.736212	0.511	0.373	0.178816	3
Ddx39b	1.22154e-05	0.706895	0.332	0.204	0.179909	3
Rnf381	1.23864e-05	0.676204	0.395	0.262	0.182428	3
Ext1	1.2568e-05	0.527864	0.448	0.298	0.185102	3
Aak11	1.26632e-05	0.695932	0.39	0.26	0.186504	3
Cep85l1	1.27342e-05	0.670236	0.332	0.203	0.18755	3
Tmed10	1.2737e-05	0.715211	0.274	0.156	0.18759	3
Rnf150	1.27469e-05	0.671853	0.341	0.212	0.187737	3
Eml61	1.28143e-05	0.503374	0.484	0.332	0.188729	3
Xpot	1.28377e-05	0.785369	0.256	0.143	0.189073	3
Sptlc2	1.30004e-05	0.629286	0.377	0.239	0.19147	3
Wdr44	1.30332e-05	0.481621	0.52	0.359	0.191953	3
Nbeal11	1.30631e-05	0.714179	0.345	0.217	0.192393	3
Galnt71	1.33873e-05	0.577153	0.359	0.224	0.197168	3
Rbm6	1.34037e-05	0.488765	0.632	0.467	0.19741	3
Zfp385a	1.38931e-05	0.863021	0.265	0.153	0.204618	3
Sarnp1	1.39391e-05	0.709728	0.318	0.194	0.205296	3
Zfp280d1	1.52374e-05	0.803781	0.359	0.235	0.224416	3
Pi4ka	1.55203e-05	0.89239	0.26	0.152	0.228583	3
Rsu11	1.55466e-05	0.686782	0.368	0.233	0.228971	3
Cdk131	1.56215e-05	0.439393	0.583	0.419	0.230074	3
Uri1	1.57786e-05	0.7016	0.287	0.168	0.232387	3
Pibf11	1.58215e-05	0.63669	0.422	0.285	0.233019	3
Clasp21	1.58255e-05	0.501643	0.686	0.531	0.233077	3
Mbnl21	1.59462e-05	0.38089	0.753	0.586	0.234856	3
Tlk21	1.64127e-05	0.7016	0.35	0.225	0.241726	3
Zfp592	1.64666e-05	0.820245	0.283	0.168	0.24252	3
Eml4	1.64686e-05	0.429398	0.561	0.387	0.24255	3
Cd2ap1	1.66489e-05	0.433246	0.596	0.431	0.245205	3
Pik3r1	1.72444e-05	0.362694	0.749	0.584	0.253975	3
Phactr21	1.74634e-05	0.492372	0.489	0.333	0.257201	3
2510009E07Rik1	1.80834e-05	0.658304	0.327	0.199	0.266332	3
Wdr261	1.8337e-05	0.441909	0.565	0.41	0.270067	3
Gm21057	1.84697e-05	0.7016	0.323	0.201	0.272022	3
Sall1	1.84909e-05	0.424404	0.619	0.451	0.272334	3
Zfp9511	1.95107e-05	0.605196	0.323	0.196	0.287354	3
Vrk2	1.97055e-05	0.325734	0.659	0.476	0.290222	3
Zswim6	1.99604e-05	0.338861	0.821	0.708	0.293977	3
Cebpz	2.00624e-05	0.513632	0.386	0.247	0.295479	3
Ubr11	2.02616e-05	0.793428	0.327	0.21	0.298412	3
Spire11	2.03035e-05	0.465603	0.574	0.412	0.29903	3
Rbm33	2.04999e-05	0.524062	0.448	0.297	0.301923	3
Pald11	2.05399e-05	0.611214	0.404	0.267	0.302511	3
Far1	2.07816e-05	0.472848	0.381	0.239	0.306071	3
Fmnl3	2.10271e-05	0.463978	0.547	0.383	0.309687	3
Gm13684	2.16112e-05	0.726986	0.291	0.174	0.318289	3
Ppp2r5a1	2.17055e-05	0.630342	0.314	0.188	0.319678	3
Adhfe1	2.19582e-05	0.707624	0.287	0.17	0.3234	3
Tmem164	2.19635e-05	0.416811	0.552	0.386	0.323478	3
Bdp1	2.20224e-05	0.910187	0.26	0.152	0.324346	3
Cers6	2.20355e-05	0.787097	0.274	0.162	0.324539	3
Pias21	2.22919e-05	0.467223	0.48	0.324	0.328316	3
Ddx42	2.25015e-05	0.683222	0.287	0.17	0.331402	3
Ppp3ca	2.25823e-05	0.304546	0.861	0.715	0.332592	3
Smg1	2.2604e-05	0.362446	0.673	0.487	0.332912	3
P2ry13	2.28121e-05	0.767189	0.274	0.16	0.335977	3
Scai	2.29736e-05	0.754549	0.269	0.156	0.338356	3
Tent4b	2.32674e-05	0.610102	0.309	0.188	0.342682	3
Senp61	2.46486e-05	0.54208	0.448	0.304	0.363025	3
Wtap	2.46883e-05	0.731502	0.256	0.146	0.363609	3
Scamp51	2.48587e-05	0.569775	0.39	0.256	0.366118	3
Abcd21	2.48728e-05	0.626713	0.39	0.254	0.366326	3
Cdc42se21	2.50895e-05	0.639235	0.314	0.189	0.369519	3
Xiap	2.54952e-05	0.356952	0.583	0.422	0.375493	3
Pds5a	2.56033e-05	0.358456	0.511	0.345	0.377085	3
Wipf2	2.59814e-05	0.742242	0.256	0.147	0.382654	3
Tardbp1	2.6242e-05	0.630006	0.354	0.225	0.386493	3
Ano6	2.65124e-05	0.500354	0.39	0.252	0.390474	3
Tasor1	2.72158e-05	0.424305	0.507	0.352	0.400835	3
Map3k3	2.79668e-05	0.318863	0.722	0.535	0.411896	3
Map4k41	2.81061e-05	0.442988	0.641	0.484	0.413947	3
Ubn11	2.81277e-05	0.648607	0.345	0.218	0.414265	3
Wdfy41	2.8155e-05	0.555723	0.516	0.377	0.414667	3
Zcchc71	2.8242e-05	0.366949	0.798	0.678	0.415949	3
Cfap741	2.90294e-05	0.580491	0.39	0.255	0.427545	3
Fer1	2.96675e-05	0.486292	0.529	0.375	0.436943	3
N4bp2l21	2.9982e-05	0.477265	0.399	0.259	0.441575	3
Ufl1	3.02092e-05	0.823493	0.26	0.153	0.44492	3
Mkln11	3.04148e-05	0.371964	0.655	0.475	0.447949	3
Nudcd31	3.04172e-05	0.562947	0.395	0.261	0.447984	3
Tspan141	3.10139e-05	0.437006	0.511	0.361	0.456772	3
Usp31	3.11676e-05	0.66393	0.395	0.267	0.459036	3
Stag2	3.17445e-05	0.38806	0.565	0.402	0.467533	3
Herc2	3.34072e-05	0.369619	0.713	0.565	0.492021	3
Arhgef40	3.37531e-05	0.634486	0.291	0.176	0.497115	3
Hectd11	3.38591e-05	0.464206	0.444	0.297	0.498676	3
Sipa1l3	3.44569e-05	0.715211	0.269	0.159	0.507481	3
Snx131	3.51529e-05	0.374397	0.574	0.401	0.517732	3
Plcg1	3.54935e-05	0.708905	0.256	0.148	0.522748	3
Bmpr1a	3.71058e-05	0.810601	0.256	0.149	0.546494	3
Mapk11	3.76579e-05	0.59931	0.35	0.222	0.554626	3
Tnrc18	3.83825e-05	0.405359	0.484	0.329	0.565298	3
Gbf11	3.85337e-05	0.541729	0.417	0.276	0.567524	3
Il151	3.87906e-05	0.555481	0.318	0.195	0.571308	3
Zfp5321	3.9776e-05	0.672336	0.386	0.259	0.585821	3
Grb2	4.02123e-05	0.463088	0.538	0.394	0.592246	3
Tasor2	4.07456e-05	0.626833	0.327	0.206	0.600101	3
Arglu1	4.09253e-05	0.3762	0.691	0.523	0.602748	3
Tra2a1	4.11289e-05	0.470724	0.596	0.449	0.605746	3
8030462N17Rik	4.322e-05	0.849792	0.251	0.148	0.636545	3
Trip111	4.32618e-05	0.585175	0.395	0.264	0.63716	3
Reep3	4.33514e-05	0.831661	0.278	0.172	0.638479	3
Bcl2l11	4.4016e-05	0.626939	0.318	0.2	0.648268	3
Ptpre	4.4247e-05	0.574544	0.359	0.233	0.651669	3
Insr1	4.43312e-05	0.453847	0.489	0.338	0.65291	3
Asph1	4.44468e-05	0.346792	0.605	0.441	0.654612	3
Btbd9	4.46988e-05	0.377299	0.726	0.576	0.658324	3
Rtn41	4.49631e-05	0.36408	0.623	0.466	0.662217	3
Tug1	4.51671e-05	0.747404	0.287	0.175	0.665221	3
Col27a1	4.5423e-05	0.460365	0.498	0.355	0.66899	3
Gna151	4.54455e-05	0.33938	0.547	0.378	0.669322	3
Gon4l	4.5675e-05	0.447576	0.439	0.293	0.672701	3
Ubr21	4.64622e-05	0.48342	0.377	0.24	0.684295	3
Rab31	4.69535e-05	0.535311	0.538	0.395	0.691531	3
Arhgap22	4.71335e-05	0.361381	0.798	0.655	0.694183	3
Ptpra1	4.84047e-05	0.36229	0.578	0.405	0.712905	3
Akna1	5.00595e-05	0.685659	0.291	0.179	0.737277	3
Pdxdc11	5.04226e-05	0.7016	0.323	0.207	0.742625	3
Cyfip1	5.15394e-05	0.364902	0.7	0.548	0.759073	3
Pnisr1	5.19942e-05	0.403395	0.655	0.494	0.765771	3
2210408I21Rik	5.30354e-05	1.13456	0.256	0.156	0.781105	3
Pip4k2a	5.30593e-05	0.300976	0.906	0.832	0.781458	3
Tra2b	5.44884e-05	0.556035	0.462	0.329	0.802504	3
Vti1a1	5.59428e-05	0.497485	0.605	0.466	0.823926	3
Eri31	5.74752e-05	0.48469	0.408	0.271	0.846494	3
Pum2	5.75344e-05	0.433645	0.565	0.417	0.847367	3
Wdfy2	5.78221e-05	0.372127	0.574	0.404	0.851604	3
Sipa1l11	5.8383e-05	0.452966	0.52	0.375	0.859865	3
Trio1	5.87273e-05	0.506344	0.529	0.396	0.864935	3
Pld1	5.95499e-05	0.357698	0.713	0.54	0.877051	3
Herc1	5.98032e-05	0.323716	0.596	0.421	0.880782	3
Tmcc11	6.18525e-05	0.42287	0.592	0.443	0.910964	3
Kmt5b1	6.28418e-05	0.555303	0.395	0.268	0.925533	3
Taf3	6.31176e-05	0.668503	0.287	0.176	0.929596	3
Phc21	6.45768e-05	0.414862	0.516	0.37	0.951087	3
Btk1	6.49724e-05	0.391989	0.511	0.35	0.956913	3
Chd41	6.60008e-05	0.599396	0.318	0.201	0.97206	3
Evl1	6.60261e-05	0.367132	0.57	0.404	0.972433	3
Ralgapa11	6.61142e-05	0.633036	0.381	0.258	0.97373	3
Wac	6.68362e-05	0.401555	0.525	0.369	0.984364	3
Rubcnl	6.71803e-05	0.734465	0.274	0.166	0.989432	3
Samsn11	6.72678e-05	0.560913	0.341	0.217	0.99072	3
Magi11	6.80835e-05	0.339295	0.762	0.613	1	3
Eif4h	6.82068e-05	0.614138	0.269	0.16	1	3
Fryl1	7.00917e-05	0.581619	0.408	0.284	1	3
Krcc1	7.08544e-05	0.56699	0.399	0.273	1	3
Zfx1	7.09566e-05	0.472976	0.377	0.244	1	3
Lyzl4	7.29646e-05	0.563454	0.269	0.159	1	3
Mgrn11	7.54793e-05	0.567115	0.336	0.216	1	3
Rbm25	7.57322e-05	0.348738	0.691	0.509	1	3
Pmepa1	7.57612e-05	0.309403	0.565	0.402	1	3
March1	8.11548e-05	0.277555	0.861	0.716	1	3
Phip	8.35966e-05	0.327336	0.52	0.361	1	3
Pik3cg1	8.38074e-05	0.461311	0.381	0.251	1	3
Stk101	8.4045e-05	0.500613	0.363	0.235	1	3
Hnrnpdl1	8.40585e-05	0.497441	0.359	0.233	1	3
Gpr1551	8.56061e-05	0.597551	0.3	0.185	1	3
Jak11	8.74673e-05	0.34224	0.57	0.404	1	3
Lpp1	9.01233e-05	0.501145	0.435	0.301	1	3
Chd11	9.06856e-05	0.513528	0.318	0.199	1	3
Resf1	9.13136e-05	0.5334	0.453	0.322	1	3
Zzz31	9.18422e-05	0.576292	0.327	0.21	1	3
Plekhm31	9.21498e-05	0.432309	0.48	0.336	1	3
Slmap	9.53505e-05	0.396524	0.511	0.366	1	3
Wrn	9.64354e-05	0.723065	0.278	0.172	1	3
Tgfb11	9.84054e-05	0.564097	0.386	0.261	1	3
Tmem1311	0.000100524	0.490331	0.359	0.235	1	3
Adnp1	0.000100673	0.643327	0.332	0.216	1	3
Btrc1	0.00010264	0.665704	0.305	0.196	1	3
Hpgd	0.000104103	0.552087	0.448	0.312	1	3
Kat6a	0.000104794	0.380875	0.525	0.374	1	3
Tcf7l2	0.000105392	0.472575	0.502	0.365	1	3
Ncoa21	0.000105418	0.371137	0.583	0.425	1	3
Nptn1	0.000106585	0.445036	0.466	0.329	1	3
Yme1l1	0.000108339	0.632739	0.287	0.177	1	3
Comt1	0.000110724	0.327745	0.587	0.426	1	3
4933406I18Rik	0.000111572	0.334961	0.897	0.858	1	3
Heca	0.000115125	0.65543	0.291	0.184	1	3
Phf31	0.000115661	0.655929	0.363	0.25	1	3
Rptor1	0.000116163	0.268339	0.776	0.58	1	3
Fam193a1	0.000117042	0.381216	0.583	0.42	1	3
Zfp697	0.000117601	0.624559	0.278	0.171	1	3
Arnt1	0.000118227	0.446923	0.39	0.26	1	3
Lcor	0.000126299	0.379208	0.592	0.435	1	3
Tbck1	0.000127415	0.45924	0.43	0.299	1	3
Tgfbr21	0.000133496	0.351973	0.686	0.535	1	3
Fchsd21	0.000133998	0.264164	0.901	0.842	1	3
Orc4	0.000135429	0.689919	0.296	0.19	1	3
Sla1	0.000136074	0.548211	0.377	0.256	1	3
Chd8	0.000136996	0.558935	0.336	0.22	1	3
Arid4a	0.000137771	0.406574	0.516	0.373	1	3
Csnk1a11	0.000138149	0.410261	0.489	0.346	1	3
Ralgapa2	0.000139914	0.766976	0.26	0.161	1	3
Casd11	0.000141304	0.456978	0.354	0.228	1	3
Fbxl171	0.00014181	0.314617	0.771	0.609	1	3
Pip4p1	0.000145018	0.407655	0.444	0.308	1	3
Zfp62	0.000149387	0.662072	0.3	0.193	1	3
Sall3	0.000150413	0.695028	0.269	0.167	1	3
Washc41	0.000150579	0.424199	0.462	0.331	1	3
Ubn21	0.00015378	0.37445	0.641	0.484	1	3
Ccdc931	0.000154561	0.521028	0.359	0.24	1	3
Arfgef1	0.000157456	0.563374	0.39	0.272	1	3
Stat5b	0.000161271	0.471931	0.408	0.276	1	3
Ppp2r5c1	0.000161377	0.432852	0.466	0.329	1	3
Ecpas1	0.000161406	0.541868	0.404	0.286	1	3
Vrk1	0.000163821	0.695116	0.265	0.164	1	3
Itsn21	0.000164196	0.484213	0.516	0.384	1	3
Nf11	0.000164235	0.332367	0.691	0.526	1	3
Wdr371	0.000165965	0.44459	0.377	0.25	1	3
Smarcad11	0.000166897	0.532979	0.314	0.201	1	3
Itprid21	0.000168104	0.630342	0.287	0.182	1	3
Trak11	0.000168896	0.509318	0.327	0.212	1	3
Prpsap21	0.000171576	0.51233	0.372	0.251	1	3
Slc40a11	0.000174017	0.431298	0.381	0.253	1	3
Snapc31	0.00017741	0.59014	0.314	0.203	1	3
Naa16	0.0001801	0.7016	0.265	0.166	1	3
Zfp160	0.000182216	0.698069	0.256	0.157	1	3
Ccny	0.000184485	0.518926	0.404	0.28	1	3
Nr6a1os1	0.000186843	0.449843	0.417	0.287	1	3
Eif4g31	0.000188606	0.30575	0.664	0.513	1	3
9930111J21Rik21	0.000197991	0.599905	0.323	0.214	1	3
Soga1	0.000199633	0.324264	0.587	0.431	1	3
9130019P16Rik	0.000200597	0.86529	0.278	0.178	1	3
Ap3b1	0.000205044	0.391745	0.574	0.432	1	3
Fbxw111	0.000212475	0.505925	0.39	0.269	1	3
Med13l1	0.000213221	0.352526	0.574	0.421	1	3
Rp21	0.000214371	0.433789	0.439	0.309	1	3
R3hcc1l	0.000214724	0.610565	0.3	0.194	1	3
Rngtt	0.000215035	0.608491	0.327	0.214	1	3
Dis3l21	0.000215717	0.47288	0.435	0.311	1	3
Cbl	0.000218533	0.34485	0.529	0.388	1	3
Sec63	0.000218971	0.687359	0.291	0.191	1	3
Exoc5	0.000219266	0.437788	0.381	0.259	1	3
Crebbp	0.00022015	0.34747	0.668	0.519	1	3
Mfap3	0.00022204	0.474367	0.332	0.216	1	3
Zdhhc141	0.00022402	0.293227	0.605	0.443	1	3
Itfg1	0.000224186	0.633242	0.296	0.192	1	3
Mylip1	0.000224461	0.332144	0.592	0.451	1	3
[truncated: 1,959 more rows]
