# Supplementary material for: Microglial BIN1 deficiency elicits enhanced microglial inflammatory responses that mimic early AD pathology
Source: Research Square preprint supplement (doi:10.21203/rs.3.rs-7262443/v1), 2025-08-14
Supplement: Supplementary file 5 [file e1348d3e1dd984f7fd980dd8.xlsx]

## Sheet: Gene Signatures
Suppl. File 5: Gene Signatures for microglial cells, previously identified under well-defined conditions, extracted from CeIIID
Genes	State
Aig1	DAM
Cd48	DAM
Gm13048	DAM
Prdx4	DAM
Fxc1	DAM
Tmem106A	DAM
Fam46C	DAM
Pcna	DAM
Soat1	DAM
Gm10294	DAM
Trem2	DAM
Rps21	DAM
Gm11741	DAM
Ccl12	DAM
Rpl31	DAM
Gm15500	DAM
Fau	DAM
Rps25-Ps1	DAM
Rps25	DAM
Plbd2	DAM
Chst11	DAM
Scand1	DAM
Gltp	DAM
Ccdc132	DAM
Prdx1	DAM
Rplp2-Ps1	DAM
2410015M20Rik	DAM
Nampt	DAM
H2-Dma	DAM
Usp12	DAM
Rpl30	DAM
Rpl28-Ps3	DAM
Pea15A	DAM
Timm9	DAM
Asna1	DAM
Hcfc1R1	DAM
Fuca1	DAM
Rpl18-Ps1	DAM
Bloc1S1	DAM
Nsmce1	DAM
Ptprm	DAM
Gm16238	DAM
Bc029722	DAM
Mthfs	DAM
Itgb1Bp1	DAM
Cryz	DAM
Mpeg1	DAM
Gm13436	DAM
St6Gal1	DAM
Vegfb	DAM
Mmu-Mir-703	DAM
Rps24	DAM
Rhoc	DAM
Gm13226	DAM
Gm13456	DAM
Rps27A	DAM
Eif1Ax	DAM
Cd68	DAM
Vkorc1	DAM
Gm6202	DAM
Gm6415	DAM
Gm8730	DAM
Gm6023	DAM
Gm4149	DAM
Gm7290	DAM
Rpl10A	DAM
Eef1B2	DAM
Rps28	DAM
4931406P16Rik	DAM
Rpl37A	DAM
Dnajb14	DAM
Padi2	DAM
Gm10073	DAM
Hars2	DAM
B2M	DAM
Adar	DAM
Ggh	DAM
Agpat2	DAM
Abcd2	DAM
Rpl38	DAM
Rps29	DAM
Rpl10A-Ps1	DAM
Rpl34	DAM
Rps16-Ps2	DAM
Rpl37	DAM
Tnfaip3	DAM
Nap1L1	DAM
Il4I1	DAM
Timm13	DAM
Rps14	DAM
Pgls	DAM
Nme2	DAM
Gm5559	DAM
Ac151602.1	DAM
Gm12254	DAM
Rps5	DAM
1110038B12Rik	DAM
1810027O10Rik	DAM
Rps17	DAM
Rpl38-Ps2	DAM
Rps16	DAM
Pgk1	DAM
Fundc2	DAM
Cox6A1	DAM
Ctsd	DAM
Rpl28-Ps1	DAM
Tpi1	DAM
Ctsl	DAM
Sc4Mol	DAM
Renbp	DAM
Gm11478	DAM
Zfyve21	DAM
Eif4Ebp1	DAM
Gm11361	DAM
Ptplb	DAM
Gm9294	DAM
Gm10076	DAM
Hif1A	DAM
Gm5244	DAM
Myeov2	DAM
Fth1	DAM
Gm5963	DAM
Ssh1	DAM
Gm10279	DAM
Atp6V0C	DAM
0610037P05Rik	DAM
Gng12	DAM
Gm13826	DAM
Siglec5	DAM
Ssr4	DAM
Gm10443	DAM
Rpl23	DAM
Dusp3	DAM
0610012G03Rik	DAM
Atp11C	DAM
Arrdc4	DAM
Mt1	DAM
Gm13192	DAM
Naglu	DAM
Mir682	DAM
Tyrobp	DAM
Gm10186	DAM
Sdc3	DAM
Gm15772	DAM
Gm9493	DAM
Adck5	DAM
Gm10136	DAM
Pkib	DAM
Bola2	DAM
Thbs1	DAM
Gm5805	DAM
Npc2	DAM
Rras	DAM
Scd2	DAM
Syngr1	DAM
Ctsz	DAM
Tpd52	DAM
Aprt	DAM
Frrs1	DAM
Tuba1C	DAM
1500012F01Rik	DAM
Tsta3	DAM
Rpl36A-Ps1	DAM
Gm5239	DAM
Gm7363	DAM
Atf3	DAM
Slc44A1	DAM
Adarb1	DAM
Ndufv3	DAM
Gm7331	DAM
Pld3	DAM
Zdhhc21	DAM
Echs1	DAM
Mrpl27	DAM
Gusb	DAM
Slc23A2	DAM
Gm11353	DAM
Pgcp	DAM
Rap2B	DAM
Ccdc88A	DAM
Gm16247	DAM
Csf2Ra	DAM
Cox6C	DAM
Cxcl16	DAM
Gm8129	DAM
Glipr1	DAM
Fcgr4	DAM
Serpine2	DAM
Cd74	DAM
Arap2	DAM
Ctsb	DAM
Rps18	DAM
Nat8L	DAM
Dnajc15	DAM
Cd9	DAM
Upp2	DAM
Gm4902	DAM
Gm6030	DAM
Bcl2A1B	DAM
Pogk	DAM
Tbcd	DAM
Dhx32	DAM
Al928935.1	DAM
Gnas	DAM
Ftl1	DAM
Trim32	DAM
Dpcd	DAM
Crlf2	DAM
H2-K1	DAM
Slamf9	DAM
Cd34	DAM
Cdc42Ep3	DAM
Stim2	DAM
9130401M01Rik	DAM
Lgals3Bp	DAM
Rps24-Ps3	DAM
Aplp2	DAM
Ramp1	DAM
Ttf1	DAM
Dhcr7	DAM
Scpep1	DAM
Myo1E	DAM
Kcnj2	DAM
Cd63	DAM
Ankrd16	DAM
Enpp2	DAM
Acaca	DAM
Cd52	DAM
2010002N04Rik	DAM
Sulf2	DAM
Ccl6	DAM
Speg	DAM
St8Sia6	DAM
Ifi204	DAM
Mblac2	DAM
Cadm1	DAM
Mif	DAM
Tspo	DAM
Cd63-Ps	DAM
Ifi27L2B	DAM
Lyzl4	DAM
Cpd	DAM
Dpp7	DAM
Apbb2	DAM
Srebf2	DAM
Cybb	DAM
Fgl2	DAM
Fxyd5	DAM
Cd83	DAM
Ifit1	DAM
Crip1	DAM
Cd22	DAM
Asb10	DAM
Ache	DAM
Ttr	DAM
Chst1	DAM
Mmu-Mir-2134-2	DAM
Ell2	DAM
S1Pr1	DAM
Enpp1	DAM
H2-D1	DAM
Nlrc5	DAM
Got1	DAM
Ch25H	DAM
Nceh1	DAM
Ero1Lb	DAM
Lgi2	DAM
Ifi27L2A	DAM
Pycrl	DAM
Slc1A2	DAM
Apoe	DAM
Lyz2	DAM
Capg	DAM
Ifit2	DAM
Etl4	DAM
H2-Q7	DAM
Cdca8	DAM
Gpr65	DAM
Birc5	DAM
4632427E13Rik	DAM
St14	DAM
Il1B	DAM
Psat1	DAM
Fxyd6	DAM
Ildr2	DAM
Gpnmb	DAM
Igf1	DAM
Axl	DAM
Spp1	DAM
Cox6A2	DAM
Zfp692	DAM
Ank	DAM
Lpl	DAM
Tmem154	DAM
Baiap2L2	DAM
Clec7A	DAM
Ccl3	DAM
5430435G22Rik	DAM
Csf1	DAM
Egr2	DAM
Lmbrd2	DAM
Ccl4	DAM
Fam20C	DAM
Cst7	DAM
Mamdc2	DAM
Itgax	DAM
P2Ry12	HOM
Tmem119	HOM
Cx3Cr1	HOM
Selplg	HOM
Marcks	HOM
Cd164	HOM
Maf	HOM
P2Ry13	HOM
Ccr5	HOM
Glul	HOM
Rhob	HOM
Slco2B1	HOM
Malat1	HOM
Zfhx3	HOM
Cmtm6	HOM
Lpcat2	HOM
Ecscr	HOM
Txnip	HOM
Fscn1	HOM
Ifngr1	HOM
Srgap2	HOM
Tmem173	HOM
Crybb1	HOM
Gpr56	HOM
Lyn	HOM
Ltc4S	HOM
Calm2	HOM
Fgd2	HOM
Fam105A	HOM
Il6Ra	HOM
Alox5Ap	HOM
Clec4A2	HOM
Ckb	HOM
Rps6Ka1	HOM
Il10Ra	HOM
Snn	HOM
Susd3	HOM
Stab1	HOM
Filip1L	HOM
Lrba	HOM
Nrip1	HOM
Gpc2	HOM
Irf2Bp2	HOM
Tm6Sf1	HOM
Lpar6	HOM
Zfp36L1	HOM
Fez2	HOM
Nr3C1	HOM
Gna15	HOM
Tpst2	HOM
Cebpd	HOM
Ssh2	HOM
Elmo1	HOM
Dusp6	HOM
Sh2B3	HOM
Serpinf1	HOM
Il16	HOM
Tgm2	HOM
Pik3R1	HOM
Dapp1	HOM
Nfkbia	HOM
Tsc22D3	HOM
Ets1	HOM
Bc035044	HOM
Mgat1	HOM
Ivns1Abp	HOM
Hs6St1	HOM
Igfbp4	HOM
Ggta1	HOM
Gbp7	HOM
Tnfrsf1B	HOM
Slc40A1	HOM
Fam46A	HOM
Atp6V0A2	HOM
Tcf4	HOM
Sox4	HOM
Slc2A5	HOM
Tuba1A	HOM
Chst7	HOM
Eef2K	HOM
Cep68	HOM
Sla	HOM
Vasp	HOM
Idh2	HOM
B4Galt4	HOM
Zfp710	HOM
Adap2	HOM
Ms4A6B	HOM
Adrbk1	HOM
Rogdi	HOM
Prkcd	HOM
Slc9A9	HOM
Slc1A3	HOM
P2Rx7	HOM
Lifr	HOM
Mtss1	HOM
Ptafr	HOM
Rab3Il1	HOM
Tob2	HOM
Ophn1	HOM
Adrb2	HOM
Tjp1	HOM
Zfp652	HOM
Klhdc8B	HOM
Arhgap27	HOM
Fchsd2	HOM
Commd8	HOM
Rtn1	HOM
Sesn1	HOM
Chd9	HOM
Snta1	HOM
Gp9	HOM
Usp24	HOM
Grap	HOM
Kcnk12	HOM
Tppp	HOM
Cybasc3	HOM
Etv5	HOM
Ttyh3	HOM
Sqrdl	HOM
Kctd12	HOM
Tspan14	HOM
Hfe	HOM
Ier5	HOM
Klf2	HOM
Sult1A1	HOM
Slco4A1	HOM
Frmd4A	HOM
Abl1	HOM
Klf7	HOM
Tagap	HOM
Asb2	HOM
Fam110A	HOM
Fbrsl1	HOM
Akap13	HOM
Upk1B	HOM
U4Atac	HOM
Sash3	HOM
Dock10	HOM
Tnrc6B	HOM
Hps3	HOM
Abcc3	HOM
Plxna4	HOM
Gtf2H2	HOM
Scamp5	HOM
Hist1H1E	HOM
Kif21B	HOM
Pecam1	HOM
Pten	HOM
Med12L	HOM
Snx6	HOM
Il7R	HOM
Akirin2	HOM
Il17Ra	HOM
Hlf	HOM
Adora3	HOM
Abca9	HOM
Ptp4A3	HOM
Ggt5	HOM
Rapgef5	HOM
Pdlim4	HOM
Lbr	HOM
Tnfaip8L2	HOM
Cnot8	HOM
Ppp1R9A	HOM
Rgl1	HOM
Clk1	HOM
Tnfrsf11A	HOM
Ssbp3	HOM
Bmf	HOM
D14Abb1E	HOM
Tmem170B	HOM
Akna	HOM
Slc46A1	HOM
Gnb2	HOM
Ttc7	HOM
Arap3	HOM
Pld1	HOM
Mkrn1	HOM
Gimap6	HOM
Tmem100	HOM
Ppp2R5E	HOM
Itgav	HOM
Rgmb	HOM
Cryba4	HOM
Myst3	HOM
Tle3	HOM
Myo1B	HOM
Eng	HOM
Zfp36L2	HOM
Pwwp2A	HOM
Il21R	HOM
Gng2	HOM
Ldb1	HOM
Slfn8	HOM
Sbf2	HOM
Gab1	HOM
Stard9	HOM
Mex3B	HOM
Itga9	HOM
Pptc7	HOM
Rapgef6	HOM
Lgals8	HOM
Aagab	HOM
Ik	HOM
Rab39	HOM
Pxn	HOM
Chsy1	HOM
Ip6K1	HOM
Cd33	HOM
Dbp	HOM
Neurl1A	HOM
Mrc1	HOM
Cdk5R1	HOM
1500010J02Rik	HOM
Rgs19	HOM
Crim1	HOM
Slc4A7	HOM
Zbtb7A	HOM
Adrb1	HOM
Smndc1	HOM
Sykb	HOM
Jmjd1C	HOM
Ncoa2	HOM
Epn2	HOM
Ypel2	HOM
6230427J02Rik	HOM
Tbl1X	HOM
36951	HOM
Bptf	HOM
Cggbp1	HOM
Chd6	HOM
E2F3	HOM
Ccdc47	HOM
Nav3	HOM
Gpam	HOM
Gnb4	HOM
Rbm7	HOM
Rbbp6	HOM
Usp22	HOM
Sf1	HOM
Ankrd11	HOM
U6Atac	HOM
Arid3A	HOM
Jmjd6	HOM
Ccl24	HOM
Srsf4	HOM
Tcfe3	HOM
Bc013712	HOM
Clcn5	HOM
Etv3	HOM
Tnpo1	HOM
Arhgef10L	HOM
Snx2	HOM
Rnf6	HOM
Ccl9	HOM
Dock4	HOM
Setd1B	HOM
Pafah1B1	HOM
Mknk2	HOM
Rere	HOM
Arhgef40	HOM
Plekha2	HOM
Lactb	HOM
Celf1	HOM
Kpna1	HOM
Fam53B	HOM
Tmpo	HOM
B230354K17Rik	HOM
Stambpl1	HOM
E230001N04Rik	HOM
Herc1	HOM
S100A8	HOM
Abcc5	HOM
Mfap3	HOM
Zfp532	HOM
Zbtb20	HOM
Arid4A	HOM
Fam107B	HOM
Rreb1	HOM
Kcnk13	HOM
Kdm6A	HOM
Zswim6	HOM
B4Galt6	HOM
Accs	HOM
Eps8	HOM
3110062M04Rik	HOM
Pdlim5	HOM
Dcun1D2	HOM
Trib1	HOM
Rdx	HOM
Arhgap4	HOM
Ppp6R3	HOM
Gtf2I	HOM
Brd2	HOM
Dpp3	HOM
Ss18	HOM
Tmem44	HOM
D1Ertd622E	HOM
Rnf185	HOM
Zcchc14	HOM
Csad	HOM
Efnb1	HOM
Ccdc12	HOM
Rb1Cc1	HOM
Zfp68	HOM
Rnf215	HOM
Lrch3	HOM
Mcm3	HOM
Tifab	HOM
Gatm	HOM
Rmnd5B	HOM
Wdr61	HOM
Ppfibp2	HOM
Zfp141	HOM
Sh2D3C	HOM
Git2	HOM
1200014J11Rik	HOM
Mdm4	HOM
Jun	HOM
2510002D24Rik	HOM
Trp53Bp1	HOM
Pabpn1	HOM
A630033H20Rik	HOM
Klraq1	HOM
Atg16L1	HOM
Ccdc111	HOM
Rbmx	HOM
Txndc15	HOM
Tmem64	HOM
Kdm6B	HOM
Rg9Mtd1	HOM
Atg4C	HOM
Ptpn9	HOM
Setd5	HOM
Zfp748	HOM
Trnt1	HOM
Cul3	HOM
Rnf19B	HOM
Trim30D	HOM
Fam125B	HOM
Scfd1	HOM
Taf1D	HOM
Bcl9	HOM
Hist1H2Be	HOM
Atp2B1	HOM
Txndc11	HOM
Klhl23	HOM
Gpr77	HOM
Nipa2	HOM
Lmo4	HOM
Sdccag8	HOM
Cib1	HOM
Sfrs18	HOM
Ppcdc	HOM
Kcnd1	HOM
Arhgap30	HOM
Zranb1	HOM
Atf7Ip	HOM
C130039O16Rik	HOM
Srek1Ip1	HOM
Rassf1	HOM
Cass4	HOM
Stam	HOM
Tubgcp5	HOM
Tmem110	HOM
2610008E11Rik	HOM
Zfp691	HOM
Nudcd2	HOM
Banp	HOM
Trp53I11	HOM
Sema6D	HOM
Ubfd1	HOM
Acap2	HOM
Inpp4B	HOM
Zeb1	HOM
Ccdc97	HOM
Armc5	HOM
Kdm3B	HOM
Ndfip1	HOM
Utp11L	HOM
Galnt2	HOM
Nsun6	HOM
Dido1	HOM
Rb1	HOM
Sh3Bp5	HOM
Eif2Ak1	HOM
Prdm2	HOM
Mtap1S	HOM
Hmgcl	HOM
Sdccag3	HOM
Scarna16	HOM
Mgll	HOM
Rbm18	HOM
Camsap1	HOM
Bc005561	HOM
Bend6	HOM
Fyco1	HOM
Nae1	HOM
Sp3	HOM
Stim1	HOM
Fbxw7	HOM
Pibf1	HOM
Slc31A2	HOM
Spen	HOM
Traf3Ip3	HOM
7Sk	HOM
Helz	HOM
Ube2G2	HOM
Notch2	HOM
Rnf138	HOM
Zfp467	HOM
Ddx49	HOM
Arrdc1	HOM
Icosl	HOM
Hexim1	HOM
Rnf214	HOM
Usp4	HOM
Cspp1	HOM
Zfp358	HOM
Nrbp1	HOM
Golgb1	HOM
Crlf3	HOM
Larp7	HOM
Zfp263	HOM
Mrpl37	HOM
Adcy7	HOM
Smad7	HOM
Med21	HOM
Mtx3	HOM
Riok2	HOM
Rnf139	HOM
Mettl10	HOM
Ampd3	HOM
Zw10	HOM
Npl	HOM
Arhgap12	HOM
Crls1	HOM
Rpap3	HOM
Pecr	HOM
Ylpm1	HOM
Au040320	HOM
Ing2	HOM
Gmip	HOM
Rnasel	HOM
1300018I17Rik	HOM
Mtmr3	HOM
Notch1	HOM
Stard8	HOM
Gfpt1	HOM
Aff1	HOM
Tbc1D17	HOM
Heatr5A	HOM
Ralgps2	HOM
Fhod1	HOM
Mzt2	HOM
Paqr7	HOM
Mtf1	HOM
Zfp398	HOM
Diexf	HOM
Rbl1	HOM
Tmcc1	HOM
Ftsj2	HOM
Arhgap22	HOM
Kif13A	HOM
Hist3H2A	HOM
Nfatc2	HOM
Dnajc28	HOM
Garnl3	HOM
Fam26F	HOM
Rpl7L1	HOM
C1Rl	HOM
Ovca2	HOM
Tex10	HOM
Hnmt	HOM
Casp8	HOM
4930444A02Rik	HOM
Smpd2	HOM
N4Bp2L1	HOM
Tnrc6C	HOM
Ehbp1L1	HOM
Tia1	HOM
Braf	HOM
Ak3	HOM
Adck2	HOM
Apoe	PAM
Arpc1B	PAM
Axl	PAM
B2M	PAM
C1Qa	PAM
C1Qb	PAM
C1Qc	PAM
C4A	PAM
C4B	PAM
Cd63	PAM
Cd63-Ps	PAM
Cd9	PAM
Clu	PAM
Csf1R	PAM
Cst3	PAM
Ctsa	PAM
Ctsb	PAM
Ctsd	PAM
Ctsh	PAM
Ctsl	PAM
Ctss	PAM
Ctsz	PAM
Cx3Cr1	PAM
Cyba	PAM
Fcer1G	PAM
Fcgr3	PAM
Fcrls	PAM
Gfap	PAM
Gns	PAM
Gpx4	PAM
Grn	PAM
Gusb	PAM
H2-D1	PAM
H2-K1	PAM
Hexa	PAM
Hexb	PAM
Igfbp5	PAM
Itgb5	PAM
Itm2B	PAM
Laptm5	PAM
Lgals3Bp	PAM
Lgmn	PAM
Ly86	PAM
Lyz2	PAM
Man2B1	PAM
Mpeg1	PAM
Npc2	PAM
Olfml3	PAM
Plek	PAM
Prdx6	PAM
Rp23-269H21.1	PAM
Rpl18A	PAM
S100A6	PAM
Serpina3N	PAM
Trem2	PAM
Tyrobp	PAM
Vsir	PAM
Acaca	ARM
Actr3B	ARM
Adssl1	ARM
Ankh	ARM
Anxa2	ARM
Anxa5	ARM
Apbb2	ARM
Aplp2	ARM
Apoe	ARM
Arhgap24	ARM
Arhgap26	ARM
Atf3	ARM
Atp6V0D2	ARM
Axl	ARM
B2M	ARM
Baiap2L2	ARM
Bhlhe40	ARM
C3Ar1	ARM
Cadm1	ARM
Capg	ARM
Ccl4	ARM
Cd274	ARM
Cd34	ARM
Cd48	ARM
Cd63	ARM
Cd72	ARM
Cd74	ARM
Cd83	ARM
Cd9	ARM
Ch25H	ARM
Cox6A2	ARM
Cpq	ARM
Creg1	ARM
Crlf2	ARM
Csf1	ARM
Csf2Ra	ARM
Cstb	ARM
Ctsa	ARM
Ctsb	ARM
Ctss	ARM
Ctsz	ARM
Cxcl16	ARM
Dgkz	ARM
Dkk2	ARM
Dnajb14	ARM
Dpp7	ARM
Efr3B	ARM
Egln3	ARM
Egr2	ARM
Eno1	ARM
Ephx1	ARM
Fabp5	ARM
Fam20C	ARM
Fau	ARM
Fgr	ARM
Flt1	ARM
Gas2L3	ARM
Gcnt2	ARM
Got1	ARM
Gpi	ARM
Gpnmb	ARM
Gpr65	ARM
Gusb	ARM
Hacd2	ARM
Hexa	ARM
Hif1A	ARM
Hla-Dqb1	ARM
Hpse	ARM
Ifitm3	ARM
Igf1	ARM
Inf2	ARM
Itgax	ARM
Kcnj2	ARM
Kiaa1217	ARM
Ldha	ARM
Ldlr	ARM
Lgals3	ARM
Lgals3Bp	ARM
Lpl	ARM
Lrpap1	ARM
Ly86	ARM
Ly9	ARM
Mamdc2	ARM
Milr1	ARM
Myo1E	ARM
Myo5A	ARM
Nceh1	ARM
Ndufa1	ARM
Npc2	ARM
Nrp1	ARM
P2Rx4	ARM
Pea15	ARM
Pkm	ARM
Plaur	ARM
Pld3	ARM
Plek	ARM
Plekhh2	ARM
Plekhm2	ARM
Ptchd1	ARM
Rab7B	ARM
Ramp1	ARM
Rftn1	ARM
Rpl10A	ARM
Rpl19	ARM
Rpl23	ARM
Rpl32	ARM
Rpl41	ARM
Rplp1	ARM
Rps14	ARM
Rps16	ARM
Rps20	ARM
Rps5	ARM
Rtcb	ARM
Scpep1	ARM
Serpine2	ARM
Slc11A1	ARM
Slc16A3	ARM
Slc2A1	ARM
Slc2A6	ARM
Soat1	ARM
Spp1	ARM
St14	ARM
St8Sia6	ARM
Sulf2	ARM
Tlr2	ARM
Tnfsf8	ARM
Tpd52	ARM
Trem2	ARM
Tspo	ARM
Ttyh2	ARM
Tyrobp	ARM
Cd163	CAM
Lyve1	CAM
Mrc1	CAM
Siglec1	CAM
Stab1	CAM
Il1B	CR
Il1A	CR
Il6	CR
Il1Rap	CR
Il4I1	CR
Ccl2	CR
Ccl3	CR
Ccl4	CR
Ccl4L2	CR
Cxcl8	CR
Nfkbid	CR
Il6	Pro-Inf
Il17A	Pro-Inf
Il18	Pro-Inf
Il23A	Pro-Inf
Mmp9	Pro-Inf
Mmp12	Pro-Inf
Ifng	Pro-Inf
Tnf	Pro-Inf
Ccl5	Pro-Inf
Ccl20	Pro-Inf
Cxcl1	Pro-Inf
Cxcl9	Pro-Inf
Cxcl10	Pro-Inf
Cd14	Pro-Inf
Fcgr3A	Pro-Inf
Fcgr2A	Pro-Inf
Cd40	Pro-Inf
Cd86	Pro-Inf
Hla-Dra	Pro-Inf
Ccl2	Anti-Inf
Ccl17	Anti-Inf
Ccl22	Anti-Inf
Il4	Anti-Inf
Il10	Anti-Inf
Il13	Anti-Inf
Retnlb	Anti-Inf
Bdnf	Anti-Inf
Csf1	Anti-Inf
Gdnf	Anti-Inf
Igf1	Anti-Inf
Tgif1	Anti-Inf
Ngf	Anti-Inf
Nts	Anti-Inf
Grn	Anti-Inf
Cd163	Anti-Inf
Mrc1	Anti-Inf
Ifit2	IRM
Ifit3	IRM
Ifit1	IRM
Mx1	IRM
Mx2	IRM
Rsad2	IRM
Herc6	IRM
Usp18	IRM
Oas3	IRM
Parp14	IRM
Ifi44l	IRM
Ifi44l	IRM
Stat1	IRM
Ifi6	IRM
Irf7	IRM
Stat2	IRM
Siglec1	IRM
Parp12	IRM
Rabgap1l	IRM
Pnpt1	IRM
Sco2	IRM
Ephb2	IRM
Samd9	IRM
Sp110	IRM
Ifih1	IRM
Oas1	IRM
Parp9	IRM
Ddx60	IRM
Xaf1	IRM
Herc5	IRM
Isg15	IRM
Ddx58	IRM
Samd9l	IRM
Epsti1	IRM
Mki67	Cycling
Top2a	Cycling
Aspm	Cycling
Diaph3	Cycling
Fam111b	Cycling
Dtl	Cycling
Rrm2	Cycling
Kif18b	Cycling
Ndc80	Cycling
Ncapg	Cycling
Neil3	Cycling
Tpx2	Cycling
Kif14	Cycling
Polq	Cycling
Kif4a	Cycling
Cdc45	Cycling
Mcm10	Cycling
Kif23	Cycling
Cdca2	Cycling
Kifc1	Cycling
Prc1	Cycling
Anln	Cycling
Ttk	Cycling
Cenpf	Cycling
Cdc25c	Cycling
Kif15	Cycling
Cenpu	Cycling
